# Supplementary material
Source: publisher figshare collection journal article supplement (https://gsapubs.figshare.com/ndownloader/files/28858686)
Supplement: Supplementary file 1 [file 28858686]

## Sheet: S1. U-Pb Chil1
Sample Name: Chilhowee (Weisner Mtn)	624125	3766739						207/235		206/238		207/206		Best age
Grain #	[U] ppm	U/Th	207/235	2σ error	206/238	2σ error	RHO	Age Ma	2σ error	Age (Ma)	2σ error	Age (Ma)	2σ error	(Ma)	2σ error	% Discordance*	Th/U
Chil1.101	10.9	-83	3.58	0.9	0.183	0.017	0	1240	160	1066	87	1490	360	1066	87	14.0323	-0.0120482
Chil1.33	19.7	-440	1.95	0.19	0.187	0.0072	0	1031	64	1111	39	920	200	1111	39	7.75946	-0.00227273
Chil1.95	203	690	1.508	0.05	0.163	0.0033	0	927	20	972	18	813	80	972	18	4.85437	0.00144928
Chil1.16	34.8	32.8	1.94	0.12	0.1881	0.0052	0	1077	42	1109	28	940	140	1109	28	2.97122	0.0304878
Chil1.51	189	12.8	1.731	0.084	0.1687	0.0049	0	1005	29	1003	27	999	86	1003	27	0.199005	0.078125
Chil1.106	760	11.3	1.162	0.075	0.1228	0.0079	0	765	36	741	45	928	61	741	45	3.13725	0.0884956
Chil1.96	129	8.3	1.632	0.077	0.1635	0.0042	0	969	27	975	23	947	86	975	23	0.619195	0.120482
Chil1.48	603	3.775	2.959	0.05	0.2569	0.003	0	1397	12	1473	15	1289	35	1289	35	14.2746	0.264901
Chil1.78	1378	3.491	1.243	0.022	0.1251	0.0016	0	818.7	9.9	759.9	8.9	987	29	759.9	8.9	7.18212	0.286451
Chil1.20	67.2	3.444	1.77	0.067	0.1768	0.0033	0	1024	25	1049	18	948	83	1049	18	2.44141	0.29036
Chil1.110	82.1	3.34	2.44	0.097	0.2285	0.0047	0	1244	30	1328	24	1083	88	1083	24	6.75241	0.299401
Chil1.63	152	3.28	2.029	0.081	0.2008	0.0041	0	1117	27	1178	22	1000	73	1178	22	5.46106	0.304878
Chil1.09	1090	3.22	1.44	0.14	0.129	0.012	0	854	52	772	65	1213	52	772	65	9.60187	0.310559
Chil1.83	207	2.947	2.78	0.18	0.2267	0.0048	0	1328	41	1316	25	1376	92	1376	92	4.36047	0.339328
Chil1.36	103	2.834	1.449	0.065	0.1682	0.0046	0	898	26	1000	26	680	100	1000	26	11.3586	0.352858
Chil1.71	294	2.738	1.588	0.046	0.1703	0.0029	0	966	18	1013	16	846	60	1013	16	4.86542	0.36523
Chil1.109	113	2.548	2.404	0.097	0.2202	0.0053	0	1239	28	1281	28	1143	80	1143	28	3.38983	0.392465
Chil1.88	126.8	2.542	2.49	0.15	0.2204	0.005	0	1239	27	1282	26	1189	81	1189	26	3.47054	0.393391
Chil1.55	173	2.436	2.99	0.082	0.2623	0.0046	0	1400	21	1504	23	1281	55	1281	55	17.4083	0.410509
Chil1.52	119	2.402	2.087	0.067	0.1943	0.0054	0	1139	23	1142	29	1168	67	1142	29	0.263389	0.41632
Chil1.40	144	2.367	2.029	0.061	0.1912	0.0044	0	1121	21	1126	24	1118	66	1126	24	0.44603	0.422476
Chil1.107	60.1	2.298	2.03	0.11	0.1941	0.0057	0	1105	35	1141	31	960	120	1141	31	3.25792	0.435161
Chil1.31	74.1	2.295	3.15	0.12	0.2587	0.0049	0	1437	31	1482	25	1342	83	1342	83	10.4322	0.43573
Chil1.46	304	2.29	2.92	0.081	0.2431	0.0045	0	1384	20	1405	24	1362	44	1362	44	3.15712	0.436681
Chil1.61	194	2.28	1.735	0.075	0.1623	0.0038	0	1023	26	968	21	1156	82	968	21	5.37634	0.438596
Chil1.68	107	2.21	2.344	0.085	0.2103	0.0045	0	1214	27	1233	25	1172	83	1172	25	1.56507	0.452489
Chil1.45	334	2.191	2.689	0.087	0.2347	0.0035	0	1316	18	1358	18	1273	43	1273	43	6.67714	0.456413
Chil1.13	62.1	2.164	2.7	0.11	0.2401	0.0055	0	1318	31	1389	28	1217	84	1217	84	14.1331	0.462107
Chil1.22	56.7	2.159	1.802	0.085	0.1742	0.0042	0	1043	32	1034	23	1020	110	1034	23	0.862895	0.463177
Chil1.02	35.9	2.157	2.37	0.12	0.2169	0.0061	0	1214	31	1263	32	1100	110	1100	32	4.03624	0.463607
Chil1.103	248	2.15	2.268	0.071	0.2124	0.0054	0	1193	23	1244	28	1106	63	1106	28	4.27494	0.465116
Chil1.113	24.5	2.144	2.79	0.2	0.231	0.0081	0	1320	59	1335	43	1280	160	1280	160	4.29688	0.466418
Chil1.94	273	2.143	3.037	0.07	0.2549	0.0036	0	1412	17	1463	18	1323	42	1323	42	10.582	0.466636
Chil1.104	48.3	2.14	1.81	0.12	0.1704	0.0053	0	1024	46	1012	30	1010	150	1012	30	1.17188	0.46729
Chil1.03	144.4	2.099	2.51	0.06	0.2235	0.0039	0	1273	17	1299	21	1219	57	1219	57	6.56276	0.476417
Chil1.25	160	2.05	1.711	0.069	0.1747	0.0043	0	1001	27	1037	24	923	92	1037	24	3.5964	0.487805
Chil1.114	455	2.05	9.9	0.64	0.409	0.027	0	2341	87	2160	130	2632	27	2632	27	17.9331	0.487805
Chil1.90	43.9	2.048	1.786	0.095	0.1769	0.0044	0	1030	34	1048	24	950	120	1048	24	1.74757	0.488281
Chil1.34	151	2.043	1.704	0.058	0.1696	0.0027	0	1001	22	1009	15	985	77	1009	15	0.799201	0.489476
Chil1.11	79	2.027	2.33	0.12	0.2156	0.007	0	1216	39	1260	36	1120	100	1120	36	3.61842	0.49334
Chil1.105	59	2.007	1.76	0.11	0.1836	0.0054	0	1005	40	1084	30	800	120	1084	30	7.8607	0.498256
Chil1.30	246	1.991	2.803	0.068	0.2354	0.0048	0	1354	18	1361	25	1375	47	1375	47	1.01818	0.50226
Chil1.53	100.1	1.948	2.844	0.089	0.2461	0.0047	0	1357	24	1420	23	1267	66	1267	66	12.0758	0.513347
Chil1.39	55.3	1.944	2.27	0.12	0.2121	0.0062	0	1190	40	1237	33	1070	130	1070	33	3.94958	0.514403
Chil1.24	139	1.868	2.649	0.084	0.2307	0.005	0	1305	24	1337	26	1240	69	1240	69	7.82258	0.535332
Chil1.115	74	1.859	3.05	0.17	0.2269	0.0058	0	1393	40	1316	31	1490	100	1490	100	11.6779	0.537924
Chil1.64	42.1	1.82	2.34	0.14	0.2098	0.006	0	1200	41	1225	32	1120	130	1120	32	2.08333	0.549451
Chil1.99	362	1.794	2.063	0.072	0.1925	0.0057	0	1126	25	1133	31	1174	49	1133	31	0.62167	0.557414
Chil1.74	178	1.766	2.888	0.086	0.2434	0.0055	0	1373	22	1402	28	1336	66	1336	66	4.94012	0.566251
Chil1.80	60.5	1.725	2.53	0.11	0.2273	0.0065	0	1261	33	1327	32	1149	97	1149	32	5.23394	0.57971
Chil1.26	288	1.716	2.907	0.069	0.2465	0.0057	0	1381	17	1418	29	1343	47	1343	47	5.58451	0.582751
Chil1.81	821	1.694	1.701	0.086	0.1409	0.008	0	995	32	844	45	1410	41	844	45	15.1759	0.590319
Chil1.10	63.1	1.66	2.44	0.11	0.217	0.0067	0	1250	31	1263	36	1209	87	1209	87	4.4665	0.60241
Chil1.19	1090	1.627	1.57	0.11	0.128	0.01	0	922	45	770	57	1480	48	770	57	16.4859	0.614628
Chil1.07	278	1.623	2.511	0.055	0.2041	0.0034	0	1270	16	1196	18	1415	34	1196	18	5.82677	0.616143
Chil1.72	232	1.6	10.34	0.58	0.456	0.025	0	2460	56	2390	120	2490	40	2490	40	4.01606	0.625
Chil1.44	134	1.598	3.06	0.15	0.2448	0.0053	0	1402	36	1409	27	1399	91	1399	91	0.714796	0.625782
Chil1.43	722	1.568	2.19	0.13	0.187	0.011	0	1145	43	1093	59	1364	50	1093	59	4.54148	0.637755
Chil1.58	180	1.539	2.4	0.075	0.2174	0.0043	0	1243	20	1267	23	1204	51	1204	51	5.23256	0.649773
Chil1.17	267	1.514	2.534	0.062	0.2267	0.0036	0	1276	18	1316	19	1217	52	1217	52	8.13476	0.660502
Chil1.65	66.1	1.497	2.89	0.11	0.2392	0.0053	0	1364	29	1381	28	1362	75	1362	75	1.39501	0.668003
Chil1.108	52.9	1.489	1.222	0.091	0.1291	0.0069	0	788	43	779	39	840	160	779	39	1.14213	0.671592
Chil1.12	148	1.489	2.302	0.066	0.2171	0.0037	0	1213	20	1266	19	1097	61	1097	19	4.36933	0.671592
Chil1.66	90.4	1.486	2.73	0.1	0.2319	0.0053	0	1329	26	1343	28	1327	80	1327	80	1.20573	0.672948
Chil1.21	76.4	1.45	11.52	0.27	0.488	0.011	0	2561	22	2564	45	2572	37	2572	37	0.311042	0.689655
Chil1.29	55.6	1.434	1.594	0.08	0.1563	0.0037	0	950	32	935	21	960	120	935	21	1.57895	0.69735
Chil1.57	187	1.422	10.02	0.56	0.414	0.023	0	2385	66	2210	110	2638	37	2638	37	16.2244	0.703235
Chil1.23	129.1	1.416	2.955	0.073	0.2513	0.0036	0	1390	19	1446	19	1306	54	1306	54	10.7198	0.706215
Chil1.14	217	1.346	1.733	0.042	0.1785	0.0028	0	1019	16	1058	15	945	56	1058	15	3.82728	0.742942
Chil1.75	294	1.327	3.044	0.077	0.2613	0.0037	0	1418	18	1495	19	1307	48	1307	48	14.3841	0.75358
Chil1.98	203	1.323	0.486	0.028	0.0672	0.0014	0	396	19	419.2	8.7	300	120	419.2	8.7	5.85859	0.755858
Chil1.42	146.6	1.305	2.693	0.087	0.2338	0.0058	0	1332	22	1352	30	1310	56	1310	56	3.20611	0.766284
Chil1.91	167	1.253	1.736	0.051	0.1559	0.0033	0	1016	19	933	19	1199	68	933	19	8.16929	0.798085
Chil1.38	1440	1.234	1.386	0.067	0.1199	0.0069	0	868	30	725	41	1377	54	725	41	16.4747	0.810373
Chil1.04	100.5	1.216	2.822	0.089	0.2325	0.0049	0	1356	22	1349	25	1395	64	1395	64	3.29749	0.822368
Chil1.93	231	1.214	2.427	0.085	0.2183	0.0059	0	1238	27	1281	29	1219	51	1219	51	5.08614	0.823723
Chil1.28	52.9	1.14	1.89	0.12	0.149	0.013	0	1053	44	880	68	1490	120	880	68	16.4292	0.877193
Chil1.06	462	1.118	2.323	0.082	0.178	0.0065	0	1210	27	1052	37	1558	35	1052	37	13.0579	0.894454
Chil1.37	473	1.11	1.239	0.035	0.109	0.0026	0	814	16	666	15	1231	51	666	15	18.1818	0.900901
Chil1.111	823	1.078	2.06	0.052	0.16	0.0046	0	1132	18	955	26	1509	49	955	26	15.636	0.927644
Chil1.100	518	1.023	2.88	0.15	0.219	0.011	0	1359	48	1266	63	1562	41	1562	41	18.9501	0.977517
Chil1.79	363	1.013	1.795	0.069	0.1468	0.0047	0	1037	24	881	26	1429	48	881	26	15.0434	0.987167
Chil1.50	186	0.964	3.13	0.11	0.2384	0.0064	0	1434	24	1375	33	1522	54	1522	54	9.65834	1.03734
Chil1.77	221	0.93	1.207	0.049	0.1044	0.0029	0	798	22	640	17	1277	81	640	17	19.7995	1.07527
Chil1.87	313	0.851	2.684	0.062	0.2258	0.0039	0	1324	17	1311	21	1341	43	1341	43	2.23714	1.17509
Chil1.70	349	0.6397	2.737	0.054	0.2366	0.0036	0	1335	15	1368	19	1299	38	1299	38	5.31178	1.56323
Chil1.05	9.33	0.1663	91.8	3.5	1.192	0.05	0	4577	44	5030	140	4392	38	4392	38	14.5264	6.01323
Chil1.08	955	0.926	1.396	0.085	0.1041	0.0074	0	876	35	633	42	1631	40	DISC	DISC	27.7397	1.07991
Chil1.102	416	1.545	7.72	0.28	0.336	0.012	0	2180	43	1858	59	2528	30	DISC	DISC	26.5032	0.647249
Chil1.112	73.6	1.236	8.5	3.5	0.264	0.039	0	1760	190	1370	120	1870	220	DISC	DISC	26.738	0.809061
Chil1.27	3520	1.873	0.4457	0.0069	0.0306	0.00045	0	373.8	4.8	194.3	2.8	1738	30	DISC	DISC	48.0203	0.533903
Chil1.47	3120	0.832	0.544	0.022	0.0376	0.0024	0	438	14	237	15	1962	59	DISC	DISC	45.8904	1.20192
Chil1.49	750	1.714	2.72	0.14	0.207	0.01	0	1298	50	1202	58	1562	40	DISC	DISC	23.0474	0.583431
Chil1.54	1550	1.319	1.332	0.086	0.1003	0.0075	0	833	39	611	44	1639	49	DISC	DISC	26.6507	0.75815
Chil1.56	2030	0.725	0.755	0.024	0.0529	0.0015	0	572	15	331.9	9.2	1706	34	DISC	DISC	41.9755	1.37931
Chil1.59	685	2.69	3.88	0.18	0.252	0.01	0	1585	41	1442	55	1822	29	DISC	DISC	20.8562	0.371747
Chil1.62	2860	2.581	0.517	0.018	0.0344	0.0016	0	421	12	218	10	1843	41	DISC	DISC	48.2185	0.387447
Chil1.67	201	2.55	7.5	1.2	0.263	0.015	0	1810	140	1489	79	2090	200	DISC	DISC	28.756	0.392157
Chil1.69	88.2	0.764	2.26	0.1	0.1521	0.0045	0	1182	33	911	25	1715	85	DISC	DISC	22.9272	1.3089
Chil1.73	2700	1.241	1.128	0.054	0.0516	0.0027	0	755	25	324	17	2464	28	DISC	DISC	57.0861	0.805802
Chil1.82	66.5	0.86	10.3	1.9	0.271	0.02	0	1980	170	1530	100	2330	230	DISC	DISC	34.3348	1.16279
Chil1.84	370	1.139	1.84	0.12	0.1174	0.0035	0	1034	39	715	20	1770	100	DISC	DISC	30.8511	0.877963
Chil1.85	16.7	5.32	4.18	0.32	0.209	0.012	0	1624	65	1214	59	2210	160	DISC	DISC	45.0679	0.18797
Chil1.86	1340	1.86	4	0.35	0.185	0.016	0	1522	85	1076	86	2412	25	DISC	DISC	29.3035	0.537634
Chil1.89	102.8	0.733	8.24	0.28	0.3613	0.009	0	2242	31	1983	43	2504	44	DISC	DISC	20.8067	1.36426
Chil1.01	0.037	0	0	0	0	0	0	0	0	0	0	0	0	#DIV/0!	#DIV/0!	#DIV/0!	#DIV/0!
Chil1.116	0.0221	0	0	0	0	0	0	0	0	0	0	0	0	#DIV/0!	#DIV/0!	#DIV/0!	#DIV/0!
Chil1.18	0.053	0	0	0	0	0	0	0	0	0	0	0	0	#DIV/0!	#DIV/0!	#DIV/0!	#DIV/0!
Chil1.32	-0.12	0	0	0	0	0	0	0	0	0	0	0	0	#DIV/0!	#DIV/0!	#DIV/0!	#DIV/0!
Chil1.76	0.139	0	0	0	0	0	0	0	0	0	0	0	0	#DIV/0!	#DIV/0!	#DIV/0!	#DIV/0!
Chil1.92	0.566	0	0	0	0	0	0	0	0	0	0	0	0	#DIV/0!	#DIV/0!	#DIV/0!	#DIV/0!
0	0	0	0	0	0	0	0	0	0	0	0	0	0	#DIV/0!	#DIV/0!	#DIV/0!	Core
0	0	0	0	0	0	0	0	0	0	0	0	0	0	#DIV/0!	#DIV/0!	#DIV/0!	Core
0	0	0	0	0	0	0	0	0	0	0	0	0	0	#DIV/0!	#DIV/0!	#DIV/0!	Core
0	0	0	0	0	0	0	0	0	0	0	0	0	0	#DIV/0!	#DIV/0!	#DIV/0!	Core
0	0	0	0	0	0	0	0	0	0	0	0	0	0	#DIV/0!	#DIV/0!	#DIV/0!	Core
0	0	0	0	0	0	0	0	0	0	0	0	0	0	#DIV/0!	#DIV/0!	#DIV/0!	Core
0	0	0	0	0	0	0	0	0	0	0	0	0	0	#DIV/0!	#DIV/0!	#DIV/0!	Core
0	0	0	0	0	0	0	0	0	0	0	0	0	0	#DIV/0!	#DIV/0!	#DIV/0!	Core
0	0	0	0	0	0	0	0	0	0	0	0	0	0	#DIV/0!	#DIV/0!	#DIV/0!	Core
0	0	0	0	0	0	0	0	0	0	0	0	0	0	#DIV/0!	#DIV/0!	#DIV/0!	Core
0	0	0	0	0	0	0	0	0	0	0	0	0	0	#DIV/0!	#DIV/0!	#DIV/0!	Core
0	0	0	0	0	0	0	0	0	0	0	0	0	0	#DIV/0!	#DIV/0!	#DIV/0!	Core
0	0	0	0	0	0	0	0	0	0	0	0	0	0	#DIV/0!	#DIV/0!	#DIV/0!	Core
0	0	0	0	0	0	0	0	0	0	0	0	0	0	#DIV/0!	#DIV/0!	#DIV/0!	Core
0	0	0	0	0	0	0	0	0	0	0	0	0	0	#DIV/0!	#DIV/0!	#DIV/0!	Core
0	0	0	0	0	0	0	0	0	0	0	0	0	0	#DIV/0!	#DIV/0!	#DIV/0!	Core
0	0	0	0	0	0	0	0	0	0	0	0	0	0	#DIV/0!	#DIV/0!	#DIV/0!	Core
0	0	0	0	0	0	0	0	0	0	0	0	0	0	#DIV/0!	#DIV/0!	#DIV/0!	Core
0	0	0	0	0	0	0	0	0	0	0	0	0	0	#DIV/0!	#DIV/0!	#DIV/0!	Core
0	0	0	0	0	0	0	0	0	0	0	0	0	0	#DIV/0!	#DIV/0!	#DIV/0!	Core
0	0	0	0	0	0	0	0	0	0	0	0	0	0	#DIV/0!	#DIV/0!	#DIV/0!	Core
0	0	0	0	0	0	0	0	0	0	0	0	0	0	#DIV/0!	#DIV/0!	#DIV/0!	Core
0	0	0	0	0	0	0	0	0	0	0	0	0	0	#DIV/0!	#DIV/0!	#DIV/0!	Core
0	0	0	0	0	0	0	0	0	0	0	0	0	0	#DIV/0!	#DIV/0!	#DIV/0!	Core
0	0	0	0	0	0	0	0	0	0	0	0	0	0	#DIV/0!	#DIV/0!	#DIV/0!	Core
0	0	0	0	0	0	0	0	0	0	0	0	0	0	#DIV/0!	#DIV/0!	#DIV/0!	Core
0	0	0	0	0	0	0	0	0	0	0	0	0	0	#DIV/0!	#DIV/0!	#DIV/0!	Core
0	0	0	0	0	0	0	0	0	0	0	0	0	0	#DIV/0!	#DIV/0!	#DIV/0!	Core
0	0	0	0	0	0	0	0	0	0	0	0	0	0	#DIV/0!	#DIV/0!	#DIV/0!	Core
0	0	0	0	0	0	0	0	0	0	0	0	0	0	#DIV/0!	#DIV/0!	#DIV/0!	Core
0	0	0	0	0	0	0	0	0	0	0	0	0	0	#DIV/0!	#DIV/0!	#DIV/0!	Core
0	0	0	0	0	0	0	0	0	0	0	0	0	0	#DIV/0!	#DIV/0!	#DIV/0!	Core
0	0	0	0	0	0	0	0	0	0	0	0	0	0	#DIV/0!	#DIV/0!	#DIV/0!	Core
0	0	0	0	0	0	0	0	0	0	0	0	0	0	#DIV/0!	#DIV/0!	#DIV/0!	Core
0	0	0	0	0	0	0	0	0	0	0	0	0	0	#DIV/0!	#DIV/0!	#DIV/0!	Core
0	0	0	0	0	0	0	0	0	0	0	0	0	0	#DIV/0!	#DIV/0!	#DIV/0!	Core
0	0	0	0	0	0	0	0	0	0	0	0	0	0	#DIV/0!	#DIV/0!	#DIV/0!	Core
0	0	0	0	0	0	0	0	0	0	0	0	0	0	#DIV/0!	#DIV/0!	#DIV/0!	Core
0	0	0	0	0	0	0	0	0	0	0	0	0	0	#DIV/0!	#DIV/0!	#DIV/0!	Core
0	0	0	0	0	0	0	0	0	0	0	0	0	0	#DIV/0!	#DIV/0!	#DIV/0!	Core
0	0	0	0	0	0	0	0	0	0	0	0	0	0	#DIV/0!	#DIV/0!	#DIV/0!	Core
0	0	0	0	0	0	0	0	0	0	0	0	0	0	#DIV/0!	#DIV/0!	#DIV/0!	Core
0	0	0	0	0	0	0	0	0	0	0	0	0	0	#DIV/0!	#DIV/0!	#DIV/0!	Core
0	0	0	0	0	0	0	0	0	0	0	0	0	0	#DIV/0!	#DIV/0!	#DIV/0!	Core
0	0	0	0	0	0	0	0	0	0	0	0	0	0	#DIV/0!	#DIV/0!	#DIV/0!	Core
0	0	0	0	0	0	0	0	0	0	0	0	0	0	#DIV/0!	#DIV/0!	#DIV/0!	Core
0	0	0	0	0	0	0	0	0	0	0	0	0	0	#DIV/0!	#DIV/0!	#DIV/0!	Core
0	0	0	0	0	0	0	0	0	0	0	0	0	0	#DIV/0!	#DIV/0!	#DIV/0!	Core
0	0	0	0	0	0	0	0	0	0	0	0	0	0	#DIV/0!	#DIV/0!	#DIV/0!	Core
0	0	0	0	0	0	0	0	0	0	0	0	0	0	#DIV/0!	#DIV/0!	#DIV/0!	Core
0	0	0	0	0	0	0	0	0	0	0	0	0	0	#DIV/0!	#DIV/0!	#DIV/0!	Core
0	0	0	0	0	0	0	0	0	0	0	0	0	0	#DIV/0!	#DIV/0!	#DIV/0!	Core
0	0	0	0	0	0	0	0	0	0	0	0	0	0	#DIV/0!	#DIV/0!	#DIV/0!	Core
0	0	0	0	0	0	0	0	0	0	0	0	0	0	#DIV/0!	#DIV/0!	#DIV/0!	Core
0	0	0	0	0	0	0	0	0	0	0	0	0	0	#DIV/0!	#DIV/0!	#DIV/0!	Core
0	0	0	0	0	0	0	0	0	0	0	0	0	0	#DIV/0!	#DIV/0!	#DIV/0!	Core
0	0	0	0	0	0	0	0	0	0	0	0	0	0	#DIV/0!	#DIV/0!	#DIV/0!	Core
0	0	0	0	0	0	0	0	0	0	0	0	0	0	#DIV/0!	#DIV/0!	#DIV/0!	Core
0	0	0	0	0	0	0	0	0	0	0	0	0	0	#DIV/0!	#DIV/0!	#DIV/0!	Core
0	0	0	0	0	0	0	0	0	0	0	0	0	0	#DIV/0!	#DIV/0!	#DIV/0!	Core
0	0	0	0	0	0	0	0	0	0	0	0	0	0	#DIV/0!	#DIV/0!	#DIV/0!	Core
0	0	0	0	0	0	0	0	0	0	0	0	0	0	#DIV/0!	#DIV/0!	#DIV/0!	Core
0	0	0	0	0	0	0	0	0	0	0	0	0	0	#DIV/0!	#DIV/0!	#DIV/0!	Core
0	0	0	0	0	0	0	0	0	0	0	0	0	0	#DIV/0!	#DIV/0!	#DIV/0!	Core
0	0	0	0	0	0	0	0	0	0	0	0	0	0	#DIV/0!	#DIV/0!	#DIV/0!	Core
0	0	0	0	0	0	0	0	0	0	0	0	0	0	#DIV/0!	#DIV/0!	#DIV/0!	Core
0	0	0	0	0	0	0	0	0	0	0	0	0	0	#DIV/0!	#DIV/0!	#DIV/0!	Core
0	0	0	0	0	0	0	0	0	0	0	0	0	0	#DIV/0!	#DIV/0!	#DIV/0!	Core
0	0	0	0	0	0	0	0	0	0	0	0	0	0	#DIV/0!	#DIV/0!	#DIV/0!	Core
0	0	0	0	0	0	0	0	0	0	0	0	0	0	#DIV/0!	#DIV/0!	#DIV/0!	Core
0	0	0	0	0	0	0	0	0	0	0	0	0	0	#DIV/0!	#DIV/0!	#DIV/0!	Core
0	0	0	0	0	0	0	0	0	0	0	0	0	0	#DIV/0!	#DIV/0!	#DIV/0!	Core
0	0	0	0	0	0	0	0	0	0	0	0	0	0	#DIV/0!	#DIV/0!	#DIV/0!	Core
0	0	0	0	0	0	0	0	0	0	0	0	0	0	#DIV/0!	#DIV/0!	#DIV/0!	Core
0	0	0	0	0	0	0	0	0	0	0	0	0	0	#DIV/0!	#DIV/0!	#DIV/0!	Core
0	0	0	0	0	0	0	0	0	0	0	0	0	0	#DIV/0!	#DIV/0!	#DIV/0!	Core
0	0	0	0	0	0	0	0	0	0	0	0	0	0	#DIV/0!	#DIV/0!	#DIV/0!	Core
0	0	0	0	0	0	0	0	0	0	0	0	0	0	#DIV/0!	#DIV/0!	#DIV/0!	Core
0	0	0	0	0	0	0	0	0	0	0	0	0	0	#DIV/0!	#DIV/0!	#DIV/0!	Core
0	0	0	0	0	0	0	0	0	0	0	0	0	0	#DIV/0!	#DIV/0!	#DIV/0!	Core
0	0	0	0	0	0	0	0	0	0	0	0	0	0	#DIV/0!	#DIV/0!	#DIV/0!	Core
0	0	0	0	0	0	0	0	0	0	0	0	0	0	#DIV/0!	#DIV/0!	#DIV/0!	Core
0	0	0	0	0	0	0	0	0	0	0	0	0	0	#DIV/0!	#DIV/0!	#DIV/0!	Core
0	0	0	0	0	0	0	0	0	0	0	0	0	0	#DIV/0!	#DIV/0!	#DIV/0!	Core
0	0	0	0	0	0	0	0	0	0	0	0	0	0	#DIV/0!	#DIV/0!	#DIV/0!	Core
0	0	0	0	0	0	0	0	0	0	0	0	0	0	#DIV/0!	#DIV/0!	#DIV/0!	Core
0	0	0	0	0	0	0	0	0	0	0	0	0	0	#DIV/0!	#DIV/0!	#DIV/0!	Core
0	0	0	0	0	0	0	0	0	0	0	0	0	0	#DIV/0!	#DIV/0!	#DIV/0!	Core
0	0	0	0	0	0	0	0	0	0	0	0	0	0	#DIV/0!	#DIV/0!	#DIV/0!	Core
0	0	0	0	0	0	0	0	0	0	0	0	0	0	#DIV/0!	#DIV/0!	#DIV/0!	Core
0	0	0	0	0	0	0	0	0	0	0	0	0	0	#DIV/0!	#DIV/0!	#DIV/0!	Core
0	0	0	0	0	0	0	0	0	0	0	0	0	0	#DIV/0!	#DIV/0!	#DIV/0!	Core
0	0	0	0	0	0	0	0	0	0	0	0	0	0	#DIV/0!	#DIV/0!	#DIV/0!	Core
0	0	0	0	0	0	0	0	0	0	0	0	0	0	#DIV/0!	#DIV/0!	#DIV/0!	Core
0	0	0	0	0	0	0	0	0	0	0	0	0	0	#DIV/0!	#DIV/0!	#DIV/0!	Core
0	0	0	0	0	0	0	0	0	0	0	0	0	0	#DIV/0!	#DIV/0!	#DIV/0!	Core
0	0	0	0	0	0	0	0	0	0	0	0	0	0	#DIV/0!	#DIV/0!	#DIV/0!	Core
0	0	0	0	0	0	0	0	0	0	0	0	0	0	#DIV/0!	#DIV/0!	#DIV/0!	Core
0	0	0	0	0	0	0	0	0	0	0	0	0	0	#DIV/0!	#DIV/0!	#DIV/0!	Core
0	0	0	0	0	0	0	0	0	0	0	0	0	0	#DIV/0!	#DIV/0!	#DIV/0!	Core
0	0	0	0	0	0	0	0	0	0	0	0	0	0	#DIV/0!	#DIV/0!	#DIV/0!	Core
0	0	0	0	0	0	0	0	0	0	0	0	0	0	#DIV/0!	#DIV/0!	#DIV/0!	Core
0	0	0	0	0	0	0	0	0	0	0	0	0	0	#DIV/0!	#DIV/0!	#DIV/0!	Core
0	0	0	0	0	0	0	0	0	0	0	0	0	0	#DIV/0!	#DIV/0!	#DIV/0!	Core
0	0	0	0	0	0	0	0	0	0	0	0	0	0	#DIV/0!	#DIV/0!	#DIV/0!	Core
0	0	0	0	0	0	0	0	0	0	0	0	0	0	#DIV/0!	#DIV/0!	#DIV/0!	Core
0	0	0	0	0	0	0	0	0	0	0	0	0	0	#DIV/0!	#DIV/0!	#DIV/0!	Core
0	0	0	0	0	0	0	0	0	0	0	0	0	0	#DIV/0!	#DIV/0!	#DIV/0!	Core
0	0	0	0	0	0	0	0	0	0	0	0	0	0	#DIV/0!	#DIV/0!	#DIV/0!	Core
0	0	0	0	0	0	0	0	0	0	0	0	0	0	#DIV/0!	#DIV/0!	#DIV/0!	Core
0	0	0	0	0	0	0	0	0	0	0	0	0	0	#DIV/0!	#DIV/0!	#DIV/0!	Core
0	0	0	0	0	0	0	0	0	0	0	0	0	0	#DIV/0!	#DIV/0!	#DIV/0!	Core
0	0	0	0	0	0	0	0	0	0	0	0	0	0	#DIV/0!	#DIV/0!	#DIV/0!	Core
0	0	0	0	0	0	0	0	0	0	0	0	0	0	#DIV/0!	#DIV/0!	#DIV/0!	Core
0	0	0	0	0	0	0	0	0	0	0	0	0	0	#DIV/0!	#DIV/0!	#DIV/0!	Core
0	0	0	0	0	0	0	0	0	0	0	0	0	0	#DIV/0!	#DIV/0!	#DIV/0!	Core
0	0	0	0	0	0	0	0	0	0	0	0	0	0	#DIV/0!	#DIV/0!	#DIV/0!	Core
0	0	0	0	0	0	0	0	0	0	0	0	0	0	#DIV/0!	#DIV/0!	#DIV/0!	Core
0	0	0	0	0	0	0	0	0	0	0	0	0	0	#DIV/0!	#DIV/0!	#DIV/0!	Core
0	0	0	0	0	0	0	0	0	0	0	0	0	0	#DIV/0!	#DIV/0!	#DIV/0!	Core
0	0	0	0	0	0	0	0	0	0	0	0	0	0	#DIV/0!	#DIV/0!	#DIV/0!	Core
0	0	0	0	0	0	0	0	0	0	0	0	0	0	#DIV/0!	#DIV/0!	#DIV/0!	Core
0	0	0	0	0	0	0	0	0	0	0	0	0	0	#DIV/0!	#DIV/0!	#DIV/0!	Core
0	0	0	0	0	0	0	0	0	0	0	0	0	0	#DIV/0!	#DIV/0!	#DIV/0!	Core
0	0	0	0	0	0	0	0	0	0	0	0	0	0	#DIV/0!	#DIV/0!	#DIV/0!	Core
0	0	0	0	0	0	0	0	0	0	0	0	0	0	#DIV/0!	#DIV/0!	#DIV/0!	Core
0	0	0	0	0	0	0	0	0	0	0	0	0	0	#DIV/0!	#DIV/0!	#DIV/0!	Core
0	0	0	0	0	0	0	0	0	0	0	0	0	0	#DIV/0!	#DIV/0!	#DIV/0!	Core
0	0	0	0	0	0	0	0	0	0	0	0	0	0	#DIV/0!	#DIV/0!	#DIV/0!	Core
0	0	0	0	0	0	0	0	0	0	0	0	0	0	#DIV/0!	#DIV/0!	#DIV/0!	Core
0	0	0	0	0	0	0	0	0	0	0	0	0	0	#DIV/0!	#DIV/0!	#DIV/0!	Core
0	0	0	0	0	0	0	0	0	0	0	0	0	0	#DIV/0!	#DIV/0!	#DIV/0!	Core
0	0	0	0	0	0	0	0	0	0	0	0	0	0	#DIV/0!	#DIV/0!	#DIV/0!	Core
0	0	0	0	0	0	0	0	0	0	0	0	0	0	#DIV/0!	#DIV/0!	#DIV/0!	Core
0	0	0	0	0	0	0	0	0	0	0	0	0	0	#DIV/0!	#DIV/0!	#DIV/0!	Core
0	0	0	0	0	0	0	0	0	0	0	0	0	0	#DIV/0!	#DIV/0!	#DIV/0!	Core
0	0	0	0	0	0	0	0	0	0	0	0	0	0	#DIV/0!	#DIV/0!	#DIV/0!	Core
0	0	0	0	0	0	0	0	0	0	0	0	0	0	#DIV/0!	#DIV/0!	#DIV/0!	Core
0	0	0	0	0	0	0	0	0	0	0	0	0	0	#DIV/0!	#DIV/0!	#DIV/0!	Core
0	0	0	0	0	0	0	0	0	0	0	0	0	0	#DIV/0!	#DIV/0!	#DIV/0!	Core
0	0	0	0	0	0	0	0	0	0	0	0	0	0	#DIV/0!	#DIV/0!	#DIV/0!	Core
0	0	0	0	0	0	0	0	0	0	0	0	0	0	#DIV/0!	#DIV/0!	#DIV/0!	Core
0	0	0	0	0	0	0	0	0	0	0	0	0	0	#DIV/0!	#DIV/0!	#DIV/0!	Core
0	0	0	0	0	0	0	0	0	0	0	0	0	0	#DIV/0!	#DIV/0!	#DIV/0!	Core
0	0	0	0	0	0	0	0	0	0	0	0	0	0	#DIV/0!	#DIV/0!	#DIV/0!	Core
0	0	0	0	0	0	0	0	0	0	0	0	0	0	#DIV/0!	#DIV/0!	#DIV/0!	Core
0	0	0	0	0	0	0	0	0	0	0	0	0	0	#DIV/0!	#DIV/0!	#DIV/0!	Core
0	0	0	0	0	0	0	0	0	0	0	0	0	0	#DIV/0!	#DIV/0!	#DIV/0!	Core
0	0	0	0	0	0	0	0	0	0	0	0	0	0	#DIV/0!	#DIV/0!	#DIV/0!	Core
0	0	0	0	0	0	0	0	0	0	0	0	0	0	#DIV/0!	#DIV/0!	#DIV/0!	Core
0	0	0	0	0	0	0	0	0	0	0	0	0	0	#DIV/0!	#DIV/0!	#DIV/0!	Core
0	0	0	0	0	0	0	0	0	0	0	0	0	0	#DIV/0!	#DIV/0!	#DIV/0!	Core
0	0	0	0	0	0	0	0	0	0	0	0	0	0	#DIV/0!	#DIV/0!	#DIV/0!	Core
0	0	0	0	0	0	0	0	0	0	0	0	0	0	#DIV/0!	#DIV/0!	#DIV/0!	Core
0	0	0	0	0	0	0	0	0	0	0	0	0	0	#DIV/0!	#DIV/0!	#DIV/0!	Core
0	0	0	0	0	0	0	0	0	0	0	0	0	0	#DIV/0!	#DIV/0!	#DIV/0!	Core
0	0	0	0	0	0	0	0	0	0	0	0	0	0	#DIV/0!	#DIV/0!	#DIV/0!	Core
0	0	0	0	0	0	0	0	0	0	0	0	0	0	#DIV/0!	#DIV/0!	#DIV/0!	Core
0	0	0	0	0	0	0	0	0	0	0	0	0	0	#DIV/0!	#DIV/0!	#DIV/0!	Core
0	0	0	0	0	0	0	0	0	0	0	0	0	0	#DIV/0!	#DIV/0!	#DIV/0!	Core
0	0	0	0	0	0	0	0	0	0	0	0	0	0	#DIV/0!	#DIV/0!	#DIV/0!	Core
0	0	0	0	0	0	0	0	0	0	0	0	0	0	#DIV/0!	#DIV/0!	#DIV/0!	Core
0	0	0	0	0	0	0	0	0	0	0	0	0	0	#DIV/0!	#DIV/0!	#DIV/0!	Core
0	0	0	0	0	0	0	0	0	0	0	0	0	0	#DIV/0!	#DIV/0!	#DIV/0!	Core
0	0	0	0	0	0	0	0	0	0	0	0	0	0	#DIV/0!	#DIV/0!	#DIV/0!	Core
0	0	0	0	0	0	0	0	0	0	0	0	0	0	#DIV/0!	#DIV/0!	#DIV/0!	Core
0	0	0	0	0	0	0	0	0	0	0	0	0	0	#DIV/0!	#DIV/0!	#DIV/0!	Core
0	0	0	0	0	0	0	0	0	0	0	0	0	0	#DIV/0!	#DIV/0!	#DIV/0!	Core
0	0	0	0	0	0	0	0	0	0	0	0	0	0	#DIV/0!	#DIV/0!	#DIV/0!	Core
0	0	0	0	0	0	0	0	0	0	0	0	0	0	#DIV/0!	#DIV/0!	#DIV/0!	Core
0	0	0	0	0	0	0	0	0	0	0	0	0	0	#DIV/0!	#DIV/0!	#DIV/0!	Core
0	0	0	0	0	0	0	0	0	0	0	0	0	0	#DIV/0!	#DIV/0!	#DIV/0!	Core
0	0	0	0	0	0	0	0	0	0	0	0	0	0	#DIV/0!	#DIV/0!	#DIV/0!	Core
0	0	0	0	0	0	0	0	0	0	0	0	0	0	#DIV/0!	#DIV/0!	#DIV/0!	Core
0	0	0	0	0	0	0	0	0	0	0	0	0	0	#DIV/0!	#DIV/0!	#DIV/0!	Core
0	0	0	0	0	0	0	0	0	0	0	0	0	0	#DIV/0!	#DIV/0!	#DIV/0!	Core
0	0	0	0	0	0	0	0	0	0	0	0	0	0	#DIV/0!	#DIV/0!	#DIV/0!	Core
0	0	0	0	0	0	0	0	0	0	0	0	0	0	#DIV/0!	#DIV/0!	#DIV/0!	Core
0	0	0	0	0	0	0	0	0	0	0	0	0	0	#DIV/0!	#DIV/0!	#DIV/0!	Core
0	0	0	0	0	0	0	0	0	0	0	0	0	0	#DIV/0!	#DIV/0!	#DIV/0!	Core
0	0	0	0	0	0	0	0	0	0	0	0	0	0	#DIV/0!	#DIV/0!	#DIV/0!	Core
0	0	0	0	0	0	0	0	0	0	0	0	0	0	#DIV/0!	#DIV/0!	#DIV/0!	Core
0	0	0	0	0	0	0	0	0	0	0	0	0	0	#DIV/0!	#DIV/0!	#DIV/0!	Core
0	0	0	0	0	0	0	0	0	0	0	0	0	0	#DIV/0!	#DIV/0!	#DIV/0!	Core
0	0	0	0	0	0	0	0	0	0	0	0	0	0	#DIV/0!	#DIV/0!	#DIV/0!	Core
0	0	0	0	0	0	0	0	0	0	0	0	0	0	#DIV/0!	#DIV/0!	#DIV/0!	Core
0	0	0	0	0	0	0	0	0	0	0	0	0	0	#DIV/0!	#DIV/0!	#DIV/0!	Core
0	0	0	0	0	0	0	0	0	0	0	0	0	0	#DIV/0!	#DIV/0!	#DIV/0!	Core
0	0	0	0	0	0	0	0	0	0	0	0	0	0	#DIV/0!	#DIV/0!	#DIV/0!	Core
0	0	0	0	0	0	0	0	0	0	0	0	0	0	#DIV/0!	#DIV/0!	#DIV/0!	Core
0	0	0	0	0	0	0	0	0	0	0	0	0	0	#DIV/0!	#DIV/0!	#DIV/0!	Core
0	0	0	0	0	0	0	0	0	0	0	0	0	0	#DIV/0!	#DIV/0!	#DIV/0!	Core
0	0	0	0	0	0	0	0	0	0	0	0	0	0	#DIV/0!	#DIV/0!	#DIV/0!	Core
0	0	0	0	0	0	0	0	0	0	0	0	0	0	#DIV/0!	#DIV/0!	#DIV/0!	Core
0	0	0	0	0	0	0	0	0	0	0	0	0	0	#DIV/0!	#DIV/0!	#DIV/0!	Core
0	0	0	0	0	0	0	0	0	0	0	0	0	0	#DIV/0!	#DIV/0!	#DIV/0!	Core
0	0	0	0	0	0	0	0	0	0	0	0	0	0	#DIV/0!	#DIV/0!	#DIV/0!	Core
0	0	0	0	0	0	0	0	0	0	0	0	0	0	#DIV/0!	#DIV/0!	#DIV/0!	Core
0	0	0	0	0	0	0	0	0	0	0	0	0	0	#DIV/0!	#DIV/0!	#DIV/0!	Core
0	0	0	0	0	0	0	0	0	0	0	0	0	0	#DIV/0!	#DIV/0!	#DIV/0!	Core
0	0	0	0	0	0	0	0	0	0	0	0	0	0	#DIV/0!	#DIV/0!	#DIV/0!	Core
0	0	0	0	0	0	0	0	0	0	0	0	0	0	#DIV/0!	#DIV/0!	#DIV/0!	Core
0	0	0	0	0	0	0	0	0	0	0	0	0	0	#DIV/0!	#DIV/0!	#DIV/0!	Core
0	0	0	0	0	0	0	0	0	0	0	0	0	0	#DIV/0!	#DIV/0!	#DIV/0!	Core
0	0	0	0	0	0	0	0	0	0	0	0	0	0	#DIV/0!	#DIV/0!	#DIV/0!	Core
0	0	0	0	0	0	0	0	0	0	0	0	0	0	#DIV/0!	#DIV/0!	#DIV/0!	Core
0	0	0	0	0	0	0	0	0	0	0	0	0	0	#DIV/0!	#DIV/0!	#DIV/0!	Core
0	0	0	0	0	0	0	0	0	0	0	0	0	0	#DIV/0!	#DIV/0!	#DIV/0!	Core
0	0	0	0	0	0	0	0	0	0	0	0	0	0	#DIV/0!	#DIV/0!	#DIV/0!	Core
0	0	0	0	0	0	0	0	0	0	0	0	0	0	#DIV/0!	#DIV/0!	#DIV/0!	Core
0	0	0	0	0	0	0	0	0	0	0	0	0	0	#DIV/0!	#DIV/0!	#DIV/0!	Core
0	0	0	0	0	0	0	0	0	0	0	0	0	0	#DIV/0!	#DIV/0!	#DIV/0!	Core
0	0	0	0	0	0	0	0	0	0	0	0	0	0	#DIV/0!	#DIV/0!	#DIV/0!	Core
0	0	0	0	0	0	0	0	0	0	0	0	0	0	#DIV/0!	#DIV/0!	#DIV/0!	Core
0	0	0	0	0	0	0	0	0	0	0	0	0	0	#DIV/0!	#DIV/0!	#DIV/0!	Core
0	0	0	0	0	0	0	0	0	0	0	0	0	0	#DIV/0!	#DIV/0!	#DIV/0!	Core
0	0	0	0	0	0	0	0	0	0	0	0	0	0	#DIV/0!	#DIV/0!	#DIV/0!	Core
0	0	0	0	0	0	0	0	0	0	0	0	0	0	#DIV/0!	#DIV/0!	#DIV/0!	Core
0	0	0	0	0	0	0	0	0	0	0	0	0	0	#DIV/0!	#DIV/0!	#DIV/0!	Core
0	0	0	0	0	0	0	0	0	0	0	0	0	0	#DIV/0!	#DIV/0!	#DIV/0!	Core
0	0	0	0	0	0	0	0	0	0	0	0	0	0	#DIV/0!	#DIV/0!	#DIV/0!	Core
0	0	0	0	0	0	0	0	0	0	0	0	0	0	#DIV/0!	#DIV/0!	#DIV/0!	Core
0	0	0	0	0	0	0	0	0	0	0	0	0	0	#DIV/0!	#DIV/0!	#DIV/0!	Core
0	0	0	0	0	0	0	0	0	0	0	0	0	0	#DIV/0!	#DIV/0!	#DIV/0!	Core
0	0	0	0	0	0	0	0	0	0	0	0	0	0	#DIV/0!	#DIV/0!	#DIV/0!	Core
0	0	0	0	0	0	0	0	0	0	0	0	0	0	#DIV/0!	#DIV/0!	#DIV/0!	Core
0	0	0	0	0	0	0	0	0	0	0	0	0	0	#DIV/0!	#DIV/0!	#DIV/0!	Core
0	0	0	0	0	0	0	0	0	0	0	0	0	0	#DIV/0!	#DIV/0!	#DIV/0!	Core
0	0	0	0	0	0	0	0	0	0	0	0	0	0	#DIV/0!	#DIV/0!	#DIV/0!	Core
0	0	0	0	0	0	0	0	0	0	0	0	0	0	#DIV/0!	#DIV/0!	#DIV/0!	Core
0	0	0	0	0	0	0	0	0	0	0	0	0	0	#DIV/0!	#DIV/0!	#DIV/0!	Core
0	0	0	0	0	0	0	0	0	0	0	0	0	0	#DIV/0!	#DIV/0!	#DIV/0!	Core
0	0	0	0	0	0	0	0	0	0	0	0	0	0	#DIV/0!	#DIV/0!	#DIV/0!	Core
0	0	0	0	0	0	0	0	0	0	0	0	0	0	#DIV/0!	#DIV/0!	#DIV/0!	Core
0	0	0	0	0	0	0	0	0	0	0	0	0	0	#DIV/0!	#DIV/0!	#DIV/0!	Core
0	0	0	0	0	0	0	0	0	0	0	0	0	0	#DIV/0!	#DIV/0!	#DIV/0!	Core
0	0	0	0	0	0	0	0	0	0	0	0	0	0	#DIV/0!	#DIV/0!	#DIV/0!	Core
0	0	0	0	0	0	0	0	0	0	0	0	0	0	#DIV/0!	#DIV/0!	#DIV/0!	Core
0	0	0	0	0	0	0	0	0	0	0	0	0	0	#DIV/0!	#DIV/0!	#DIV/0!	Core
0	0	0	0	0	0	0	0	0	0	0	0	0	0	#DIV/0!	#DIV/0!	#DIV/0!	Core
0	0	0	0	0	0	0	0	0	0	0	0	0	0	#DIV/0!	#DIV/0!	#DIV/0!	Core
0	0	0	0	0	0	0	0	0	0	0	0	0	0	#DIV/0!	#DIV/0!	#DIV/0!	Core
0	0	0	0	0	0	0	0	0	0	0	0	0	0	#DIV/0!	#DIV/0!	#DIV/0!	Core
0	0	0	0	0	0	0	0	0	0	0	0	0	0	#DIV/0!	#DIV/0!	#DIV/0!	Core
0	0	0	0	0	0	0	0	0	0	0	0	0	0	#DIV/0!	#DIV/0!	#DIV/0!	Core
0	0	0	0	0	0	0	0	0	0	0	0	0	0	#DIV/0!	#DIV/0!	#DIV/0!	Core
0	0	0	0	0	0	0	0	0	0	0	0	0	0	#DIV/0!	#DIV/0!	#DIV/0!	Core
0	0	0	0	0	0	0	0	0	0	0	0	0	0	#DIV/0!	#DIV/0!	#DIV/0!	Core
0	0	0	0	0	0	0	0	0	0	0	0	0	0	#DIV/0!	#DIV/0!	#DIV/0!	Core
0	0	0	0	0	0	0	0	0	0	0	0	0	0	#DIV/0!	#DIV/0!	#DIV/0!	Core
0	0	0	0	0	0	0	0	0	0	0	0	0	0	#DIV/0!	#DIV/0!	#DIV/0!	Core
0	0	0	0	0	0	0	0	0	0	0	0	0	0	#DIV/0!	#DIV/0!	#DIV/0!	Core
0	0	0	0	0	0	0	0	0	0	0	0	0	0	#DIV/0!	#DIV/0!	#DIV/0!	Core
0	0	0	0	0	0	0	0	0	0	0	0	0	0	#DIV/0!	#DIV/0!	#DIV/0!	Core
0	0	0	0	0	0	0	0	0	0	0	0	0	0	#DIV/0!	#DIV/0!	#DIV/0!	Core
0	0	0	0	0	0	0	0	0	0	0	0	0	0	#DIV/0!	#DIV/0!	#DIV/0!	Core
0	0	0	0	0	0	0	0	0	0	0	0	0	0	#DIV/0!	#DIV/0!	#DIV/0!	Core
0	0	0	0	0	0	0	0	0	0	0	0	0	0	#DIV/0!	#DIV/0!	#DIV/0!	Core
0	0	0	0	0	0	0	0	0	0	0	0	0	0	#DIV/0!	#DIV/0!	#DIV/0!	Core
0	0	0	0	0	0	0	0	0	0	0	0	0	0	#DIV/0!	#DIV/0!	#DIV/0!	Core
0	0	0	0	0	0	0	0	0	0	0	0	0	0	#DIV/0!	#DIV/0!	#DIV/0!	Core
0	0	0	0	0	0	0	0	0	0	0	0	0	0	#DIV/0!	#DIV/0!	#DIV/0!	Core
0	0	0	0	0	0	0	0	0	0	0	0	0	0	#DIV/0!	#DIV/0!	#DIV/0!	Core
0	0	0	0	0	0	0	0	0	0	0	0	0	0	#DIV/0!	#DIV/0!	#DIV/0!	Core
0	0	0	0	0	0	0	0	0	0	0	0	0	0	#DIV/0!	#DIV/0!	#DIV/0!	Core
0	0	0	0	0	0	0	0	0	0	0	0	0	0	#DIV/0!	#DIV/0!	#DIV/0!	Core
0	0	0	0	0	0	0	0	0	0	0	0	0	0	#DIV/0!	#DIV/0!	#DIV/0!	Core
0	0	0	0	0	0	0	0	0	0	0	0	0	0	#DIV/0!	#DIV/0!	#DIV/0!	Core
0	0	0	0	0	0	0	0	0	0	0	0	0	0	#DIV/0!	#DIV/0!	#DIV/0!	Core
0	0	0	0	0	0	0	0	0	0	0	0	0	0	#DIV/0!	#DIV/0!	#DIV/0!	Core
0	0	0	0	0	0	0	0	0	0	0	0	0	0	#DIV/0!	#DIV/0!	#DIV/0!	Core
0	0	0	0	0	0	0	0	0	0	0	0	0	0	#DIV/0!	#DIV/0!	#DIV/0!	Core
0	0	0	0	0	0	0	0	0	0	0	0	0	0	#DIV/0!	#DIV/0!	#DIV/0!	Core
0	0	0	0	0	0	0	0	0	0	0	0	0	0	#DIV/0!	#DIV/0!	#DIV/0!	Core
0	0	0	0	0	0	0	0	0	0	0	0	0	0	#DIV/0!	#DIV/0!	#DIV/0!	Core
0	0	0	0	0	0	0	0	0	0	0	0	0	0	#DIV/0!	#DIV/0!	#DIV/0!	Core
0	0	0	0	0	0	0	0	0	0	0	0	0	0	#DIV/0!	#DIV/0!	#DIV/0!	Core
0	0	0	0	0	0	0	0	0	0	0	0	0	0	#DIV/0!	#DIV/0!	#DIV/0!	Core
0	0	0	0	0	0	0	0	0	0	0	0	0	0	#DIV/0!	#DIV/0!	#DIV/0!	Core
0	0	0	0	0	0	0	0	0	0	0	0	0	0	#DIV/0!	#DIV/0!	#DIV/0!	Core
0	0	0	0	0	0	0	0	0	0	0	0	0	0	#DIV/0!	#DIV/0!	#DIV/0!	Core
0	0	0	0	0	0	0	0	0	0	0	0	0	0	#DIV/0!	#DIV/0!	#DIV/0!	Core
0	0	0	0	0	0	0	0	0	0	0	0	0	0	#DIV/0!	#DIV/0!	#DIV/0!	Core
0	0	0	0	0	0	0	0	0	0	0	0	0	0	#DIV/0!	#DIV/0!	#DIV/0!	Core
0	0	0	0	0	0	0	0	0	0	0	0	0	0	#DIV/0!	#DIV/0!	#DIV/0!	Core
0	0	0	0	0	0	0	0	0	0	0	0	0	0	#DIV/0!	#DIV/0!	#DIV/0!	Core
0	0	0	0	0	0	0	0	0	0	0	0	0	0	#DIV/0!	#DIV/0!	#DIV/0!	Core
0	0	0	0	0	0	0	0	0	0	0	0	0	0	#DIV/0!	#DIV/0!	#DIV/0!	Core
0	0	0	0	0	0	0	0	0	0	0	0	0	0	#DIV/0!	#DIV/0!	#DIV/0!	Core
0	0	0	0	0	0	0	0	0	0	0	0	0	0	#DIV/0!	#DIV/0!	#DIV/0!	Core
0	0	0	0	0	0	0	0	0	0	0	0	0	0	#DIV/0!	#DIV/0!	#DIV/0!	Core
0	0	0	0	0	0	0	0	0	0	0	0	0	0	#DIV/0!	#DIV/0!	#DIV/0!	Core
0	0	0	0	0	0	0	0	0	0	0	0	0	0	#DIV/0!	#DIV/0!	#DIV/0!	Core
0	0	0	0	0	0	0	0	0	0	0	0	0	0	#DIV/0!	#DIV/0!	#DIV/0!	Core
0	0	0	0	0	0	0	0	0	0	0	0	0	0	#DIV/0!	#DIV/0!	#DIV/0!	Core
0	0	0	0	0	0	0	0	0	0	0	0	0	0	#DIV/0!	#DIV/0!	#DIV/0!	Core
0	0	0	0	0	0	0	0	0	0	0	0	0	0	#DIV/0!	#DIV/0!	#DIV/0!	Core
0	0	0	0	0	0	0	0	0	0	0	0	0	0	#DIV/0!	#DIV/0!	#DIV/0!	Core
0	0	0	0	0	0	0	0	0	0	0	0	0	0	#DIV/0!	#DIV/0!	#DIV/0!	Core
0	0	0	0	0	0	0	0	0	0	0	0	0	0	#DIV/0!	#DIV/0!	#DIV/0!	Core
0	0	0	0	0	0	0	0	0	0	0	0	0	0	#DIV/0!	#DIV/0!	#DIV/0!	Core
0	0	0	0	0	0	0	0	0	0	0	0	0	0	#DIV/0!	#DIV/0!	#DIV/0!	Core
0	0	0	0	0	0	0	0	0	0	0	0	0	0	#DIV/0!	#DIV/0!	#DIV/0!	Core
0	0	0	0	0	0	0	0	0	0	0	0	0	0	#DIV/0!	#DIV/0!	#DIV/0!	Core
0	0	0	0	0	0	0	0	0	0	0	0	0	0	#DIV/0!	#DIV/0!	#DIV/0!	Core
0	0	0	0	0	0	0	0	0	0	0	0	0	0	#DIV/0!	#DIV/0!	#DIV/0!	Core
0	0	0	0	0	0	0	0	0	0	0	0	0	0	#DIV/0!	#DIV/0!	#DIV/0!	Core
0	0	0	0	0	0	0	0	0	0	0	0	0	0	#DIV/0!	#DIV/0!	#DIV/0!	Core
0	0	0	0	0	0	0	0	0	0	0	0	0	0	#DIV/0!	#DIV/0!	#DIV/0!	Core
0	0	0	0	0	0	0	0	0	0	0	0	0	0	#DIV/0!	#DIV/0!	#DIV/0!	Core
0	0	0	0	0	0	0	0	0	0	0	0	0	0	#DIV/0!	#DIV/0!	#DIV/0!	Core
0	0	0	0	0	0	0	0	0	0	0	0	0	0	#DIV/0!	#DIV/0!	#DIV/0!	Core
0	0	0	0	0	0	0	0	0	0	0	0	0	0	#DIV/0!	#DIV/0!	#DIV/0!	Core
0	0	0	0	0	0	0	0	0	0	0	0	0	0	#DIV/0!	#DIV/0!	#DIV/0!	Core
0	0	0	0	0	0	0	0	0	0	0	0	0	0	#DIV/0!	#DIV/0!	#DIV/0!	Core
0	0	0	0	0	0	0	0	0	0	0	0	0	0	#DIV/0!	#DIV/0!	#DIV/0!	Core
0	0	0	0	0	0	0	0	0	0	0	0	0	0	#DIV/0!	#DIV/0!	#DIV/0!	Core
0	0	0	0	0	0	0	0	0	0	0	0	0	0	#DIV/0!	#DIV/0!	#DIV/0!	Core
0	0	0	0	0	0	0	0	0	0	0	0	0	0	#DIV/0!	#DIV/0!	#DIV/0!	Core
0	0	0	0	0	0	0	0	0	0	0	0	0	0	#DIV/0!	#DIV/0!	#DIV/0!	Core
0	0	0	0	0	0	0	0	0	0	0	0	0	0	#DIV/0!	#DIV/0!	#DIV/0!	Core
0	0	0	0	0	0	0	0	0	0	0	0	0	0	#DIV/0!	#DIV/0!	#DIV/0!	Core
0	0	0	0	0	0	0	0	0	0	0	0	0	0	#DIV/0!	#DIV/0!	#DIV/0!	Core
0	0	0	0	0	0	0	0	0	0	0	0	0	0	#DIV/0!	#DIV/0!	#DIV/0!	Core
0	0	0	0	0	0	0	0	0	0	0	0	0	0	#DIV/0!	#DIV/0!	#DIV/0!	Core
0	0	0	0	0	0	0	0	0	0	0	0	0	0	#DIV/0!	#DIV/0!	#DIV/0!	Core
0	0	0	0	0	0	0	0	0	0	0	0	0	0	#DIV/0!	#DIV/0!	#DIV/0!	Core
0	0	0	0	0	0	0	0	0	0	0	0	0	0	#DIV/0!	#DIV/0!	#DIV/0!	Core
0	0	0	0	0	0	0	0	0	0	0	0	0	0	#DIV/0!	#DIV/0!	#DIV/0!	Core
0	0	0	0	0	0	0	0	0	0	0	0	0	0	#DIV/0!	#DIV/0!	#DIV/0!	Core
0	0	0	0	0	0	0	0	0	0	0	0	0	0	#DIV/0!	#DIV/0!	#DIV/0!	Core
0	0	0	0	0	0	0	0	0	0	0	0	0	0	#DIV/0!	#DIV/0!	#DIV/0!	Core
0	0	0	0	0	0	0	0	0	0	0	0	0	0	#DIV/0!	#DIV/0!	#DIV/0!	Core
0	0	0	0	0	0	0	0	0	0	0	0	0	0	#DIV/0!	#DIV/0!	#DIV/0!	Core
0	0	0	0	0	0	0	0	0	0	0	0	0	0	#DIV/0!	#DIV/0!	#DIV/0!	Core
0	0	0	0	0	0	0	0	0	0	0	0	0	0	#DIV/0!	#DIV/0!	#DIV/0!	Core
0	0	0	0	0	0	0	0	0	0	0	0	0	0	#DIV/0!	#DIV/0!	#DIV/0!	Core
0	0	0	0	0	0	0	0	0	0	0	0	0	0	#DIV/0!	#DIV/0!	#DIV/0!	Core
0	0	0	0	0	0	0	0	0	0	0	0	0	0	#DIV/0!	#DIV/0!	#DIV/0!	Core
0	0	0	0	0	0	0	0	0	0	0	0	0	0	#DIV/0!	#DIV/0!	#DIV/0!	Core
0	0	0	0	0	0	0	0	0	0	0	0	0	0	#DIV/0!	#DIV/0!	#DIV/0!	Core
0	0	0	0	0	0	0	0	0	0	0	0	0	0	#DIV/0!	#DIV/0!	#DIV/0!	Core
0	0	0	0	0	0	0	0	0	0	0	0	0	0	#DIV/0!	#DIV/0!	#DIV/0!	Core
0	0	0	0	0	0	0	0	0	0	0	0	0	0	#DIV/0!	#DIV/0!	#DIV/0!	Core
0	0	0	0	0	0	0	0	0	0	0	0	0	0	#DIV/0!	#DIV/0!	#DIV/0!	Core
0	0	0	0	0	0	0	0	0	0	0	0	0	0	#DIV/0!	#DIV/0!	#DIV/0!	Core
0	0	0	0	0	0	0	0	0	0	0	0	0	0	#DIV/0!	#DIV/0!	#DIV/0!	Core
0	0	0	0	0	0	0	0	0	0	0	0	0	0	#DIV/0!	#DIV/0!	#DIV/0!	Core
0	0	0	0	0	0	0	0	0	0	0	0	0	0	#DIV/0!	#DIV/0!	#DIV/0!	Core
0	0	0	0	0	0	0	0	0	0	0	0	0	0	#DIV/0!	#DIV/0!	#DIV/0!	Core
0	0	0	0	0	0	0	0	0	0	0	0	0	0	#DIV/0!	#DIV/0!	#DIV/0!	Core
0	0	0	0	0	0	0	0	0	0	0	0	0	0	#DIV/0!	#DIV/0!	#DIV/0!	Core
0	0	0	0	0	0	0	0	0	0	0	0	0	0	#DIV/0!	#DIV/0!	#DIV/0!	Core
0	0	0	0	0	0	0	0	0	0	0	0	0	0	#DIV/0!	#DIV/0!	#DIV/0!	Core
0	0	0	0	0	0	0	0	0	0	0	0	0	0	#DIV/0!	#DIV/0!	#DIV/0!	Core
0	0	0	0	0	0	0	0	0	0	0	0	0	0	#DIV/0!	#DIV/0!	#DIV/0!	Core
0	0	0	0	0	0	0	0	0	0	0	0	0	0	#DIV/0!	#DIV/0!	#DIV/0!	Core
0	0	0	0	0	0	0	0	0	0	0	0	0	0	#DIV/0!	#DIV/0!	#DIV/0!	Core
0	0	0	0	0	0	0	0	0	0	0	0	0	0	#DIV/0!	#DIV/0!	#DIV/0!	Core
0	0	0	0	0	0	0	0	0	0	0	0	0	0	#DIV/0!	#DIV/0!	#DIV/0!	Core
0	0	0	0	0	0	0	0	0	0	0	0	0	0	#DIV/0!	#DIV/0!	#DIV/0!	Core
0	0	0	0	0	0	0	0	0	0	0	0	0	0	#DIV/0!	#DIV/0!	#DIV/0!	Core
0	0	0	0	0	0	0	0	0	0	0	0	0	0	#DIV/0!	#DIV/0!	#DIV/0!	Core
0	0	0	0	0	0	0	0	0	0	0	0	0	0	#DIV/0!	#DIV/0!	#DIV/0!	Core
0	0	0	0	0	0	0	0	0	0	0	0	0	0	#DIV/0!	#DIV/0!	#DIV/0!	Core
0	0	0	0	0	0	0	0	0	0	0	0	0	0	#DIV/0!	#DIV/0!	#DIV/0!	Core
0	0	0	0	0	0	0	0	0	0	0	0	0	0	#DIV/0!	#DIV/0!	#DIV/0!	Core
0	0	0	0	0	0	0	0	0	0	0	0	0	0	#DIV/0!	#DIV/0!	#DIV/0!	Core
0	0	0	0	0	0	0	0	0	0	0	0	0	0	#DIV/0!	#DIV/0!	#DIV/0!	Core
0	0	0	0	0	0	0	0	0	0	0	0	0	0	#DIV/0!	#DIV/0!	#DIV/0!	Core
0	0	0	0	0	0	0	0	0	0	0	0	0	0	#DIV/0!	#DIV/0!	#DIV/0!	Core
0	0	0	0	0	0	0	0	0	0	0	0	0	0	#DIV/0!	#DIV/0!	#DIV/0!	Core
0	0	0	0	0	0	0	0	0	0	0	0	0	0	#DIV/0!	#DIV/0!	#DIV/0!	Core
0	0	0	0	0	0	0	0	0	0	0	0	0	0	#DIV/0!	#DIV/0!	#DIV/0!	Core
0	0	0	0	0	0	0	0	0	0	0	0	0	0	#DIV/0!	#DIV/0!	#DIV/0!	Core
0	0	0	0	0	0	0	0	0	0	0	0	0	0	#DIV/0!	#DIV/0!	#DIV/0!	Core
0	0	0	0	0	0	0	0	0	0	0	0	0	0	#DIV/0!	#DIV/0!	#DIV/0!	Core
0	0	0	0	0	0	0	0	0	0	0	0	0	0	#DIV/0!	#DIV/0!	#DIV/0!	Core
0	0	0	0	0	0	0	0	0	0	0	0	0	0	#DIV/0!	#DIV/0!	#DIV/0!	Core
0	0	0	0	0	0	0	0	0	0	0	0	0	0	#DIV/0!	#DIV/0!	#DIV/0!	Core
0	0	0	0	0	0	0	0	0	0	0	0	0	0	#DIV/0!	#DIV/0!	#DIV/0!	Core
0	0	0	0	0	0	0	0	0	0	0	0	0	0	#DIV/0!	#DIV/0!	#DIV/0!	Core
0	0	0	0	0	0	0	0	0	0	0	0	0	0	#DIV/0!	#DIV/0!	#DIV/0!	Core
0	0	0	0	0	0	0	0	0	0	0	0	0	0	#DIV/0!	#DIV/0!	#DIV/0!	Core
0	0	0	0	0	0	0	0	0	0	0	0	0	0	#DIV/0!	#DIV/0!	#DIV/0!	Core
0	0	0	0	0	0	0	0	0	0	0	0	0	0	#DIV/0!	#DIV/0!	#DIV/0!	Core
0	0	0	0	0	0	0	0	0	0	0	0	0	0	#DIV/0!	#DIV/0!	#DIV/0!	Core
0	0	0	0	0	0	0	0	0	0	0	0	0	0	#DIV/0!	#DIV/0!	#DIV/0!	Core
0	0	0	0	0	0	0	0	0	0	0	0	0	0	#DIV/0!	#DIV/0!	#DIV/0!	Core
0	0	0	0	0	0	0	0	0	0	0	0	0	0	#DIV/0!	#DIV/0!	#DIV/0!	Core
0	0	0	0	0	0	0	0	0	0	0	0	0	0	#DIV/0!	#DIV/0!	#DIV/0!	Core
0	0	0	0	0	0	0	0	0	0	0	0	0	0	#DIV/0!	#DIV/0!	#DIV/0!	Core
0	0	0	0	0	0	0	0	0	0	0	0	0	0	#DIV/0!	#DIV/0!	#DIV/0!	Core
0	0	0	0	0	0	0	0	0	0	0	0	0	0	#DIV/0!	#DIV/0!	#DIV/0!	Core
0	0	0	0	0	0	0	0	0	0	0	0	0	0	#DIV/0!	#DIV/0!	#DIV/0!	Core
0	0	0	0	0	0	0	0	0	0	0	0	0	0	#DIV/0!	#DIV/0!	#DIV/0!	Core
0	0	0	0	0	0	0	0	0	0	0	0	0	0	#DIV/0!	#DIV/0!	#DIV/0!	Core
0	0	0	0	0	0	0	0	0	0	0	0	0	0	#DIV/0!	#DIV/0!	#DIV/0!	Core
0	0	0	0	0	0	0	0	0	0	0	0	0	0	#DIV/0!	#DIV/0!	#DIV/0!	Core
0	0	0	0	0	0	0	0	0	0	0	0	0	0	#DIV/0!	#DIV/0!	#DIV/0!	Core
0	0	0	0	0	0	0	0	0	0	0	0	0	0	#DIV/0!	#DIV/0!	#DIV/0!	Core
0	0	0	0	0	0	0	0	0	0	0	0	0	0	#DIV/0!	#DIV/0!	#DIV/0!	Core
0	0	0	0	0	0	0	0	0	0	0	0	0	0	#DIV/0!	#DIV/0!	#DIV/0!	Core
0	0	0	0	0	0	0	0	0	0	0	0	0	0	#DIV/0!	#DIV/0!	#DIV/0!	Core
0	0	0	0	0	0	0	0	0	0	0	0	0	0	#DIV/0!	#DIV/0!	#DIV/0!	Core

## Sheet: S2. U-Pb Chil2
Sample Name: Chilhowee Group		617178	3744467					207/235		206/238		207/206		Best age
Grain #	[U] ppm	U/Th	207/235	2σ error	206/238	2σ error	RHO	Age Ma	2σ error	Age (Ma)	2σ error	Age (Ma)	2σ error	(Ma)	2σ error	% Discordance*	Th/U
Chil2-12	1074	0.2203	2.143	0.077	0.1556	0.0042	0	1153	24	931	24	1566	37	931	24	19.2541	4.53926
Chil2-85	1534	0.473	2.173	0.073	0.1612	0.005	0	1163	24	961	28	1588	30	961	28	17.3689	2.11416
Chil2b.88	138	0.493	12.16	0.58	0.47	0.021	0	2601	45	2462	91	2715	55	2715	55	9.3186	2.0284
Chil2b.69	354	0.53	1.331	0.049	0.1295	0.0033	0	855	21	784	19	1030	72	784	19	8.30409	1.88679
Chil2b.108	1420	0.538	1.9	0.12	0.1445	0.0085	0	1050	42	863	48	1499	45	863	48	17.8095	1.85874
Chil2-103	424	0.574	2.228	0.068	0.1755	0.0045	0	1182	21	1041	24	1468	51	1041	24	11.9289	1.74216
Chil2b.128	1620	0.58	2.43	0.2	0.182	0.014	0	1185	62	1062	73	1468	50	1062	73	10.3797	1.72414
Chil2b.91	1540	0.592	1.6	0.12	0.1283	0.0085	0	932	47	772	48	1396	46	772	48	17.1674	1.68919
Chil2b.120	212	0.598	2.66	0.12	0.2083	0.0067	0	1298	34	1216	36	1407	91	1407	91	13.575	1.67224
Chil2-73	1060	0.599	1.764	0.061	0.1534	0.0046	0	1033	21	919	26	1274	37	919	26	11.0358	1.66945
Chil2b.85	1123	0.604	2.408	0.079	0.1895	0.0061	0	1242	23	1118	33	1413	63	1118	33	9.9839	1.65563
Chil2-17	247	0.605	11.49	0.29	0.4427	0.0098	0	2558	23	2358	44	2707	31	2707	31	12.8925	1.65289
Chil2-76	2360	0.606	1.24	0.11	0.1045	0.0093	0	780	49	633	54	1332	38	633	54	18.8462	1.65017
Chil2b.76	537	0.606	1.772	0.044	0.1397	0.0032	0	1031	16	842	18	1454	43	842	18	18.3317	1.65017
Chil2b.127	1630	0.616	2.03	0.097	0.1605	0.0071	0	1106	34	955	40	1435	37	955	40	13.6528	1.62338
Chil2-118	242	0.639	3.07	0.11	0.2328	0.0054	0	1418	27	1347	28	1506	57	1506	57	10.5578	1.56495
Chil2b.96	62	0.673	2.23	0.18	0.187	0.01	0	1140	56	1106	55	1220	150	1106	55	2.98246	1.48588
Chil2b.45	193	0.682	11.94	0.25	0.479	0.0097	0	2594	20	2526	40	2647	29	2647	29	4.57121	1.46628
Chil2-110	379	0.688	1.604	0.057	0.1441	0.0032	0	964	22	870	19	1201	56	870	19	9.75104	1.45349
Chil2b.94	255	0.737	2.742	0.079	0.2148	0.0046	0	1332	22	1253	24	1462	57	1462	57	14.2955	1.35685
Chil2b.101	444	0.775	3.148	0.088	0.2531	0.0056	0	1436	22	1452	29	1416	43	1416	43	2.54237	1.29032
Chil2b.109	2860	0.776	1.85	0.13	0.155	0.011	0	1027	45	923	65	1380	47	923	65	10.1266	1.28866
Chil2b.11	594	0.794	2.237	0.075	0.1859	0.0042	0	1183	24	1098	23	1359	51	1098	23	7.18512	1.25945
Chil2b.81	1370	0.8	1.81	0.18	0.14	0.013	0	977	64	832	74	1447	46	832	74	14.8414	1.25
Chil2b.100	286	0.8	10.17	0.34	0.441	0.021	0	2445	31	2350	92	2555	63	2555	63	8.02348	1.25
Chil2b.19	800	0.803	2.579	0.095	0.2053	0.0051	0	1291	27	1203	27	1409	61	1409	61	14.6203	1.24533
Chil2-101	528	0.817	9.5	0.19	0.3932	0.0073	0	2382	18	2135	34	2618	23	2618	23	18.4492	1.22399
Chil2b.66	408	0.818	3.02	0.13	0.2407	0.0089	0	1410	36	1390	46	1433	56	1433	56	3.0007	1.22249
Chil2b.78	327	0.825	2.561	0.069	0.202	0.0036	0	1283	20	1185	19	1452	50	1185	19	7.63835	1.21212
Chil2-48	845	0.827	1.936	0.066	0.1587	0.005	0	1088	23	955	28	1343	46	955	28	12.2243	1.20919
Chil2b.77	218	0.832	2.97	0.12	0.2212	0.0055	0	1403	28	1286	29	1594	57	1594	57	19.3225	1.20192
Chil2b.117	622	0.852	1.219	0.076	0.1084	0.0057	0	791	32	660	33	1275	85	660	33	16.5613	1.17371
Chil2-14	539	0.878	3.42	0.12	0.2503	0.0051	0	1498	26	1438	26	1546	40	1546	40	6.98577	1.13895
Chil2b.12	323	0.881	2.42	0.075	0.2009	0.0043	0	1239	24	1179	23	1370	51	1179	23	4.84262	1.13507
Chil2-59	661	0.886	2.471	0.072	0.1851	0.0041	0	1257	21	1093	22	1489	46	1093	22	13.0469	1.12867
Chil2b.87	8.9	0.89	21.4	3	0.556	0.07	0	3130	120	2760	290	3380	180	3380	180	18.3432	1.1236
Chil2-7	1668	0.9	2.534	0.066	0.1933	0.0046	0	1276	18	1138	25	1495	32	1138	25	10.815	1.11111
Chil2-5	1138	0.914	2.356	0.087	0.1965	0.0066	0	1218	26	1153	35	1320	43	1153	35	5.33662	1.09409
Chil2-84	247	0.923	1.923	0.063	0.1493	0.004	0	1084	22	896	23	1511	59	896	23	17.3432	1.08342
Chil2-120	1249	0.955	3.154	0.09	0.2361	0.0065	0	1437	24	1368	34	1578	30	1578	30	13.308	1.04712
Chil2-27	641	0.964	3.24	0.13	0.247	0.011	0	1451	30	1414	55	1515	46	1515	46	6.66667	1.03734
Chil2-92	235	0.972	12.69	0.31	0.4871	0.0088	0	2658	25	2554	38	2739	36	2739	36	6.75429	1.02881
Chil2-29	1500	0.978	1.695	0.06	0.1523	0.0051	0	1004	24	912	29	1197	42	912	29	9.16335	1.02249
Chil2b.03	561	0.98	3.328	0.098	0.2664	0.0059	0	1485	23	1528	30	1446	37	1446	37	5.67082	1.02041
Chil2b.115	94	0.983	3.06	0.16	0.252	0.01	0	1399	43	1443	54	1310	100	1310	100	10.1527	1.01729
Chil2-36	771	0.992	3.505	0.081	0.2493	0.0058	0	1528	18	1432	30	1654	32	1654	32	13.422	1.00806
Chil2-15	1366	0.993	1.566	0.052	0.1489	0.0037	0	950	20	894	21	1060	41	894	21	5.89474	1.00705
Chil2-105	1740	0.996	2.67	0.14	0.1979	0.009	0	1295	41	1158	49	1577	27	1158	49	10.5792	1.00402
Chil2-60	254	1	13.15	0.34	0.485	0.011	0	2687	25	2541	50	2811	44	2811	44	9.60512	1
Chil2b.60	238	1.009	3.96	0.18	0.2846	0.0066	0	1607	33	1612	33	1594	61	1594	61	1.12923	0.99108
Chil2b.50	382	1.014	12.14	0.22	0.4764	0.0074	0	2612	17	2513	31	2702	25	2702	25	6.99482	0.986193
Chil2b.34	125	1.018	13.05	0.39	0.525	0.011	0	2689	21	2725	50	2664	34	2664	34	2.28979	0.982318
Chil2b.63	234	1.028	2.99	0.11	0.2432	0.0059	0	1399	28	1401	31	1391	57	1391	57	0.718907	0.972763
Chil2b.113	1250	1.031	1.43	0.054	0.1266	0.0038	0	896	22	767	21	1197	51	767	21	14.3973	0.969932
Chil2-123	550	1.031	1.913	0.054	0.1743	0.0034	0	1082	19	1035	19	1200	47	1035	19	4.34381	0.969932
Chil2-47	248	1.051	5.05	0.15	0.3184	0.0089	0	1830	27	1777	43	1897	55	1897	55	6.32578	0.951475
Chil2-107	517	1.084	1.989	0.067	0.1798	0.0032	0	1104	22	1065	18	1190	53	1065	18	3.53261	0.922509
Chil2-33	329	1.085	12.72	0.3	0.513	0.012	0	2651	23	2661	52	2630	33	2630	33	1.17871	0.921659
Chil2b.23	720	1.11	2.59	0.11	0.2132	0.008	0	1275	37	1241	43	1354	39	1354	39	8.34564	0.900901
Chil2b.106	182	1.116	2.51	0.12	0.2125	0.0097	0	1259	37	1235	53	1296	86	1296	86	4.70679	0.896057
Chil2-51	129	1.119	10.86	0.34	0.427	0.012	0	2501	30	2284	57	2689	30	2689	30	15.0614	0.893655
Chil2b.71	557	1.12	3.82	0.16	0.2788	0.0089	0	1597	31	1580	45	1576	45	1576	45	0.253807	0.892857
Chil2-116	658	1.128	1.917	0.057	0.1761	0.0039	0	1083	19	1044	22	1183	49	1044	22	3.60111	0.886525
Chil2-66	1320	1.175	1.83	0.12	0.1571	0.0096	0	1019	48	933	54	1251	62	933	54	8.43965	0.851064
Chil2-71	2260	1.181	1.803	0.063	0.1475	0.0062	0	1038	23	884	35	1397	37	884	35	14.8362	0.84674
Chil2b.07	169	1.182	3.19	0.1	0.2517	0.0052	0	1444	25	1445	27	1448	57	1448	57	0.207182	0.846024
Chil2-90	234	1.184	3.372	0.086	0.2646	0.0042	0	1492	20	1512	21	1458	44	1458	44	3.7037	0.844595
Chil2b.124	106	1.206	2.21	0.17	0.1925	0.0075	0	1138	41	1130	41	1100	110	1130	41	0.702988	0.829187
Chil2b.13	131	1.231	11.72	0.32	0.465	0.015	0	2571	27	2491	52	2639	34	2639	34	5.60818	0.812348
Chil2-106	367	1.241	2.632	0.061	0.2286	0.0036	0	1305	17	1326	19	1298	42	1298	42	2.15716	0.805802
Chil2-95	773	1.248	1.753	0.043	0.1619	0.0037	0	1031	17	966	20	1184	42	966	20	6.30456	0.801282
Chil2b.58	475	1.248	10.9	0.29	0.433	0.011	0	2509	23	2310	50	2668	28	2668	28	13.4183	0.801282
Chil2b.140	2710	1.296	2.23	0.067	0.1907	0.0044	0	1187	20	1124	23	1300	56	1124	23	5.3075	0.771605
Chil2b.61	124	1.297	12.4	0.37	0.485	0.012	0	2627	28	2543	54	2701	32	2701	32	5.84969	0.77101
Chil2-34	302	1.328	2.878	0.098	0.2294	0.0074	0	1372	26	1333	38	1455	48	1455	48	8.38488	0.753012
Chil2b.43	98.8	1.332	14.29	0.63	0.559	0.021	0	2766	43	2885	80	2682	42	2682	42	7.56898	0.750751
Chil2b.26	172	1.346	0.773	0.059	0.0819	0.0035	0	569	32	506	21	770	150	506	21	11.0721	0.742942
Chil2-2	573	1.353	12.11	0.24	0.4669	0.0094	0	2607	19	2465	41	2695	25	2695	25	8.53432	0.739098
Chil2b.70	596	1.36	3.71	0.15	0.2689	0.0081	0	1566	31	1530	42	1627	58	1627	58	5.96189	0.735294
Chil2-30	406	1.383	12.95	0.25	0.516	0.01	0	2670	19	2684	46	2654	32	2654	32	1.13037	0.723066
Chil2b.125	675	1.389	2.771	0.085	0.2317	0.0066	0	1338	23	1346	36	1324	49	1324	49	1.66163	0.719942
Chil2b.35	29.8	1.398	3.91	0.3	0.297	0.01	0	1585	61	1678	49	1440	150	1440	150	16.5278	0.715308
Chil2-58	788	1.407	1.984	0.05	0.1517	0.0031	0	1110	17	910	17	1497	35	910	17	18.018	0.710732
Chil2-113	1309	1.43	3.217	0.075	0.2491	0.0051	0	1458	19	1432	26	1516	22	1516	22	5.5409	0.699301
Chil2b.02	432	1.441	10.61	0.53	0.417	0.02	0	2455	56	2245	95	2679	29	2679	29	16.2001	0.693963
Chil2-56	1142	1.465	1.831	0.043	0.1704	0.0031	0	1052	16	1014	17	1125	38	1014	17	3.61217	0.682594
Chil2b.21	923	1.482	2.15	0.067	0.1886	0.0052	0	1157	22	1112	28	1265	33	1112	28	3.88937	0.674764
Chil2b.53	487	1.504	4.21	0.1	0.2899	0.0093	0	1672	19	1635	44	1746	43	1746	43	6.35739	0.664894
Chil2b.130	104.8	1.517	2.27	0.19	0.1713	0.0082	0	1160	58	1014	46	1490	160	1014	46	12.5862	0.659196
Chil2-100	799	1.523	3.263	0.079	0.2416	0.0048	0	1467	19	1393	25	1587	34	1587	34	12.2243	0.656599
Chil2b.137	11800	1.541	2.39	0.19	0.179	0.013	0	1178	60	1046	73	1499	32	1046	73	11.2054	0.648929
Chil2b.17	625	1.545	3.202	0.069	0.2557	0.0045	0	1456	18	1471	22	1452	39	1452	39	1.30854	0.647249
Chil2-49	353	1.56	3.05	0.1	0.2406	0.0064	0	1411	25	1391	32	1444	41	1444	41	3.67036	0.641026
Chil2b.75	1070	1.571	1.92	0.14	0.1421	0.0095	0	1039	54	848	54	1566	48	848	54	18.3831	0.636537
Chil2b.09	187	1.6	3.35	0.19	0.2482	0.0099	0	1465	49	1429	51	1580	64	1580	64	9.55696	0.625
Chil2b.39	205	1.65	2.8	0.16	0.231	0.01	0	1329	44	1332	53	1309	73	1309	73	1.75707	0.606061
Chil2b.05	210	1.66	2.74	0.14	0.2254	0.0089	0	1312	40	1304	48	1404	61	1404	61	7.12251	0.60241
Chil2-26	685	1.666	3.015	0.096	0.2379	0.0083	0	1406	25	1384	43	1423	40	1423	40	2.74069	0.60024
Chil2b.86	278	1.688	3.57	0.16	0.2641	0.0093	0	1526	37	1526	49	1584	55	1584	55	3.66162	0.592417
Chil2-109	1470	1.689	3.29	0.14	0.2488	0.0096	0	1459	35	1426	50	1546	29	1546	29	7.76197	0.592066
Chil2b.31	264	1.7	4.04	0.12	0.2743	0.0054	0	1634	25	1561	27	1721	47	1721	47	9.29692	0.588235
Chil2-35	1450	1.706	2.54	0.12	0.1931	0.0073	0	1267	35	1134	40	1494	42	1134	40	10.4972	0.586166
Chil2b.08	82	1.724	12.17	0.4	0.488	0.015	0	2599	35	2564	62	2661	36	2661	36	3.64525	0.580046
Chil2b.32	638	1.75	2.93	0.1	0.2217	0.0063	0	1387	28	1288	33	1553	47	1553	47	17.0637	0.571429
Chil2b.131	780	1.77	3.11	0.11	0.2571	0.0048	0	1426	27	1473	24	1366	65	1366	65	7.83309	0.564972
Chil2b.22	197	1.801	3.325	0.089	0.2637	0.005	0	1479	21	1507	25	1444	48	1444	48	4.36288	0.555247
Chil2b.54	272	1.809	3.79	0.16	0.2672	0.008	0	1585	34	1522	42	1682	47	1682	47	9.51249	0.552792
Chil2-80	955	1.818	2.182	0.058	0.188	0.0042	0	1170	18	1109	23	1293	36	1109	23	5.21368	0.550055
Chil2b.98	159	1.82	2.18	0.16	0.192	0.013	0	1134	55	1117	69	1174	88	1117	69	1.49912	0.549451
Chil2b.16	255	1.83	4.05	0.13	0.2756	0.0077	0	1635	28	1577	36	1724	47	1724	47	8.52668	0.546448
Chil2-64	418	1.839	3.99	0.2	0.255	0.0059	0	1610	37	1462	30	1791	67	1791	67	18.3696	0.543774
Chil2-74	630	1.87	2.883	0.077	0.2275	0.0043	0	1376	21	1320	22	1470	37	1470	37	10.2041	0.534759
Chil2-24	648	1.894	4.69	0.15	0.2868	0.0097	0	1757	28	1619	49	1913	40	1913	40	15.3685	0.527983
Chil2-96	214	1.9	1.447	0.071	0.1255	0.006	0	895	29	759	34	1290	120	759	34	15.1955	0.526316
Chil2-46	22680	1.905	4.003	0.08	0.2903	0.0057	0	1631	16	1641	28	1607	21	1607	21	2.11574	0.524934
Chil2-121	176	1.92	11.93	0.36	0.491	0.012	0	2586	28	2567	51	2643	32	2643	32	2.87552	0.520833
Chil2b.06	144	1.94	3.21	0.27	0.249	0.015	0	1401	66	1430	77	1420	140	1420	140	0.704225	0.515464
Chil2b.72	158	1.952	2.71	0.15	0.2315	0.0075	0	1304	40	1338	40	1277	92	1277	92	4.77682	0.512295
Chil2-42	412	1.96	3.49	0.12	0.2486	0.0091	0	1513	27	1425	48	1578	57	1578	57	9.69582	0.510204
Chil2-83	1260	1.967	2.414	0.042	0.1983	0.0038	0	1246	12	1165	20	1399	29	1165	20	6.5008	0.508388
Chil2-20	820	1.967	2.477	0.067	0.1995	0.0054	0	1264	20	1171	29	1400	44	1171	29	7.35759	0.508388
Chil2-9	239	1.97	3.69	0.12	0.2657	0.0059	0	1559	25	1517	30	1591	50	1591	50	4.65116	0.507614
Chil2b.38	211	2.01	3.83	0.15	0.2867	0.0072	0	1595	30	1622	36	1552	67	1552	67	4.51031	0.497512
Chil2-6	1333	2.04	3.133	0.077	0.2381	0.0057	0	1435	19	1375	30	1507	30	1507	30	8.75912	0.490196
Chil2b.37	88	2.07	12.37	0.42	0.503	0.015	0	2648	31	2646	59	2653	44	2653	44	0.263852	0.483092
Chil2b.99	588	2.082	2.69	0.11	0.2204	0.0076	0	1310	31	1279	40	1357	48	1357	48	5.74797	0.480307
Chil2-53	1009	2.093	1.955	0.061	0.1699	0.0028	0	1093	20	1011	15	1250	45	1011	15	7.50229	0.477783
Chil2b.15	700	2.1	3.61	0.12	0.2472	0.0065	0	1557	25	1421	34	1751	27	1751	27	18.8464	0.47619
Chil2-31	822	2.14	1.879	0.051	0.1721	0.0045	0	1068	18	1022	25	1146	48	1022	25	4.30712	0.46729
Chil2b.142	6880	2.183	3.163	0.099	0.2505	0.0052	0	1437	26	1444	26	1448	45	1448	45	0.276243	0.458085
Chil2b.18	851	2.19	2.392	0.096	0.2039	0.0052	0	1231	29	1194	28	1258	52	1194	28	3.00569	0.456621
Chil2-114	443	2.19	3.011	0.086	0.2359	0.004	0	1403	21	1364	21	1465	42	1465	42	6.8942	0.456621
Chil2b.95	351	2.2	2.188	0.09	0.1959	0.0053	0	1181	27	1151	29	1157	80	1151	29	2.54022	0.454545
Chil2b.84	740	2.3	2.05	0.12	0.1849	0.0082	0	1111	40	1088	45	1171	74	1088	45	2.07021	0.434783
Chil2b.28	111	2.3	2.48	0.11	0.2196	0.0053	0	1257	33	1278	28	1223	90	1223	90	4.49714	0.434783
Chil2-19	1027	2.35	2.855	0.075	0.2254	0.0054	0	1364	20	1312	29	1434	35	1434	35	8.50767	0.425532
Chil2b.55	187	2.356	2.67	0.15	0.2232	0.008	0	1288	43	1294	42	1270	89	1270	89	1.88976	0.424448
Chil2-38	599	2.37	2.599	0.066	0.2136	0.0045	0	1295	18	1246	24	1356	36	1356	36	8.11209	0.421941
Chil2b.111	425	2.44	3.46	0.14	0.282	0.01	0	1508	32	1598	50	1376	55	1376	55	16.1337	0.409836
Chil2b.36	487	2.492	3.178	0.079	0.2498	0.0055	0	1448	20	1435	28	1475	35	1475	35	2.71186	0.401284
Chil2b.119	325	2.495	2.378	0.095	0.2137	0.0052	0	1222	29	1246	27	1146	73	1146	27	1.96399	0.400802
Chil2-52	1977	2.499	2.695	0.093	0.212	0.0059	0	1317	25	1237	31	1439	25	1439	25	14.0375	0.40016
Chil2b.10	426	2.56	2.66	0.11	0.2291	0.0073	0	1301	33	1326	38	1316	68	1316	68	0.759878	0.390625
Chil2b.139	4120	2.578	1.96	0.053	0.1855	0.0027	0	1100	20	1097	15	1088	58	1097	15	0.272727	0.387898
Chil2-43	550	2.593	2.46	0.052	0.1988	0.0036	0	1257	15	1168	19	1394	39	1168	19	7.08035	0.385654
Chil2b.47	1050	2.62	2.43	0.16	0.209	0.011	0	1212	50	1217	59	1222	46	1222	46	0.409165	0.381679
Chil2b.107	1710	2.65	1.304	0.083	0.1237	0.0076	0	824	36	747	43	1069	46	747	43	9.34466	0.377358
Chil2-78	961	2.77	3.394	0.084	0.2602	0.0042	0	1497	19	1490	21	1507	29	1507	29	1.12807	0.361011
Chil2-108	155	2.77	13.33	0.26	0.531	0.011	0	2698	19	2739	46	2682	30	2682	30	2.12528	0.361011
Chil2b.90	1730	2.79	1.862	0.079	0.1742	0.0067	0	1055	31	1031	37	1108	36	1031	37	2.27488	0.358423
Chil2b.49	3490	2.8	1.09	0.12	0.0917	0.0098	0	687	55	556	57	1341	53	556	57	19.0684	0.357143
Chil2-112	293.9	2.842	1.795	0.055	0.1786	0.0031	0	1037	20	1058	17	1008	51	1058	17	2.02507	0.351865
Chil2b.68	790	2.86	1.824	0.069	0.1731	0.0041	0	1060	22	1031	21	1126	51	1031	21	2.73585	0.34965
Chil2-3	1311	2.92	2.04	0.079	0.1703	0.0064	0	1118	27	1011	35	1286	45	1011	35	9.57066	0.342466
Chil2b.67	1570	2.96	2.79	0.23	0.194	0.015	0	1288	61	1124	79	1688	40	1124	79	12.7329	0.337838
Chil2-98	739	2.962	2.974	0.083	0.232	0.0043	0	1394	21	1344	22	1486	36	1486	36	9.55585	0.33761
Chil2b.103	773	2.98	2.36	0.12	0.1948	0.0074	0	1208	37	1143	40	1313	58	1143	40	5.38079	0.33557
Chil2b.30	3770	3.01	0.521	0.02	0.0555	0.0015	0	425	14	348.2	9.2	1010	40	348.2	9.2	18.0706	0.332226
Chil2-32	416	3.02	3.084	0.094	0.2421	0.0054	0	1423	24	1396	28	1442	55	1442	55	3.19001	0.331126
Chil2-67	903	3.039	3.216	0.083	0.237	0.0055	0	1455	20	1369	28	1552	45	1552	45	11.7912	0.329056
Chil2b.01	143	3.11	4.1	0.19	0.2758	0.0071	0	1631	32	1578	33	1711	61	1711	61	7.77323	0.321543
Chil2-111	308	3.19	1.786	0.059	0.1689	0.0035	0	1033	22	1008	19	1106	65	1008	19	2.42014	0.31348
Chil2b.126	402	3.21	2.345	0.086	0.2112	0.0055	0	1220	25	1233	29	1191	59	1191	29	1.06557	0.311526
Chil2b.112	468	3.21	3.89	0.14	0.2898	0.0088	0	1601	29	1635	44	1550	41	1550	41	5.48387	0.311526
Chil2-37	425	3.299	11.43	0.24	0.4782	0.0096	0	2553	19	2515	42	2571	24	2571	24	2.17814	0.303122
Chil2-45	768	3.47	8.99	0.53	0.386	0.024	0	2280	61	2070	110	2547	26	2547	26	18.7279	0.288184
Chil2b.79	413	3.63	3.66	0.11	0.2833	0.0049	0	1556	26	1610	26	1494	53	1494	53	7.76439	0.275482
Chil2-40	637	3.74	2.474	0.057	0.218	0.0043	0	1263	17	1270	23	1223	39	1223	39	3.84301	0.26738
Chil2b.74	266	4	3.07	0.12	0.2323	0.0062	0	1414	31	1344	33	1524	59	1524	59	11.811	0.25
Chil2-70	328	4.07	2.79	0.23	0.1967	0.0055	0	1306	39	1155	29	1555	86	1155	29	11.562	0.2457
Chil2-104	130	4.53	2.54	0.16	0.2044	0.006	0	1252	44	1196	32	1340	120	1196	32	4.47284	0.220751
Chil2-21	1259	4.58	1.821	0.047	0.1631	0.0041	0	1051	16	973	23	1172	44	973	23	7.4215	0.218341
Chil2b.83	829	4.6	3.1	0.14	0.2487	0.0088	0	1414	37	1426	46	1395	41	1395	41	2.22222	0.217391
Chil2b.122	964	4.95	2.047	0.059	0.1893	0.0049	0	1124	20	1116	26	1107	40	1116	26	0.711744	0.20202
Chil2b.110	615	5.05	2.98	0.12	0.2412	0.0059	0	1384	22	1395	32	1388	55	1388	55	0.504323	0.19802
Chil2-94	586	6.92	10.78	0.22	0.4494	0.0071	0	2498	19	2394	32	2601	21	2601	21	7.95848	0.144509
Chil2-82	563	8.1	2.036	0.057	0.1851	0.0039	0	1124	19	1094	21	1199	57	1094	21	2.66904	0.123457
Chil2-68	961	9	2.249	0.074	0.1899	0.0042	0	1188	22	1120	22	1268	60	1120	22	5.72391	0.111111
Chil2-115	834	9.5	2.19	0.076	0.182	0.0043	0	1172	25	1077	24	1364	50	1077	24	8.1058	0.105263
Chil2b.111	2590	10	1.331	0.077	0.1297	0.0087	0	856	34	785	49	1007	83	785	49	8.29439	0.1
Chil2-39	1450	10.2	2.089	0.068	0.1763	0.0047	0	1143	23	1045	26	1296	42	1045	26	8.57393	0.0980392
Chil2-72	1307	10.4	2.727	0.044	0.2265	0.0034	0	1336	11	1315	18	1372	29	1372	29	4.15452	0.0961538
Chil2b.57	125	11.1	3.62	0.21	0.281	0.011	0	1542	47	1588	53	1430	120	1430	120	11.049	0.0900901
Chil2-16	1140	11.5	2.296	0.097	0.1838	0.0046	0	1202	29	1086	25	1372	62	1086	25	9.65058	0.0869565
Chil2b.27	238	12.49	1.91	0.1	0.1802	0.0063	0	1068	34	1072	32	1081	92	1072	32	0.374532	0.0800641
Chil2b.56	635	15.7	1.97	0.054	0.1893	0.0036	0	1102	19	1117	20	1074	49	1117	20	1.36116	0.0636943
Chil2-22	453	18	1.91	0.088	0.164	0.0065	0	1073	31	980	37	1248	70	980	37	8.66729	0.0555556
Chil2b.102	406	56	1.816	0.06	0.1767	0.0049	0	1046	22	1047	27	1032	58	1047	27	0.0956023	0.0178571
Chil2b.133	850	102	3.57	0.17	0.2748	0.0059	0	1521	31	1563	30	1421	75	1421	75	9.99296	0.00980392
Chil2-1	1437	2.1	5.16	0.15	0.2724	0.0089	0	1836	24	1548	45	2685	42	DISC	DISC	42.3464
Chil2-10	434	0.921	8.56	0.51	0.335	0.02	0	2253	65	1840	100	2675	26	DISC	DISC	31.215
Chil2-102	392	0.484	7.09	0.31	0.281	0.015	0	2095	43	1579	78	2729	40	DISC	DISC	42.14
Chil2-11	791	1.54	7.82	0.47	0.314	0.019	0	2160	56	1738	93	2586	34	DISC	DISC	32.792
Chil2-117	1690	0.326	2.41	0.15	0.1058	0.0053	0	1212	47	646	31	2590	36	DISC	DISC	46.6997
Chil2-122	2550	0.4	2.28	0.12	0.1015	0.0046	0	1182	39	621	27	2547	35	DISC	DISC	47.4619
Chil2-124	705	2.48	3.27	0.15	0.2157	0.0056	0	1450	39	1257	30	1766	67	DISC	DISC	28.8222
Chil2-125	1135	0.328	5.46	0.27	0.24	0.013	0	1860	47	1374	66	2539	22	DISC	DISC	45.8842
Chil2-13	880	0.336	5.01	0.28	0.209	0.012	0	1774	56	1211	66	2577	26	DISC	DISC	53.0074
Chil2-18	828	1.221	6.7	0.24	0.2722	0.0075	0	2057	30	1548	38	2601	29	DISC	DISC	40.4844
Chil2-23	2670	0.48	6.3	1.9	0.186	0.022	0	1620	100	1070	100	2680	110	DISC	DISC	33.9506
Chil2-25	690	0.854	6.4	0.2	0.2574	0.0094	0	2020	28	1470	48	2642	33	DISC	DISC	44.3603
Chil2-28	2040	1.83	1.463	0.067	0.1115	0.005	0	903	27	679	29	1496	57	DISC	DISC	24.8062
Chil2-4	128	0.67	4.09	0.27	0.2259	0.007	0	1620	54	1309	37	2010	110	DISC	DISC	34.8756
Chil2-41	484.4	5.32	5.08	0.26	0.2568	0.0063	0	1825	43	1471	32	2232	75	DISC	DISC	34.095
Chil2-44	885	1.955	3.21	0.17	0.2188	0.0046	0	1438	37	1274	25	1657	72	DISC	DISC	23.1141
Chil2-50	477	1.34	7.74	0.34	0.327	0.012	0	2184	47	1825	56	2578	31	DISC	DISC	29.2087
Chil2-54	1764	0.415	3.98	0.23	0.1552	0.0075	0	1613	43	932	42	2673	28	DISC	DISC	42.2195
Chil2-55	351	0.553	7.18	0.36	0.297	0.015	0	2098	48	1662	76	2600	28	DISC	DISC	36.0769
Chil2-57	664	1.138	8.15	0.36	0.329	0.016	0	2250	40	1829	76	2653	23	DISC	DISC	31.0592
Chil2-61	75	6	6.37	0.71	0.1679	0.0086	0	1912	96	995	46	3050	200	DISC	DISC	47.9603
Chil2-62	695	1.31	4.72	0.13	0.2624	0.007	0	1762	23	1504	35	2088	50	DISC	DISC	27.9693
Chil2-63	342	0.996	4.26	0.18	0.2442	0.0052	0	1668	33	1410	28	1999	73	DISC	DISC	29.4647
Chil2-65	282	1.153	2.86	0.17	0.1795	0.0036	0	1340	36	1063	20	1793	88	DISC	DISC	20.6716
Chil2-69	238	0.608	8.99	0.4	0.344	0.016	0	2314	42	1891	75	2660	36	DISC	DISC	28.9098
Chil2-75	198	0.877	3.69	0.22	0.2202	0.005	0	1540	46	1281	26	1880	100	DISC	DISC	31.8617
Chil2-77	719	0.42	6.47	0.5	0.261	0.018	0	1972	64	1473	91	2582	26	DISC	DISC	42.9512
Chil2-79	1260	2.59	6.23	0.49	0.271	0.021	0	1889	96	1510	110	2490	31	DISC	DISC	39.3574
Chil2-8	143	0.636	9.64	0.34	0.383	0.015	0	2393	32	2089	70	2626	43	DISC	DISC	20.4494
Chil2-81	1015	1.466	5.53	0.11	0.2762	0.0062	0	1903	17	1570	31	2298	25	DISC	DISC	31.6797
Chil2-86	265	0.43	7.15	0.17	0.2979	0.0064	0	2127	20	1678	32	2600	28	DISC	DISC	35.4615
Chil2-87	373	0.331	6.63	0.65	0.1867	0.0063	0	1934	90	1101	34	2960	120	DISC	DISC	43.0714
Chil2-88	1980	0.316	3.86	0.21	0.1669	0.0096	0	1586	45	988	52	2556	21	DISC	DISC	37.7049
Chil2-89	2290	0.641	5.11	0.47	0.173	0.014	0	1740	76	1013	75	2877	45	DISC	DISC	41.7816
Chil2-91	721	1.159	6.52	0.44	0.25	0.011	0	2008	58	1428	58	2704	48	DISC	DISC	47.1893
Chil2-93	1490	1.466	7.09	0.31	0.298	0.012	0	2100	37	1670	60	2588	19	DISC	DISC	35.4714
Chil2-97	326	1.047	5.2	0.29	0.2835	0.0087	0	1826	47	1604	44	2100	85	DISC	DISC	23.619
Chil2-99	700	1.165	9.5	0.34	0.3802	0.0098	0	2370	33	2072	46	2659	27	DISC	DISC	22.076
Chil2b.04	608	0.764	2.803	0.07	0.2075	0.0046	0	1350	19	1214	25	1583	34	DISC	DISC	23.3102
Chil2b.104	461	0.4774	5.83	0.3	0.242	0.012	0	1933	43	1386	60	2589	38	DISC	DISC	46.4658
Chil2b.105	664	0.702	6.61	0.29	0.281	0.01	0	2032	41	1591	52	2515	33	DISC	DISC	36.7396
Chil2b.114	1930	0.45	1.75	0.1	0.084	0.0038	0	1001	38	519	22	2272	42	DISC	DISC	48.1518
Chil2b.116	3450	2.72	1.248	0.053	0.092	0.0059	0	815	24	564	35	1626	88	DISC	DISC	30.7975
Chil2b.123	1870	0.568	3.38	0.26	0.1406	0.0099	0	1442	56	840	55	2534	27	DISC	DISC	41.7476
Chil2b.129	1375	0.812	10.02	0.46	0.372	0.014	0	2407	45	2028	69	2751	23	DISC	DISC	26.2814
Chil2b.134	9710	0.863	0.963	0.022	0.0874	0.0021	0	682	11	539	12	1173	39	DISC	DISC	20.9677
Chil2b.135	4660	0.601	4.29	0.32	0.193	0.013	0	1627	59	1121	71	2432	29	DISC	DISC	31.1002
Chil2b.136	2160	1.31	8.79	0.22	0.3651	0.0076	0	2310	23	2003	36	2569	30	DISC	DISC	22.0319
Chil2b.138	1370	0.823	4.2	0.14	0.2534	0.0065	0	1666	27	1453	34	1939	47	DISC	DISC	25.0645
Chil2b.14	132	0.925	5.28	0.2	0.296	0.01	0	1850	35	1665	51	2109	45	DISC	DISC	21.0526
Chil2b.141	55700	1.124	0.441	0.038	0.0422	0.0031	0	359	25	266	19	1041	64	DISC	DISC	25.9053
Chil2b.20	279	0.598	8.78	0.25	0.36	0.01	0	2312	26	1978	49	2657	50	DISC	DISC	25.5551
Chil2b.24	2270	1.485	1.199	0.094	0.0999	0.0077	0	770	40	608	44	1363	35	DISC	DISC	21.039
Chil2b.25	896	1.017	2.941	0.096	0.2065	0.0059	0	1384	24	1208	31	1674	37	DISC	DISC	27.8375
Chil2b.29	607	0.544	7.06	0.37	0.269	0.012	0	2077	50	1526	59	2701	31	DISC	DISC	43.5024
Chil2b.33	3320	0.228	0.837	0.031	0.0408	0.0019	0	617	17	257	12	2359	43	DISC	DISC	58.3468
Chil2b.40	752	0.249	3.04	0.24	0.1239	0.0091	0	1357	58	745	51	2610	32	DISC	DISC	45.0995
Chil2b.42	257	0.374	6.78	0.14	0.2824	0.0056	0	2080	18	1601	28	2611	29	DISC	DISC	38.6825
Chil2b.44	2980	0.895	0.992	0.081	0.085	0.0065	0	676	44	523	39	1246	48	DISC	DISC	22.6331
Chil2b.48	1930	0.968	5.76	0.6	0.208	0.021	0	1760	110	1190	110	2807	34	DISC	DISC	32.3864
Chil2b.51	1830	1.255	1.184	0.079	0.0958	0.0058	0	772	34	587	34	1403	32	DISC	DISC	23.9637
Chil2b.52	2780	0.142	0.625	0.021	0.0535	0.0021	0	491	13	336	13	1303	42	DISC	DISC	31.5682
Chil2b.59	393	0.426	8.94	0.19	0.3542	0.008	0	2325	20	1950	39	2674	29	DISC	DISC	27.0755
Chil2b.62	930	0.833	7.14	0.37	0.295	0.014	0	2084	53	1659	74	2590	27	DISC	DISC	35.9459
Chil2b.64	630	0.581	7.96	0.61	0.329	0.025	0	2148	73	1800	120	2605	29	DISC	DISC	30.9021
Chil2b.65	632	0.831	3.278	0.082	0.2258	0.0047	0	1469	20	1311	25	1713	35	DISC	DISC	23.4676
Chil2b.80	840	0.772	8.29	0.48	0.342	0.018	0	2213	61	1878	85	2582	29	DISC	DISC	27.2657
Chil2b.85	1540	0.287	0.879	0.054	0.0766	0.0049	0	636	31	475	30	1330	120	DISC	DISC	25.3145
Chil2b.89	23	0.59	36.1	2.5	0.435	0.038	0	3642	64	2230	130	4500	120	DISC	DISC	50.4444
Chil2b.92	1290	0.542	1.39	0.11	0.1096	0.0093	0	850	44	663	52	1510	52	DISC	DISC	22
Chil2b.93	1150	2.25	7.96	0.73	0.335	0.029	0	2060	100	1810	140	2477	38	DISC	DISC	26.9277
Chil2b.97	788	0.737	6.56	0.38	0.297	0.015	0	2006	57	1662	78	2414	29	DISC	DISC	31.1516
Chil2-119	0.88	0	0	0	0	0	0	0	0	0	0	0	0	#DIV/0!	#DIV/0!	#DIV/0!
Chil2b.121	0.69	0	0	0	0	0	0	0	0	0	0	0	0	#DIV/0!	#DIV/0!	#DIV/0!
Chil2b.41	0.508	0	0	0	0	0	0	0	0	0	0	0	0	#DIV/0!	#DIV/0!	#DIV/0!
Chil2b.46	-49.5	0	0	0	0	0	0	0	0	0	0	0	0	#DIV/0!	#DIV/0!	#DIV/0!
Chil2b.73	0.205	0	0	0	0	0	0	0	0	0	0	0	0	#DIV/0!	#DIV/0!	#DIV/0!
Chil2b.82	0.21	0	0	0	0	0	0	0	0	0	0	0	0	#DIV/0!	#DIV/0!	#DIV/0!
0	0	0	0	0	0	0	0	0	0	0	0	0	0	#DIV/0!	#DIV/0!	#DIV/0!
0	0	0	0	0	0	0	0	0	0	0	0	0	0	#DIV/0!	#DIV/0!	#DIV/0!
0	0	0	0	0	0	0	0	0	0	0	0	0	0	#DIV/0!	#DIV/0!	#DIV/0!
0	0	0	0	0	0	0	0	0	0	0	0	0	0	#DIV/0!	#DIV/0!	#DIV/0!
0	0	0	0	0	0	0	0	0	0	0	0	0	0	#DIV/0!	#DIV/0!	#DIV/0!
0	0	0	0	0	0	0	0	0	0	0	0	0	0	#DIV/0!	#DIV/0!	#DIV/0!
0	0	0	0	0	0	0	0	0	0	0	0	0	0	#DIV/0!	#DIV/0!	#DIV/0!
0	0	0	0	0	0	0	0	0	0	0	0	0	0	#DIV/0!	#DIV/0!	#DIV/0!
0	0	0	0	0	0	0	0	0	0	0	0	0	0	#DIV/0!	#DIV/0!	#DIV/0!
0	0	0	0	0	0	0	0	0	0	0	0	0	0	#DIV/0!	#DIV/0!	#DIV/0!
0	0	0	0	0	0	0	0	0	0	0	0	0	0	#DIV/0!	#DIV/0!	#DIV/0!
0	0	0	0	0	0	0	0	0	0	0	0	0	0	#DIV/0!	#DIV/0!	#DIV/0!
0	0	0	0	0	0	0	0	0	0	0	0	0	0	#DIV/0!	#DIV/0!	#DIV/0!
0	0	0	0	0	0	0	0	0	0	0	0	0	0	#DIV/0!	#DIV/0!	#DIV/0!
0	0	0	0	0	0	0	0	0	0	0	0	0	0	#DIV/0!	#DIV/0!	#DIV/0!
0	0	0	0	0	0	0	0	0	0	0	0	0	0	#DIV/0!	#DIV/0!	#DIV/0!
0	0	0	0	0	0	0	0	0	0	0	0	0	0	#DIV/0!	#DIV/0!	#DIV/0!
0	0	0	0	0	0	0	0	0	0	0	0	0	0	#DIV/0!	#DIV/0!	#DIV/0!
0	0	0	0	0	0	0	0	0	0	0	0	0	0	#DIV/0!	#DIV/0!	#DIV/0!
0	0	0	0	0	0	0	0	0	0	0	0	0	0	#DIV/0!	#DIV/0!	#DIV/0!
0	0	0	0	0	0	0	0	0	0	0	0	0	0	#DIV/0!	#DIV/0!	#DIV/0!
0	0	0	0	0	0	0	0	0	0	0	0	0	0	#DIV/0!	#DIV/0!	#DIV/0!
0	0	0	0	0	0	0	0	0	0	0	0	0	0	#DIV/0!	#DIV/0!	#DIV/0!
0	0	0	0	0	0	0	0	0	0	0	0	0	0	#DIV/0!	#DIV/0!	#DIV/0!
0	0	0	0	0	0	0	0	0	0	0	0	0	0	#DIV/0!	#DIV/0!	#DIV/0!
0	0	0	0	0	0	0	0	0	0	0	0	0	0	#DIV/0!	#DIV/0!	#DIV/0!
0	0	0	0	0	0	0	0	0	0	0	0	0	0	#DIV/0!	#DIV/0!	#DIV/0!
0	0	0	0	0	0	0	0	0	0	0	0	0	0	#DIV/0!	#DIV/0!	#DIV/0!
0	0	0	0	0	0	0	0	0	0	0	0	0	0	#DIV/0!	#DIV/0!	#DIV/0!
0	0	0	0	0	0	0	0	0	0	0	0	0	0	#DIV/0!	#DIV/0!	#DIV/0!
0	0	0	0	0	0	0	0	0	0	0	0	0	0	#DIV/0!	#DIV/0!	#DIV/0!
0	0	0	0	0	0	0	0	0	0	0	0	0	0	#DIV/0!	#DIV/0!	#DIV/0!
0	0	0	0	0	0	0	0	0	0	0	0	0	0	#DIV/0!	#DIV/0!	#DIV/0!
0	0	0	0	0	0	0	0	0	0	0	0	0	0	#DIV/0!	#DIV/0!	#DIV/0!
0	0	0	0	0	0	0	0	0	0	0	0	0	0	#DIV/0!	#DIV/0!	#DIV/0!
0	0	0	0	0	0	0	0	0	0	0	0	0	0	#DIV/0!	#DIV/0!	#DIV/0!
0	0	0	0	0	0	0	0	0	0	0	0	0	0	#DIV/0!	#DIV/0!	#DIV/0!
0	0	0	0	0	0	0	0	0	0	0	0	0	0	#DIV/0!	#DIV/0!	#DIV/0!
0	0	0	0	0	0	0	0	0	0	0	0	0	0	#DIV/0!	#DIV/0!	#DIV/0!
0	0	0	0	0	0	0	0	0	0	0	0	0	0	#DIV/0!	#DIV/0!	#DIV/0!
0	0	0	0	0	0	0	0	0	0	0	0	0	0	#DIV/0!	#DIV/0!	#DIV/0!
0	0	0	0	0	0	0	0	0	0	0	0	0	0	#DIV/0!	#DIV/0!	#DIV/0!
0	0	0	0	0	0	0	0	0	0	0	0	0	0	#DIV/0!	#DIV/0!	#DIV/0!
0	0	0	0	0	0	0	0	0	0	0	0	0	0	#DIV/0!	#DIV/0!	#DIV/0!
0	0	0	0	0	0	0	0	0	0	0	0	0	0	#DIV/0!	#DIV/0!	#DIV/0!
0	0	0	0	0	0	0	0	0	0	0	0	0	0	#DIV/0!	#DIV/0!	#DIV/0!
0	0	0	0	0	0	0	0	0	0	0	0	0	0	#DIV/0!	#DIV/0!	#DIV/0!
0	0	0	0	0	0	0	0	0	0	0	0	0	0	#DIV/0!	#DIV/0!	#DIV/0!
0	0	0	0	0	0	0	0	0	0	0	0	0	0	#DIV/0!	#DIV/0!	#DIV/0!
0	0	0	0	0	0	0	0	0	0	0	0	0	0	#DIV/0!	#DIV/0!	#DIV/0!
0	0	0	0	0	0	0	0	0	0	0	0	0	0	#DIV/0!	#DIV/0!	#DIV/0!
0	0	0	0	0	0	0	0	0	0	0	0	0	0	#DIV/0!	#DIV/0!	#DIV/0!
0	0	0	0	0	0	0	0	0	0	0	0	0	0	#DIV/0!	#DIV/0!	#DIV/0!
0	0	0	0	0	0	0	0	0	0	0	0	0	0	#DIV/0!	#DIV/0!	#DIV/0!
0	0	0	0	0	0	0	0	0	0	0	0	0	0	#DIV/0!	#DIV/0!	#DIV/0!
0	0	0	0	0	0	0	0	0	0	0	0	0	0	#DIV/0!	#DIV/0!	#DIV/0!
0	0	0	0	0	0	0	0	0	0	0	0	0	0	#DIV/0!	#DIV/0!	#DIV/0!
0	0	0	0	0	0	0	0	0	0	0	0	0	0	#DIV/0!	#DIV/0!	#DIV/0!
0	0	0	0	0	0	0	0	0	0	0	0	0	0	#DIV/0!	#DIV/0!	#DIV/0!
0	0	0	0	0	0	0	0	0	0	0	0	0	0	#DIV/0!	#DIV/0!	#DIV/0!
0	0	0	0	0	0	0	0	0	0	0	0	0	0	#DIV/0!	#DIV/0!	#DIV/0!
0	0	0	0	0	0	0	0	0	0	0	0	0	0	#DIV/0!	#DIV/0!	#DIV/0!
0	0	0	0	0	0	0	0	0	0	0	0	0	0	#DIV/0!	#DIV/0!	#DIV/0!
0	0	0	0	0	0	0	0	0	0	0	0	0	0	#DIV/0!	#DIV/0!	#DIV/0!
0	0	0	0	0	0	0	0	0	0	0	0	0	0	#DIV/0!	#DIV/0!	#DIV/0!
0	0	0	0	0	0	0	0	0	0	0	0	0	0	#DIV/0!	#DIV/0!	#DIV/0!
0	0	0	0	0	0	0	0	0	0	0	0	0	0	#DIV/0!	#DIV/0!	#DIV/0!
0	0	0	0	0	0	0	0	0	0	0	0	0	0	#DIV/0!	#DIV/0!	#DIV/0!
0	0	0	0	0	0	0	0	0	0	0	0	0	0	#DIV/0!	#DIV/0!	#DIV/0!
0	0	0	0	0	0	0	0	0	0	0	0	0	0	#DIV/0!	#DIV/0!	#DIV/0!
0	0	0	0	0	0	0	0	0	0	0	0	0	0	#DIV/0!	#DIV/0!	#DIV/0!
0	0	0	0	0	0	0	0	0	0	0	0	0	0	#DIV/0!	#DIV/0!	#DIV/0!
0	0	0	0	0	0	0	0	0	0	0	0	0	0	#DIV/0!	#DIV/0!	#DIV/0!
0	0	0	0	0	0	0	0	0	0	0	0	0	0	#DIV/0!	#DIV/0!	#DIV/0!
0	0	0	0	0	0	0	0	0	0	0	0	0	0	#DIV/0!	#DIV/0!	#DIV/0!
0	0	0	0	0	0	0	0	0	0	0	0	0	0	#DIV/0!	#DIV/0!	#DIV/0!
0	0	0	0	0	0	0	0	0	0	0	0	0	0	#DIV/0!	#DIV/0!	#DIV/0!
0	0	0	0	0	0	0	0	0	0	0	0	0	0	#DIV/0!	#DIV/0!	#DIV/0!
0	0	0	0	0	0	0	0	0	0	0	0	0	0	#DIV/0!	#DIV/0!	#DIV/0!
0	0	0	0	0	0	0	0	0	0	0	0	0	0	#DIV/0!	#DIV/0!	#DIV/0!
0	0	0	0	0	0	0	0	0	0	0	0	0	0	#DIV/0!	#DIV/0!	#DIV/0!
0	0	0	0	0	0	0	0	0	0	0	0	0	0	#DIV/0!	#DIV/0!	#DIV/0!
0	0	0	0	0	0	0	0	0	0	0	0	0	0	#DIV/0!	#DIV/0!	#DIV/0!
0	0	0	0	0	0	0	0	0	0	0	0	0	0	#DIV/0!	#DIV/0!	#DIV/0!
0	0	0	0	0	0	0	0	0	0	0	0	0	0	#DIV/0!	#DIV/0!	#DIV/0!
0	0	0	0	0	0	0	0	0	0	0	0	0	0	#DIV/0!	#DIV/0!	#DIV/0!
0	0	0	0	0	0	0	0	0	0	0	0	0	0	#DIV/0!	#DIV/0!	#DIV/0!
0	0	0	0	0	0	0	0	0	0	0	0	0	0	#DIV/0!	#DIV/0!	#DIV/0!
0	0	0	0	0	0	0	0	0	0	0	0	0	0	#DIV/0!	#DIV/0!	#DIV/0!
0	0	0	0	0	0	0	0	0	0	0	0	0	0	#DIV/0!	#DIV/0!	#DIV/0!
0	0	0	0	0	0	0	0	0	0	0	0	0	0	#DIV/0!	#DIV/0!	#DIV/0!
0	0	0	0	0	0	0	0	0	0	0	0	0	0	#DIV/0!	#DIV/0!	#DIV/0!
0	0	0	0	0	0	0	0	0	0	0	0	0	0	#DIV/0!	#DIV/0!	#DIV/0!
0	0	0	0	0	0	0	0	0	0	0	0	0	0	#DIV/0!	#DIV/0!	#DIV/0!
0	0	0	0	0	0	0	0	0	0	0	0	0	0	#DIV/0!	#DIV/0!	#DIV/0!
0	0	0	0	0	0	0	0	0	0	0	0	0	0	#DIV/0!	#DIV/0!	#DIV/0!
0	0	0	0	0	0	0	0	0	0	0	0	0	0	#DIV/0!	#DIV/0!	#DIV/0!
0	0	0	0	0	0	0	0	0	0	0	0	0	0	#DIV/0!	#DIV/0!	#DIV/0!
0	0	0	0	0	0	0	0	0	0	0	0	0	0	#DIV/0!	#DIV/0!	#DIV/0!
0	0	0	0	0	0	0	0	0	0	0	0	0	0	#DIV/0!	#DIV/0!	#DIV/0!
0	0	0	0	0	0	0	0	0	0	0	0	0	0	#DIV/0!	#DIV/0!	#DIV/0!
0	0	0	0	0	0	0	0	0	0	0	0	0	0	#DIV/0!	#DIV/0!	#DIV/0!
0	0	0	0	0	0	0	0	0	0	0	0	0	0	#DIV/0!	#DIV/0!	#DIV/0!
0	0	0	0	0	0	0	0	0	0	0	0	0	0	#DIV/0!	#DIV/0!	#DIV/0!
0	0	0	0	0	0	0	0	0	0	0	0	0	0	#DIV/0!	#DIV/0!	#DIV/0!
0	0	0	0	0	0	0	0	0	0	0	0	0	0	#DIV/0!	#DIV/0!	#DIV/0!
0	0	0	0	0	0	0	0	0	0	0	0	0	0	#DIV/0!	#DIV/0!	#DIV/0!
0	0	0	0	0	0	0	0	0	0	0	0	0	0	#DIV/0!	#DIV/0!	#DIV/0!
0	0	0	0	0	0	0	0	0	0	0	0	0	0	#DIV/0!	#DIV/0!	#DIV/0!
0	0	0	0	0	0	0	0	0	0	0	0	0	0	#DIV/0!	#DIV/0!	#DIV/0!
0	0	0	0	0	0	0	0	0	0	0	0	0	0	#DIV/0!	#DIV/0!	#DIV/0!
0	0	0	0	0	0	0	0	0	0	0	0	0	0	#DIV/0!	#DIV/0!	#DIV/0!
0	0	0	0	0	0	0	0	0	0	0	0	0	0	#DIV/0!	#DIV/0!	#DIV/0!
0	0	0	0	0	0	0	0	0	0	0	0	0	0	#DIV/0!	#DIV/0!	#DIV/0!
0	0	0	0	0	0	0	0	0	0	0	0	0	0	#DIV/0!	#DIV/0!	#DIV/0!
0	0	0	0	0	0	0	0	0	0	0	0	0	0	#DIV/0!	#DIV/0!	#DIV/0!
0	0	0	0	0	0	0	0	0	0	0	0	0	0	#DIV/0!	#DIV/0!	#DIV/0!
0	0	0	0	0	0	0	0	0	0	0	0	0	0	#DIV/0!	#DIV/0!	#DIV/0!
0	0	0	0	0	0	0	0	0	0	0	0	0	0	#DIV/0!	#DIV/0!	#DIV/0!
0	0	0	0	0	0	0	0	0	0	0	0	0	0	#DIV/0!	#DIV/0!	#DIV/0!
0	0	0	0	0	0	0	0	0	0	0	0	0	0	#DIV/0!	#DIV/0!	#DIV/0!
0	0	0	0	0	0	0	0	0	0	0	0	0	0	#DIV/0!	#DIV/0!	#DIV/0!
0	0	0	0	0	0	0	0	0	0	0	0	0	0	#DIV/0!	#DIV/0!	#DIV/0!
0	0	0	0	0	0	0	0	0	0	0	0	0	0	#DIV/0!	#DIV/0!	#DIV/0!
0	0	0	0	0	0	0	0	0	0	0	0	0	0	#DIV/0!	#DIV/0!	#DIV/0!
0	0	0	0	0	0	0	0	0	0	0	0	0	0	#DIV/0!	#DIV/0!	#DIV/0!
0	0	0	0	0	0	0	0	0	0	0	0	0	0	#DIV/0!	#DIV/0!	#DIV/0!
0	0	0	0	0	0	0	0	0	0	0	0	0	0	#DIV/0!	#DIV/0!	#DIV/0!
0	0	0	0	0	0	0	0	0	0	0	0	0	0	#DIV/0!	#DIV/0!	#DIV/0!
0	0	0	0	0	0	0	0	0	0	0	0	0	0	#DIV/0!	#DIV/0!	#DIV/0!
0	0	0	0	0	0	0	0	0	0	0	0	0	0	#DIV/0!	#DIV/0!	#DIV/0!
0	0	0	0	0	0	0	0	0	0	0	0	0	0	#DIV/0!	#DIV/0!	#DIV/0!
0	0	0	0	0	0	0	0	0	0	0	0	0	0	#DIV/0!	#DIV/0!	#DIV/0!
0	0	0	0	0	0	0	0	0	0	0	0	0	0	#DIV/0!	#DIV/0!	#DIV/0!
0	0	0	0	0	0	0	0	0	0	0	0	0	0	#DIV/0!	#DIV/0!	#DIV/0!
0	0	0	0	0	0	0	0	0	0	0	0	0	0	#DIV/0!	#DIV/0!	#DIV/0!
0	0	0	0	0	0	0	0	0	0	0	0	0	0	#DIV/0!	#DIV/0!	#DIV/0!
0	0	0	0	0	0	0	0	0	0	0	0	0	0	#DIV/0!	#DIV/0!	#DIV/0!
0	0	0	0	0	0	0	0	0	0	0	0	0	0	#DIV/0!	#DIV/0!	#DIV/0!
0	0	0	0	0	0	0	0	0	0	0	0	0	0	#DIV/0!	#DIV/0!	#DIV/0!
0	0	0	0	0	0	0	0	0	0	0	0	0	0	#DIV/0!	#DIV/0!	#DIV/0!
0	0	0	0	0	0	0	0	0	0	0	0	0	0	#DIV/0!	#DIV/0!	#DIV/0!
0	0	0	0	0	0	0	0	0	0	0	0	0	0	#DIV/0!	#DIV/0!	#DIV/0!
0	0	0	0	0	0	0	0	0	0	0	0	0	0	#DIV/0!	#DIV/0!	#DIV/0!
0	0	0	0	0	0	0	0	0	0	0	0	0	0	#DIV/0!	#DIV/0!	#DIV/0!
0	0	0	0	0	0	0	0	0	0	0	0	0	0	#DIV/0!	#DIV/0!	#DIV/0!
0	0	0	0	0	0	0	0	0	0	0	0	0	0	#DIV/0!	#DIV/0!	#DIV/0!
0	0	0	0	0	0	0	0	0	0	0	0	0	0	#DIV/0!	#DIV/0!	#DIV/0!
0	0	0	0	0	0	0	0	0	0	0	0	0	0	#DIV/0!	#DIV/0!	#DIV/0!
0	0	0	0	0	0	0	0	0	0	0	0	0	0	#DIV/0!	#DIV/0!	#DIV/0!
0	0	0	0	0	0	0	0	0	0	0	0	0	0	#DIV/0!	#DIV/0!	#DIV/0!
0	0	0	0	0	0	0	0	0	0	0	0	0	0	#DIV/0!	#DIV/0!	#DIV/0!
0	0	0	0	0	0	0	0	0	0	0	0	0	0	#DIV/0!	#DIV/0!	#DIV/0!
0	0	0	0	0	0	0	0	0	0	0	0	0	0	#DIV/0!	#DIV/0!	#DIV/0!
0	0	0	0	0	0	0	0	0	0	0	0	0	0	#DIV/0!	#DIV/0!	#DIV/0!
0	0	0	0	0	0	0	0	0	0	0	0	0	0	#DIV/0!	#DIV/0!	#DIV/0!
0	0	0	0	0	0	0	0	0	0	0	0	0	0	#DIV/0!	#DIV/0!	#DIV/0!
0	0	0	0	0	0	0	0	0	0	0	0	0	0	#DIV/0!	#DIV/0!	#DIV/0!
0	0	0	0	0	0	0	0	0	0	0	0	0	0	#DIV/0!	#DIV/0!	#DIV/0!
0	0	0	0	0	0	0	0	0	0	0	0	0	0	#DIV/0!	#DIV/0!	#DIV/0!
0	0	0	0	0	0	0	0	0	0	0	0	0	0	#DIV/0!	#DIV/0!	#DIV/0!
0	0	0	0	0	0	0	0	0	0	0	0	0	0	#DIV/0!	#DIV/0!	#DIV/0!
0	0	0	0	0	0	0	0	0	0	0	0	0	0	#DIV/0!	#DIV/0!	#DIV/0!
0	0	0	0	0	0	0	0	0	0	0	0	0	0	#DIV/0!	#DIV/0!	#DIV/0!
0	0	0	0	0	0	0	0	0	0	0	0	0	0	#DIV/0!	#DIV/0!	#DIV/0!
0	0	0	0	0	0	0	0	0	0	0	0	0	0	#DIV/0!	#DIV/0!	#DIV/0!
0	0	0	0	0	0	0	0	0	0	0	0	0	0	#DIV/0!	#DIV/0!	#DIV/0!
0	0	0	0	0	0	0	0	0	0	0	0	0	0	#DIV/0!	#DIV/0!	#DIV/0!
0	0	0	0	0	0	0	0	0	0	0	0	0	0	#DIV/0!	#DIV/0!	#DIV/0!
0	0	0	0	0	0	0	0	0	0	0	0	0	0	#DIV/0!	#DIV/0!	#DIV/0!
0	0	0	0	0	0	0	0	0	0	0	0	0	0	#DIV/0!	#DIV/0!	#DIV/0!
0	0	0	0	0	0	0	0	0	0	0	0	0	0	#DIV/0!	#DIV/0!	#DIV/0!
0	0	0	0	0	0	0	0	0	0	0	0	0	0	#DIV/0!	#DIV/0!	#DIV/0!
0	0	0	0	0	0	0	0	0	0	0	0	0	0	#DIV/0!	#DIV/0!	#DIV/0!
0	0	0	0	0	0	0	0	0	0	0	0	0	0	#DIV/0!	#DIV/0!	#DIV/0!
0	0	0	0	0	0	0	0	0	0	0	0	0	0	#DIV/0!	#DIV/0!	#DIV/0!
0	0	0	0	0	0	0	0	0	0	0	0	0	0	#DIV/0!	#DIV/0!	#DIV/0!
0	0	0	0	0	0	0	0	0	0	0	0	0	0	#DIV/0!	#DIV/0!	#DIV/0!
0	0	0	0	0	0	0	0	0	0	0	0	0	0	#DIV/0!	#DIV/0!	#DIV/0!
0	0	0	0	0	0	0	0	0	0	0	0	0	0	#DIV/0!	#DIV/0!	#DIV/0!
0	0	0	0	0	0	0	0	0	0	0	0	0	0	#DIV/0!	#DIV/0!	#DIV/0!
0	0	0	0	0	0	0	0	0	0	0	0	0	0	#DIV/0!	#DIV/0!	#DIV/0!
0	0	0	0	0	0	0	0	0	0	0	0	0	0	#DIV/0!	#DIV/0!	#DIV/0!
0	0	0	0	0	0	0	0	0	0	0	0	0	0	#DIV/0!	#DIV/0!	#DIV/0!
0	0	0	0	0	0	0	0	0	0	0	0	0	0	#DIV/0!	#DIV/0!	#DIV/0!
0	0	0	0	0	0	0	0	0	0	0	0	0	0	#DIV/0!	#DIV/0!	#DIV/0!
0	0	0	0	0	0	0	0	0	0	0	0	0	0	#DIV/0!	#DIV/0!	#DIV/0!
0	0	0	0	0	0	0	0	0	0	0	0	0	0	#DIV/0!	#DIV/0!	#DIV/0!
0	0	0	0	0	0	0	0	0	0	0	0	0	0	#DIV/0!	#DIV/0!	#DIV/0!
0	0	0	0	0	0	0	0	0	0	0	0	0	0	#DIV/0!	#DIV/0!	#DIV/0!
0	0	0	0	0	0	0	0	0	0	0	0	0	0	#DIV/0!	#DIV/0!	#DIV/0!
0	0	0	0	0	0	0	0	0	0	0	0	0	0	#DIV/0!	#DIV/0!	#DIV/0!
0	0	0	0	0	0	0	0	0	0	0	0	0	0	#DIV/0!	#DIV/0!	#DIV/0!
0	0	0	0	0	0	0	0	0	0	0	0	0	0	#DIV/0!	#DIV/0!	#DIV/0!
0	0	0	0	0	0	0	0	0	0	0	0	0	0	#DIV/0!	#DIV/0!	#DIV/0!
0	0	0	0	0	0	0	0	0	0	0	0	0	0	#DIV/0!	#DIV/0!	#DIV/0!
0	0	0	0	0	0	0	0	0	0	0	0	0	0	#DIV/0!	#DIV/0!	#DIV/0!
0	0	0	0	0	0	0	0	0	0	0	0	0	0	#DIV/0!	#DIV/0!	#DIV/0!
0	0	0	0	0	0	0	0	0	0	0	0	0	0	#DIV/0!	#DIV/0!	#DIV/0!
0	0	0	0	0	0	0	0	0	0	0	0	0	0	#DIV/0!	#DIV/0!	#DIV/0!
0	0	0	0	0	0	0	0	0	0	0	0	0	0	#DIV/0!	#DIV/0!	#DIV/0!
0	0	0	0	0	0	0	0	0	0	0	0	0	0	#DIV/0!	#DIV/0!	#DIV/0!
0	0	0	0	0	0	0	0	0	0	0	0	0	0	#DIV/0!	#DIV/0!	#DIV/0!
0	0	0	0	0	0	0	0	0	0	0	0	0	0	#DIV/0!	#DIV/0!	#DIV/0!
0	0	0	0	0	0	0	0	0	0	0	0	0	0	#DIV/0!	#DIV/0!	#DIV/0!
0	0	0	0	0	0	0	0	0	0	0	0	0	0	#DIV/0!	#DIV/0!	#DIV/0!
0	0	0	0	0	0	0	0	0	0	0	0	0	0	#DIV/0!	#DIV/0!	#DIV/0!
0	0	0	0	0	0	0	0	0	0	0	0	0	0	#DIV/0!	#DIV/0!	#DIV/0!
0	0	0	0	0	0	0	0	0	0	0	0	0	0	#DIV/0!	#DIV/0!	#DIV/0!
0	0	0	0	0	0	0	0	0	0	0	0	0	0	#DIV/0!	#DIV/0!	#DIV/0!
0	0	0	0	0	0	0	0	0	0	0	0	0	0	#DIV/0!	#DIV/0!	#DIV/0!
0	0	0	0	0	0	0	0	0	0	0	0	0	0	#DIV/0!	#DIV/0!	#DIV/0!
0	0	0	0	0	0	0	0	0	0	0	0	0	0	#DIV/0!	#DIV/0!	#DIV/0!
0	0	0	0	0	0	0	0	0	0	0	0	0	0	#DIV/0!	#DIV/0!	#DIV/0!
0	0	0	0	0	0	0	0	0	0	0	0	0	0	#DIV/0!	#DIV/0!	#DIV/0!
0	0	0	0	0	0	0	0	0	0	0	0	0	0	#DIV/0!	#DIV/0!	#DIV/0!
0	0	0	0	0	0	0	0	0	0	0	0	0	0	#DIV/0!	#DIV/0!	#DIV/0!
0	0	0	0	0	0	0	0	0	0	0	0	0	0	#DIV/0!	#DIV/0!	#DIV/0!
0	0	0	0	0	0	0	0	0	0	0	0	0	0	#DIV/0!	#DIV/0!	#DIV/0!
0	0	0	0	0	0	0	0	0	0	0	0	0	0	#DIV/0!	#DIV/0!	#DIV/0!
0	0	0	0	0	0	0	0	0	0	0	0	0	0	#DIV/0!	#DIV/0!	#DIV/0!
0	0	0	0	0	0	0	0	0	0	0	0	0	0	#DIV/0!	#DIV/0!	#DIV/0!
0	0	0	0	0	0	0	0	0	0	0	0	0	0	#DIV/0!	#DIV/0!	#DIV/0!
0	0	0	0	0	0	0	0	0	0	0	0	0	0	#DIV/0!	#DIV/0!	#DIV/0!
0	0	0	0	0	0	0	0	0	0	0	0	0	0	#DIV/0!	#DIV/0!	#DIV/0!
0	0	0	0	0	0	0	0	0	0	0	0	0	0	#DIV/0!	#DIV/0!	#DIV/0!
0	0	0	0	0	0	0	0	0	0	0	0	0	0	#DIV/0!	#DIV/0!	#DIV/0!
0	0	0	0	0	0	0	0	0	0	0	0	0	0	#DIV/0!	#DIV/0!	#DIV/0!
0	0	0	0	0	0	0	0	0	0	0	0	0	0	#DIV/0!	#DIV/0!	#DIV/0!
0	0	0	0	0	0	0	0	0	0	0	0	0	0	#DIV/0!	#DIV/0!	#DIV/0!
0	0	0	0	0	0	0	0	0	0	0	0	0	0	#DIV/0!	#DIV/0!	#DIV/0!
0	0	0	0	0	0	0	0	0	0	0	0	0	0	#DIV/0!	#DIV/0!	#DIV/0!
0	0	0	0	0	0	0	0	0	0	0	0	0	0	#DIV/0!	#DIV/0!	#DIV/0!
0	0	0	0	0	0	0	0	0	0	0	0	0	0	#DIV/0!	#DIV/0!	#DIV/0!
0	0	0	0	0	0	0	0	0	0	0	0	0	0	#DIV/0!	#DIV/0!	#DIV/0!
0	0	0	0	0	0	0	0	0	0	0	0	0	0	#DIV/0!	#DIV/0!	#DIV/0!
0	0	0	0	0	0	0	0	0	0	0	0	0	0	#DIV/0!	#DIV/0!	#DIV/0!
0	0	0	0	0	0	0	0	0	0	0	0	0	0	#DIV/0!	#DIV/0!	#DIV/0!
0	0	0	0	0	0	0	0	0	0	0	0	0	0	#DIV/0!	#DIV/0!	#DIV/0!
0	0	0	0	0	0	0	0	0	0	0	0	0	0	#DIV/0!	#DIV/0!	#DIV/0!
0	0	0	0	0	0	0	0	0	0	0	0	0	0	#DIV/0!	#DIV/0!	#DIV/0!
0	0	0	0	0	0	0	0	0	0	0	0	0	0	#DIV/0!	#DIV/0!	#DIV/0!
0	0	0	0	0	0	0	0	0	0	0	0	0	0	#DIV/0!	#DIV/0!	#DIV/0!
0	0	0	0	0	0	0	0	0	0	0	0	0	0	#DIV/0!	#DIV/0!	#DIV/0!
0	0	0	0	0	0	0	0	0	0	0	0	0	0	#DIV/0!	#DIV/0!	#DIV/0!
0	0	0	0	0	0	0	0	0	0	0	0	0	0	#DIV/0!	#DIV/0!	#DIV/0!
0	0	0	0	0	0	0	0	0	0	0	0	0	0	#DIV/0!	#DIV/0!	#DIV/0!
0	0	0	0	0	0	0	0	0	0	0	0	0	0	#DIV/0!	#DIV/0!	#DIV/0!
0	0	0	0	0	0	0	0	0	0	0	0	0	0	#DIV/0!	#DIV/0!	#DIV/0!
0	0	0	0	0	0	0	0	0	0	0	0	0	0	#DIV/0!	#DIV/0!	#DIV/0!
0	0	0	0	0	0	0	0	0	0	0	0	0	0	#DIV/0!	#DIV/0!	#DIV/0!
0	0	0	0	0	0	0	0	0	0	0	0	0	0	#DIV/0!	#DIV/0!	#DIV/0!
0	0	0	0	0	0	0	0	0	0	0	0	0	0	#DIV/0!	#DIV/0!	#DIV/0!
0	0	0	0	0	0	0	0	0	0	0	0	0	0	#DIV/0!	#DIV/0!	#DIV/0!
0	0	0	0	0	0	0	0	0	0	0	0	0	0	#DIV/0!	#DIV/0!	#DIV/0!
0	0	0	0	0	0	0	0	0	0	0	0	0	0	#DIV/0!	#DIV/0!	#DIV/0!
0	0	0	0	0	0	0	0	0	0	0	0	0	0	#DIV/0!	#DIV/0!	#DIV/0!
0	0	0	0	0	0	0	0	0	0	0	0	0	0	#DIV/0!	#DIV/0!	#DIV/0!
0	0	0	0	0	0	0	0	0	0	0	0	0	0	#DIV/0!	#DIV/0!	#DIV/0!
0	0	0	0	0	0	0	0	0	0	0	0	0	0	#DIV/0!	#DIV/0!	#DIV/0!
0	0	0	0	0	0	0	0	0	0	0	0	0	0	#DIV/0!	#DIV/0!	#DIV/0!
0	0	0	0	0	0	0	0	0	0	0	0	0	0	#DIV/0!	#DIV/0!	#DIV/0!
0	0	0	0	0	0	0	0	0	0	0	0	0	0	#DIV/0!	#DIV/0!	#DIV/0!
0	0	0	0	0	0	0	0	0	0	0	0	0	0	#DIV/0!	#DIV/0!	#DIV/0!
0	0	0	0	0	0	0	0	0	0	0	0	0	0	#DIV/0!	#DIV/0!	#DIV/0!
0	0	0	0	0	0	0	0	0	0	0	0	0	0	#DIV/0!	#DIV/0!	#DIV/0!
0	0	0	0	0	0	0	0	0	0	0	0	0	0	#DIV/0!	#DIV/0!	#DIV/0!
0	0	0	0	0	0	0	0	0	0	0	0	0	0	#DIV/0!	#DIV/0!	#DIV/0!
0	0	0	0	0	0	0	0	0	0	0	0	0	0	#DIV/0!	#DIV/0!	#DIV/0!
0	0	0	0	0	0	0	0	0	0	0	0	0	0	#DIV/0!	#DIV/0!	#DIV/0!
0	0	0	0	0	0	0	0	0	0	0	0	0	0	#DIV/0!	#DIV/0!	#DIV/0!
0	0	0	0	0	0	0	0	0	0	0	0	0	0	#DIV/0!	#DIV/0!	#DIV/0!
0	0	0	0	0	0	0	0	0	0	0	0	0	0	#DIV/0!	#DIV/0!	#DIV/0!
0	0	0	0	0	0	0	0	0	0	0	0	0	0	#DIV/0!	#DIV/0!	#DIV/0!
0	0	0	0	0	0	0	0	0	0	0	0	0	0	#DIV/0!	#DIV/0!	#DIV/0!
0	0	0	0	0	0	0	0	0	0	0	0	0	0	#DIV/0!	#DIV/0!	#DIV/0!
0	0	0	0	0	0	0	0	0	0	0	0	0	0	#DIV/0!	#DIV/0!	#DIV/0!
0	0	0	0	0	0	0	0	0	0	0	0	0	0	#DIV/0!	#DIV/0!	#DIV/0!
0	0	0	0	0	0	0	0	0	0	0	0	0	0	#DIV/0!	#DIV/0!	#DIV/0!
0	0	0	0	0	0	0	0	0	0	0	0	0	0	#DIV/0!	#DIV/0!	#DIV/0!
0	0	0	0	0	0	0	0	0	0	0	0	0	0	#DIV/0!	#DIV/0!	#DIV/0!
0	0	0	0	0	0	0	0	0	0	0	0	0	0	#DIV/0!	#DIV/0!	#DIV/0!
0	0	0	0	0	0	0	0	0	0	0	0	0	0	#DIV/0!	#DIV/0!	#DIV/0!
0	0	0	0	0	0	0	0	0	0	0	0	0	0	#DIV/0!	#DIV/0!	#DIV/0!
0	0	0	0	0	0	0	0	0	0	0	0	0	0	#DIV/0!	#DIV/0!	#DIV/0!
0	0	0	0	0	0	0	0	0	0	0	0	0	0	#DIV/0!	#DIV/0!	#DIV/0!
0	0	0	0	0	0	0	0	0	0	0	0	0	0	#DIV/0!	#DIV/0!	#DIV/0!
0	0	0	0	0	0	0	0	0	0	0	0	0	0	#DIV/0!	#DIV/0!	#DIV/0!
0	0	0	0	0	0	0	0	0	0	0	0	0	0	#DIV/0!	#DIV/0!	#DIV/0!
0	0	0	0	0	0	0	0	0	0	0	0	0	0	#DIV/0!	#DIV/0!	#DIV/0!
0	0	0	0	0	0	0	0	0	0	0	0	0	0	#DIV/0!	#DIV/0!	#DIV/0!
0	0	0	0	0	0	0	0	0	0	0	0	0	0	#DIV/0!	#DIV/0!	#DIV/0!
0	0	0	0	0	0	0	0	0	0	0	0	0	0	#DIV/0!	#DIV/0!	#DIV/0!
0	0	0	0	0	0	0	0	0	0	0	0	0	0	#DIV/0!	#DIV/0!	#DIV/0!
0	0	0	0	0	0	0	0	0	0	0	0	0	0	#DIV/0!	#DIV/0!	#DIV/0!
0	0	0	0	0	0	0	0	0	0	0	0	0	0	#DIV/0!	#DIV/0!	#DIV/0!
0	0	0	0	0	0	0	0	0	0	0	0	0	0	#DIV/0!	#DIV/0!	#DIV/0!
0	0	0	0	0	0	0	0	0	0	0	0	0	0	#DIV/0!	#DIV/0!	#DIV/0!
0	0	0	0	0	0	0	0	0	0	0	0	0	0	#DIV/0!	#DIV/0!	#DIV/0!
0	0	0	0	0	0	0	0	0	0	0	0	0	0	#DIV/0!	#DIV/0!	#DIV/0!
0	0	0	0	0	0	0	0	0	0	0	0	0	0	#DIV/0!	#DIV/0!	#DIV/0!
0	0	0	0	0	0	0	0	0	0	0	0	0	0	#DIV/0!	#DIV/0!	#DIV/0!
0	0	0	0	0	0	0	0	0	0	0	0	0	0	#DIV/0!	#DIV/0!	#DIV/0!
0	0	0	0	0	0	0	0	0	0	0	0	0	0	#DIV/0!	#DIV/0!	#DIV/0!
0	0	0	0	0	0	0	0	0	0	0	0	0	0	#DIV/0!	#DIV/0!	#DIV/0!
0	0	0	0	0	0	0	0	0	0	0	0	0	0	#DIV/0!	#DIV/0!	#DIV/0!
0	0	0	0	0	0	0	0	0	0	0	0	0	0	#DIV/0!	#DIV/0!	#DIV/0!
0	0	0	0	0	0	0	0	0	0	0	0	0	0	#DIV/0!	#DIV/0!	#DIV/0!
0	0	0	0	0	0	0	0	0	0	0	0	0	0	#DIV/0!	#DIV/0!	#DIV/0!
0	0	0	0	0	0	0	0	0	0	0	0	0	0	#DIV/0!	#DIV/0!	#DIV/0!
0	0	0	0	0	0	0	0	0	0	0	0	0	0	#DIV/0!	#DIV/0!	#DIV/0!
0	0	0	0	0	0	0	0	0	0	0	0	0	0	#DIV/0!	#DIV/0!	#DIV/0!
0	0	0	0	0	0	0	0	0	0	0	0	0	0	#DIV/0!	#DIV/0!	#DIV/0!
0	0	0	0	0	0	0	0	0	0	0	0	0	0	#DIV/0!	#DIV/0!	#DIV/0!
0	0	0	0	0	0	0	0	0	0	0	0	0	0	#DIV/0!	#DIV/0!	#DIV/0!
0	0	0	0	0	0	0	0	0	0	0	0	0	0	#DIV/0!	#DIV/0!	#DIV/0!
0	0	0	0	0	0	0	0	0	0	0	0	0	0	#DIV/0!	#DIV/0!	#DIV/0!
0	0	0	0	0	0	0	0	0	0	0	0	0	0	#DIV/0!	#DIV/0!	#DIV/0!
0	0	0	0	0	0	0	0	0	0	0	0	0	0	#DIV/0!	#DIV/0!	#DIV/0!
0	0	0	0	0	0	0	0	0	0	0	0	0	0	#DIV/0!	#DIV/0!	#DIV/0!
0	0	0	0	0	0	0	0	0	0	0	0	0	0	#DIV/0!	#DIV/0!	#DIV/0!
0	0	0	0	0	0	0	0	0	0	0	0	0	0	#DIV/0!	#DIV/0!	#DIV/0!
0	0	0	0	0	0	0	0	0	0	0	0	0	0	#DIV/0!	#DIV/0!	#DIV/0!
0	0	0	0	0	0	0	0	0	0	0	0	0	0	#DIV/0!	#DIV/0!	#DIV/0!
0	0	0	0	0	0	0	0	0	0	0	0	0	0	#DIV/0!	#DIV/0!	#DIV/0!
0	0	0	0	0	0	0	0	0	0	0	0	0	0	#DIV/0!	#DIV/0!	#DIV/0!
0	0	0	0	0	0	0	0	0	0	0	0	0	0	#DIV/0!	#DIV/0!	#DIV/0!
0	0	0	0	0	0	0	0	0	0	0	0	0	0	#DIV/0!	#DIV/0!	#DIV/0!
0	0	0	0	0	0	0	0	0	0	0	0	0	0	#DIV/0!	#DIV/0!	#DIV/0!
0	0	0	0	0	0	0	0	0	0	0	0	0	0	#DIV/0!	#DIV/0!	#DIV/0!
0	0	0	0	0	0	0	0	0	0	0	0	0	0	#DIV/0!	#DIV/0!	#DIV/0!
0	0	0	0	0	0	0	0	0	0	0	0	0	0	#DIV/0!	#DIV/0!	#DIV/0!
0	0	0	0	0	0	0	0	0	0	0	0	0	0	#DIV/0!	#DIV/0!	#DIV/0!
0	0	0	0	0	0	0	0	0	0	0	0	0	0	#DIV/0!	#DIV/0!	#DIV/0!
0	0	0	0	0	0	0	0	0	0	0	0	0	0	#DIV/0!	#DIV/0!	#DIV/0!
0	0	0	0	0	0	0	0	0	0	0	0	0	0	#DIV/0!	#DIV/0!	#DIV/0!
0	0	0	0	0	0	0	0	0	0	0	0	0	0	#DIV/0!	#DIV/0!	#DIV/0!
0	0	0	0	0	0	0	0	0	0	0	0	0	0	#DIV/0!	#DIV/0!	#DIV/0!
0	0	0	0	0	0	0	0	0	0	0	0	0	0	#DIV/0!	#DIV/0!	#DIV/0!
0	0	0	0	0	0	0	0	0	0	0	0	0	0	#DIV/0!	#DIV/0!	#DIV/0!
0	0	0	0	0	0	0	0	0	0	0	0	0	0	#DIV/0!	#DIV/0!	#DIV/0!
0	0	0	0	0	0	0	0	0	0	0	0	0	0	#DIV/0!	#DIV/0!	#DIV/0!
0	0	0	0	0	0	0	0	0	0	0	0	0	0	#DIV/0!	#DIV/0!	#DIV/0!
0	0	0	0	0	0	0	0	0	0	0	0	0	0	#DIV/0!	#DIV/0!	#DIV/0!
0	0	0	0	0	0	0	0	0	0	0	0	0	0	#DIV/0!	#DIV/0!	#DIV/0!
0	0	0	0	0	0	0	0	0	0	0	0	0	0	#DIV/0!	#DIV/0!	#DIV/0!
0	0	0	0	0	0	0	0	0	0	0	0	0	0	#DIV/0!	#DIV/0!	#DIV/0!
0	0	0	0	0	0	0	0	0	0	0	0	0	0	#DIV/0!	#DIV/0!	#DIV/0!
0	0	0	0	0	0	0	0	0	0	0	0	0	0	#DIV/0!	#DIV/0!	#DIV/0!
0	0	0	0	0	0	0	0	0	0	0	0	0	0	#DIV/0!	#DIV/0!	#DIV/0!
0	0	0	0	0	0	0	0	0	0	0	0	0	0	#DIV/0!	#DIV/0!	#DIV/0!
0	0	0	0	0	0	0	0	0	0	0	0	0	0	#DIV/0!	#DIV/0!	#DIV/0!
0	0	0	0	0	0	0	0	0	0	0	0	0	0	#DIV/0!	#DIV/0!	#DIV/0!
0	0	0	0	0	0	0	0	0	0	0	0	0	0	#DIV/0!	#DIV/0!	#DIV/0!
0	0	0	0	0	0	0	0	0	0	0	0	0	0	#DIV/0!	#DIV/0!	#DIV/0!
0	0	0	0	0	0	0	0	0	0	0	0	0	0	#DIV/0!	#DIV/0!	#DIV/0!
0	0	0	0	0	0	0	0	0	0	0	0	0	0	#DIV/0!	#DIV/0!	#DIV/0!
0	0	0	0	0	0	0	0	0	0	0	0	0	0	#DIV/0!	#DIV/0!	#DIV/0!
0	0	0	0	0	0	0	0	0	0	0	0	0	0	#DIV/0!	#DIV/0!	#DIV/0!
0	0	0	0	0	0	0	0	0	0	0	0	0	0	#DIV/0!	#DIV/0!	#DIV/0!
0	0	0	0	0	0	0	0	0	0	0	0	0	0	#DIV/0!	#DIV/0!	#DIV/0!
0	0	0	0	0	0	0	0	0	0	0	0	0	0	#DIV/0!	#DIV/0!	#DIV/0!
0	0	0	0	0	0	0	0	0	0	0	0	0	0	#DIV/0!	#DIV/0!	#DIV/0!
0	0	0	0	0	0	0	0	0	0	0	0	0	0	#DIV/0!	#DIV/0!	#DIV/0!
0	0	0	0	0	0	0	0	0	0	0	0	0	0	#DIV/0!	#DIV/0!	#DIV/0!
0	0	0	0	0	0	0	0	0	0	0	0	0	0	#DIV/0!	#DIV/0!	#DIV/0!
0	0	0	0	0	0	0	0	0	0	0	0	0	0	#DIV/0!	#DIV/0!	#DIV/0!
0	0	0	0	0	0	0	0	0	0	0	0	0	0	#DIV/0!	#DIV/0!	#DIV/0!
0	0	0	0	0	0	0	0	0	0	0	0	0	0	#DIV/0!	#DIV/0!	#DIV/0!
0	0	0	0	0	0	0	0	0	0	0	0	0	0	#DIV/0!	#DIV/0!	#DIV/0!
0	0	0	0	0	0	0	0	0	0	0	0	0	0	#DIV/0!	#DIV/0!	#DIV/0!
0	0	0	0	0	0	0	0	0	0	0	0	0	0	#DIV/0!	#DIV/0!	#DIV/0!
0	0	0	0	0	0	0	0	0	0	0	0	0	0	#DIV/0!	#DIV/0!	#DIV/0!
0	0	0	0	0	0	0	0	0	0	0	0	0	0	#DIV/0!	#DIV/0!	#DIV/0!
0	0	0	0	0	0	0	0	0	0	0	0	0	0	#DIV/0!	#DIV/0!	#DIV/0!
0	0	0	0	0	0	0	0	0	0	0	0	0	0	#DIV/0!	#DIV/0!	#DIV/0!
0	0	0	0	0	0	0	0	0	0	0	0	0	0	#DIV/0!	#DIV/0!	#DIV/0!
0	0	0	0	0	0	0	0	0	0	0	0	0	0	#DIV/0!	#DIV/0!	#DIV/0!
0	0	0	0	0	0	0	0	0	0	0	0	0	0	#DIV/0!	#DIV/0!	#DIV/0!
0	0	0	0	0	0	0	0	0	0	0	0	0	0	#DIV/0!	#DIV/0!	#DIV/0!
0	0	0	0	0	0	0	0	0	0	0	0	0	0	#DIV/0!	#DIV/0!	#DIV/0!
0	0	0	0	0	0	0	0	0	0	0	0	0	0	#DIV/0!	#DIV/0!	#DIV/0!
0	0	0	0	0	0	0	0	0	0	0	0	0	0	#DIV/0!	#DIV/0!	#DIV/0!
0	0	0	0	0	0	0	0	0	0	0	0	0	0	#DIV/0!	#DIV/0!	#DIV/0!
0	0	0	0	0	0	0	0	0	0	0	0	0	0	#DIV/0!	#DIV/0!	#DIV/0!
0	0	0	0	0	0	0	0	0	0	0	0	0	0	#DIV/0!	#DIV/0!	#DIV/0!
0	0	0	0	0	0	0	0	0	0	0	0	0	0	#DIV/0!	#DIV/0!	#DIV/0!
0	0	0	0	0	0	0	0	0	0	0	0	0	0	#DIV/0!	#DIV/0!	#DIV/0!
0	0	0	0	0	0	0	0	0	0	0	0	0	0	#DIV/0!	#DIV/0!	#DIV/0!
0	0	0	0	0	0	0	0	0	0	0	0	0	0	#DIV/0!	#DIV/0!	#DIV/0!
0	0	0	0	0	0	0	0	0	0	0	0	0	0	#DIV/0!	#DIV/0!	#DIV/0!
0	0	0	0	0	0	0	0	0	0	0	0	0	0	#DIV/0!	#DIV/0!	#DIV/0!
0	0	0	0	0	0	0	0	0	0	0	0	0	0	#DIV/0!	#DIV/0!	#DIV/0!
0	0	0	0	0	0	0	0	0	0	0	0	0	0	#DIV/0!	#DIV/0!	#DIV/0!
0	0	0	0	0	0	0	0	0	0	0	0	0	0	#DIV/0!	#DIV/0!	#DIV/0!
0	0	0	0	0	0	0	0	0	0	0	0	0	0	#DIV/0!	#DIV/0!	#DIV/0!
0	0	0	0	0	0	0	0	0	0	0	0	0	0	#DIV/0!	#DIV/0!	#DIV/0!
0	0	0	0	0	0	0	0	0	0	0	0	0	0	#DIV/0!	#DIV/0!	#DIV/0!
0	0	0	0	0	0	0	0	0	0	0	0	0	0	#DIV/0!	#DIV/0!	#DIV/0!
0	0	0	0	0	0	0	0	0	0	0	0	0	0	#DIV/0!	#DIV/0!	#DIV/0!
0	0	0	0	0	0	0	0	0	0	0	0	0	0	#DIV/0!	#DIV/0!	#DIV/0!
0	0	0	0	0	0	0	0	0	0	0	0	0	0	#DIV/0!	#DIV/0!	#DIV/0!
0	0	0	0	0	0	0	0	0	0	0	0	0	0	#DIV/0!	#DIV/0!	#DIV/0!
0	0	0	0	0	0	0	0	0	0	0	0	0	0	#DIV/0!	#DIV/0!	#DIV/0!
0	0	0	0	0	0	0	0	0	0	0	0	0	0	#DIV/0!	#DIV/0!	#DIV/0!
0	0	0	0	0	0	0	0	0	0	0	0	0	0	#DIV/0!	#DIV/0!	#DIV/0!
0	0	0	0	0	0	0	0	0	0	0	0	0	0	#DIV/0!	#DIV/0!	#DIV/0!
0	0	0	0	0	0	0	0	0	0	0	0	0	0	#DIV/0!	#DIV/0!	#DIV/0!
0	0	0	0	0	0	0	0	0	0	0	0	0	0	#DIV/0!	#DIV/0!	#DIV/0!
0	0	0	0	0	0	0	0	0	0	0	0	0	0	#DIV/0!	#DIV/0!	#DIV/0!
0	0	0	0	0	0	0	0	0	0	0	0	0	0	#DIV/0!	#DIV/0!	#DIV/0!
0	0	0	0	0	0	0	0	0	0	0	0	0	0	#DIV/0!	#DIV/0!	#DIV/0!
0	0	0	0	0	0	0	0	0	0	0	0	0	0	#DIV/0!	#DIV/0!	#DIV/0!
0	0	0	0	0	0	0	0	0	0	0	0	0	0	#DIV/0!	#DIV/0!	#DIV/0!
0	0	0	0	0	0	0	0	0	0	0	0	0	0	#DIV/0!	#DIV/0!	#DIV/0!
0	0	0	0	0	0	0	0	0	0	0	0	0	0	#DIV/0!	#DIV/0!	#DIV/0!
0	0	0	0	0	0	0	0	0	0	0	0	0	0	#DIV/0!	#DIV/0!	#DIV/0!
0	0	0	0	0	0	0	0	0	0	0	0	0	0	#DIV/0!	#DIV/0!	#DIV/0!
0	0	0	0	0	0	0	0	0	0	0	0	0	0	#DIV/0!	#DIV/0!	#DIV/0!
0	0	0	0	0	0	0	0	0	0	0	0	0	0	#DIV/0!	#DIV/0!	#DIV/0!
0	0	0	0	0	0	0	0	0	0	0	0	0	0	#DIV/0!	#DIV/0!	#DIV/0!
0	0	0	0	0	0	0	0	0	0	0	0	0	0	#DIV/0!	#DIV/0!	#DIV/0!
0	0	0	0	0	0	0	0	0	0	0	0	0	0	#DIV/0!	#DIV/0!	#DIV/0!
0	0	0	0	0	0	0	0	0	0	0	0	0	0	#DIV/0!	#DIV/0!	#DIV/0!
0	0	0	0	0	0	0	0	0	0	0	0	0	0	#DIV/0!	#DIV/0!	#DIV/0!
0	0	0	0	0	0	0	0	0	0	0	0	0	0	#DIV/0!	#DIV/0!	#DIV/0!
0	0	0	0	0	0	0	0	0	0	0	0	0	0	#DIV/0!	#DIV/0!	#DIV/0!
0	0	0	0	0	0	0	0	0	0	0	0	0	0	#DIV/0!	#DIV/0!	#DIV/0!
0	0	0	0	0	0	0	0	0	0	0	0	0	0	#DIV/0!	#DIV/0!	#DIV/0!
0	0	0	0	0	0	0	0	0	0	0	0	0	0	#DIV/0!	#DIV/0!	#DIV/0!
0	0	0	0	0	0	0	0	0	0	0	0	0	0	#DIV/0!	#DIV/0!	#DIV/0!
0	0	0	0	0	0	0	0	0	0	0	0	0	0	#DIV/0!	#DIV/0!	#DIV/0!
0	0	0	0	0	0	0	0	0	0	0	0	0	0	#DIV/0!	#DIV/0!	#DIV/0!
0	0	0	0	0	0	0	0	0	0	0	0	0	0	#DIV/0!	#DIV/0!	#DIV/0!
0	0	0	0	0	0	0	0	0	0	0	0	0	0	#DIV/0!	#DIV/0!	#DIV/0!
0	0	0	0	0	0	0	0	0	0	0	0	0	0	#DIV/0!	#DIV/0!	#DIV/0!
0	0	0	0	0	0	0	0	0	0	0	0	0	0	#DIV/0!	#DIV/0!	#DIV/0!
0	0	0	0	0	0	0	0	0	0	0	0	0	0	#DIV/0!	#DIV/0!	#DIV/0!
0	0	0	0	0	0	0	0	0	0	0	0	0	0	#DIV/0!	#DIV/0!	#DIV/0!
0	0	0	0	0	0	0	0	0	0	0	0	0	0	#DIV/0!	#DIV/0!	#DIV/0!
0	0	0	0	0	0	0	0	0	0	0	0	0	0	#DIV/0!	#DIV/0!	#DIV/0!
0	0	0	0	0	0	0	0	0	0	0	0	0	0	#DIV/0!	#DIV/0!	#DIV/0!
0	0	0	0	0	0	0	0	0	0	0	0	0	0	#DIV/0!	#DIV/0!	#DIV/0!
0	0	0	0	0	0	0	0	0	0	0	0	0	0	#DIV/0!	#DIV/0!	#DIV/0!
0	0	0	0	0	0	0	0	0	0	0	0	0	0	#DIV/0!	#DIV/0!	#DIV/0!
0	0	0	0	0	0	0	0	0	0	0	0	0	0	#DIV/0!	#DIV/0!	#DIV/0!
0	0	0	0	0	0	0	0	0	0	0	0	0	0	#DIV/0!	#DIV/0!	#DIV/0!
0	0	0	0	0	0	0	0	0	0	0	0	0	0	#DIV/0!	#DIV/0!	#DIV/0!
0	0	0	0	0	0	0	0	0	0	0	0	0	0	#DIV/0!	#DIV/0!	#DIV/0!
0	0	0	0	0	0	0	0	0	0	0	0	0	0	#DIV/0!	#DIV/0!	#DIV/0!
0	0	0	0	0	0	0	0	0	0	0	0	0	0	#DIV/0!	#DIV/0!	#DIV/0!
0	0	0	0	0	0	0	0	0	0	0	0	0	0	#DIV/0!	#DIV/0!	#DIV/0!
0	0	0	0	0	0	0	0	0	0	0	0	0	0	#DIV/0!	#DIV/0!	#DIV/0!
0	0	0	0	0	0	0	0	0	0	0	0	0	0	#DIV/0!	#DIV/0!	#DIV/0!
0	0	0	0	0	0	0	0	0	0	0	0	0	0	#DIV/0!	#DIV/0!	#DIV/0!
0	0	0	0	0	0	0	0	0	0	0	0	0	0	#DIV/0!	#DIV/0!	#DIV/0!
0	0	0	0	0	0	0	0	0	0	0	0	0	0	#DIV/0!	#DIV/0!	#DIV/0!
0	0	0	0	0	0	0	0	0	0	0	0	0	0	#DIV/0!	#DIV/0!	#DIV/0!
0	0	0	0	0	0	0	0	0	0	0	0	0	0	#DIV/0!	#DIV/0!	#DIV/0!
0	0	0	0	0	0	0	0	0	0	0	0	0	0	#DIV/0!	#DIV/0!	#DIV/0!
0	0	0	0	0	0	0	0	0	0	0	0	0	0	#DIV/0!	#DIV/0!	#DIV/0!
0	0	0	0	0	0	0	0	0	0	0	0	0	0	#DIV/0!	#DIV/0!	#DIV/0!
0	0	0	0	0	0	0	0	0	0	0	0	0	0	#DIV/0!	#DIV/0!	#DIV/0!
0	0	0	0	0	0	0	0	0	0	0	0	0	0	#DIV/0!	#DIV/0!	#DIV/0!
0	0	0	0	0	0	0	0	0	0	0	0	0	0	#DIV/0!	#DIV/0!	#DIV/0!
0	0	0	0	0	0	0	0	0	0	0	0	0	0	#DIV/0!	#DIV/0!	#DIV/0!
0	0	0	0	0	0	0	0	0	0	0	0	0	0	#DIV/0!	#DIV/0!	#DIV/0!
0	0	0	0	0	0	0	0	0	0	0	0	0	0	#DIV/0!	#DIV/0!	#DIV/0!
0	0	0	0	0	0	0	0	0	0	0	0	0	0	#DIV/0!	#DIV/0!	#DIV/0!
0	0	0	0	0	0	0	0	0	0	0	0	0	0	#DIV/0!	#DIV/0!	#DIV/0!
0	0	0	0	0	0	0	0	0	0	0	0	0	0	#DIV/0!	#DIV/0!	#DIV/0!
0	0	0	0	0	0	0	0	0	0	0	0	0	0	#DIV/0!	#DIV/0!	#DIV/0!
0	0	0	0	0	0	0	0	0	0	0	0	0	0	#DIV/0!	#DIV/0!	#DIV/0!
0	0	0	0	0	0	0	0	0	0	0	0	0	0	#DIV/0!	#DIV/0!	#DIV/0!
0	0	0	0	0	0	0	0	0	0	0	0	0	0	#DIV/0!	#DIV/0!	#DIV/0!
0	0	0	0	0	0	0	0	0	0	0	0	0	0	#DIV/0!	#DIV/0!	#DIV/0!
0	0	0	0	0	0	0	0	0	0	0	0	0	0	#DIV/0!	#DIV/0!	#DIV/0!
0	0	0	0	0	0	0	0	0	0	0	0	0	0	#DIV/0!	#DIV/0!	#DIV/0!
0	0	0	0	0	0	0	0	0	0	0	0	0	0	#DIV/0!	#DIV/0!	#DIV/0!
0	0	0	0	0	0	0	0	0	0	0	0	0	0	#DIV/0!	#DIV/0!	#DIV/0!
0	0	0	0	0	0	0	0	0	0	0	0	0	0	#DIV/0!	#DIV/0!	#DIV/0!
0	0	0	0	0	0	0	0	0	0	0	0	0	0	#DIV/0!	#DIV/0!	#DIV/0!
0	0	0	0	0	0	0	0	0	0	0	0	0	0	#DIV/0!	#DIV/0!	#DIV/0!
0	0	0	0	0	0	0	0	0	0	0	0	0	0	#DIV/0!	#DIV/0!	#DIV/0!
0	0	0	0	0	0	0	0	0	0	0	0	0	0	#DIV/0!	#DIV/0!	#DIV/0!
0	0	0	0	0	0	0	0	0	0	0	0	0	0	#DIV/0!	#DIV/0!	#DIV/0!
0	0	0	0	0	0	0	0	0	0	0	0	0	0	#DIV/0!	#DIV/0!	#DIV/0!
0	0	0	0	0	0	0	0	0	0	0	0	0	0	#DIV/0!	#DIV/0!	#DIV/0!
0	0	0	0	0	0	0	0	0	0	0	0	0	0	#DIV/0!	#DIV/0!	#DIV/0!
0	0	0	0	0	0	0	0	0	0	0	0	0	0	#DIV/0!	#DIV/0!	#DIV/0!
0	0	0	0	0	0	0	0	0	0	0	0	0	0	#DIV/0!	#DIV/0!	#DIV/0!
0	0	0	0	0	0	0	0	0	0	0	0	0	0	#DIV/0!	#DIV/0!	#DIV/0!
0	0	0	0	0	0	0	0	0	0	0	0	0	0	#DIV/0!	#DIV/0!	#DIV/0!
0	0	0	0	0	0	0	0	0	0	0	0	0	0	#DIV/0!	#DIV/0!	#DIV/0!
0	0	0	0	0	0	0	0	0	0	0	0	0	0	#DIV/0!	#DIV/0!	#DIV/0!
0	0	0	0	0	0	0	0	0	0	0	0	0	0	#DIV/0!	#DIV/0!	#DIV/0!
0	0	0	0	0	0	0	0	0	0	0	0	0	0	#DIV/0!	#DIV/0!	#DIV/0!
0	0	0	0	0	0	0	0	0	0	0	0	0	0	#DIV/0!	#DIV/0!	#DIV/0!
0	0	0	0	0	0	0	0	0	0	0	0	0	0	#DIV/0!	#DIV/0!	#DIV/0!
0	0	0	0	0	0	0	0	0	0	0	0	0	0	#DIV/0!	#DIV/0!	#DIV/0!
0	0	0	0	0	0	0	0	0	0	0	0	0	0	#DIV/0!	#DIV/0!	#DIV/0!
0	0	0	0	0	0	0	0	0	0	0	0	0	0	#DIV/0!	#DIV/0!	#DIV/0!
0	0	0	0	0	0	0	0	0	0	0	0	0	0	#DIV/0!	#DIV/0!	#DIV/0!
0	0	0	0	0	0	0	0	0	0	0	0	0	0	#DIV/0!	#DIV/0!	#DIV/0!
0	0	0	0	0	0	0	0	0	0	0	0	0	0	#DIV/0!	#DIV/0!	#DIV/0!
0	0	0	0	0	0	0	0	0	0	0	0	0	0	#DIV/0!	#DIV/0!	#DIV/0!
0	0	0	0	0	0	0	0	0	0	0	0	0	0	#DIV/0!	#DIV/0!	#DIV/0!
0	0	0	0	0	0	0	0	0	0	0	0	0	0	#DIV/0!	#DIV/0!	#DIV/0!
0	0	0	0	0	0	0	0	0	0	0	0	0	0	#DIV/0!	#DIV/0!	#DIV/0!
0	0	0	0	0	0	0	0	0	0	0	0	0	0	#DIV/0!	#DIV/0!	#DIV/0!
0	0	0	0	0	0	0	0	0	0	0	0	0	0	#DIV/0!	#DIV/0!	#DIV/0!
0	0	0	0	0	0	0	0	0	0	0	0	0	0	#DIV/0!	#DIV/0!	#DIV/0!
0	0	0	0	0	0	0	0	0	0	0	0	0	0	#DIV/0!	#DIV/0!	#DIV/0!
0	0	0	0	0	0	0	0	0	0	0	0	0	0	#DIV/0!	#DIV/0!	#DIV/0!
0	0	0	0	0	0	0	0	0	0	0	0	0	0	#DIV/0!	#DIV/0!	#DIV/0!
0	0	0	0	0	0	0	0	0	0	0	0	0	0	#DIV/0!	#DIV/0!	#DIV/0!
0	0	0	0	0	0	0	0	0	0	0	0	0	0	#DIV/0!	#DIV/0!	#DIV/0!
0	0	0	0	0	0	0	0	0	0	0	0	0	0	#DIV/0!	#DIV/0!	#DIV/0!
0	0	0	0	0	0	0	0	0	0	0	0	0	0	#DIV/0!	#DIV/0!	#DIV/0!
0	0	0	0	0	0	0	0	0	0	0	0	0	0	#DIV/0!	#DIV/0!	#DIV/0!
0	0	0	0	0	0	0	0	0	0	0	0	0	0	#DIV/0!	#DIV/0!	#DIV/0!
0	0	0	0	0	0	0	0	0	0	0	0	0	0	#DIV/0!	#DIV/0!	#DIV/0!
0	0	0	0	0	0	0	0	0	0	0	0	0	0	#DIV/0!	#DIV/0!	#DIV/0!
0	0	0	0	0	0	0	0	0	0	0	0	0	0	#DIV/0!	#DIV/0!	#DIV/0!
0	0	0	0	0	0	0	0	0	0	0	0	0	0	#DIV/0!	#DIV/0!	#DIV/0!
0	0	0	0	0	0	0	0	0	0	0	0	0	0	#DIV/0!	#DIV/0!	#DIV/0!
0	0	0	0	0	0	0	0	0	0	0	0	0	0	#DIV/0!	#DIV/0!	#DIV/0!
0	0	0	0	0	0	0	0	0	0	0	0	0	0	#DIV/0!	#DIV/0!	#DIV/0!
0	0	0	0	0	0	0	0	0	0	0	0	0	0	#DIV/0!	#DIV/0!	#DIV/0!
0	0	0	0	0	0	0	0	0	0	0	0	0	0	#DIV/0!	#DIV/0!	#DIV/0!
0	0	0	0	0	0	0	0	0	0	0	0	0	0	#DIV/0!	#DIV/0!	#DIV/0!
0	0	0	0	0	0	0	0	0	0	0	0	0	0	#DIV/0!	#DIV/0!	#DIV/0!
0	0	0	0	0	0	0	0	0	0	0	0	0	0	#DIV/0!	#DIV/0!	#DIV/0!
0	0	0	0	0	0	0	0	0	0	0	0	0	0	#DIV/0!	#DIV/0!	#DIV/0!
0	0	0	0	0	0	0	0	0	0	0	0	0	0	#DIV/0!	#DIV/0!	#DIV/0!
0	0	0	0	0	0	0	0	0	0	0	0	0	0	#DIV/0!	#DIV/0!	#DIV/0!
0	0	0	0	0	0	0	0	0	0	0	0	0	0	#DIV/0!	#DIV/0!	#DIV/0!
0	0	0	0	0	0	0	0	0	0	0	0	0	0	#DIV/0!	#DIV/0!	#DIV/0!
0	0	0	0	0	0	0	0	0	0	0	0	0	0	#DIV/0!	#DIV/0!	#DIV/0!
0	0	0	0	0	0	0	0	0	0	0	0	0	0	#DIV/0!	#DIV/0!	#DIV/0!
0	0	0	0	0	0	0	0	0	0	0	0	0	0	#DIV/0!	#DIV/0!	#DIV/0!
0	0	0	0	0	0	0	0	0	0	0	0	0	0	#DIV/0!	#DIV/0!	#DIV/0!
0	0	0	0	0	0	0	0	0	0	0	0	0	0	#DIV/0!	#DIV/0!	#DIV/0!
0	0	0	0	0	0	0	0	0	0	0	0	0	0	#DIV/0!	#DIV/0!	#DIV/0!
0	0	0	0	0	0	0	0	0	0	0	0	0	0	#DIV/0!	#DIV/0!	#DIV/0!
0	0	0	0	0	0	0	0	0	0	0	0	0	0	#DIV/0!	#DIV/0!	#DIV/0!
0	0	0	0	0	0	0	0	0	0	0	0	0	0	#DIV/0!	#DIV/0!	#DIV/0!
0	0	0	0	0	0	0	0	0	0	0	0	0	0	#DIV/0!	#DIV/0!	#DIV/0!
0	0	0	0	0	0	0	0	0	0	0	0	0	0	#DIV/0!	#DIV/0!	#DIV/0!
0	0	0	0	0	0	0	0	0	0	0	0	0	0	#DIV/0!	#DIV/0!	#DIV/0!
0	0	0	0	0	0	0	0	0	0	0	0	0	0	#DIV/0!	#DIV/0!	#DIV/0!
0	0	0	0	0	0	0	0	0	0	0	0	0	0	#DIV/0!	#DIV/0!	#DIV/0!
0	0	0	0	0	0	0	0	0	0	0	0	0	0	#DIV/0!	#DIV/0!	#DIV/0!
0	0	0	0	0	0	0	0	0	0	0	0	0	0	#DIV/0!	#DIV/0!	#DIV/0!
0	0	0	0	0	0	0	0	0	0	0	0	0	0	#DIV/0!	#DIV/0!	#DIV/0!
0	0	0	0	0	0	0	0	0	0	0	0	0	0	#DIV/0!	#DIV/0!	#DIV/0!
0	0	0	0	0	0	0	0	0	0	0	0	0	0	#DIV/0!	#DIV/0!	#DIV/0!
0	0	0	0	0	0	0	0	0	0	0	0	0	0	#DIV/0!	#DIV/0!	#DIV/0!
0	0	0	0	0	0	0	0	0	0	0	0	0	0	#DIV/0!	#DIV/0!	#DIV/0!
0	0	0	0	0	0	0	0	0	0	0	0	0	0	#DIV/0!	#DIV/0!	#DIV/0!
0	0	0	0	0	0	0	0	0	0	0	0	0	0	#DIV/0!	#DIV/0!	#DIV/0!
0	0	0	0	0	0	0	0	0	0	0	0	0	0	#DIV/0!	#DIV/0!	#DIV/0!
0	0	0	0	0	0	0	0	0	0	0	0	0	0	#DIV/0!	#DIV/0!	#DIV/0!
0	0	0	0	0	0	0	0	0	0	0	0	0	0	#DIV/0!	#DIV/0!	#DIV/0!
0	0	0	0	0	0	0	0	0	0	0	0	0	0	#DIV/0!	#DIV/0!	#DIV/0!
0	0	0	0	0	0	0	0	0	0	0	0	0	0	#DIV/0!	#DIV/0!	#DIV/0!
0	0	0	0	0	0	0	0	0	0	0	0	0	0	#DIV/0!	#DIV/0!	#DIV/0!
0	0	0	0	0	0	0	0	0	0	0	0	0	0	#DIV/0!	#DIV/0!	#DIV/0!
0	0	0	0	0	0	0	0	0	0	0	0	0	0	#DIV/0!	#DIV/0!	#DIV/0!
0	0	0	0	0	0	0	0	0	0	0	0	0	0	#DIV/0!	#DIV/0!	#DIV/0!
0	0	0	0	0	0	0	0	0	0	0	0	0	0	#DIV/0!	#DIV/0!	#DIV/0!
0	0	0	0	0	0	0	0	0	0	0	0	0	0	#DIV/0!	#DIV/0!	#DIV/0!
0	0	0	0	0	0	0	0	0	0	0	0	0	0	#DIV/0!	#DIV/0!	#DIV/0!
0	0	0	0	0	0	0	0	0	0	0	0	0	0	#DIV/0!	#DIV/0!	#DIV/0!
0	0	0	0	0	0	0	0	0	0	0	0	0	0	#DIV/0!	#DIV/0!	#DIV/0!
0	0	0	0	0	0	0	0	0	0	0	0	0	0	#DIV/0!	#DIV/0!	#DIV/0!
0	0	0	0	0	0	0	0	0	0	0	0	0	0	#DIV/0!	#DIV/0!	#DIV/0!
0	0	0	0	0	0	0	0	0	0	0	0	0	0	#DIV/0!	#DIV/0!	#DIV/0!
0	0	0	0	0	0	0	0	0	0	0	0	0	0	#DIV/0!	#DIV/0!	#DIV/0!
0	0	0	0	0	0	0	0	0	0	0	0	0	0	#DIV/0!	#DIV/0!	#DIV/0!
0	0	0	0	0	0	0	0	0	0	0	0	0	0	#DIV/0!	#DIV/0!	#DIV/0!
0	0	0	0	0	0	0	0	0	0	0	0	0	0	#DIV/0!	#DIV/0!	#DIV/0!
0	0	0	0	0	0	0	0	0	0	0	0	0	0	#DIV/0!	#DIV/0!	#DIV/0!
0	0	0	0	0	0	0	0	0	0	0	0	0	0	#DIV/0!	#DIV/0!	#DIV/0!
0	0	0	0	0	0	0	0	0	0	0	0	0	0	#DIV/0!	#DIV/0!	#DIV/0!
0	0	0	0	0	0	0	0	0	0	0	0	0	0	#DIV/0!	#DIV/0!	#DIV/0!
0	0	0	0	0	0	0	0	0	0	0	0	0	0	#DIV/0!	#DIV/0!	#DIV/0!
0	0	0	0	0	0	0	0	0	0	0	0	0	0	#DIV/0!	#DIV/0!	#DIV/0!
0	0	0	0	0	0	0	0	0	0	0	0	0	0	#DIV/0!	#DIV/0!	#DIV/0!
0	0	0	0	0	0	0	0	0	0	0	0	0	0	#DIV/0!	#DIV/0!	#DIV/0!
0	0	0	0	0	0	0	0	0	0	0	0	0	0	#DIV/0!	#DIV/0!	#DIV/0!
0	0	0	0	0	0	0	0	0	0	0	0	0	0	#DIV/0!	#DIV/0!	#DIV/0!
0	0	0	0	0	0	0	0	0	0	0	0	0	0	#DIV/0!	#DIV/0!	#DIV/0!
0	0	0	0	0	0	0	0	0	0	0	0	0	0	#DIV/0!	#DIV/0!	#DIV/0!
0	0	0	0	0	0	0	0	0	0	0	0	0	0	#DIV/0!	#DIV/0!	#DIV/0!
0	0	0	0	0	0	0	0	0	0	0	0	0	0	#DIV/0!	#DIV/0!	#DIV/0!
0	0	0	0	0	0	0	0	0	0	0	0	0	0	#DIV/0!	#DIV/0!	#DIV/0!
0	0	0	0	0	0	0	0	0	0	0	0	0	0	#DIV/0!	#DIV/0!	#DIV/0!
0	0	0	0	0	0	0	0	0	0	0	0	0	0	#DIV/0!	#DIV/0!	#DIV/0!
0	0	0	0	0	0	0	0	0	0	0	0	0	0	#DIV/0!	#DIV/0!	#DIV/0!
0	0	0	0	0	0	0	0	0	0	0	0	0	0	#DIV/0!	#DIV/0!	#DIV/0!
0	0	0	0	0	0	0	0	0	0	0	0	0	0	#DIV/0!	#DIV/0!	#DIV/0!
0	0	0	0	0	0	0	0	0	0	0	0	0	0	#DIV/0!	#DIV/0!	#DIV/0!
0	0	0	0	0	0	0	0	0	0	0	0	0	0	#DIV/0!	#DIV/0!	#DIV/0!
0	0	0	0	0	0	0	0	0	0	0	0	0	0	#DIV/0!	#DIV/0!	#DIV/0!
0	0	0	0	0	0	0	0	0	0	0	0	0	0	#DIV/0!	#DIV/0!	#DIV/0!
0	0	0	0	0	0	0	0	0	0	0	0	0	0	#DIV/0!	#DIV/0!	#DIV/0!
0	0	0	0	0	0	0	0	0	0	0	0	0	0	#DIV/0!	#DIV/0!	#DIV/0!
0	0	0	0	0	0	0	0	0	0	0	0	0	0	#DIV/0!	#DIV/0!	#DIV/0!
0	0	0	0	0	0	0	0	0	0	0	0	0	0	#DIV/0!	#DIV/0!	#DIV/0!
0	0	0	0	0	0	0	0	0	0	0	0	0	0	#DIV/0!	#DIV/0!	#DIV/0!
0	0	0	0	0	0	0	0	0	0	0	0	0	0	#DIV/0!	#DIV/0!	#DIV/0!
0	0	0	0	0	0	0	0	0	0	0	0	0	0	#DIV/0!	#DIV/0!	#DIV/0!
0	0	0	0	0	0	0	0	0	0	0	0	0	0	#DIV/0!	#DIV/0!	#DIV/0!
0	0	0	0	0	0	0	0	0	0	0	0	0	0	#DIV/0!	#DIV/0!	#DIV/0!
0	0	0	0	0	0	0	0	0	0	0	0	0	0	#DIV/0!	#DIV/0!	#DIV/0!
0	0	0	0	0	0	0	0	0	0	0	0	0	0	#DIV/0!	#DIV/0!	#DIV/0!
0	0	0	0	0	0	0	0	0	0	0	0	0	0	#DIV/0!	#DIV/0!	#DIV/0!
0	0	0	0	0	0	0	0	0	0	0	0	0	0	#DIV/0!	#DIV/0!	#DIV/0!
0	0	0	0	0	0	0	0	0	0	0	0	0	0	#DIV/0!	#DIV/0!	#DIV/0!
0	0	0	0	0	0	0	0	0	0	0	0	0	0	#DIV/0!	#DIV/0!	#DIV/0!
0	0	0	0	0	0	0	0	0	0	0	0	0	0	#DIV/0!	#DIV/0!	#DIV/0!
0	0	0	0	0	0	0	0	0	0	0	0	0	0	#DIV/0!	#DIV/0!	#DIV/0!
0	0	0	0	0	0	0	0	0	0	0	0	0	0	#DIV/0!	#DIV/0!	#DIV/0!
0	0	0	0	0	0	0	0	0	0	0	0	0	0	#DIV/0!	#DIV/0!	#DIV/0!
0	0	0	0	0	0	0	0	0	0	0	0	0	0	#DIV/0!	#DIV/0!	#DIV/0!
0	0	0	0	0	0	0	0	0	0	0	0	0	0	#DIV/0!	#DIV/0!	#DIV/0!
0	0	0	0	0	0	0	0	0	0	0	0	0	0	#DIV/0!	#DIV/0!	#DIV/0!
0	0	0	0	0	0	0	0	0	0	0	0	0	0	#DIV/0!	#DIV/0!	#DIV/0!
0	0	0	0	0	0	0	0	0	0	0	0	0	0	#DIV/0!	#DIV/0!	#DIV/0!
0	0	0	0	0	0	0	0	0	0	0	0	0	0	#DIV/0!	#DIV/0!	#DIV/0!
0	0	0	0	0	0	0	0	0	0	0	0	0	0	#DIV/0!	#DIV/0!	#DIV/0!
0	0	0	0	0	0	0	0	0	0	0	0	0	0	#DIV/0!	#DIV/0!	#DIV/0!
0	0	0	0	0	0	0	0	0	0	0	0	0	0	#DIV/0!	#DIV/0!	#DIV/0!
0	0	0	0	0	0	0	0	0	0	0	0	0	0	#DIV/0!	#DIV/0!	#DIV/0!
0	0	0	0	0	0	0	0	0	0	0	0	0	0	#DIV/0!	#DIV/0!	#DIV/0!
0	0	0	0	0	0	0	0	0	0	0	0	0	0	#DIV/0!	#DIV/0!	#DIV/0!
0	0	0	0	0	0	0	0	0	0	0	0	0	0	#DIV/0!	#DIV/0!	#DIV/0!
0	0	0	0	0	0	0	0	0	0	0	0	0	0	#DIV/0!	#DIV/0!	#DIV/0!
0	0	0	0	0	0	0	0	0	0	0	0	0	0	#DIV/0!	#DIV/0!	#DIV/0!
0	0	0	0	0	0	0	0	0	0	0	0	0	0	#DIV/0!	#DIV/0!	#DIV/0!
0	0	0	0	0	0	0	0	0	0	0	0	0	0	#DIV/0!	#DIV/0!	#DIV/0!
0	0	0	0	0	0	0	0	0	0	0	0	0	0	#DIV/0!	#DIV/0!	#DIV/0!
0	0	0	0	0	0	0	0	0	0	0	0	0	0	#DIV/0!	#DIV/0!	#DIV/0!
0	0	0	0	0	0	0	0	0	0	0	0	0	0	#DIV/0!	#DIV/0!	#DIV/0!
0	0	0	0	0	0	0	0	0	0	0	0	0	0	#DIV/0!	#DIV/0!	#DIV/0!
0	0	0	0	0	0	0	0	0	0	0	0	0	0	#DIV/0!	#DIV/0!	#DIV/0!
0	0	0	0	0	0	0	0	0	0	0	0	0	0	#DIV/0!	#DIV/0!	#DIV/0!
0	0	0	0	0	0	0	0	0	0	0	0	0	0	#DIV/0!	#DIV/0!	#DIV/0!
0	0	0	0	0	0	0	0	0	0	0	0	0	0	#DIV/0!	#DIV/0!	#DIV/0!
0	0	0	0	0	0	0	0	0	0	0	0	0	0	#DIV/0!	#DIV/0!	#DIV/0!
0	0	0	0	0	0	0	0	0	0	0	0	0	0	#DIV/0!	#DIV/0!	#DIV/0!
0	0	0	0	0	0	0	0	0	0	0	0	0	0	#DIV/0!	#DIV/0!	#DIV/0!
0	0	0	0	0	0	0	0	0	0	0	0	0	0	#DIV/0!	#DIV/0!	#DIV/0!
0	0	0	0	0	0	0	0	0	0	0	0	0	0	#DIV/0!	#DIV/0!	#DIV/0!
0	0	0	0	0	0	0	0	0	0	0	0	0	0	#DIV/0!	#DIV/0!	#DIV/0!
0	0	0	0	0	0	0	0	0	0	0	0	0	0	#DIV/0!	#DIV/0!	#DIV/0!
0	0	0	0	0	0	0	0	0	0	0	0	0	0	#DIV/0!	#DIV/0!	#DIV/0!
0	0	0	0	0	0	0	0	0	0	0	0	0	0	#DIV/0!	#DIV/0!	#DIV/0!
0	0	0	0	0	0	0	0	0	0	0	0	0	0	#DIV/0!	#DIV/0!	#DIV/0!
0	0	0	0	0	0	0	0	0	0	0	0	0	0	#DIV/0!	#DIV/0!	#DIV/0!
0	0	0	0	0	0	0	0	0	0	0	0	0	0	#DIV/0!	#DIV/0!	#DIV/0!
0	0	0	0	0	0	0	0	0	0	0	0	0	0	#DIV/0!	#DIV/0!	#DIV/0!
0	0	0	0	0	0	0	0	0	0	0	0	0	0	#DIV/0!	#DIV/0!	#DIV/0!
0	0	0	0	0	0	0	0	0	0	0	0	0	0	#DIV/0!	#DIV/0!	#DIV/0!
0	0	0	0	0	0	0	0	0	0	0	0	0	0	#DIV/0!	#DIV/0!	#DIV/0!
0	0	0	0	0	0	0	0	0	0	0	0	0	0	#DIV/0!	#DIV/0!	#DIV/0!
0	0	0	0	0	0	0	0	0	0	0	0	0	0	#DIV/0!	#DIV/0!	#DIV/0!
0	0	0	0	0	0	0	0	0	0	0	0	0	0	#DIV/0!	#DIV/0!	#DIV/0!
0	0	0	0	0	0	0	0	0	0	0	0	0	0	#DIV/0!	#DIV/0!	#DIV/0!
0	0	0	0	0	0	0	0	0	0	0	0	0	0	#DIV/0!	#DIV/0!	#DIV/0!
0	0	0	0	0	0	0	0	0	0	0	0	0	0	#DIV/0!	#DIV/0!	#DIV/0!
0	0	0	0	0	0	0	0	0	0	0	0	0	0	#DIV/0!	#DIV/0!	#DIV/0!
0	0	0	0	0	0	0	0	0	0	0	0	0	0	#DIV/0!	#DIV/0!	#DIV/0!
0	0	0	0	0	0	0	0	0	0	0	0	0	0	#DIV/0!	#DIV/0!	#DIV/0!
0	0	0	0	0	0	0	0	0	0	0	0	0	0	#DIV/0!	#DIV/0!	#DIV/0!
0	0	0	0	0	0	0	0	0	0	0	0	0	0	#DIV/0!	#DIV/0!	#DIV/0!
0	0	0	0	0	0	0	0	0	0	0	0	0	0	#DIV/0!	#DIV/0!	#DIV/0!
0	0	0	0	0	0	0	0	0	0	0	0	0	0	#DIV/0!	#DIV/0!	#DIV/0!
0	0	0	0	0	0	0	0	0	0	0	0	0	0	#DIV/0!	#DIV/0!	#DIV/0!
0	0	0	0	0	0	0	0	0	0	0	0	0	0	#DIV/0!	#DIV/0!	#DIV/0!
0	0	0	0	0	0	0	0	0	0	0	0	0	0	#DIV/0!	#DIV/0!	#DIV/0!
0	0	0	0	0	0	0	0	0	0	0	0	0	0	#DIV/0!	#DIV/0!	#DIV/0!
0	0	0	0	0	0	0	0	0	0	0	0	0	0	#DIV/0!	#DIV/0!	#DIV/0!
0	0	0	0	0	0	0	0	0	0	0	0	0	0	#DIV/0!	#DIV/0!	#DIV/0!
0	0	0	0	0	0	0	0	0	0	0	0	0	0	#DIV/0!	#DIV/0!	#DIV/0!
0	0	0	0	0	0	0	0	0	0	0	0	0	0	#DIV/0!	#DIV/0!	#DIV/0!
0	0	0	0	0	0	0	0	0	0	0	0	0	0	#DIV/0!	#DIV/0!	#DIV/0!
0	0	0	0	0	0	0	0	0	0	0	0	0	0	#DIV/0!	#DIV/0!	#DIV/0!
0	0	0	0	0	0	0	0	0	0	0	0	0	0	#DIV/0!	#DIV/0!	#DIV/0!
0	0	0	0	0	0	0	0	0	0	0	0	0	0	#DIV/0!	#DIV/0!	#DIV/0!
0	0	0	0	0	0	0	0	0	0	0	0	0	0	#DIV/0!	#DIV/0!	#DIV/0!
0	0	0	0	0	0	0	0	0	0	0	0	0	0	#DIV/0!	#DIV/0!	#DIV/0!
0	0	0	0	0	0	0	0	0	0	0	0	0	0	#DIV/0!	#DIV/0!	#DIV/0!
0	0	0	0	0	0	0	0	0	0	0	0	0	0	#DIV/0!	#DIV/0!	#DIV/0!
0	0	0	0	0	0	0	0	0	0	0	0	0	0	#DIV/0!	#DIV/0!	#DIV/0!
0	0	0	0	0	0	0	0	0	0	0	0	0	0	#DIV/0!	#DIV/0!	#DIV/0!
0	0	0	0	0	0	0	0	0	0	0	0	0	0	#DIV/0!	#DIV/0!	#DIV/0!
0	0	0	0	0	0	0	0	0	0	0	0	0	0	#DIV/0!	#DIV/0!	#DIV/0!
0	0	0	0	0	0	0	0	0	0	0	0	0	0	#DIV/0!	#DIV/0!	#DIV/0!
0	0	0	0	0	0	0	0	0	0	0	0	0	0	#DIV/0!	#DIV/0!	#DIV/0!
0	0	0	0	0	0	0	0	0	0	0	0	0	0	#DIV/0!	#DIV/0!	#DIV/0!
0	0	0	0	0	0	0	0	0	0	0	0	0	0	#DIV/0!	#DIV/0!	#DIV/0!
0	0	0	0	0	0	0	0	0	0	0	0	0	0	#DIV/0!	#DIV/0!	#DIV/0!
0	0	0	0	0	0	0	0	0	0	0	0	0	0	#DIV/0!	#DIV/0!	#DIV/0!
0	0	0	0	0	0	0	0	0	0	0	0	0	0	#DIV/0!	#DIV/0!	#DIV/0!
0	0	0	0	0	0	0	0	0	0	0	0	0	0	#DIV/0!	#DIV/0!	#DIV/0!
0	0	0	0	0	0	0	0	0	0	0	0	0	0	#DIV/0!	#DIV/0!	#DIV/0!
0	0	0	0	0	0	0	0	0	0	0	0	0	0	#DIV/0!	#DIV/0!	#DIV/0!
0	0	0	0	0	0	0	0	0	0	0	0	0	0	#DIV/0!	#DIV/0!	#DIV/0!
0	0	0	0	0	0	0	0	0	0	0	0	0	0	#DIV/0!	#DIV/0!	#DIV/0!
0	0	0	0	0	0	0	0	0	0	0	0	0	0	#DIV/0!	#DIV/0!	#DIV/0!

## Sheet: S3. U-Pb Chil3
Sample Name: Chilhowee Group		625003	3743974					207/235		206/238		207/206		Best age
Grain #	[U] ppm	U/Th	207/235	2σ error	206/238	2σ error	RHO	Age Ma	2σ error	Age (Ma)	2σ error	Age (Ma)	2σ error	(Ma)	2σ error	% Discordance*	Th/U
Chil3-2.25	377	-6600	1.895	0.078	0.186	0.003	0	1064	21	1102	16	961	68	1102	16	3.57143	-0.000151515
Chil3c.11	1262	29.8	2.56	0.15	0.2085	0.0078	0	1266	43	1217	42	1340	61	1340	61	9.1791	0.033557
Chil3-2.33	272	23.1	2.019	0.059	0.1921	0.0043	0	1118	19	1131	23	1085	46	1131	23	1.16279	0.04329
Chil3b.03	219	17.7	1.926	0.058	0.1752	0.0046	0	1085	20	1043	26	1153	55	1043	26	3.87097	0.0564972
Chil3b.01	384	13.16	2.854	0.066	0.2328	0.0054	0	1365	17	1347	28	1368	32	1368	32	1.53509	0.0759878
Chil3-2.02	600	11.4	2.225	0.095	0.2143	0.0055	0	1215	24	1249	30	1153	36	1153	30	2.79835	0.0877193
Chil3b.06	270	6.92	3.21	0.1	0.255	0.0072	0	1451	25	1461	37	1417	48	1417	48	3.10515	0.144509
Chil3b.07	389	6.69	1.812	0.051	0.1716	0.0045	0	1049	19	1020	25	1072	48	1020	25	2.76454	0.149477
Chil3c.13	3372	6.02	1.011	0.014	0.0954	0.0015	0	708.6	6.9	587.4	8.8	1122	21	587.4	8.8	17.1041	0.166113
Chil3-2.07	163	4.7	2.566	0.072	0.2229	0.0052	0	1286	22	1299	27	1273	53	1273	53	2.04242	0.212766
Chil3c.5	390	3.46	2.291	0.045	0.2004	0.0031	0	1207	14	1177	17	1264	28	1177	17	2.4855	0.289017
Chil3c.10	842	3.122	3.11	0.11	0.2002	0.0072	0	1433	30	1173	39	1836	31	1173	39	18.1438	0.320307
Chil3c.7	281	3.11	2.825	0.065	0.2266	0.0031	0	1360	17	1316	16	1432	37	1432	37	8.10056	0.321543
Chil3-2.15	154	2.791	3.81	0.68	0.2327	0.0054	0	1415	68	1347	28	1490	160	1490	160	9.59732	0.358295
Chil3-2.31	118	2.77	2.523	0.087	0.2292	0.0053	0	1281	25	1328	28	1208	59	1208	59	9.93377	0.361011
Chil3-2.04	126.9	2.445	1.753	0.06	0.1556	0.0041	0	1026	23	931	23	1225	76	931	23	9.25926	0.408998
Chil3c.1	637	2.39	2.081	0.093	0.1888	0.0084	0	1134	31	1117	47	1162	56	1117	47	1.49912	0.41841
Chil3b.05	173	2.39	2.427	0.058	0.2097	0.0041	0	1251	17	1226	22	1247	41	1247	41	1.68404	0.41841
Chil3-2.21	109	2.367	2.52	0.23	0.2122	0.0086	0	1223	40	1235	44	1200	110	1200	110	0.981194	0.422476
Chil3b-1.01	137.5	2.32	4.36	0.17	0.2918	0.0049	0	1697	31	1649	24	1719	60	1719	60	4.07213	0.431034
Chil3b.02	348	2.1	2.17	0.16	0.185	0.014	0	1141	49	1083	76	1260	88	1083	76	5.08326	0.47619
Chil3c.6	230	2.053	2.929	0.082	0.2436	0.0065	0	1383	21	1403	34	1366	36	1366	36	2.70864	0.487092
Chil3c.4	158.6	2.02	2.411	0.05	0.2017	0.0024	0	1243	15	1184	13	1345	37	1184	13	4.74658	0.49505
Chil3-2.12	1730	1.947	2.165	0.085	0.1666	0.007	0	1164	27	989	39	1537	30	989	39	15.0344	0.513611
Chil3b.10	218.3	1.935	2.681	0.09	0.2177	0.0056	0	1316	24	1268	30	1363	58	1363	58	6.96992	0.516796
Chil3-2.06	14.9	1.88	2.79	0.32	0.2195	0.0085	0	1264	70	1274	45	1200	190	1200	190	0.791139	0.531915
Chil3b-1.07	147	1.764	2.96	0.11	0.2346	0.004	0	1380	25	1357	21	1406	58	1406	58	3.48506	0.566893
Chil3c.3	145.4	1.613	2.72	0.067	0.22	0.0036	0	1329	18	1281	19	1394	36	1394	36	8.10617	0.619963
Chil3-2.01	84.1	1.541	2.85	0.14	0.2189	0.0055	0	1377	42	1274	29	1460	100	1460	100	12.7397	0.648929
Chil3c.2	485	1.454	3.827	0.054	0.2757	0.0039	0	1599	11	1569	20	1641	24	1641	24	4.38757	0.687758
Chil3b.08	92.8	1.326	3.39	0.28	0.2523	0.0075	0	1474	43	1448	38	1450	120	1450	120	0.137931	0.754148
Chil3-2.27	133	1.191	3.06	0.19	0.1914	0.006	0	1403	41	1126	33	1810	100	1126	33	19.7434	0.839631
Chil3-2.03	143	0.936	4.21	0.22	0.2789	0.0066	0	1650	37	1583	33	1741	80	1741	80	9.07524	1.06838
Chil3-2.30	4.72	1.9	135	20	1.28	0.16	0	4660	170	4870	420	4710	180	4710	180	3.39703	0.526316
Chil3-2.28	5.22	1.607	92	6	0.87	0.048	0	4561	60	4000	180	4788	82	4788	82	16.4578	0.622278
Chil3b-1.15	2.72	0.778	115	12	1.1	0.11	0	4679	94	4550	290	4810	150	4810	150	5.40541	1.28535
Chil3b-1.16	1.2	0.211	140	32	1.38	0.3	0	4990	200	5520	810	4820	440	4820	440	14.5228	4.73934
Chil3-2.29	2.92	0.653	117.2	6.9	1.112	0.067	0	4813	56	4790	200	4832	61	4832	61	0.869205	1.53139
Chil3b-1.12	2.86	0.507	145	12	1.48	0.15	0	4957	92	5530	360	4850	150	4850	150	14.0206	1.97239
Chil3-2.26	7.06	0.484	124.8	5.2	1.168	0.048	0	4888	44	4960	140	4914	55	4914	55	0.936101	2.06612
Chil3-2.05	2.01	0.622	525	74	4.87	0.68	0	6010	170	10220	770	4905	52	DISC	DISC	108.359	1.60772
Chil3-2.08	4.71	0.8	88.3	8.3	0.816	0.05	0	4465	78	3790	170	4901	95	DISC	DISC	22.6688	1.25
Chil3-2.09	20.2	0.375	69.1	6.2	0.659	0.057	0	4183	92	3170	220	4848	40	DISC	DISC	34.6122	2.66667
Chil3-2.11	8.7	0.34	55.8	2	0.509	0.023	0	4089	34	2641	95	4972	75	DISC	DISC	46.8825	2.94118
Chil3-2.14	0.85	0.315	670	170	6.6	1.8	0	6500	250	12400	1500	4690	210	DISC	DISC	164.392	3.1746
Chil3-2.17	0.82	0.377	1970	380	17.1	3.2	0	7570	160	17990	920	4970	48	DISC	DISC	261.972	2.65252
Chil3-2.18	10.02	0.36	5410	230	49.7	2.2	0	8727	42	25210	290	4946	23	DISC	DISC	409.705	2.77778
Chil3-2.19	1342	4.07	1.232	0.037	0.0951	0.003	0	814	18	585	18	1458	33	DISC	DISC	28.1327	0.2457
Chil3-2.24	3.97	0.283	20.8	5.6	0.304	0.053	0	2760	130	1610	180	4310	600	DISC	DISC	62.645	3.53357
Chil3-2.32	7.51	0.608	43.5	3	0.461	0.032	0	3815	84	2390	140	4670	160	DISC	DISC	48.8223	1.64474
Chil3-2.34	3.4	0.759	386	17	3.49	0.18	0	6033	48	9630	230	4938	45	DISC	DISC	95.0182	1.31752
Chil3b-1.05	0.59	0.59	750	250	7	2.6	0	6430	380	12100	1900	4670	620	DISC	DISC	159.101	1.69492
Chil3b-1.06	50.2	0.314	24.27	0.6	0.481	0.012	0	3273	24	2524	51	3769	29	DISC	DISC	33.0326	3.18471
Chil3b-1.08	6.67	0.2017	1110	130	9.6	1.1	0	6810	160	13860	800	5029	40	DISC	DISC	175.602	4.95786
Chil3b-1.09	1270	1.066	1.449	0.091	0.1105	0.0067	0	892	42	671	39	1544	28	DISC	DISC	24.7758	0.938086
Chil3b-1.11	0.188	0.62	690	910	3.08	0.99	0	6300	1600	9000	1600	6400	3600	DISC	DISC	40.625	1.6129
Chil3b-1.14	483	2.23	7.36	0.35	0.311	0.014	0	2122	45	1732	69	2522	23	DISC	DISC	31.3243	0.44843
Chil3b-1.17	16.5	1.44	9.69	0.53	0.39	0.014	0	2390	53	2115	64	2645	63	DISC	DISC	20.0378	0.694444
Chil3-2.10	0.23	0	0	0	0	0	0	0	0	0	0	0	0	#DIV/0!	#DIV/0!	#DIV/0!	#DIV/0!
Chil3-2.13	0.0242	0	0	0	0	0	0	0	0	0	0	0	0	#DIV/0!	#DIV/0!	#DIV/0!	#DIV/0!
Chil3-2.16	-0.672	0	0	0	0	0	0	0	0	0	0	0	0	#DIV/0!	#DIV/0!	#DIV/0!	#DIV/0!
Chil3-2.20	0.24	0	0	0	0	0	0	0	0	0	0	0	0	#DIV/0!	#DIV/0!	#DIV/0!	#DIV/0!
Chil3-2.22	-0.93	0	0	0	0	0	0	0	0	0	0	0	0	#DIV/0!	#DIV/0!	#DIV/0!	#DIV/0!
Chil3-2.23	-1.798	0	0	0	0	0	0	0	0	0	0	0	0	#DIV/0!	#DIV/0!	#DIV/0!	#DIV/0!
Chil3-2.35	-0.007	0	0	0	0	0	0	0	0	0	0	0	0	#DIV/0!	#DIV/0!	#DIV/0!	#DIV/0!
Chil3b-1.03	0.5	0	0	0	0	0	0	0	0	0	0	0	0	#DIV/0!	#DIV/0!	#DIV/0!	#DIV/0!
Chil3b-1.13	0.145	0	0	0	0	0	0	0	0	0	0	0	0	#DIV/0!	#DIV/0!	#DIV/0!	#DIV/0!
0	0	0	0	0	0	0	0	0	0	0	0	0	0	#DIV/0!	#DIV/0!	#DIV/0!	Core
0	0	0	0	0	0	0	0	0	0	0	0	0	0	#DIV/0!	#DIV/0!	#DIV/0!	Core
0	0	0	0	0	0	0	0	0	0	0	0	0	0	#DIV/0!	#DIV/0!	#DIV/0!	Core
0	0	0	0	0	0	0	0	0	0	0	0	0	0	#DIV/0!	#DIV/0!	#DIV/0!	Core
0	0	0	0	0	0	0	0	0	0	0	0	0	0	#DIV/0!	#DIV/0!	#DIV/0!	Core
0	0	0	0	0	0	0	0	0	0	0	0	0	0	#DIV/0!	#DIV/0!	#DIV/0!	Core
0	0	0	0	0	0	0	0	0	0	0	0	0	0	#DIV/0!	#DIV/0!	#DIV/0!	Core
0	0	0	0	0	0	0	0	0	0	0	0	0	0	#DIV/0!	#DIV/0!	#DIV/0!	Core
0	0	0	0	0	0	0	0	0	0	0	0	0	0	#DIV/0!	#DIV/0!	#DIV/0!	Core
0	0	0	0	0	0	0	0	0	0	0	0	0	0	#DIV/0!	#DIV/0!	#DIV/0!	Core
0	0	0	0	0	0	0	0	0	0	0	0	0	0	#DIV/0!	#DIV/0!	#DIV/0!	Core
0	0	0	0	0	0	0	0	0	0	0	0	0	0	#DIV/0!	#DIV/0!	#DIV/0!	Core
0	0	0	0	0	0	0	0	0	0	0	0	0	0	#DIV/0!	#DIV/0!	#DIV/0!	Core
0	0	0	0	0	0	0	0	0	0	0	0	0	0	#DIV/0!	#DIV/0!	#DIV/0!	Core
0	0	0	0	0	0	0	0	0	0	0	0	0	0	#DIV/0!	#DIV/0!	#DIV/0!	Core
0	0	0	0	0	0	0	0	0	0	0	0	0	0	#DIV/0!	#DIV/0!	#DIV/0!	Core
0	0	0	0	0	0	0	0	0	0	0	0	0	0	#DIV/0!	#DIV/0!	#DIV/0!	Core
0	0	0	0	0	0	0	0	0	0	0	0	0	0	#DIV/0!	#DIV/0!	#DIV/0!	Core
0	0	0	0	0	0	0	0	0	0	0	0	0	0	#DIV/0!	#DIV/0!	#DIV/0!	Core
0	0	0	0	0	0	0	0	0	0	0	0	0	0	#DIV/0!	#DIV/0!	#DIV/0!	Core
0	0	0	0	0	0	0	0	0	0	0	0	0	0	#DIV/0!	#DIV/0!	#DIV/0!	Core
0	0	0	0	0	0	0	0	0	0	0	0	0	0	#DIV/0!	#DIV/0!	#DIV/0!	Core
0	0	0	0	0	0	0	0	0	0	0	0	0	0	#DIV/0!	#DIV/0!	#DIV/0!	Core
0	0	0	0	0	0	0	0	0	0	0	0	0	0	#DIV/0!	#DIV/0!	#DIV/0!	Core
0	0	0	0	0	0	0	0	0	0	0	0	0	0	#DIV/0!	#DIV/0!	#DIV/0!	Core
0	0	0	0	0	0	0	0	0	0	0	0	0	0	#DIV/0!	#DIV/0!	#DIV/0!	Core
0	0	0	0	0	0	0	0	0	0	0	0	0	0	#DIV/0!	#DIV/0!	#DIV/0!	Core
0	0	0	0	0	0	0	0	0	0	0	0	0	0	#DIV/0!	#DIV/0!	#DIV/0!	Core
0	0	0	0	0	0	0	0	0	0	0	0	0	0	#DIV/0!	#DIV/0!	#DIV/0!	Core
0	0	0	0	0	0	0	0	0	0	0	0	0	0	#DIV/0!	#DIV/0!	#DIV/0!	Core
0	0	0	0	0	0	0	0	0	0	0	0	0	0	#DIV/0!	#DIV/0!	#DIV/0!	Core
0	0	0	0	0	0	0	0	0	0	0	0	0	0	#DIV/0!	#DIV/0!	#DIV/0!	Core
0	0	0	0	0	0	0	0	0	0	0	0	0	0	#DIV/0!	#DIV/0!	#DIV/0!	Core
0	0	0	0	0	0	0	0	0	0	0	0	0	0	#DIV/0!	#DIV/0!	#DIV/0!	Core
0	0	0	0	0	0	0	0	0	0	0	0	0	0	#DIV/0!	#DIV/0!	#DIV/0!	Core
0	0	0	0	0	0	0	0	0	0	0	0	0	0	#DIV/0!	#DIV/0!	#DIV/0!	Core
0	0	0	0	0	0	0	0	0	0	0	0	0	0	#DIV/0!	#DIV/0!	#DIV/0!	Core
0	0	0	0	0	0	0	0	0	0	0	0	0	0	#DIV/0!	#DIV/0!	#DIV/0!	Core
0	0	0	0	0	0	0	0	0	0	0	0	0	0	#DIV/0!	#DIV/0!	#DIV/0!	Core
0	0	0	0	0	0	0	0	0	0	0	0	0	0	#DIV/0!	#DIV/0!	#DIV/0!	Core
0	0	0	0	0	0	0	0	0	0	0	0	0	0	#DIV/0!	#DIV/0!	#DIV/0!	Core
0	0	0	0	0	0	0	0	0	0	0	0	0	0	#DIV/0!	#DIV/0!	#DIV/0!	Core
0	0	0	0	0	0	0	0	0	0	0	0	0	0	#DIV/0!	#DIV/0!	#DIV/0!	Core
0	0	0	0	0	0	0	0	0	0	0	0	0	0	#DIV/0!	#DIV/0!	#DIV/0!	Core
0	0	0	0	0	0	0	0	0	0	0	0	0	0	#DIV/0!	#DIV/0!	#DIV/0!	Core
0	0	0	0	0	0	0	0	0	0	0	0	0	0	#DIV/0!	#DIV/0!	#DIV/0!	Core
0	0	0	0	0	0	0	0	0	0	0	0	0	0	#DIV/0!	#DIV/0!	#DIV/0!	Core
0	0	0	0	0	0	0	0	0	0	0	0	0	0	#DIV/0!	#DIV/0!	#DIV/0!	Core
0	0	0	0	0	0	0	0	0	0	0	0	0	0	#DIV/0!	#DIV/0!	#DIV/0!	Core
0	0	0	0	0	0	0	0	0	0	0	0	0	0	#DIV/0!	#DIV/0!	#DIV/0!	Core
0	0	0	0	0	0	0	0	0	0	0	0	0	0	#DIV/0!	#DIV/0!	#DIV/0!	Core
0	0	0	0	0	0	0	0	0	0	0	0	0	0	#DIV/0!	#DIV/0!	#DIV/0!	Core
0	0	0	0	0	0	0	0	0	0	0	0	0	0	#DIV/0!	#DIV/0!	#DIV/0!	Core
0	0	0	0	0	0	0	0	0	0	0	0	0	0	#DIV/0!	#DIV/0!	#DIV/0!	Core
0	0	0	0	0	0	0	0	0	0	0	0	0	0	#DIV/0!	#DIV/0!	#DIV/0!	Core
0	0	0	0	0	0	0	0	0	0	0	0	0	0	#DIV/0!	#DIV/0!	#DIV/0!	Core
0	0	0	0	0	0	0	0	0	0	0	0	0	0	#DIV/0!	#DIV/0!	#DIV/0!	Core
0	0	0	0	0	0	0	0	0	0	0	0	0	0	#DIV/0!	#DIV/0!	#DIV/0!	Core
0	0	0	0	0	0	0	0	0	0	0	0	0	0	#DIV/0!	#DIV/0!	#DIV/0!	Core
0	0	0	0	0	0	0	0	0	0	0	0	0	0	#DIV/0!	#DIV/0!	#DIV/0!	Core
0	0	0	0	0	0	0	0	0	0	0	0	0	0	#DIV/0!	#DIV/0!	#DIV/0!	Core
0	0	0	0	0	0	0	0	0	0	0	0	0	0	#DIV/0!	#DIV/0!	#DIV/0!	Core
0	0	0	0	0	0	0	0	0	0	0	0	0	0	#DIV/0!	#DIV/0!	#DIV/0!	Core
0	0	0	0	0	0	0	0	0	0	0	0	0	0	#DIV/0!	#DIV/0!	#DIV/0!	Core
0	0	0	0	0	0	0	0	0	0	0	0	0	0	#DIV/0!	#DIV/0!	#DIV/0!	Core
0	0	0	0	0	0	0	0	0	0	0	0	0	0	#DIV/0!	#DIV/0!	#DIV/0!	Core
0	0	0	0	0	0	0	0	0	0	0	0	0	0	#DIV/0!	#DIV/0!	#DIV/0!	Core
0	0	0	0	0	0	0	0	0	0	0	0	0	0	#DIV/0!	#DIV/0!	#DIV/0!	Core
0	0	0	0	0	0	0	0	0	0	0	0	0	0	#DIV/0!	#DIV/0!	#DIV/0!	Core
0	0	0	0	0	0	0	0	0	0	0	0	0	0	#DIV/0!	#DIV/0!	#DIV/0!	Core
0	0	0	0	0	0	0	0	0	0	0	0	0	0	#DIV/0!	#DIV/0!	#DIV/0!	Core
0	0	0	0	0	0	0	0	0	0	0	0	0	0	#DIV/0!	#DIV/0!	#DIV/0!	Core
0	0	0	0	0	0	0	0	0	0	0	0	0	0	#DIV/0!	#DIV/0!	#DIV/0!	Core
0	0	0	0	0	0	0	0	0	0	0	0	0	0	#DIV/0!	#DIV/0!	#DIV/0!	Core
0	0	0	0	0	0	0	0	0	0	0	0	0	0	#DIV/0!	#DIV/0!	#DIV/0!	Core
0	0	0	0	0	0	0	0	0	0	0	0	0	0	#DIV/0!	#DIV/0!	#DIV/0!	Core
0	0	0	0	0	0	0	0	0	0	0	0	0	0	#DIV/0!	#DIV/0!	#DIV/0!	Core
0	0	0	0	0	0	0	0	0	0	0	0	0	0	#DIV/0!	#DIV/0!	#DIV/0!	Core
0	0	0	0	0	0	0	0	0	0	0	0	0	0	#DIV/0!	#DIV/0!	#DIV/0!	Core
0	0	0	0	0	0	0	0	0	0	0	0	0	0	#DIV/0!	#DIV/0!	#DIV/0!	Core
0	0	0	0	0	0	0	0	0	0	0	0	0	0	#DIV/0!	#DIV/0!	#DIV/0!	Core
0	0	0	0	0	0	0	0	0	0	0	0	0	0	#DIV/0!	#DIV/0!	#DIV/0!	Core
0	0	0	0	0	0	0	0	0	0	0	0	0	0	#DIV/0!	#DIV/0!	#DIV/0!	Core
0	0	0	0	0	0	0	0	0	0	0	0	0	0	#DIV/0!	#DIV/0!	#DIV/0!	Core
0	0	0	0	0	0	0	0	0	0	0	0	0	0	#DIV/0!	#DIV/0!	#DIV/0!	Core
0	0	0	0	0	0	0	0	0	0	0	0	0	0	#DIV/0!	#DIV/0!	#DIV/0!	Core
0	0	0	0	0	0	0	0	0	0	0	0	0	0	#DIV/0!	#DIV/0!	#DIV/0!	Core
0	0	0	0	0	0	0	0	0	0	0	0	0	0	#DIV/0!	#DIV/0!	#DIV/0!	Core
0	0	0	0	0	0	0	0	0	0	0	0	0	0	#DIV/0!	#DIV/0!	#DIV/0!	Core
0	0	0	0	0	0	0	0	0	0	0	0	0	0	#DIV/0!	#DIV/0!	#DIV/0!	Core
0	0	0	0	0	0	0	0	0	0	0	0	0	0	#DIV/0!	#DIV/0!	#DIV/0!	Core
0	0	0	0	0	0	0	0	0	0	0	0	0	0	#DIV/0!	#DIV/0!	#DIV/0!	Core
0	0	0	0	0	0	0	0	0	0	0	0	0	0	#DIV/0!	#DIV/0!	#DIV/0!	Core
0	0	0	0	0	0	0	0	0	0	0	0	0	0	#DIV/0!	#DIV/0!	#DIV/0!	Core
0	0	0	0	0	0	0	0	0	0	0	0	0	0	#DIV/0!	#DIV/0!	#DIV/0!	Core
0	0	0	0	0	0	0	0	0	0	0	0	0	0	#DIV/0!	#DIV/0!	#DIV/0!	Core
0	0	0	0	0	0	0	0	0	0	0	0	0	0	#DIV/0!	#DIV/0!	#DIV/0!	Core
0	0	0	0	0	0	0	0	0	0	0	0	0	0	#DIV/0!	#DIV/0!	#DIV/0!	Core
0	0	0	0	0	0	0	0	0	0	0	0	0	0	#DIV/0!	#DIV/0!	#DIV/0!	Core
0	0	0	0	0	0	0	0	0	0	0	0	0	0	#DIV/0!	#DIV/0!	#DIV/0!	Core
0	0	0	0	0	0	0	0	0	0	0	0	0	0	#DIV/0!	#DIV/0!	#DIV/0!	Core
0	0	0	0	0	0	0	0	0	0	0	0	0	0	#DIV/0!	#DIV/0!	#DIV/0!	Core
0	0	0	0	0	0	0	0	0	0	0	0	0	0	#DIV/0!	#DIV/0!	#DIV/0!	Core
0	0	0	0	0	0	0	0	0	0	0	0	0	0	#DIV/0!	#DIV/0!	#DIV/0!	Core
0	0	0	0	0	0	0	0	0	0	0	0	0	0	#DIV/0!	#DIV/0!	#DIV/0!	Core
0	0	0	0	0	0	0	0	0	0	0	0	0	0	#DIV/0!	#DIV/0!	#DIV/0!	Core
0	0	0	0	0	0	0	0	0	0	0	0	0	0	#DIV/0!	#DIV/0!	#DIV/0!	Core
0	0	0	0	0	0	0	0	0	0	0	0	0	0	#DIV/0!	#DIV/0!	#DIV/0!	Core
0	0	0	0	0	0	0	0	0	0	0	0	0	0	#DIV/0!	#DIV/0!	#DIV/0!	Core
0	0	0	0	0	0	0	0	0	0	0	0	0	0	#DIV/0!	#DIV/0!	#DIV/0!	Core
0	0	0	0	0	0	0	0	0	0	0	0	0	0	#DIV/0!	#DIV/0!	#DIV/0!	Core
0	0	0	0	0	0	0	0	0	0	0	0	0	0	#DIV/0!	#DIV/0!	#DIV/0!	Core
0	0	0	0	0	0	0	0	0	0	0	0	0	0	#DIV/0!	#DIV/0!	#DIV/0!	Core
0	0	0	0	0	0	0	0	0	0	0	0	0	0	#DIV/0!	#DIV/0!	#DIV/0!	Core
0	0	0	0	0	0	0	0	0	0	0	0	0	0	#DIV/0!	#DIV/0!	#DIV/0!	Core
0	0	0	0	0	0	0	0	0	0	0	0	0	0	#DIV/0!	#DIV/0!	#DIV/0!	Core
0	0	0	0	0	0	0	0	0	0	0	0	0	0	#DIV/0!	#DIV/0!	#DIV/0!	Core
0	0	0	0	0	0	0	0	0	0	0	0	0	0	#DIV/0!	#DIV/0!	#DIV/0!	Core
0	0	0	0	0	0	0	0	0	0	0	0	0	0	#DIV/0!	#DIV/0!	#DIV/0!	Core
0	0	0	0	0	0	0	0	0	0	0	0	0	0	#DIV/0!	#DIV/0!	#DIV/0!	Core
0	0	0	0	0	0	0	0	0	0	0	0	0	0	#DIV/0!	#DIV/0!	#DIV/0!	Core
0	0	0	0	0	0	0	0	0	0	0	0	0	0	#DIV/0!	#DIV/0!	#DIV/0!	Core
0	0	0	0	0	0	0	0	0	0	0	0	0	0	#DIV/0!	#DIV/0!	#DIV/0!	Core
0	0	0	0	0	0	0	0	0	0	0	0	0	0	#DIV/0!	#DIV/0!	#DIV/0!	Core
0	0	0	0	0	0	0	0	0	0	0	0	0	0	#DIV/0!	#DIV/0!	#DIV/0!	Core
0	0	0	0	0	0	0	0	0	0	0	0	0	0	#DIV/0!	#DIV/0!	#DIV/0!	Core
0	0	0	0	0	0	0	0	0	0	0	0	0	0	#DIV/0!	#DIV/0!	#DIV/0!	Core
0	0	0	0	0	0	0	0	0	0	0	0	0	0	#DIV/0!	#DIV/0!	#DIV/0!	Core
0	0	0	0	0	0	0	0	0	0	0	0	0	0	#DIV/0!	#DIV/0!	#DIV/0!	Core
0	0	0	0	0	0	0	0	0	0	0	0	0	0	#DIV/0!	#DIV/0!	#DIV/0!	Core
0	0	0	0	0	0	0	0	0	0	0	0	0	0	#DIV/0!	#DIV/0!	#DIV/0!	Core
0	0	0	0	0	0	0	0	0	0	0	0	0	0	#DIV/0!	#DIV/0!	#DIV/0!	Core
0	0	0	0	0	0	0	0	0	0	0	0	0	0	#DIV/0!	#DIV/0!	#DIV/0!	Core
0	0	0	0	0	0	0	0	0	0	0	0	0	0	#DIV/0!	#DIV/0!	#DIV/0!	Core
0	0	0	0	0	0	0	0	0	0	0	0	0	0	#DIV/0!	#DIV/0!	#DIV/0!	Core
0	0	0	0	0	0	0	0	0	0	0	0	0	0	#DIV/0!	#DIV/0!	#DIV/0!	Core
0	0	0	0	0	0	0	0	0	0	0	0	0	0	#DIV/0!	#DIV/0!	#DIV/0!	Core
0	0	0	0	0	0	0	0	0	0	0	0	0	0	#DIV/0!	#DIV/0!	#DIV/0!	Core
0	0	0	0	0	0	0	0	0	0	0	0	0	0	#DIV/0!	#DIV/0!	#DIV/0!	Core
0	0	0	0	0	0	0	0	0	0	0	0	0	0	#DIV/0!	#DIV/0!	#DIV/0!	Core
0	0	0	0	0	0	0	0	0	0	0	0	0	0	#DIV/0!	#DIV/0!	#DIV/0!	Core
0	0	0	0	0	0	0	0	0	0	0	0	0	0	#DIV/0!	#DIV/0!	#DIV/0!	Core
0	0	0	0	0	0	0	0	0	0	0	0	0	0	#DIV/0!	#DIV/0!	#DIV/0!	Core
0	0	0	0	0	0	0	0	0	0	0	0	0	0	#DIV/0!	#DIV/0!	#DIV/0!	Core
0	0	0	0	0	0	0	0	0	0	0	0	0	0	#DIV/0!	#DIV/0!	#DIV/0!	Core
0	0	0	0	0	0	0	0	0	0	0	0	0	0	#DIV/0!	#DIV/0!	#DIV/0!	Core
0	0	0	0	0	0	0	0	0	0	0	0	0	0	#DIV/0!	#DIV/0!	#DIV/0!	Core
0	0	0	0	0	0	0	0	0	0	0	0	0	0	#DIV/0!	#DIV/0!	#DIV/0!	Core
0	0	0	0	0	0	0	0	0	0	0	0	0	0	#DIV/0!	#DIV/0!	#DIV/0!	Core
0	0	0	0	0	0	0	0	0	0	0	0	0	0	#DIV/0!	#DIV/0!	#DIV/0!	Core
0	0	0	0	0	0	0	0	0	0	0	0	0	0	#DIV/0!	#DIV/0!	#DIV/0!	Core
0	0	0	0	0	0	0	0	0	0	0	0	0	0	#DIV/0!	#DIV/0!	#DIV/0!	Core
0	0	0	0	0	0	0	0	0	0	0	0	0	0	#DIV/0!	#DIV/0!	#DIV/0!	Core
0	0	0	0	0	0	0	0	0	0	0	0	0	0	#DIV/0!	#DIV/0!	#DIV/0!	Core
0	0	0	0	0	0	0	0	0	0	0	0	0	0	#DIV/0!	#DIV/0!	#DIV/0!	Core
0	0	0	0	0	0	0	0	0	0	0	0	0	0	#DIV/0!	#DIV/0!	#DIV/0!	Core
0	0	0	0	0	0	0	0	0	0	0	0	0	0	#DIV/0!	#DIV/0!	#DIV/0!	Core
0	0	0	0	0	0	0	0	0	0	0	0	0	0	#DIV/0!	#DIV/0!	#DIV/0!	Core
0	0	0	0	0	0	0	0	0	0	0	0	0	0	#DIV/0!	#DIV/0!	#DIV/0!	Core
0	0	0	0	0	0	0	0	0	0	0	0	0	0	#DIV/0!	#DIV/0!	#DIV/0!	Core
0	0	0	0	0	0	0	0	0	0	0	0	0	0	#DIV/0!	#DIV/0!	#DIV/0!	Core
0	0	0	0	0	0	0	0	0	0	0	0	0	0	#DIV/0!	#DIV/0!	#DIV/0!	Core
0	0	0	0	0	0	0	0	0	0	0	0	0	0	#DIV/0!	#DIV/0!	#DIV/0!	Core
0	0	0	0	0	0	0	0	0	0	0	0	0	0	#DIV/0!	#DIV/0!	#DIV/0!	Core
0	0	0	0	0	0	0	0	0	0	0	0	0	0	#DIV/0!	#DIV/0!	#DIV/0!	Core
0	0	0	0	0	0	0	0	0	0	0	0	0	0	#DIV/0!	#DIV/0!	#DIV/0!	Core
0	0	0	0	0	0	0	0	0	0	0	0	0	0	#DIV/0!	#DIV/0!	#DIV/0!	Core
0	0	0	0	0	0	0	0	0	0	0	0	0	0	#DIV/0!	#DIV/0!	#DIV/0!	Core
0	0	0	0	0	0	0	0	0	0	0	0	0	0	#DIV/0!	#DIV/0!	#DIV/0!	Core
0	0	0	0	0	0	0	0	0	0	0	0	0	0	#DIV/0!	#DIV/0!	#DIV/0!	Core
0	0	0	0	0	0	0	0	0	0	0	0	0	0	#DIV/0!	#DIV/0!	#DIV/0!	Core
0	0	0	0	0	0	0	0	0	0	0	0	0	0	#DIV/0!	#DIV/0!	#DIV/0!	Core
0	0	0	0	0	0	0	0	0	0	0	0	0	0	#DIV/0!	#DIV/0!	#DIV/0!	Core
0	0	0	0	0	0	0	0	0	0	0	0	0	0	#DIV/0!	#DIV/0!	#DIV/0!	Core
0	0	0	0	0	0	0	0	0	0	0	0	0	0	#DIV/0!	#DIV/0!	#DIV/0!	Core
0	0	0	0	0	0	0	0	0	0	0	0	0	0	#DIV/0!	#DIV/0!	#DIV/0!	Core
0	0	0	0	0	0	0	0	0	0	0	0	0	0	#DIV/0!	#DIV/0!	#DIV/0!	Core
0	0	0	0	0	0	0	0	0	0	0	0	0	0	#DIV/0!	#DIV/0!	#DIV/0!	Core
0	0	0	0	0	0	0	0	0	0	0	0	0	0	#DIV/0!	#DIV/0!	#DIV/0!	Core
0	0	0	0	0	0	0	0	0	0	0	0	0	0	#DIV/0!	#DIV/0!	#DIV/0!	Core
0	0	0	0	0	0	0	0	0	0	0	0	0	0	#DIV/0!	#DIV/0!	#DIV/0!	Core
0	0	0	0	0	0	0	0	0	0	0	0	0	0	#DIV/0!	#DIV/0!	#DIV/0!	Core
0	0	0	0	0	0	0	0	0	0	0	0	0	0	#DIV/0!	#DIV/0!	#DIV/0!	Core
0	0	0	0	0	0	0	0	0	0	0	0	0	0	#DIV/0!	#DIV/0!	#DIV/0!	Core
0	0	0	0	0	0	0	0	0	0	0	0	0	0	#DIV/0!	#DIV/0!	#DIV/0!	Core
0	0	0	0	0	0	0	0	0	0	0	0	0	0	#DIV/0!	#DIV/0!	#DIV/0!	Core
0	0	0	0	0	0	0	0	0	0	0	0	0	0	#DIV/0!	#DIV/0!	#DIV/0!	Core
0	0	0	0	0	0	0	0	0	0	0	0	0	0	#DIV/0!	#DIV/0!	#DIV/0!	Core
0	0	0	0	0	0	0	0	0	0	0	0	0	0	#DIV/0!	#DIV/0!	#DIV/0!	Core
0	0	0	0	0	0	0	0	0	0	0	0	0	0	#DIV/0!	#DIV/0!	#DIV/0!	Core
0	0	0	0	0	0	0	0	0	0	0	0	0	0	#DIV/0!	#DIV/0!	#DIV/0!	Core
0	0	0	0	0	0	0	0	0	0	0	0	0	0	#DIV/0!	#DIV/0!	#DIV/0!	Core
0	0	0	0	0	0	0	0	0	0	0	0	0	0	#DIV/0!	#DIV/0!	#DIV/0!	Core
0	0	0	0	0	0	0	0	0	0	0	0	0	0	#DIV/0!	#DIV/0!	#DIV/0!	Core
0	0	0	0	0	0	0	0	0	0	0	0	0	0	#DIV/0!	#DIV/0!	#DIV/0!	Core
0	0	0	0	0	0	0	0	0	0	0	0	0	0	#DIV/0!	#DIV/0!	#DIV/0!	Core
0	0	0	0	0	0	0	0	0	0	0	0	0	0	#DIV/0!	#DIV/0!	#DIV/0!	Core
0	0	0	0	0	0	0	0	0	0	0	0	0	0	#DIV/0!	#DIV/0!	#DIV/0!	Core
0	0	0	0	0	0	0	0	0	0	0	0	0	0	#DIV/0!	#DIV/0!	#DIV/0!	Core
0	0	0	0	0	0	0	0	0	0	0	0	0	0	#DIV/0!	#DIV/0!	#DIV/0!	Core
0	0	0	0	0	0	0	0	0	0	0	0	0	0	#DIV/0!	#DIV/0!	#DIV/0!	Core
0	0	0	0	0	0	0	0	0	0	0	0	0	0	#DIV/0!	#DIV/0!	#DIV/0!	Core
0	0	0	0	0	0	0	0	0	0	0	0	0	0	#DIV/0!	#DIV/0!	#DIV/0!	Core
0	0	0	0	0	0	0	0	0	0	0	0	0	0	#DIV/0!	#DIV/0!	#DIV/0!	Core
0	0	0	0	0	0	0	0	0	0	0	0	0	0	#DIV/0!	#DIV/0!	#DIV/0!	Core
0	0	0	0	0	0	0	0	0	0	0	0	0	0	#DIV/0!	#DIV/0!	#DIV/0!	Core
0	0	0	0	0	0	0	0	0	0	0	0	0	0	#DIV/0!	#DIV/0!	#DIV/0!	Core
0	0	0	0	0	0	0	0	0	0	0	0	0	0	#DIV/0!	#DIV/0!	#DIV/0!	Core
0	0	0	0	0	0	0	0	0	0	0	0	0	0	#DIV/0!	#DIV/0!	#DIV/0!	Core
0	0	0	0	0	0	0	0	0	0	0	0	0	0	#DIV/0!	#DIV/0!	#DIV/0!	Core
0	0	0	0	0	0	0	0	0	0	0	0	0	0	#DIV/0!	#DIV/0!	#DIV/0!	Core
0	0	0	0	0	0	0	0	0	0	0	0	0	0	#DIV/0!	#DIV/0!	#DIV/0!	Core
0	0	0	0	0	0	0	0	0	0	0	0	0	0	#DIV/0!	#DIV/0!	#DIV/0!	Core
0	0	0	0	0	0	0	0	0	0	0	0	0	0	#DIV/0!	#DIV/0!	#DIV/0!	Core
0	0	0	0	0	0	0	0	0	0	0	0	0	0	#DIV/0!	#DIV/0!	#DIV/0!	Core
0	0	0	0	0	0	0	0	0	0	0	0	0	0	#DIV/0!	#DIV/0!	#DIV/0!	Core
0	0	0	0	0	0	0	0	0	0	0	0	0	0	#DIV/0!	#DIV/0!	#DIV/0!	Core
0	0	0	0	0	0	0	0	0	0	0	0	0	0	#DIV/0!	#DIV/0!	#DIV/0!	Core
0	0	0	0	0	0	0	0	0	0	0	0	0	0	#DIV/0!	#DIV/0!	#DIV/0!	Core
0	0	0	0	0	0	0	0	0	0	0	0	0	0	#DIV/0!	#DIV/0!	#DIV/0!	Core
0	0	0	0	0	0	0	0	0	0	0	0	0	0	#DIV/0!	#DIV/0!	#DIV/0!	Core
0	0	0	0	0	0	0	0	0	0	0	0	0	0	#DIV/0!	#DIV/0!	#DIV/0!	Core
0	0	0	0	0	0	0	0	0	0	0	0	0	0	#DIV/0!	#DIV/0!	#DIV/0!	Core
0	0	0	0	0	0	0	0	0	0	0	0	0	0	#DIV/0!	#DIV/0!	#DIV/0!	Core
0	0	0	0	0	0	0	0	0	0	0	0	0	0	#DIV/0!	#DIV/0!	#DIV/0!	Core
0	0	0	0	0	0	0	0	0	0	0	0	0	0	#DIV/0!	#DIV/0!	#DIV/0!	Core
0	0	0	0	0	0	0	0	0	0	0	0	0	0	#DIV/0!	#DIV/0!	#DIV/0!	Core
0	0	0	0	0	0	0	0	0	0	0	0	0	0	#DIV/0!	#DIV/0!	#DIV/0!	Core
0	0	0	0	0	0	0	0	0	0	0	0	0	0	#DIV/0!	#DIV/0!	#DIV/0!	Core
0	0	0	0	0	0	0	0	0	0	0	0	0	0	#DIV/0!	#DIV/0!	#DIV/0!	Core
0	0	0	0	0	0	0	0	0	0	0	0	0	0	#DIV/0!	#DIV/0!	#DIV/0!	Core
0	0	0	0	0	0	0	0	0	0	0	0	0	0	#DIV/0!	#DIV/0!	#DIV/0!	Core
0	0	0	0	0	0	0	0	0	0	0	0	0	0	#DIV/0!	#DIV/0!	#DIV/0!	Core
0	0	0	0	0	0	0	0	0	0	0	0	0	0	#DIV/0!	#DIV/0!	#DIV/0!	Core
0	0	0	0	0	0	0	0	0	0	0	0	0	0	#DIV/0!	#DIV/0!	#DIV/0!	Core
0	0	0	0	0	0	0	0	0	0	0	0	0	0	#DIV/0!	#DIV/0!	#DIV/0!	Core
0	0	0	0	0	0	0	0	0	0	0	0	0	0	#DIV/0!	#DIV/0!	#DIV/0!	Core
0	0	0	0	0	0	0	0	0	0	0	0	0	0	#DIV/0!	#DIV/0!	#DIV/0!	Core
0	0	0	0	0	0	0	0	0	0	0	0	0	0	#DIV/0!	#DIV/0!	#DIV/0!	Core
0	0	0	0	0	0	0	0	0	0	0	0	0	0	#DIV/0!	#DIV/0!	#DIV/0!	Core
0	0	0	0	0	0	0	0	0	0	0	0	0	0	#DIV/0!	#DIV/0!	#DIV/0!	Core
0	0	0	0	0	0	0	0	0	0	0	0	0	0	#DIV/0!	#DIV/0!	#DIV/0!	Core
0	0	0	0	0	0	0	0	0	0	0	0	0	0	#DIV/0!	#DIV/0!	#DIV/0!	Core
0	0	0	0	0	0	0	0	0	0	0	0	0	0	#DIV/0!	#DIV/0!	#DIV/0!	Core
0	0	0	0	0	0	0	0	0	0	0	0	0	0	#DIV/0!	#DIV/0!	#DIV/0!	Core
0	0	0	0	0	0	0	0	0	0	0	0	0	0	#DIV/0!	#DIV/0!	#DIV/0!	Core
0	0	0	0	0	0	0	0	0	0	0	0	0	0	#DIV/0!	#DIV/0!	#DIV/0!	Core
0	0	0	0	0	0	0	0	0	0	0	0	0	0	#DIV/0!	#DIV/0!	#DIV/0!	Core
0	0	0	0	0	0	0	0	0	0	0	0	0	0	#DIV/0!	#DIV/0!	#DIV/0!	Core
0	0	0	0	0	0	0	0	0	0	0	0	0	0	#DIV/0!	#DIV/0!	#DIV/0!	Core
0	0	0	0	0	0	0	0	0	0	0	0	0	0	#DIV/0!	#DIV/0!	#DIV/0!	Core
0	0	0	0	0	0	0	0	0	0	0	0	0	0	#DIV/0!	#DIV/0!	#DIV/0!	Core
0	0	0	0	0	0	0	0	0	0	0	0	0	0	#DIV/0!	#DIV/0!	#DIV/0!	Core
0	0	0	0	0	0	0	0	0	0	0	0	0	0	#DIV/0!	#DIV/0!	#DIV/0!	Core
0	0	0	0	0	0	0	0	0	0	0	0	0	0	#DIV/0!	#DIV/0!	#DIV/0!	Core
0	0	0	0	0	0	0	0	0	0	0	0	0	0	#DIV/0!	#DIV/0!	#DIV/0!	Core
0	0	0	0	0	0	0	0	0	0	0	0	0	0	#DIV/0!	#DIV/0!	#DIV/0!	Core
0	0	0	0	0	0	0	0	0	0	0	0	0	0	#DIV/0!	#DIV/0!	#DIV/0!	Core
0	0	0	0	0	0	0	0	0	0	0	0	0	0	#DIV/0!	#DIV/0!	#DIV/0!	Core
0	0	0	0	0	0	0	0	0	0	0	0	0	0	#DIV/0!	#DIV/0!	#DIV/0!	Core
0	0	0	0	0	0	0	0	0	0	0	0	0	0	#DIV/0!	#DIV/0!	#DIV/0!	Core
0	0	0	0	0	0	0	0	0	0	0	0	0	0	#DIV/0!	#DIV/0!	#DIV/0!	Core
0	0	0	0	0	0	0	0	0	0	0	0	0	0	#DIV/0!	#DIV/0!	#DIV/0!	Core
0	0	0	0	0	0	0	0	0	0	0	0	0	0	#DIV/0!	#DIV/0!	#DIV/0!	Core
0	0	0	0	0	0	0	0	0	0	0	0	0	0	#DIV/0!	#DIV/0!	#DIV/0!	Core
0	0	0	0	0	0	0	0	0	0	0	0	0	0	#DIV/0!	#DIV/0!	#DIV/0!	Core
0	0	0	0	0	0	0	0	0	0	0	0	0	0	#DIV/0!	#DIV/0!	#DIV/0!	Core
0	0	0	0	0	0	0	0	0	0	0	0	0	0	#DIV/0!	#DIV/0!	#DIV/0!	Core
0	0	0	0	0	0	0	0	0	0	0	0	0	0	#DIV/0!	#DIV/0!	#DIV/0!	Core
0	0	0	0	0	0	0	0	0	0	0	0	0	0	#DIV/0!	#DIV/0!	#DIV/0!	Core
0	0	0	0	0	0	0	0	0	0	0	0	0	0	#DIV/0!	#DIV/0!	#DIV/0!	Core
0	0	0	0	0	0	0	0	0	0	0	0	0	0	#DIV/0!	#DIV/0!	#DIV/0!	Core
0	0	0	0	0	0	0	0	0	0	0	0	0	0	#DIV/0!	#DIV/0!	#DIV/0!	Core
0	0	0	0	0	0	0	0	0	0	0	0	0	0	#DIV/0!	#DIV/0!	#DIV/0!	Core
0	0	0	0	0	0	0	0	0	0	0	0	0	0	#DIV/0!	#DIV/0!	#DIV/0!	Core
0	0	0	0	0	0	0	0	0	0	0	0	0	0	#DIV/0!	#DIV/0!	#DIV/0!	Core
0	0	0	0	0	0	0	0	0	0	0	0	0	0	#DIV/0!	#DIV/0!	#DIV/0!	Core
0	0	0	0	0	0	0	0	0	0	0	0	0	0	#DIV/0!	#DIV/0!	#DIV/0!	Core
0	0	0	0	0	0	0	0	0	0	0	0	0	0	#DIV/0!	#DIV/0!	#DIV/0!	Core
0	0	0	0	0	0	0	0	0	0	0	0	0	0	#DIV/0!	#DIV/0!	#DIV/0!	Core
0	0	0	0	0	0	0	0	0	0	0	0	0	0	#DIV/0!	#DIV/0!	#DIV/0!	Core
0	0	0	0	0	0	0	0	0	0	0	0	0	0	#DIV/0!	#DIV/0!	#DIV/0!	Core
0	0	0	0	0	0	0	0	0	0	0	0	0	0	#DIV/0!	#DIV/0!	#DIV/0!	Core
0	0	0	0	0	0	0	0	0	0	0	0	0	0	#DIV/0!	#DIV/0!	#DIV/0!	Core
0	0	0	0	0	0	0	0	0	0	0	0	0	0	#DIV/0!	#DIV/0!	#DIV/0!	Core
0	0	0	0	0	0	0	0	0	0	0	0	0	0	#DIV/0!	#DIV/0!	#DIV/0!	Core
0	0	0	0	0	0	0	0	0	0	0	0	0	0	#DIV/0!	#DIV/0!	#DIV/0!	Core
0	0	0	0	0	0	0	0	0	0	0	0	0	0	#DIV/0!	#DIV/0!	#DIV/0!	Core
0	0	0	0	0	0	0	0	0	0	0	0	0	0	#DIV/0!	#DIV/0!	#DIV/0!	Core
0	0	0	0	0	0	0	0	0	0	0	0	0	0	#DIV/0!	#DIV/0!	#DIV/0!	Core
0	0	0	0	0	0	0	0	0	0	0	0	0	0	#DIV/0!	#DIV/0!	#DIV/0!	Core
0	0	0	0	0	0	0	0	0	0	0	0	0	0	#DIV/0!	#DIV/0!	#DIV/0!	Core
0	0	0	0	0	0	0	0	0	0	0	0	0	0	#DIV/0!	#DIV/0!	#DIV/0!	Core
0	0	0	0	0	0	0	0	0	0	0	0	0	0	#DIV/0!	#DIV/0!	#DIV/0!	Core
0	0	0	0	0	0	0	0	0	0	0	0	0	0	#DIV/0!	#DIV/0!	#DIV/0!	Core
0	0	0	0	0	0	0	0	0	0	0	0	0	0	#DIV/0!	#DIV/0!	#DIV/0!	Core
0	0	0	0	0	0	0	0	0	0	0	0	0	0	#DIV/0!	#DIV/0!	#DIV/0!	Core
0	0	0	0	0	0	0	0	0	0	0	0	0	0	#DIV/0!	#DIV/0!	#DIV/0!	Core
0	0	0	0	0	0	0	0	0	0	0	0	0	0	#DIV/0!	#DIV/0!	#DIV/0!	Core
0	0	0	0	0	0	0	0	0	0	0	0	0	0	#DIV/0!	#DIV/0!	#DIV/0!	Core
0	0	0	0	0	0	0	0	0	0	0	0	0	0	#DIV/0!	#DIV/0!	#DIV/0!	Core
0	0	0	0	0	0	0	0	0	0	0	0	0	0	#DIV/0!	#DIV/0!	#DIV/0!	Core
0	0	0	0	0	0	0	0	0	0	0	0	0	0	#DIV/0!	#DIV/0!	#DIV/0!	Core
0	0	0	0	0	0	0	0	0	0	0	0	0	0	#DIV/0!	#DIV/0!	#DIV/0!	Core
0	0	0	0	0	0	0	0	0	0	0	0	0	0	#DIV/0!	#DIV/0!	#DIV/0!	Core
0	0	0	0	0	0	0	0	0	0	0	0	0	0	#DIV/0!	#DIV/0!	#DIV/0!	Core
0	0	0	0	0	0	0	0	0	0	0	0	0	0	#DIV/0!	#DIV/0!	#DIV/0!	Core
0	0	0	0	0	0	0	0	0	0	0	0	0	0	#DIV/0!	#DIV/0!	#DIV/0!	Core
0	0	0	0	0	0	0	0	0	0	0	0	0	0	#DIV/0!	#DIV/0!	#DIV/0!	Core
0	0	0	0	0	0	0	0	0	0	0	0	0	0	#DIV/0!	#DIV/0!	#DIV/0!	Core
0	0	0	0	0	0	0	0	0	0	0	0	0	0	#DIV/0!	#DIV/0!	#DIV/0!	Core
0	0	0	0	0	0	0	0	0	0	0	0	0	0	#DIV/0!	#DIV/0!	#DIV/0!	Core
0	0	0	0	0	0	0	0	0	0	0	0	0	0	#DIV/0!	#DIV/0!	#DIV/0!	Core
0	0	0	0	0	0	0	0	0	0	0	0	0	0	#DIV/0!	#DIV/0!	#DIV/0!	Core
0	0	0	0	0	0	0	0	0	0	0	0	0	0	#DIV/0!	#DIV/0!	#DIV/0!	Core
0	0	0	0	0	0	0	0	0	0	0	0	0	0	#DIV/0!	#DIV/0!	#DIV/0!	Core
0	0	0	0	0	0	0	0	0	0	0	0	0	0	#DIV/0!	#DIV/0!	#DIV/0!	Core
0	0	0	0	0	0	0	0	0	0	0	0	0	0	#DIV/0!	#DIV/0!	#DIV/0!	Core
0	0	0	0	0	0	0	0	0	0	0	0	0	0	#DIV/0!	#DIV/0!	#DIV/0!	Core
0	0	0	0	0	0	0	0	0	0	0	0	0	0	#DIV/0!	#DIV/0!	#DIV/0!	Core
0	0	0	0	0	0	0	0	0	0	0	0	0	0	#DIV/0!	#DIV/0!	#DIV/0!	Core
0	0	0	0	0	0	0	0	0	0	0	0	0	0	#DIV/0!	#DIV/0!	#DIV/0!	Core
0	0	0	0	0	0	0	0	0	0	0	0	0	0	#DIV/0!	#DIV/0!	#DIV/0!	Core
0	0	0	0	0	0	0	0	0	0	0	0	0	0	#DIV/0!	#DIV/0!	#DIV/0!	Core
0	0	0	0	0	0	0	0	0	0	0	0	0	0	#DIV/0!	#DIV/0!	#DIV/0!	Core
0	0	0	0	0	0	0	0	0	0	0	0	0	0	#DIV/0!	#DIV/0!	#DIV/0!	Core
0	0	0	0	0	0	0	0	0	0	0	0	0	0	#DIV/0!	#DIV/0!	#DIV/0!	Core
0	0	0	0	0	0	0	0	0	0	0	0	0	0	#DIV/0!	#DIV/0!	#DIV/0!	Core
0	0	0	0	0	0	0	0	0	0	0	0	0	0	#DIV/0!	#DIV/0!	#DIV/0!	Core
0	0	0	0	0	0	0	0	0	0	0	0	0	0	#DIV/0!	#DIV/0!	#DIV/0!	Core
0	0	0	0	0	0	0	0	0	0	0	0	0	0	#DIV/0!	#DIV/0!	#DIV/0!	Core
0	0	0	0	0	0	0	0	0	0	0	0	0	0	#DIV/0!	#DIV/0!	#DIV/0!	Core
0	0	0	0	0	0	0	0	0	0	0	0	0	0	#DIV/0!	#DIV/0!	#DIV/0!	Core
0	0	0	0	0	0	0	0	0	0	0	0	0	0	#DIV/0!	#DIV/0!	#DIV/0!	Core
0	0	0	0	0	0	0	0	0	0	0	0	0	0	#DIV/0!	#DIV/0!	#DIV/0!	Core
0	0	0	0	0	0	0	0	0	0	0	0	0	0	#DIV/0!	#DIV/0!	#DIV/0!	Core
0	0	0	0	0	0	0	0	0	0	0	0	0	0	#DIV/0!	#DIV/0!	#DIV/0!	Core
0	0	0	0	0	0	0	0	0	0	0	0	0	0	#DIV/0!	#DIV/0!	#DIV/0!	Core
0	0	0	0	0	0	0	0	0	0	0	0	0	0	#DIV/0!	#DIV/0!	#DIV/0!	Core
0	0	0	0	0	0	0	0	0	0	0	0	0	0	#DIV/0!	#DIV/0!	#DIV/0!	Core
0	0	0	0	0	0	0	0	0	0	0	0	0	0	#DIV/0!	#DIV/0!	#DIV/0!	Core
0	0	0	0	0	0	0	0	0	0	0	0	0	0	#DIV/0!	#DIV/0!	#DIV/0!	Core
0	0	0	0	0	0	0	0	0	0	0	0	0	0	#DIV/0!	#DIV/0!	#DIV/0!	Core
0	0	0	0	0	0	0	0	0	0	0	0	0	0	#DIV/0!	#DIV/0!	#DIV/0!	Core
0	0	0	0	0	0	0	0	0	0	0	0	0	0	#DIV/0!	#DIV/0!	#DIV/0!	Core
0	0	0	0	0	0	0	0	0	0	0	0	0	0	#DIV/0!	#DIV/0!	#DIV/0!	Core
0	0	0	0	0	0	0	0	0	0	0	0	0	0	#DIV/0!	#DIV/0!	#DIV/0!	Core
0	0	0	0	0	0	0	0	0	0	0	0	0	0	#DIV/0!	#DIV/0!	#DIV/0!	Core
0	0	0	0	0	0	0	0	0	0	0	0	0	0	#DIV/0!	#DIV/0!	#DIV/0!	Core
0	0	0	0	0	0	0	0	0	0	0	0	0	0	#DIV/0!	#DIV/0!	#DIV/0!	Core
0	0	0	0	0	0	0	0	0	0	0	0	0	0	#DIV/0!	#DIV/0!	#DIV/0!	Core
0	0	0	0	0	0	0	0	0	0	0	0	0	0	#DIV/0!	#DIV/0!	#DIV/0!	Core
0	0	0	0	0	0	0	0	0	0	0	0	0	0	#DIV/0!	#DIV/0!	#DIV/0!	Core
0	0	0	0	0	0	0	0	0	0	0	0	0	0	#DIV/0!	#DIV/0!	#DIV/0!	Core
0	0	0	0	0	0	0	0	0	0	0	0	0	0	#DIV/0!	#DIV/0!	#DIV/0!	Core
0	0	0	0	0	0	0	0	0	0	0	0	0	0	#DIV/0!	#DIV/0!	#DIV/0!	Core
0	0	0	0	0	0	0	0	0	0	0	0	0	0	#DIV/0!	#DIV/0!	#DIV/0!	Core
0	0	0	0	0	0	0	0	0	0	0	0	0	0	#DIV/0!	#DIV/0!	#DIV/0!	Core
0	0	0	0	0	0	0	0	0	0	0	0	0	0	#DIV/0!	#DIV/0!	#DIV/0!	Core
0	0	0	0	0	0	0	0	0	0	0	0	0	0	#DIV/0!	#DIV/0!	#DIV/0!	Core
0	0	0	0	0	0	0	0	0	0	0	0	0	0	#DIV/0!	#DIV/0!	#DIV/0!	Core
0	0	0	0	0	0	0	0	0	0	0	0	0	0	#DIV/0!	#DIV/0!	#DIV/0!	Core
0	0	0	0	0	0	0	0	0	0	0	0	0	0	#DIV/0!	#DIV/0!	#DIV/0!	Core
0	0	0	0	0	0	0	0	0	0	0	0	0	0	#DIV/0!	#DIV/0!	#DIV/0!	Core
0	0	0	0	0	0	0	0	0	0	0	0	0	0	#DIV/0!	#DIV/0!	#DIV/0!	Core
0	0	0	0	0	0	0	0	0	0	0	0	0	0	#DIV/0!	#DIV/0!	#DIV/0!	Core
0	0	0	0	0	0	0	0	0	0	0	0	0	0	#DIV/0!	#DIV/0!	#DIV/0!	Core
0	0	0	0	0	0	0	0	0	0	0	0	0	0	#DIV/0!	#DIV/0!	#DIV/0!	Core
0	0	0	0	0	0	0	0	0	0	0	0	0	0	#DIV/0!	#DIV/0!	#DIV/0!	Core
0	0	0	0	0	0	0	0	0	0	0	0	0	0	#DIV/0!	#DIV/0!	#DIV/0!	Core
0	0	0	0	0	0	0	0	0	0	0	0	0	0	#DIV/0!	#DIV/0!	#DIV/0!	Core
0	0	0	0	0	0	0	0	0	0	0	0	0	0	#DIV/0!	#DIV/0!	#DIV/0!	Core
0	0	0	0	0	0	0	0	0	0	0	0	0	0	#DIV/0!	#DIV/0!	#DIV/0!	Core
0	0	0	0	0	0	0	0	0	0	0	0	0	0	#DIV/0!	#DIV/0!	#DIV/0!	Core
0	0	0	0	0	0	0	0	0	0	0	0	0	0	#DIV/0!	#DIV/0!	#DIV/0!	Core
0	0	0	0	0	0	0	0	0	0	0	0	0	0	#DIV/0!	#DIV/0!	#DIV/0!	Core
0	0	0	0	0	0	0	0	0	0	0	0	0	0	#DIV/0!	#DIV/0!	#DIV/0!	Core
0	0	0	0	0	0	0	0	0	0	0	0	0	0	#DIV/0!	#DIV/0!	#DIV/0!	Core
0	0	0	0	0	0	0	0	0	0	0	0	0	0	#DIV/0!	#DIV/0!	#DIV/0!	Core
0	0	0	0	0	0	0	0	0	0	0	0	0	0	#DIV/0!	#DIV/0!	#DIV/0!	Core
0	0	0	0	0	0	0	0	0	0	0	0	0	0	#DIV/0!	#DIV/0!	#DIV/0!	Core
0	0	0	0	0	0	0	0	0	0	0	0	0	0	#DIV/0!	#DIV/0!	#DIV/0!	Core
0	0	0	0	0	0	0	0	0	0	0	0	0	0	#DIV/0!	#DIV/0!	#DIV/0!	Core
0	0	0	0	0	0	0	0	0	0	0	0	0	0	#DIV/0!	#DIV/0!	#DIV/0!	Core
0	0	0	0	0	0	0	0	0	0	0	0	0	0	#DIV/0!	#DIV/0!	#DIV/0!	Core
0	0	0	0	0	0	0	0	0	0	0	0	0	0	#DIV/0!	#DIV/0!	#DIV/0!	Core
0	0	0	0	0	0	0	0	0	0	0	0	0	0	#DIV/0!	#DIV/0!	#DIV/0!	Core
0	0	0	0	0	0	0	0	0	0	0	0	0	0	#DIV/0!	#DIV/0!	#DIV/0!	Core
0	0	0	0	0	0	0	0	0	0	0	0	0	0	#DIV/0!	#DIV/0!	#DIV/0!	Core
0	0	0	0	0	0	0	0	0	0	0	0	0	0	#DIV/0!	#DIV/0!	#DIV/0!	Core
0	0	0	0	0	0	0	0	0	0	0	0	0	0	#DIV/0!	#DIV/0!	#DIV/0!	Core
0	0	0	0	0	0	0	0	0	0	0	0	0	0	#DIV/0!	#DIV/0!	#DIV/0!	Core
0	0	0	0	0	0	0	0	0	0	0	0	0	0	#DIV/0!	#DIV/0!	#DIV/0!	Core
0	0	0	0	0	0	0	0	0	0	0	0	0	0	#DIV/0!	#DIV/0!	#DIV/0!	Core
0	0	0	0	0	0	0	0	0	0	0	0	0	0	#DIV/0!	#DIV/0!	#DIV/0!	Core
0	0	0	0	0	0	0	0	0	0	0	0	0	0	#DIV/0!	#DIV/0!	#DIV/0!	Core
0	0	0	0	0	0	0	0	0	0	0	0	0	0	#DIV/0!	#DIV/0!	#DIV/0!	Core
0	0	0	0	0	0	0	0	0	0	0	0	0	0	#DIV/0!	#DIV/0!	#DIV/0!	Core
0	0	0	0	0	0	0	0	0	0	0	0	0	0	#DIV/0!	#DIV/0!	#DIV/0!	Core
0	0	0	0	0	0	0	0	0	0	0	0	0	0	#DIV/0!	#DIV/0!	#DIV/0!	Core
0	0	0	0	0	0	0	0	0	0	0	0	0	0	#DIV/0!	#DIV/0!	#DIV/0!	Core
0	0	0	0	0	0	0	0	0	0	0	0	0	0	#DIV/0!	#DIV/0!	#DIV/0!	Core
0	0	0	0	0	0	0	0	0	0	0	0	0	0	#DIV/0!	#DIV/0!	#DIV/0!	Core

## Sheet: S4. U-Pb Chil4
Sample Name: Chilhowee Grp	575441	3699937						207/235		206/238		207/206		Best age
Grain #	[U] ppm	U/Th	207/235	2σ error	206/238	2σ error	RHO	Age Ma	2σ error	Age (Ma)	2σ error	Age (Ma)	2σ error	(Ma)	2σ error	% Discordance*	Th/U
Chil4.21	338	57.5	1.692	0.047	0.1716	0.003	0	1009	17	1023	17	995	39	1023	17	1.38751	0.0173913
Chil4.02	130.3	12.58	1.774	0.084	0.1652	0.004	0	1027	33	984	22	1120	110	984	22	4.18695	0.0794913
Chil4.06	3050	8.04	0.759	0.03	0.0807	0.0029	0	569	16	500	17	898	42	500	17	12.1265	0.124378
Chil4.99	247	5.99	3.549	0.098	0.2755	0.0058	0	1530	22	1566	30	1492	42	1492	42	4.95979	0.166945
Chil4.77	333	5.6	2.166	0.076	0.2116	0.0047	0	1160	25	1236	25	1057	53	1057	25	6.55172	0.178571
Chil4.12	481	5.36	2.42	0.11	0.2188	0.008	0	1243	35	1271	43	1217	49	1217	49	4.43714	0.186567
Chil4.128	490	5.1	4.25	0.29	0.304	0.015	0	1618	65	1696	79	1548	63	1548	63	9.56072	0.196078
Chil4.105	256	4.83	2.86	0.1	0.2464	0.0067	0	1370	28	1416	35	1314	65	1314	65	7.76256	0.207039
Chil4.113	218	4.105	2.198	0.065	0.209	0.0033	0	1181	20	1223	18	1122	64	1122	18	3.55631	0.243605
Chil4.70	164	4.07	2.084	0.059	0.1971	0.0043	0	1137	20	1158	24	1117	62	1158	24	1.84697	0.2457
Chil4.100	137.1	4	2.2	0.068	0.2084	0.0047	0	1173	21	1219	25	1068	61	1068	25	3.92157	0.25
Chil4.23	717	3.96	2.457	0.05	0.2128	0.0055	0	1260	15	1241	30	1288	37	1288	37	3.64907	0.252525
Chil4.62	131.7	3.919	1.564	0.061	0.1605	0.0023	0	946	25	959	13	926	70	959	13	1.37421	0.255167
Chil4.10	416	3.86	2.718	0.058	0.2322	0.0045	0	1331	15	1345	24	1322	36	1322	36	1.73979	0.259067
Chil4.121	133	3.713	2.83	0.14	0.2414	0.0041	0	1354	33	1393	22	1316	93	1316	93	5.85106	0.269324
Chil4.42	117	3.7	2.962	0.09	0.2404	0.0043	0	1400	24	1387	22	1386	71	1386	71	0.0721501	0.27027
Chil4.88	168	3.68	2.699	0.092	0.2314	0.0048	0	1329	26	1340	25	1319	70	1319	70	1.59212	0.271739
Chil4.107	394	3.67	2.702	0.055	0.2373	0.0041	0	1327	15	1371	21	1259	40	1259	40	8.89595	0.27248
Chil4.59	691	3.575	2.434	0.057	0.208	0.0044	0	1254	16	1217	23	1331	26	1331	26	8.56499	0.27972
Chil4.71	158	3.54	2.57	0.066	0.218	0.0044	0	1292	19	1270	23	1332	52	1332	52	4.65465	0.282486
Chil4.101	200	3.285	2.606	0.079	0.229	0.0047	0	1298	22	1327	24	1262	52	1262	52	5.15055	0.304414
Chil4.115	119	3.245	1.93	0.11	0.1818	0.0049	0	1095	34	1078	28	1110	110	1078	28	1.55251	0.308166
Chil4.69	121	3.07	1.772	0.064	0.1748	0.0051	0	1029	23	1036	28	1083	90	1036	28	0.680272	0.325733
Chil4.76	170	2.87	2.641	0.083	0.2249	0.0035	0	1307	22	1307	19	1273	60	1273	60	2.67086	0.348432
Chil4.07	131	2.748	2.645	0.082	0.2173	0.0045	0	1304	22	1269	23	1372	71	1372	71	7.50729	0.363901
Chil4.01	113	2.714	2.074	0.081	0.1967	0.0043	0	1133	26	1156	23	1148	74	1156	23	2.03001	0.36846
Chil4.24	371	2.7	2.426	0.045	0.2136	0.0033	0	1247	13	1247	18	1244	35	1244	35	0.241158	0.37037
Chil4.03	75.8	2.7	3.1	0.18	0.2233	0.0075	0	1402	42	1295	40	1560	120	1560	120	16.9872	0.37037
Chil4.55	162	2.655	3.21	0.15	0.2389	0.0044	0	1443	37	1383	23	1588	89	1588	89	12.9093	0.376648
Chil4.110	193	2.65	2.33	0.12	0.199	0.01	0	1226	36	1183	52	1362	75	1183	52	3.50734	0.377358
Chil4.117	58.4	2.585	2.83	0.22	0.2352	0.0068	0	1327	44	1366	32	1230	100	1230	100	11.0569	0.386847
Chil4.13	153	2.559	2.8	0.2	0.2159	0.0043	0	1317	46	1255	21	1350	110	1350	110	7.03704	0.390778
Chil4.54	132.1	2.552	2.615	0.065	0.226	0.004	0	1299	18	1312	21	1294	52	1294	52	1.39104	0.39185
Chil4.127	1600	2.55	2.01	0.19	0.158	0.013	0	1062	59	930	69	1432	50	930	69	12.4294	0.392157
Chil4.130	243	2.542	2.797	0.056	0.2391	0.0031	0	1353	15	1381	16	1299	41	1299	41	6.31255	0.393391
Chil4.78	218	2.44	2.556	0.07	0.2274	0.0038	0	1287	20	1323	19	1242	56	1242	56	6.52174	0.409836
Chil4.81	81.3	2.426	2.75	0.11	0.2387	0.0045	0	1335	26	1378	24	1237	74	1237	74	11.3985	0.412201
Chil4.47	220	2.408	2.596	0.064	0.2203	0.0038	0	1294	17	1291	21	1304	45	1304	45	0.996933	0.415282
Chil4.41	31.7	2.38	2.75	0.16	0.2104	0.0091	0	1334	44	1224	49	1470	140	1470	140	16.7347	0.420168
Chil4.65	28.8	2.32	2.35	0.14	0.1964	0.008	0	1206	44	1151	44	1280	170	1151	44	4.56053	0.431034
Chil4.98	140	2.306	2.344	0.076	0.2065	0.0049	0	1216	23	1208	26	1249	79	1249	79	3.28263	0.433651
Chil4.17	112.6	2.304	2.69	0.1	0.2224	0.0036	0	1334	31	1293	19	1419	77	1419	77	8.87949	0.434028
Chil4.97	72.5	2.301	2.472	0.092	0.2163	0.0051	0	1251	27	1264	26	1232	83	1232	83	2.5974	0.434594
Chil4.18	85.6	2.3	2.94	0.11	0.2318	0.0049	0	1380	28	1342	26	1450	78	1450	78	7.44828	0.434783
Chil4.39	89.3	2.278	2.107	0.068	0.185	0.0063	0	1146	23	1095	34	1278	75	1095	34	4.45026	0.438982
Chil4.27	93.3	2.277	2.38	0.14	0.2011	0.0037	0	1208	30	1183	19	1247	72	1183	19	2.06954	0.439174
Chil4.103	168	2.266	2.633	0.072	0.2368	0.0049	0	1315	19	1372	24	1248	60	1248	60	9.9359	0.441306
Chil4.85	354	2.24	2.617	0.093	0.2246	0.0058	0	1307	25	1304	31	1257	73	1257	73	3.73906	0.446429
Chil4.25	144	2.216	2.505	0.067	0.2205	0.0055	0	1278	17	1282	29	1269	50	1269	50	1.02443	0.451264
Chil4.108	405	2.2	0.947	0.063	0.1086	0.0021	0	668	20	666	12	661	78	666	12	0.299401	0.454545
Chil4.123	106	2.19	1.704	0.094	0.1621	0.0079	0	995	36	974	42	1140	100	974	42	2.11055	0.456621
Chil4.67	97	2.184	2.65	0.12	0.2308	0.0051	0	1307	28	1337	27	1265	76	1265	76	5.6917	0.457875
Chil4.31	19.9	2.17	2.54	0.2	0.195	0.011	0	1246	56	1141	57	1390	190	1141	57	8.42697	0.460829
Chil4.114	157	2.114	2.762	0.066	0.2337	0.0047	0	1342	18	1352	24	1350	60	1350	60	0.148148	0.473037
Chil4.14	123	2.07	2.53	0.13	0.2097	0.0048	0	1267	32	1229	25	1320	87	1320	87	6.89394	0.483092
Chil4.26	221	2.058	2.702	0.059	0.2276	0.0036	0	1325	16	1321	19	1339	40	1339	40	1.34429	0.485909
Chil4.75	102.7	2.033	2.582	0.08	0.2291	0.0055	0	1290	22	1328	29	1264	60	1264	60	5.06329	0.491884
Chil4.46	63.9	2.022	2.02	0.11	0.1873	0.0044	0	1117	36	1105	24	1090	110	1105	24	1.07431	0.49456
Chil4.50	43.3	1.996	2.59	0.11	0.2217	0.0079	0	1290	30	1286	43	1348	95	1348	95	4.59941	0.501002
Chil4.52	37.5	1.991	2.13	0.11	0.1893	0.0079	0	1137	37	1112	44	1220	110	1112	44	2.19877	0.50226
Chil4.19	142	1.987	2.376	0.075	0.2127	0.004	0	1230	25	1242	21	1222	72	1222	72	1.63666	0.503271
Chil4.120	274	1.932	1.784	0.064	0.1749	0.0055	0	1034	23	1042	29	1054	71	1042	29	0.773694	0.517598
Chil4.106	65.7	1.917	2.29	0.11	0.2126	0.0066	0	1195	36	1245	35	1170	110	1170	35	4.1841	0.521648
Chil4.45	59.5	1.901	2.68	0.1	0.2226	0.0042	0	1321	26	1298	21	1354	71	1354	71	4.13589	0.526039
Chil4.74	108	1.9	2.65	0.1	0.2161	0.0066	0	1306	27	1258	36	1369	90	1369	90	8.10811	0.526316
Chil4.38	26	1.859	2.6	0.21	0.1894	0.005	0	1262	49	1116	27	1420	150	1116	27	11.5689	0.537924
Chil4.16	129	1.851	2.09	0.11	0.1837	0.0049	0	1137	33	1085	27	1240	120	1085	27	4.57344	0.540249
Chil4.91	167	1.818	2.724	0.078	0.2306	0.0038	0	1327	20	1336	20	1306	61	1306	61	2.29709	0.550055
Chil4.58	72.1	1.81	2.453	0.098	0.2126	0.0086	0	1259	29	1236	48	1310	73	1310	73	5.64885	0.552486
Chil4.131	186	1.78	2.26	0.092	0.2077	0.006	0	1181	27	1220	31	1214	87	1214	87	0.494234	0.561798
Chil4.109	113.4	1.773	2.723	0.08	0.2382	0.0048	0	1327	21	1380	24	1239	65	1239	65	11.3801	0.564016
Chil4.44	31.4	1.772	2.44	0.12	0.21	0.0061	0	1241	33	1226	33	1310	120	1310	120	6.41221	0.564334
Chil4.30	42.5	1.677	2.82	0.17	0.2213	0.0061	0	1338	40	1296	32	1410	110	1410	110	8.08511	0.596303
Chil4.15	153	1.672	2.708	0.083	0.2282	0.0047	0	1325	22	1324	25	1330	56	1330	56	0.451128	0.598086
Chil4.04	341	1.67	2.338	0.049	0.2082	0.0038	0	1220	15	1218	21	1235	39	1235	39	1.37652	0.598802
Chil4.64	46.9	1.61	2.31	0.14	0.207	0.0061	0	1196	39	1215	32	1120	110	1120	32	1.58863	0.621118
Chil4.57	31	1.606	2.5	0.34	0.1943	0.0084	0	1190	47	1145	47	1300	140	1145	47	3.78151	0.622665
Chil4.33	242	1.598	2.456	0.053	0.2064	0.0033	0	1257	15	1212	18	1347	35	1347	35	10.0223	0.625782
Chil4.73	98	1.565	2.642	0.099	0.2312	0.0043	0	1319	30	1343	21	1305	69	1305	69	2.91188	0.638978
Chil4.48	20.1	1.548	3	0.31	0.2085	0.008	0	1338	63	1222	42	1490	180	1490	180	17.9866	0.645995
Chil4.43	43	1.538	2.98	0.23	0.2126	0.0062	0	1363	50	1245	32	1540	130	1540	130	19.1558	0.650195
Chil4.37	30.8	1.428	2.14	0.16	0.184	0.013	0	1122	48	1058	39	1210	170	1058	39	5.7041	0.70028
Chil4.34	40.6	1.425	1.717	0.091	0.1616	0.0068	0	1000	34	979	37	1080	110	979	37	2.1	0.701754
Chil4.104	52.6	1.404	1.83	0.11	0.1632	0.0051	0	1030	39	972	28	1110	140	972	28	5.63107	0.712251
Chil4.94	87.6	1.369	2.53	0.12	0.2256	0.0046	0	1300	35	1310	24	1210	91	1210	91	8.26446	0.73046
Chil4.63	30.4	1.311	2.75	0.14	0.2331	0.0062	0	1340	36	1348	33	1300	110	1300	110	3.69231	0.762777
Chil4.102	116	1.304	2.594	0.096	0.2201	0.0065	0	1286	27	1279	35	1286	77	1286	77	0.544323	0.766871
Chil4.60	94	1.285	2.283	0.085	0.1898	0.0049	0	1196	26	1118	27	1385	81	1118	27	6.52174	0.77821
Chil4.40	75	1.28	3.03	0.13	0.2444	0.006	0	1401	31	1411	30	1395	76	1395	76	1.14695	0.78125
Chil4.86	80	1.246	2.72	0.33	0.219	0.011	0	1270	37	1266	57	1310	110	1310	110	3.35878	0.802568
Chil4.72	117	1.244	2.15	0.12	0.1656	0.0085	0	1142	38	982	48	1504	80	982	48	14.0105	0.803859
Chil4.68	120.4	1.208	0.974	0.088	0.1041	0.0019	0	670	37	638	11	670	130	638	11	4.77612	0.827815
Chil4.36	235	1.205	2.959	0.055	0.2484	0.0031	0	1394	14	1429	16	1342	39	1342	39	6.48286	0.829876
Chil4.125	76.6	1.157	1.8	0.11	0.1427	0.0054	0	1025	36	857	31	1430	140	857	31	16.3902	0.864304
Chil4.90	72.6	1.095	2.203	0.097	0.1773	0.0057	0	1167	29	1054	33	1379	83	1054	33	9.68295	0.913242
Chil4.79	74.8	1.088	1.71	0.12	0.1575	0.0052	0	983	40	941	29	1030	150	941	29	4.27263	0.919118
Chil4.96	95	1.081	2.47	0.1	0.2259	0.0059	0	1248	32	1310	32	1258	97	1258	97	4.13355	0.925069
Chil4.29	54.5	1.077	2.94	0.17	0.2247	0.0052	0	1380	42	1305	28	1490	100	1490	100	12.4161	0.928505
Chil4.51	41.7	1.049	1.62	0.1	0.143	0.012	0	960	40	853	60	1310	150	853	60	11.1458	0.953289
Chil4.66	31.6	1.03	1.86	0.17	0.147	0.0084	0	1013	46	878	47	1340	170	878	47	13.3268	0.970874
Chil4.111	46.8	1.002	2.34	0.18	0.1905	0.0054	0	1186	47	1122	29	1260	120	1122	29	5.39629	0.998004
Chil4.53	34.7	0.943	2.74	0.14	0.2315	0.0051	0	1317	35	1340	26	1307	99	1307	99	2.52487	1.06045
Chil4.61	37.5	0.918	3.08	0.31	0.2251	0.0077	0	1359	48	1304	41	1370	120	1370	120	4.81752	1.08932
Chil4.20	244	0.607	2.344	0.07	0.1775	0.0058	0	1217	22	1051	32	1530	48	1051	32	13.6401	1.64745
Chil4.82	396	0.516	2.724	0.079	0.2029	0.0054	0	1329	22	1192	28	1545	36	1192	28	10.3085	1.93798
Chil4.05	2650	1.202	1.276	0.091	0.1003	0.0064	0	803	44	612	38	1418	38	DISC	DISC	23.7858
Chil4.08	591	0.767	6.25	0.27	0.268	0.01	0	1988	36	1520	52	2523	23	DISC	DISC	39.7543
Chil4.11	5320	1.557	0.499	0.011	0.0479	0.001	0	409.9	7.6	301.2	6.4	1089	36	DISC	DISC	26.5187
Chil4.126	4.5	0.532	37.9	5.4	0.535	0.046	0	3470	150	2700	190	4130	190	DISC	DISC	34.6247
Chil4.129	672	1.307	6.36	0.39	0.269	0.015	0	1970	58	1520	75	2516	27	DISC	DISC	39.5866
Chil4.132	290	5.06	3.346	0.09	0.2313	0.0037	0	1487	20	1340	19	1675	51	DISC	DISC	20
Chil4.32	81.1	1.05	4.82	0.42	0.2483	0.0061	0	1713	67	1427	32	2020	130	DISC	DISC	29.3564
Chil4.56	49.2	2.74	3	0.18	0.216	0.011	0	1390	44	1251	61	1670	140	DISC	DISC	25.0898
Chil4.84	69	2.18	157	45	1.69	0.43	0	3220	380	4680	810	2840	290	DISC	DISC	64.7887
Chil4.95	5.56	0.1178	28.6	1.6	0.384	0.028	0	3415	54	2060	120	4400	110	DISC	DISC	53.1818
Chil4.09	0.16	0	0	0	0	0	0	0	0	0	0	0	0	#DIV/0!	#DIV/0!	#DIV/0!
Chil4.112	-0.21	0	0	0	0	0	0	0	0	0	0	0	0	#DIV/0!	#DIV/0!	#DIV/0!
Chil4.116	-1.21	0	0	0	0	0	0	0	0	0	0	0	0	#DIV/0!	#DIV/0!	#DIV/0!
Chil4.118	-1.127	0	0	0	0	0	0	0	0	0	0	0	0	#DIV/0!	#DIV/0!	#DIV/0!
Chil4.119	0.2	0	0	0	0	0	0	0	0	0	0	0	0	#DIV/0!	#DIV/0!	#DIV/0!
Chil4.122	0.172	0	0	0	0	0	0	0	0	0	0	0	0	#DIV/0!	#DIV/0!	#DIV/0!
Chil4.124	0.08	0	0	0	0	0	0	0	0	0	0	0	0	#DIV/0!	#DIV/0!	#DIV/0!
Chil4.22	-1.404	0	0	0	0	0	0	0	0	0	0	0	0	#DIV/0!	#DIV/0!	#DIV/0!
Chil4.28	0.4	0	0	0	0	0	0	0	0	0	0	0	0	#DIV/0!	#DIV/0!	#DIV/0!
Chil4.35	-0.105	0	0	0	0	0	0	0	0	0	0	0	0	#DIV/0!	#DIV/0!	#DIV/0!
Chil4.49	0.047	0	0	0	0	0	0	0	0	0	0	0	0	#DIV/0!	#DIV/0!	#DIV/0!
Chil4.80	-0.017	0	0	0	0	0	0	0	0	0	0	0	0	#DIV/0!	#DIV/0!	#DIV/0!
Chil4.83	0.027	0	0	0	0	0	0	0	0	0	0	0	0	#DIV/0!	#DIV/0!	#DIV/0!
Chil4.87	-0.03	0	0	0	0	0	0	0	0	0	0	0	0	#DIV/0!	#DIV/0!	#DIV/0!
Chil4.89	0.17	0	0	0	0	0	0	0	0	0	0	0	0	#DIV/0!	#DIV/0!	#DIV/0!
Chil4.92	-1.44	0	0	0	0	0	0	0	0	0	0	0	0	#DIV/0!	#DIV/0!	#DIV/0!
Chil4.93	-1.58	0	0	0	0	0	0	0	0	0	0	0	0	#DIV/0!	#DIV/0!	#DIV/0!
0	0	0	0	0	0	0	0	0	0	0	0	0	0	#DIV/0!	#DIV/0!	#DIV/0!	Core
0	0	0	0	0	0	0	0	0	0	0	0	0	0	#DIV/0!	#DIV/0!	#DIV/0!	Core
0	0	0	0	0	0	0	0	0	0	0	0	0	0	#DIV/0!	#DIV/0!	#DIV/0!	Core
0	0	0	0	0	0	0	0	0	0	0	0	0	0	#DIV/0!	#DIV/0!	#DIV/0!	Core
0	0	0	0	0	0	0	0	0	0	0	0	0	0	#DIV/0!	#DIV/0!	#DIV/0!	Core
0	0	0	0	0	0	0	0	0	0	0	0	0	0	#DIV/0!	#DIV/0!	#DIV/0!	Core
0	0	0	0	0	0	0	0	0	0	0	0	0	0	#DIV/0!	#DIV/0!	#DIV/0!	Core
0	0	0	0	0	0	0	0	0	0	0	0	0	0	#DIV/0!	#DIV/0!	#DIV/0!	Core
0	0	0	0	0	0	0	0	0	0	0	0	0	0	#DIV/0!	#DIV/0!	#DIV/0!	Core
0	0	0	0	0	0	0	0	0	0	0	0	0	0	#DIV/0!	#DIV/0!	#DIV/0!	Core
0	0	0	0	0	0	0	0	0	0	0	0	0	0	#DIV/0!	#DIV/0!	#DIV/0!	Core
0	0	0	0	0	0	0	0	0	0	0	0	0	0	#DIV/0!	#DIV/0!	#DIV/0!	Core
0	0	0	0	0	0	0	0	0	0	0	0	0	0	#DIV/0!	#DIV/0!	#DIV/0!	Core
0	0	0	0	0	0	0	0	0	0	0	0	0	0	#DIV/0!	#DIV/0!	#DIV/0!	Core
0	0	0	0	0	0	0	0	0	0	0	0	0	0	#DIV/0!	#DIV/0!	#DIV/0!	Core
0	0	0	0	0	0	0	0	0	0	0	0	0	0	#DIV/0!	#DIV/0!	#DIV/0!	Core
0	0	0	0	0	0	0	0	0	0	0	0	0	0	#DIV/0!	#DIV/0!	#DIV/0!	Core
0	0	0	0	0	0	0	0	0	0	0	0	0	0	#DIV/0!	#DIV/0!	#DIV/0!	Core
0	0	0	0	0	0	0	0	0	0	0	0	0	0	#DIV/0!	#DIV/0!	#DIV/0!	Core
0	0	0	0	0	0	0	0	0	0	0	0	0	0	#DIV/0!	#DIV/0!	#DIV/0!	Core
0	0	0	0	0	0	0	0	0	0	0	0	0	0	#DIV/0!	#DIV/0!	#DIV/0!	Core
0	0	0	0	0	0	0	0	0	0	0	0	0	0	#DIV/0!	#DIV/0!	#DIV/0!	Core
0	0	0	0	0	0	0	0	0	0	0	0	0	0	#DIV/0!	#DIV/0!	#DIV/0!	Core
0	0	0	0	0	0	0	0	0	0	0	0	0	0	#DIV/0!	#DIV/0!	#DIV/0!	Core
0	0	0	0	0	0	0	0	0	0	0	0	0	0	#DIV/0!	#DIV/0!	#DIV/0!	Core
0	0	0	0	0	0	0	0	0	0	0	0	0	0	#DIV/0!	#DIV/0!	#DIV/0!	Core
0	0	0	0	0	0	0	0	0	0	0	0	0	0	#DIV/0!	#DIV/0!	#DIV/0!	Core
0	0	0	0	0	0	0	0	0	0	0	0	0	0	#DIV/0!	#DIV/0!	#DIV/0!	Core
0	0	0	0	0	0	0	0	0	0	0	0	0	0	#DIV/0!	#DIV/0!	#DIV/0!	Core
0	0	0	0	0	0	0	0	0	0	0	0	0	0	#DIV/0!	#DIV/0!	#DIV/0!	Core
0	0	0	0	0	0	0	0	0	0	0	0	0	0	#DIV/0!	#DIV/0!	#DIV/0!	Core
0	0	0	0	0	0	0	0	0	0	0	0	0	0	#DIV/0!	#DIV/0!	#DIV/0!	Core
0	0	0	0	0	0	0	0	0	0	0	0	0	0	#DIV/0!	#DIV/0!	#DIV/0!	Core
0	0	0	0	0	0	0	0	0	0	0	0	0	0	#DIV/0!	#DIV/0!	#DIV/0!	Core
0	0	0	0	0	0	0	0	0	0	0	0	0	0	#DIV/0!	#DIV/0!	#DIV/0!	Core
0	0	0	0	0	0	0	0	0	0	0	0	0	0	#DIV/0!	#DIV/0!	#DIV/0!	Core
0	0	0	0	0	0	0	0	0	0	0	0	0	0	#DIV/0!	#DIV/0!	#DIV/0!	Core
0	0	0	0	0	0	0	0	0	0	0	0	0	0	#DIV/0!	#DIV/0!	#DIV/0!	Core
0	0	0	0	0	0	0	0	0	0	0	0	0	0	#DIV/0!	#DIV/0!	#DIV/0!	Core
0	0	0	0	0	0	0	0	0	0	0	0	0	0	#DIV/0!	#DIV/0!	#DIV/0!	Core
0	0	0	0	0	0	0	0	0	0	0	0	0	0	#DIV/0!	#DIV/0!	#DIV/0!	Core
0	0	0	0	0	0	0	0	0	0	0	0	0	0	#DIV/0!	#DIV/0!	#DIV/0!	Core
0	0	0	0	0	0	0	0	0	0	0	0	0	0	#DIV/0!	#DIV/0!	#DIV/0!	Core
0	0	0	0	0	0	0	0	0	0	0	0	0	0	#DIV/0!	#DIV/0!	#DIV/0!	Core
0	0	0	0	0	0	0	0	0	0	0	0	0	0	#DIV/0!	#DIV/0!	#DIV/0!	Core
0	0	0	0	0	0	0	0	0	0	0	0	0	0	#DIV/0!	#DIV/0!	#DIV/0!	Core
0	0	0	0	0	0	0	0	0	0	0	0	0	0	#DIV/0!	#DIV/0!	#DIV/0!	Core
0	0	0	0	0	0	0	0	0	0	0	0	0	0	#DIV/0!	#DIV/0!	#DIV/0!	Core
0	0	0	0	0	0	0	0	0	0	0	0	0	0	#DIV/0!	#DIV/0!	#DIV/0!	Core
0	0	0	0	0	0	0	0	0	0	0	0	0	0	#DIV/0!	#DIV/0!	#DIV/0!	Core
0	0	0	0	0	0	0	0	0	0	0	0	0	0	#DIV/0!	#DIV/0!	#DIV/0!	Core
0	0	0	0	0	0	0	0	0	0	0	0	0	0	#DIV/0!	#DIV/0!	#DIV/0!	Core
0	0	0	0	0	0	0	0	0	0	0	0	0	0	#DIV/0!	#DIV/0!	#DIV/0!	Core
0	0	0	0	0	0	0	0	0	0	0	0	0	0	#DIV/0!	#DIV/0!	#DIV/0!	Core
0	0	0	0	0	0	0	0	0	0	0	0	0	0	#DIV/0!	#DIV/0!	#DIV/0!	Core
0	0	0	0	0	0	0	0	0	0	0	0	0	0	#DIV/0!	#DIV/0!	#DIV/0!	Core
0	0	0	0	0	0	0	0	0	0	0	0	0	0	#DIV/0!	#DIV/0!	#DIV/0!	Core
0	0	0	0	0	0	0	0	0	0	0	0	0	0	#DIV/0!	#DIV/0!	#DIV/0!	Core
0	0	0	0	0	0	0	0	0	0	0	0	0	0	#DIV/0!	#DIV/0!	#DIV/0!	Core
0	0	0	0	0	0	0	0	0	0	0	0	0	0	#DIV/0!	#DIV/0!	#DIV/0!	Core
0	0	0	0	0	0	0	0	0	0	0	0	0	0	#DIV/0!	#DIV/0!	#DIV/0!	Core
0	0	0	0	0	0	0	0	0	0	0	0	0	0	#DIV/0!	#DIV/0!	#DIV/0!	Core
0	0	0	0	0	0	0	0	0	0	0	0	0	0	#DIV/0!	#DIV/0!	#DIV/0!	Core
0	0	0	0	0	0	0	0	0	0	0	0	0	0	#DIV/0!	#DIV/0!	#DIV/0!	Core
0	0	0	0	0	0	0	0	0	0	0	0	0	0	#DIV/0!	#DIV/0!	#DIV/0!	Core
0	0	0	0	0	0	0	0	0	0	0	0	0	0	#DIV/0!	#DIV/0!	#DIV/0!	Core
0	0	0	0	0	0	0	0	0	0	0	0	0	0	#DIV/0!	#DIV/0!	#DIV/0!	Core
0	0	0	0	0	0	0	0	0	0	0	0	0	0	#DIV/0!	#DIV/0!	#DIV/0!	Core
0	0	0	0	0	0	0	0	0	0	0	0	0	0	#DIV/0!	#DIV/0!	#DIV/0!	Core
0	0	0	0	0	0	0	0	0	0	0	0	0	0	#DIV/0!	#DIV/0!	#DIV/0!	Core
0	0	0	0	0	0	0	0	0	0	0	0	0	0	#DIV/0!	#DIV/0!	#DIV/0!	Core
0	0	0	0	0	0	0	0	0	0	0	0	0	0	#DIV/0!	#DIV/0!	#DIV/0!	Core
0	0	0	0	0	0	0	0	0	0	0	0	0	0	#DIV/0!	#DIV/0!	#DIV/0!	Core
0	0	0	0	0	0	0	0	0	0	0	0	0	0	#DIV/0!	#DIV/0!	#DIV/0!	Core
0	0	0	0	0	0	0	0	0	0	0	0	0	0	#DIV/0!	#DIV/0!	#DIV/0!	Core
0	0	0	0	0	0	0	0	0	0	0	0	0	0	#DIV/0!	#DIV/0!	#DIV/0!	Core
0	0	0	0	0	0	0	0	0	0	0	0	0	0	#DIV/0!	#DIV/0!	#DIV/0!	Core
0	0	0	0	0	0	0	0	0	0	0	0	0	0	#DIV/0!	#DIV/0!	#DIV/0!	Core
0	0	0	0	0	0	0	0	0	0	0	0	0	0	#DIV/0!	#DIV/0!	#DIV/0!	Core
0	0	0	0	0	0	0	0	0	0	0	0	0	0	#DIV/0!	#DIV/0!	#DIV/0!	Core
0	0	0	0	0	0	0	0	0	0	0	0	0	0	#DIV/0!	#DIV/0!	#DIV/0!	Core
0	0	0	0	0	0	0	0	0	0	0	0	0	0	#DIV/0!	#DIV/0!	#DIV/0!	Core
0	0	0	0	0	0	0	0	0	0	0	0	0	0	#DIV/0!	#DIV/0!	#DIV/0!	Core
0	0	0	0	0	0	0	0	0	0	0	0	0	0	#DIV/0!	#DIV/0!	#DIV/0!	Core
0	0	0	0	0	0	0	0	0	0	0	0	0	0	#DIV/0!	#DIV/0!	#DIV/0!	Core
0	0	0	0	0	0	0	0	0	0	0	0	0	0	#DIV/0!	#DIV/0!	#DIV/0!	Core
0	0	0	0	0	0	0	0	0	0	0	0	0	0	#DIV/0!	#DIV/0!	#DIV/0!	Core
0	0	0	0	0	0	0	0	0	0	0	0	0	0	#DIV/0!	#DIV/0!	#DIV/0!	Core
0	0	0	0	0	0	0	0	0	0	0	0	0	0	#DIV/0!	#DIV/0!	#DIV/0!	Core
0	0	0	0	0	0	0	0	0	0	0	0	0	0	#DIV/0!	#DIV/0!	#DIV/0!	Core
0	0	0	0	0	0	0	0	0	0	0	0	0	0	#DIV/0!	#DIV/0!	#DIV/0!	Core
0	0	0	0	0	0	0	0	0	0	0	0	0	0	#DIV/0!	#DIV/0!	#DIV/0!	Core
0	0	0	0	0	0	0	0	0	0	0	0	0	0	#DIV/0!	#DIV/0!	#DIV/0!	Core
0	0	0	0	0	0	0	0	0	0	0	0	0	0	#DIV/0!	#DIV/0!	#DIV/0!	Core
0	0	0	0	0	0	0	0	0	0	0	0	0	0	#DIV/0!	#DIV/0!	#DIV/0!	Core
0	0	0	0	0	0	0	0	0	0	0	0	0	0	#DIV/0!	#DIV/0!	#DIV/0!	Core
0	0	0	0	0	0	0	0	0	0	0	0	0	0	#DIV/0!	#DIV/0!	#DIV/0!	Core
0	0	0	0	0	0	0	0	0	0	0	0	0	0	#DIV/0!	#DIV/0!	#DIV/0!	Core
0	0	0	0	0	0	0	0	0	0	0	0	0	0	#DIV/0!	#DIV/0!	#DIV/0!	Core
0	0	0	0	0	0	0	0	0	0	0	0	0	0	#DIV/0!	#DIV/0!	#DIV/0!	Core
0	0	0	0	0	0	0	0	0	0	0	0	0	0	#DIV/0!	#DIV/0!	#DIV/0!	Core
0	0	0	0	0	0	0	0	0	0	0	0	0	0	#DIV/0!	#DIV/0!	#DIV/0!	Core
0	0	0	0	0	0	0	0	0	0	0	0	0	0	#DIV/0!	#DIV/0!	#DIV/0!	Core
0	0	0	0	0	0	0	0	0	0	0	0	0	0	#DIV/0!	#DIV/0!	#DIV/0!	Core
0	0	0	0	0	0	0	0	0	0	0	0	0	0	#DIV/0!	#DIV/0!	#DIV/0!	Core
0	0	0	0	0	0	0	0	0	0	0	0	0	0	#DIV/0!	#DIV/0!	#DIV/0!	Core
0	0	0	0	0	0	0	0	0	0	0	0	0	0	#DIV/0!	#DIV/0!	#DIV/0!	Core
0	0	0	0	0	0	0	0	0	0	0	0	0	0	#DIV/0!	#DIV/0!	#DIV/0!	Core
0	0	0	0	0	0	0	0	0	0	0	0	0	0	#DIV/0!	#DIV/0!	#DIV/0!	Core
0	0	0	0	0	0	0	0	0	0	0	0	0	0	#DIV/0!	#DIV/0!	#DIV/0!	Core
0	0	0	0	0	0	0	0	0	0	0	0	0	0	#DIV/0!	#DIV/0!	#DIV/0!	Core
0	0	0	0	0	0	0	0	0	0	0	0	0	0	#DIV/0!	#DIV/0!	#DIV/0!	Core
0	0	0	0	0	0	0	0	0	0	0	0	0	0	#DIV/0!	#DIV/0!	#DIV/0!	Core
0	0	0	0	0	0	0	0	0	0	0	0	0	0	#DIV/0!	#DIV/0!	#DIV/0!	Core
0	0	0	0	0	0	0	0	0	0	0	0	0	0	#DIV/0!	#DIV/0!	#DIV/0!	Core
0	0	0	0	0	0	0	0	0	0	0	0	0	0	#DIV/0!	#DIV/0!	#DIV/0!	Core
0	0	0	0	0	0	0	0	0	0	0	0	0	0	#DIV/0!	#DIV/0!	#DIV/0!	Core
0	0	0	0	0	0	0	0	0	0	0	0	0	0	#DIV/0!	#DIV/0!	#DIV/0!	Core
0	0	0	0	0	0	0	0	0	0	0	0	0	0	#DIV/0!	#DIV/0!	#DIV/0!	Core
0	0	0	0	0	0	0	0	0	0	0	0	0	0	#DIV/0!	#DIV/0!	#DIV/0!	Core
0	0	0	0	0	0	0	0	0	0	0	0	0	0	#DIV/0!	#DIV/0!	#DIV/0!	Core
0	0	0	0	0	0	0	0	0	0	0	0	0	0	#DIV/0!	#DIV/0!	#DIV/0!	Core
0	0	0	0	0	0	0	0	0	0	0	0	0	0	#DIV/0!	#DIV/0!	#DIV/0!	Core
0	0	0	0	0	0	0	0	0	0	0	0	0	0	#DIV/0!	#DIV/0!	#DIV/0!	Core
0	0	0	0	0	0	0	0	0	0	0	0	0	0	#DIV/0!	#DIV/0!	#DIV/0!	Core
0	0	0	0	0	0	0	0	0	0	0	0	0	0	#DIV/0!	#DIV/0!	#DIV/0!	Core
0	0	0	0	0	0	0	0	0	0	0	0	0	0	#DIV/0!	#DIV/0!	#DIV/0!	Core
0	0	0	0	0	0	0	0	0	0	0	0	0	0	#DIV/0!	#DIV/0!	#DIV/0!	Core
0	0	0	0	0	0	0	0	0	0	0	0	0	0	#DIV/0!	#DIV/0!	#DIV/0!	Core
0	0	0	0	0	0	0	0	0	0	0	0	0	0	#DIV/0!	#DIV/0!	#DIV/0!	Core
0	0	0	0	0	0	0	0	0	0	0	0	0	0	#DIV/0!	#DIV/0!	#DIV/0!	Core
0	0	0	0	0	0	0	0	0	0	0	0	0	0	#DIV/0!	#DIV/0!	#DIV/0!	Core
0	0	0	0	0	0	0	0	0	0	0	0	0	0	#DIV/0!	#DIV/0!	#DIV/0!	Core
0	0	0	0	0	0	0	0	0	0	0	0	0	0	#DIV/0!	#DIV/0!	#DIV/0!	Core
0	0	0	0	0	0	0	0	0	0	0	0	0	0	#DIV/0!	#DIV/0!	#DIV/0!	Core
0	0	0	0	0	0	0	0	0	0	0	0	0	0	#DIV/0!	#DIV/0!	#DIV/0!	Core
0	0	0	0	0	0	0	0	0	0	0	0	0	0	#DIV/0!	#DIV/0!	#DIV/0!	Core
0	0	0	0	0	0	0	0	0	0	0	0	0	0	#DIV/0!	#DIV/0!	#DIV/0!	Core
0	0	0	0	0	0	0	0	0	0	0	0	0	0	#DIV/0!	#DIV/0!	#DIV/0!	Core
0	0	0	0	0	0	0	0	0	0	0	0	0	0	#DIV/0!	#DIV/0!	#DIV/0!	Core
0	0	0	0	0	0	0	0	0	0	0	0	0	0	#DIV/0!	#DIV/0!	#DIV/0!	Core
0	0	0	0	0	0	0	0	0	0	0	0	0	0	#DIV/0!	#DIV/0!	#DIV/0!	Core
0	0	0	0	0	0	0	0	0	0	0	0	0	0	#DIV/0!	#DIV/0!	#DIV/0!	Core
0	0	0	0	0	0	0	0	0	0	0	0	0	0	#DIV/0!	#DIV/0!	#DIV/0!	Core
0	0	0	0	0	0	0	0	0	0	0	0	0	0	#DIV/0!	#DIV/0!	#DIV/0!	Core
0	0	0	0	0	0	0	0	0	0	0	0	0	0	#DIV/0!	#DIV/0!	#DIV/0!	Core
0	0	0	0	0	0	0	0	0	0	0	0	0	0	#DIV/0!	#DIV/0!	#DIV/0!	Core
0	0	0	0	0	0	0	0	0	0	0	0	0	0	#DIV/0!	#DIV/0!	#DIV/0!	Core
0	0	0	0	0	0	0	0	0	0	0	0	0	0	#DIV/0!	#DIV/0!	#DIV/0!	Core
0	0	0	0	0	0	0	0	0	0	0	0	0	0	#DIV/0!	#DIV/0!	#DIV/0!	Core
0	0	0	0	0	0	0	0	0	0	0	0	0	0	#DIV/0!	#DIV/0!	#DIV/0!	Core
0	0	0	0	0	0	0	0	0	0	0	0	0	0	#DIV/0!	#DIV/0!	#DIV/0!	Core
0	0	0	0	0	0	0	0	0	0	0	0	0	0	#DIV/0!	#DIV/0!	#DIV/0!	Core
0	0	0	0	0	0	0	0	0	0	0	0	0	0	#DIV/0!	#DIV/0!	#DIV/0!	Core
0	0	0	0	0	0	0	0	0	0	0	0	0	0	#DIV/0!	#DIV/0!	#DIV/0!	Core
0	0	0	0	0	0	0	0	0	0	0	0	0	0	#DIV/0!	#DIV/0!	#DIV/0!	Core
0	0	0	0	0	0	0	0	0	0	0	0	0	0	#DIV/0!	#DIV/0!	#DIV/0!	Core
0	0	0	0	0	0	0	0	0	0	0	0	0	0	#DIV/0!	#DIV/0!	#DIV/0!	Core
0	0	0	0	0	0	0	0	0	0	0	0	0	0	#DIV/0!	#DIV/0!	#DIV/0!	Core
0	0	0	0	0	0	0	0	0	0	0	0	0	0	#DIV/0!	#DIV/0!	#DIV/0!	Core
0	0	0	0	0	0	0	0	0	0	0	0	0	0	#DIV/0!	#DIV/0!	#DIV/0!	Core
0	0	0	0	0	0	0	0	0	0	0	0	0	0	#DIV/0!	#DIV/0!	#DIV/0!	Core
0	0	0	0	0	0	0	0	0	0	0	0	0	0	#DIV/0!	#DIV/0!	#DIV/0!	Core
0	0	0	0	0	0	0	0	0	0	0	0	0	0	#DIV/0!	#DIV/0!	#DIV/0!	Core
0	0	0	0	0	0	0	0	0	0	0	0	0	0	#DIV/0!	#DIV/0!	#DIV/0!	Core
0	0	0	0	0	0	0	0	0	0	0	0	0	0	#DIV/0!	#DIV/0!	#DIV/0!	Core
0	0	0	0	0	0	0	0	0	0	0	0	0	0	#DIV/0!	#DIV/0!	#DIV/0!	Core
0	0	0	0	0	0	0	0	0	0	0	0	0	0	#DIV/0!	#DIV/0!	#DIV/0!	Core
0	0	0	0	0	0	0	0	0	0	0	0	0	0	#DIV/0!	#DIV/0!	#DIV/0!	Core
0	0	0	0	0	0	0	0	0	0	0	0	0	0	#DIV/0!	#DIV/0!	#DIV/0!	Core
0	0	0	0	0	0	0	0	0	0	0	0	0	0	#DIV/0!	#DIV/0!	#DIV/0!	Core
0	0	0	0	0	0	0	0	0	0	0	0	0	0	#DIV/0!	#DIV/0!	#DIV/0!	Core
0	0	0	0	0	0	0	0	0	0	0	0	0	0	#DIV/0!	#DIV/0!	#DIV/0!	Core
0	0	0	0	0	0	0	0	0	0	0	0	0	0	#DIV/0!	#DIV/0!	#DIV/0!	Core
0	0	0	0	0	0	0	0	0	0	0	0	0	0	#DIV/0!	#DIV/0!	#DIV/0!	Core
0	0	0	0	0	0	0	0	0	0	0	0	0	0	#DIV/0!	#DIV/0!	#DIV/0!	Core
0	0	0	0	0	0	0	0	0	0	0	0	0	0	#DIV/0!	#DIV/0!	#DIV/0!	Core
0	0	0	0	0	0	0	0	0	0	0	0	0	0	#DIV/0!	#DIV/0!	#DIV/0!	Core
0	0	0	0	0	0	0	0	0	0	0	0	0	0	#DIV/0!	#DIV/0!	#DIV/0!	Core
0	0	0	0	0	0	0	0	0	0	0	0	0	0	#DIV/0!	#DIV/0!	#DIV/0!	Core
0	0	0	0	0	0	0	0	0	0	0	0	0	0	#DIV/0!	#DIV/0!	#DIV/0!	Core
0	0	0	0	0	0	0	0	0	0	0	0	0	0	#DIV/0!	#DIV/0!	#DIV/0!	Core
0	0	0	0	0	0	0	0	0	0	0	0	0	0	#DIV/0!	#DIV/0!	#DIV/0!	Core
0	0	0	0	0	0	0	0	0	0	0	0	0	0	#DIV/0!	#DIV/0!	#DIV/0!	Core
0	0	0	0	0	0	0	0	0	0	0	0	0	0	#DIV/0!	#DIV/0!	#DIV/0!	Core
0	0	0	0	0	0	0	0	0	0	0	0	0	0	#DIV/0!	#DIV/0!	#DIV/0!	Core
0	0	0	0	0	0	0	0	0	0	0	0	0	0	#DIV/0!	#DIV/0!	#DIV/0!	Core
0	0	0	0	0	0	0	0	0	0	0	0	0	0	#DIV/0!	#DIV/0!	#DIV/0!	Core
0	0	0	0	0	0	0	0	0	0	0	0	0	0	#DIV/0!	#DIV/0!	#DIV/0!	Core
0	0	0	0	0	0	0	0	0	0	0	0	0	0	#DIV/0!	#DIV/0!	#DIV/0!	Core
0	0	0	0	0	0	0	0	0	0	0	0	0	0	#DIV/0!	#DIV/0!	#DIV/0!	Core
0	0	0	0	0	0	0	0	0	0	0	0	0	0	#DIV/0!	#DIV/0!	#DIV/0!	Core
0	0	0	0	0	0	0	0	0	0	0	0	0	0	#DIV/0!	#DIV/0!	#DIV/0!	Core
0	0	0	0	0	0	0	0	0	0	0	0	0	0	#DIV/0!	#DIV/0!	#DIV/0!	Core
0	0	0	0	0	0	0	0	0	0	0	0	0	0	#DIV/0!	#DIV/0!	#DIV/0!	Core
0	0	0	0	0	0	0	0	0	0	0	0	0	0	#DIV/0!	#DIV/0!	#DIV/0!	Core
0	0	0	0	0	0	0	0	0	0	0	0	0	0	#DIV/0!	#DIV/0!	#DIV/0!	Core
0	0	0	0	0	0	0	0	0	0	0	0	0	0	#DIV/0!	#DIV/0!	#DIV/0!	Core
0	0	0	0	0	0	0	0	0	0	0	0	0	0	#DIV/0!	#DIV/0!	#DIV/0!	Core
0	0	0	0	0	0	0	0	0	0	0	0	0	0	#DIV/0!	#DIV/0!	#DIV/0!	Core
0	0	0	0	0	0	0	0	0	0	0	0	0	0	#DIV/0!	#DIV/0!	#DIV/0!	Core
0	0	0	0	0	0	0	0	0	0	0	0	0	0	#DIV/0!	#DIV/0!	#DIV/0!	Core
0	0	0	0	0	0	0	0	0	0	0	0	0	0	#DIV/0!	#DIV/0!	#DIV/0!	Core
0	0	0	0	0	0	0	0	0	0	0	0	0	0	#DIV/0!	#DIV/0!	#DIV/0!	Core
0	0	0	0	0	0	0	0	0	0	0	0	0	0	#DIV/0!	#DIV/0!	#DIV/0!	Core
0	0	0	0	0	0	0	0	0	0	0	0	0	0	#DIV/0!	#DIV/0!	#DIV/0!	Core
0	0	0	0	0	0	0	0	0	0	0	0	0	0	#DIV/0!	#DIV/0!	#DIV/0!	Core
0	0	0	0	0	0	0	0	0	0	0	0	0	0	#DIV/0!	#DIV/0!	#DIV/0!	Core
0	0	0	0	0	0	0	0	0	0	0	0	0	0	#DIV/0!	#DIV/0!	#DIV/0!	Core
0	0	0	0	0	0	0	0	0	0	0	0	0	0	#DIV/0!	#DIV/0!	#DIV/0!	Core
0	0	0	0	0	0	0	0	0	0	0	0	0	0	#DIV/0!	#DIV/0!	#DIV/0!	Core
0	0	0	0	0	0	0	0	0	0	0	0	0	0	#DIV/0!	#DIV/0!	#DIV/0!	Core
0	0	0	0	0	0	0	0	0	0	0	0	0	0	#DIV/0!	#DIV/0!	#DIV/0!	Core
0	0	0	0	0	0	0	0	0	0	0	0	0	0	#DIV/0!	#DIV/0!	#DIV/0!	Core
0	0	0	0	0	0	0	0	0	0	0	0	0	0	#DIV/0!	#DIV/0!	#DIV/0!	Core
0	0	0	0	0	0	0	0	0	0	0	0	0	0	#DIV/0!	#DIV/0!	#DIV/0!	Core
0	0	0	0	0	0	0	0	0	0	0	0	0	0	#DIV/0!	#DIV/0!	#DIV/0!	Core
0	0	0	0	0	0	0	0	0	0	0	0	0	0	#DIV/0!	#DIV/0!	#DIV/0!	Core
0	0	0	0	0	0	0	0	0	0	0	0	0	0	#DIV/0!	#DIV/0!	#DIV/0!	Core
0	0	0	0	0	0	0	0	0	0	0	0	0	0	#DIV/0!	#DIV/0!	#DIV/0!	Core
0	0	0	0	0	0	0	0	0	0	0	0	0	0	#DIV/0!	#DIV/0!	#DIV/0!	Core
0	0	0	0	0	0	0	0	0	0	0	0	0	0	#DIV/0!	#DIV/0!	#DIV/0!	Core
0	0	0	0	0	0	0	0	0	0	0	0	0	0	#DIV/0!	#DIV/0!	#DIV/0!	Core
0	0	0	0	0	0	0	0	0	0	0	0	0	0	#DIV/0!	#DIV/0!	#DIV/0!	Core
0	0	0	0	0	0	0	0	0	0	0	0	0	0	#DIV/0!	#DIV/0!	#DIV/0!	Core
0	0	0	0	0	0	0	0	0	0	0	0	0	0	#DIV/0!	#DIV/0!	#DIV/0!	Core
0	0	0	0	0	0	0	0	0	0	0	0	0	0	#DIV/0!	#DIV/0!	#DIV/0!	Core
0	0	0	0	0	0	0	0	0	0	0	0	0	0	#DIV/0!	#DIV/0!	#DIV/0!	Core
0	0	0	0	0	0	0	0	0	0	0	0	0	0	#DIV/0!	#DIV/0!	#DIV/0!	Core
0	0	0	0	0	0	0	0	0	0	0	0	0	0	#DIV/0!	#DIV/0!	#DIV/0!	Core
0	0	0	0	0	0	0	0	0	0	0	0	0	0	#DIV/0!	#DIV/0!	#DIV/0!	Core
0	0	0	0	0	0	0	0	0	0	0	0	0	0	#DIV/0!	#DIV/0!	#DIV/0!	Core
0	0	0	0	0	0	0	0	0	0	0	0	0	0	#DIV/0!	#DIV/0!	#DIV/0!	Core
0	0	0	0	0	0	0	0	0	0	0	0	0	0	#DIV/0!	#DIV/0!	#DIV/0!	Core
0	0	0	0	0	0	0	0	0	0	0	0	0	0	#DIV/0!	#DIV/0!	#DIV/0!	Core
0	0	0	0	0	0	0	0	0	0	0	0	0	0	#DIV/0!	#DIV/0!	#DIV/0!	Core
0	0	0	0	0	0	0	0	0	0	0	0	0	0	#DIV/0!	#DIV/0!	#DIV/0!	Core
0	0	0	0	0	0	0	0	0	0	0	0	0	0	#DIV/0!	#DIV/0!	#DIV/0!	Core
0	0	0	0	0	0	0	0	0	0	0	0	0	0	#DIV/0!	#DIV/0!	#DIV/0!	Core
0	0	0	0	0	0	0	0	0	0	0	0	0	0	#DIV/0!	#DIV/0!	#DIV/0!	Core
0	0	0	0	0	0	0	0	0	0	0	0	0	0	#DIV/0!	#DIV/0!	#DIV/0!	Core
0	0	0	0	0	0	0	0	0	0	0	0	0	0	#DIV/0!	#DIV/0!	#DIV/0!	Core
0	0	0	0	0	0	0	0	0	0	0	0	0	0	#DIV/0!	#DIV/0!	#DIV/0!	Core
0	0	0	0	0	0	0	0	0	0	0	0	0	0	#DIV/0!	#DIV/0!	#DIV/0!	Core
0	0	0	0	0	0	0	0	0	0	0	0	0	0	#DIV/0!	#DIV/0!	#DIV/0!	Core
0	0	0	0	0	0	0	0	0	0	0	0	0	0	#DIV/0!	#DIV/0!	#DIV/0!	Core
0	0	0	0	0	0	0	0	0	0	0	0	0	0	#DIV/0!	#DIV/0!	#DIV/0!	Core
0	0	0	0	0	0	0	0	0	0	0	0	0	0	#DIV/0!	#DIV/0!	#DIV/0!	Core
0	0	0	0	0	0	0	0	0	0	0	0	0	0	#DIV/0!	#DIV/0!	#DIV/0!	Core
0	0	0	0	0	0	0	0	0	0	0	0	0	0	#DIV/0!	#DIV/0!	#DIV/0!	Core
0	0	0	0	0	0	0	0	0	0	0	0	0	0	#DIV/0!	#DIV/0!	#DIV/0!	Core
0	0	0	0	0	0	0	0	0	0	0	0	0	0	#DIV/0!	#DIV/0!	#DIV/0!	Core
0	0	0	0	0	0	0	0	0	0	0	0	0	0	#DIV/0!	#DIV/0!	#DIV/0!	Core
0	0	0	0	0	0	0	0	0	0	0	0	0	0	#DIV/0!	#DIV/0!	#DIV/0!	Core
0	0	0	0	0	0	0	0	0	0	0	0	0	0	#DIV/0!	#DIV/0!	#DIV/0!	Core
0	0	0	0	0	0	0	0	0	0	0	0	0	0	#DIV/0!	#DIV/0!	#DIV/0!	Core
0	0	0	0	0	0	0	0	0	0	0	0	0	0	#DIV/0!	#DIV/0!	#DIV/0!	Core
0	0	0	0	0	0	0	0	0	0	0	0	0	0	#DIV/0!	#DIV/0!	#DIV/0!	Core
0	0	0	0	0	0	0	0	0	0	0	0	0	0	#DIV/0!	#DIV/0!	#DIV/0!	Core
0	0	0	0	0	0	0	0	0	0	0	0	0	0	#DIV/0!	#DIV/0!	#DIV/0!	Core
0	0	0	0	0	0	0	0	0	0	0	0	0	0	#DIV/0!	#DIV/0!	#DIV/0!	Core
0	0	0	0	0	0	0	0	0	0	0	0	0	0	#DIV/0!	#DIV/0!	#DIV/0!	Core
0	0	0	0	0	0	0	0	0	0	0	0	0	0	#DIV/0!	#DIV/0!	#DIV/0!	Core
0	0	0	0	0	0	0	0	0	0	0	0	0	0	#DIV/0!	#DIV/0!	#DIV/0!	Core
0	0	0	0	0	0	0	0	0	0	0	0	0	0	#DIV/0!	#DIV/0!	#DIV/0!	Core
0	0	0	0	0	0	0	0	0	0	0	0	0	0	#DIV/0!	#DIV/0!	#DIV/0!	Core
0	0	0	0	0	0	0	0	0	0	0	0	0	0	#DIV/0!	#DIV/0!	#DIV/0!	Core
0	0	0	0	0	0	0	0	0	0	0	0	0	0	#DIV/0!	#DIV/0!	#DIV/0!	Core
0	0	0	0	0	0	0	0	0	0	0	0	0	0	#DIV/0!	#DIV/0!	#DIV/0!	Core
0	0	0	0	0	0	0	0	0	0	0	0	0	0	#DIV/0!	#DIV/0!	#DIV/0!	Core
0	0	0	0	0	0	0	0	0	0	0	0	0	0	#DIV/0!	#DIV/0!	#DIV/0!	Core
0	0	0	0	0	0	0	0	0	0	0	0	0	0	#DIV/0!	#DIV/0!	#DIV/0!	Core
0	0	0	0	0	0	0	0	0	0	0	0	0	0	#DIV/0!	#DIV/0!	#DIV/0!	Core
0	0	0	0	0	0	0	0	0	0	0	0	0	0	#DIV/0!	#DIV/0!	#DIV/0!	Core
0	0	0	0	0	0	0	0	0	0	0	0	0	0	#DIV/0!	#DIV/0!	#DIV/0!	Core
0	0	0	0	0	0	0	0	0	0	0	0	0	0	#DIV/0!	#DIV/0!	#DIV/0!	Core
0	0	0	0	0	0	0	0	0	0	0	0	0	0	#DIV/0!	#DIV/0!	#DIV/0!	Core
0	0	0	0	0	0	0	0	0	0	0	0	0	0	#DIV/0!	#DIV/0!	#DIV/0!	Core
0	0	0	0	0	0	0	0	0	0	0	0	0	0	#DIV/0!	#DIV/0!	#DIV/0!	Core
0	0	0	0	0	0	0	0	0	0	0	0	0	0	#DIV/0!	#DIV/0!	#DIV/0!	Core
0	0	0	0	0	0	0	0	0	0	0	0	0	0	#DIV/0!	#DIV/0!	#DIV/0!	Core
0	0	0	0	0	0	0	0	0	0	0	0	0	0	#DIV/0!	#DIV/0!	#DIV/0!	Core
0	0	0	0	0	0	0	0	0	0	0	0	0	0	#DIV/0!	#DIV/0!	#DIV/0!	Core
0	0	0	0	0	0	0	0	0	0	0	0	0	0	#DIV/0!	#DIV/0!	#DIV/0!	Core
0	0	0	0	0	0	0	0	0	0	0	0	0	0	#DIV/0!	#DIV/0!	#DIV/0!	Core
0	0	0	0	0	0	0	0	0	0	0	0	0	0	#DIV/0!	#DIV/0!	#DIV/0!	Core
0	0	0	0	0	0	0	0	0	0	0	0	0	0	#DIV/0!	#DIV/0!	#DIV/0!	Core
0	0	0	0	0	0	0	0	0	0	0	0	0	0	#DIV/0!	#DIV/0!	#DIV/0!	Core
0	0	0	0	0	0	0	0	0	0	0	0	0	0	#DIV/0!	#DIV/0!	#DIV/0!	Core
0	0	0	0	0	0	0	0	0	0	0	0	0	0	#DIV/0!	#DIV/0!	#DIV/0!	Core
0	0	0	0	0	0	0	0	0	0	0	0	0	0	#DIV/0!	#DIV/0!	#DIV/0!	Core
0	0	0	0	0	0	0	0	0	0	0	0	0	0	#DIV/0!	#DIV/0!	#DIV/0!	Core
0	0	0	0	0	0	0	0	0	0	0	0	0	0	#DIV/0!	#DIV/0!	#DIV/0!	Core
0	0	0	0	0	0	0	0	0	0	0	0	0	0	#DIV/0!	#DIV/0!	#DIV/0!	Core
0	0	0	0	0	0	0	0	0	0	0	0	0	0	#DIV/0!	#DIV/0!	#DIV/0!	Core
0	0	0	0	0	0	0	0	0	0	0	0	0	0	#DIV/0!	#DIV/0!	#DIV/0!	Core
0	0	0	0	0	0	0	0	0	0	0	0	0	0	#DIV/0!	#DIV/0!	#DIV/0!	Core
0	0	0	0	0	0	0	0	0	0	0	0	0	0	#DIV/0!	#DIV/0!	#DIV/0!	Core
0	0	0	0	0	0	0	0	0	0	0	0	0	0	#DIV/0!	#DIV/0!	#DIV/0!	Core
0	0	0	0	0	0	0	0	0	0	0	0	0	0	#DIV/0!	#DIV/0!	#DIV/0!	Core
0	0	0	0	0	0	0	0	0	0	0	0	0	0	#DIV/0!	#DIV/0!	#DIV/0!	Core
0	0	0	0	0	0	0	0	0	0	0	0	0	0	#DIV/0!	#DIV/0!	#DIV/0!	Core
0	0	0	0	0	0	0	0	0	0	0	0	0	0	#DIV/0!	#DIV/0!	#DIV/0!	Core
0	0	0	0	0	0	0	0	0	0	0	0	0	0	#DIV/0!	#DIV/0!	#DIV/0!	Core
0	0	0	0	0	0	0	0	0	0	0	0	0	0	#DIV/0!	#DIV/0!	#DIV/0!	Core
0	0	0	0	0	0	0	0	0	0	0	0	0	0	#DIV/0!	#DIV/0!	#DIV/0!	Core
0	0	0	0	0	0	0	0	0	0	0	0	0	0	#DIV/0!	#DIV/0!	#DIV/0!	Core
0	0	0	0	0	0	0	0	0	0	0	0	0	0	#DIV/0!	#DIV/0!	#DIV/0!	Core
0	0	0	0	0	0	0	0	0	0	0	0	0	0	#DIV/0!	#DIV/0!	#DIV/0!	Core
0	0	0	0	0	0	0	0	0	0	0	0	0	0	#DIV/0!	#DIV/0!	#DIV/0!	Core
0	0	0	0	0	0	0	0	0	0	0	0	0	0	#DIV/0!	#DIV/0!	#DIV/0!	Core
0	0	0	0	0	0	0	0	0	0	0	0	0	0	#DIV/0!	#DIV/0!	#DIV/0!	Core
0	0	0	0	0	0	0	0	0	0	0	0	0	0	#DIV/0!	#DIV/0!	#DIV/0!	Core
0	0	0	0	0	0	0	0	0	0	0	0	0	0	#DIV/0!	#DIV/0!	#DIV/0!	Core
0	0	0	0	0	0	0	0	0	0	0	0	0	0	#DIV/0!	#DIV/0!	#DIV/0!	Core
0	0	0	0	0	0	0	0	0	0	0	0	0	0	#DIV/0!	#DIV/0!	#DIV/0!	Core
0	0	0	0	0	0	0	0	0	0	0	0	0	0	#DIV/0!	#DIV/0!	#DIV/0!	Core
0	0	0	0	0	0	0	0	0	0	0	0	0	0	#DIV/0!	#DIV/0!	#DIV/0!	Core
0	0	0	0	0	0	0	0	0	0	0	0	0	0	#DIV/0!	#DIV/0!	#DIV/0!	Core
0	0	0	0	0	0	0	0	0	0	0	0	0	0	#DIV/0!	#DIV/0!	#DIV/0!	Core
0	0	0	0	0	0	0	0	0	0	0	0	0	0	#DIV/0!	#DIV/0!	#DIV/0!	Core
0	0	0	0	0	0	0	0	0	0	0	0	0	0	#DIV/0!	#DIV/0!	#DIV/0!	Core
0	0	0	0	0	0	0	0	0	0	0	0	0	0	#DIV/0!	#DIV/0!	#DIV/0!	Core
0	0	0	0	0	0	0	0	0	0	0	0	0	0	#DIV/0!	#DIV/0!	#DIV/0!	Core
0	0	0	0	0	0	0	0	0	0	0	0	0	0	#DIV/0!	#DIV/0!	#DIV/0!	Core
0	0	0	0	0	0	0	0	0	0	0	0	0	0	#DIV/0!	#DIV/0!	#DIV/0!	Core
0	0	0	0	0	0	0	0	0	0	0	0	0	0	#DIV/0!	#DIV/0!	#DIV/0!	Core
0	0	0	0	0	0	0	0	0	0	0	0	0	0	#DIV/0!	#DIV/0!	#DIV/0!	Core
0	0	0	0	0	0	0	0	0	0	0	0	0	0	#DIV/0!	#DIV/0!	#DIV/0!	Core
0	0	0	0	0	0	0	0	0	0	0	0	0	0	#DIV/0!	#DIV/0!	#DIV/0!	Core
0	0	0	0	0	0	0	0	0	0	0	0	0	0	#DIV/0!	#DIV/0!	#DIV/0!	Core
0	0	0	0	0	0	0	0	0	0	0	0	0	0	#DIV/0!	#DIV/0!	#DIV/0!	Core
0	0	0	0	0	0	0	0	0	0	0	0	0	0	#DIV/0!	#DIV/0!	#DIV/0!	Core
0	0	0	0	0	0	0	0	0	0	0	0	0	0	#DIV/0!	#DIV/0!	#DIV/0!	Core
0	0	0	0	0	0	0	0	0	0	0	0	0	0	#DIV/0!	#DIV/0!	#DIV/0!	Core
0	0	0	0	0	0	0	0	0	0	0	0	0	0	#DIV/0!	#DIV/0!	#DIV/0!	Core
0	0	0	0	0	0	0	0	0	0	0	0	0	0	#DIV/0!	#DIV/0!	#DIV/0!	Core
0	0	0	0	0	0	0	0	0	0	0	0	0	0	#DIV/0!	#DIV/0!	#DIV/0!	Core
0	0	0	0	0	0	0	0	0	0	0	0	0	0	#DIV/0!	#DIV/0!	#DIV/0!	Core
0	0	0	0	0	0	0	0	0	0	0	0	0	0	#DIV/0!	#DIV/0!	#DIV/0!	Core
0	0	0	0	0	0	0	0	0	0	0	0	0	0	#DIV/0!	#DIV/0!	#DIV/0!	Core
0	0	0	0	0	0	0	0	0	0	0	0	0	0	#DIV/0!	#DIV/0!	#DIV/0!	Core
0	0	0	0	0	0	0	0	0	0	0	0	0	0	#DIV/0!	#DIV/0!	#DIV/0!	Core
0	0	0	0	0	0	0	0	0	0	0	0	0	0	#DIV/0!	#DIV/0!	#DIV/0!	Core
0	0	0	0	0	0	0	0	0	0	0	0	0	0	#DIV/0!	#DIV/0!	#DIV/0!	Core
0	0	0	0	0	0	0	0	0	0	0	0	0	0	#DIV/0!	#DIV/0!	#DIV/0!	Core
0	0	0	0	0	0	0	0	0	0	0	0	0	0	#DIV/0!	#DIV/0!	#DIV/0!	Core
0	0	0	0	0	0	0	0	0	0	0	0	0	0	#DIV/0!	#DIV/0!	#DIV/0!	Core
0	0	0	0	0	0	0	0	0	0	0	0	0	0	#DIV/0!	#DIV/0!	#DIV/0!	Core
0	0	0	0	0	0	0	0	0	0	0	0	0	0	#DIV/0!	#DIV/0!	#DIV/0!	Core
0	0	0	0	0	0	0	0	0	0	0	0	0	0	#DIV/0!	#DIV/0!	#DIV/0!	Core
0	0	0	0	0	0	0	0	0	0	0	0	0	0	#DIV/0!	#DIV/0!	#DIV/0!	Core
0	0	0	0	0	0	0	0	0	0	0	0	0	0	#DIV/0!	#DIV/0!	#DIV/0!	Core
0	0	0	0	0	0	0	0	0	0	0	0	0	0	#DIV/0!	#DIV/0!	#DIV/0!	Core
0	0	0	0	0	0	0	0	0	0	0	0	0	0	#DIV/0!	#DIV/0!	#DIV/0!	Core
0	0	0	0	0	0	0	0	0	0	0	0	0	0	#DIV/0!	#DIV/0!	#DIV/0!	Core
0	0	0	0	0	0	0	0	0	0	0	0	0	0	#DIV/0!	#DIV/0!	#DIV/0!	Core
0	0	0	0	0	0	0	0	0	0	0	0	0	0	#DIV/0!	#DIV/0!	#DIV/0!	Core
0	0	0	0	0	0	0	0	0	0	0	0	0	0	#DIV/0!	#DIV/0!	#DIV/0!	Core
0	0	0	0	0	0	0	0	0	0	0	0	0	0	#DIV/0!	#DIV/0!	#DIV/0!	Core
0	0	0	0	0	0	0	0	0	0	0	0	0	0	#DIV/0!	#DIV/0!	#DIV/0!	Core
0	0	0	0	0	0	0	0	0	0	0	0	0	0	#DIV/0!	#DIV/0!	#DIV/0!	Core
0	0	0	0	0	0	0	0	0	0	0	0	0	0	#DIV/0!	#DIV/0!	#DIV/0!	Core
0	0	0	0	0	0	0	0	0	0	0	0	0	0	#DIV/0!	#DIV/0!	#DIV/0!	Core
0	0	0	0	0	0	0	0	0	0	0	0	0	0	#DIV/0!	#DIV/0!	#DIV/0!	Core
0	0	0	0	0	0	0	0	0	0	0	0	0	0	#DIV/0!	#DIV/0!	#DIV/0!	Core
0	0	0	0	0	0	0	0	0	0	0	0	0	0	#DIV/0!	#DIV/0!	#DIV/0!	Core
0	0	0	0	0	0	0	0	0	0	0	0	0	0	#DIV/0!	#DIV/0!	#DIV/0!	Core
0	0	0	0	0	0	0	0	0	0	0	0	0	0	#DIV/0!	#DIV/0!	#DIV/0!	Core
0	0	0	0	0	0	0	0	0	0	0	0	0	0	#DIV/0!	#DIV/0!	#DIV/0!	Core
0	0	0	0	0	0	0	0	0	0	0	0	0	0	#DIV/0!	#DIV/0!	#DIV/0!	Core
0	0	0	0	0	0	0	0	0	0	0	0	0	0	#DIV/0!	#DIV/0!	#DIV/0!	Core
0	0	0	0	0	0	0	0	0	0	0	0	0	0	#DIV/0!	#DIV/0!	#DIV/0!	Core
0	0	0	0	0	0	0	0	0	0	0	0	0	0	#DIV/0!	#DIV/0!	#DIV/0!	Core
0	0	0	0	0	0	0	0	0	0	0	0	0	0	#DIV/0!	#DIV/0!	#DIV/0!	Core
0	0	0	0	0	0	0	0	0	0	0	0	0	0	#DIV/0!	#DIV/0!	#DIV/0!	Core
0	0	0	0	0	0	0	0	0	0	0	0	0	0	#DIV/0!	#DIV/0!	#DIV/0!	Core
0	0	0	0	0	0	0	0	0	0	0	0	0	0	#DIV/0!	#DIV/0!	#DIV/0!	Core
0	0	0	0	0	0	0	0	0	0	0	0	0	0	#DIV/0!	#DIV/0!	#DIV/0!	Core
0	0	0	0	0	0	0	0	0	0	0	0	0	0	#DIV/0!	#DIV/0!	#DIV/0!	Core
0	0	0	0	0	0	0	0	0	0	0	0	0	0	#DIV/0!	#DIV/0!	#DIV/0!	Core
0	0	0	0	0	0	0	0	0	0	0	0	0	0	#DIV/0!	#DIV/0!	#DIV/0!	Core
0	0	0	0	0	0	0	0	0	0	0	0	0	0	#DIV/0!	#DIV/0!	#DIV/0!	Core
0	0	0	0	0	0	0	0	0	0	0	0	0	0	#DIV/0!	#DIV/0!	#DIV/0!	Core
0	0	0	0	0	0	0	0	0	0	0	0	0	0	#DIV/0!	#DIV/0!	#DIV/0!	Core
0	0	0	0	0	0	0	0	0	0	0	0	0	0	#DIV/0!	#DIV/0!	#DIV/0!	Core
0	0	0	0	0	0	0	0	0	0	0	0	0	0	#DIV/0!	#DIV/0!	#DIV/0!	Core
0	0	0	0	0	0	0	0	0	0	0	0	0	0	#DIV/0!	#DIV/0!	#DIV/0!	Core
0	0	0	0	0	0	0	0	0	0	0	0	0	0	#DIV/0!	#DIV/0!	#DIV/0!	Core
0	0	0	0	0	0	0	0	0	0	0	0	0	0	#DIV/0!	#DIV/0!	#DIV/0!	Core
0	0	0	0	0	0	0	0	0	0	0	0	0	0	#DIV/0!	#DIV/0!	#DIV/0!	Core
0	0	0	0	0	0	0	0	0	0	0	0	0	0	#DIV/0!	#DIV/0!	#DIV/0!	Core
0	0	0	0	0	0	0	0	0	0	0	0	0	0	#DIV/0!	#DIV/0!	#DIV/0!	Core
0	0	0	0	0	0	0	0	0	0	0	0	0	0	#DIV/0!	#DIV/0!	#DIV/0!	Core
0	0	0	0	0	0	0	0	0	0	0	0	0	0	#DIV/0!	#DIV/0!	#DIV/0!	Core
0	0	0	0	0	0	0	0	0	0	0	0	0	0	#DIV/0!	#DIV/0!	#DIV/0!	Core
0	0	0	0	0	0	0	0	0	0	0	0	0	0	#DIV/0!	#DIV/0!	#DIV/0!	Core
0	0	0	0	0	0	0	0	0	0	0	0	0	0	#DIV/0!	#DIV/0!	#DIV/0!	Core
0	0	0	0	0	0	0	0	0	0	0	0	0	0	#DIV/0!	#DIV/0!	#DIV/0!	Core
0	0	0	0	0	0	0	0	0	0	0	0	0	0	#DIV/0!	#DIV/0!	#DIV/0!	Core
0	0	0	0	0	0	0	0	0	0	0	0	0	0	#DIV/0!	#DIV/0!	#DIV/0!	Core
0	0	0	0	0	0	0	0	0	0	0	0	0	0	#DIV/0!	#DIV/0!	#DIV/0!	Core
0	0	0	0	0	0	0	0	0	0	0	0	0	0	#DIV/0!	#DIV/0!	#DIV/0!	Core
0	0	0	0	0	0	0	0	0	0	0	0	0	0	#DIV/0!	#DIV/0!	#DIV/0!	Core

## Sheet: S5. U-Pb Colvin1
Sample Name: Colvin Mtn Ss [Colvin1]		611363	3756477					207/235		206/238		207/206		Best age
Grain #	[U] ppm	U/Th	207/235	2σ error	206/238	2σ error	RHO	Age Ma	2σ error	Age (Ma)	2σ error	Age (Ma)	2σ error	(Ma)	2σ error	% Discordance*	Th/U
Colvin1.62	519	-1.6	1.967	0.04	0.1916	0.0025	0	1101	14	1129	14	1026	40	1129	14	2.54314
Colvin1.60	992	66	1.99	0.049	0.1952	0.0039	0	1113	16	1148	21	1034	35	1148	21	3.14465	0.0151515
Colvin1.112	165.5	60	1.643	0.053	0.1733	0.0042	0	986	21	1030	23	876	58	1030	23	4.46247	0.0166667
Colvin1.55	344.7	37.8	1.429	0.04	0.1505	0.0037	0	897	17	903	21	863	46	903	21	0.668896	0.026455
Colvin1.135	423	36.8	1.89	0.12	0.185	0.013	0	1049	43	1079	71	1043	93	1079	71	2.85987	0.0271739
Colvin1.130	159.3	24.8	1.731	0.05	0.1734	0.0043	0	1014	19	1036	25	969	49	1036	25	2.16963	0.0403226
Colvin1.36	596	23.5	1.821	0.057	0.1816	0.0042	0	1048	22	1074	23	1017	42	1074	23	2.48092	0.0425532
Colvin1.14	328	19.4	1.674	0.033	0.1665	0.0022	0	996	13	992	12	1003	35	992	12	0.401606	0.0515464
Colvin1.109	208.1	15.05	1.641	0.088	0.1684	0.008	0	979	33	1001	44	923	84	1001	44	2.24719	0.0664452
Colvin1.24	314	10.91	1.517	0.04	0.1565	0.0034	0	933	16	936	19	889	42	936	19	0.321543	0.091659
Colvin1.131	185	10.12	1.833	0.055	0.179	0.0042	0	1051	19	1060	23	1020	48	1060	23	0.856327	0.0988142
Colvin1.57	457.4	9.12	1.558	0.039	0.1599	0.0041	0	952	16	955	23	948	41	955	23	0.315126	0.109649
Colvin1.117	119.9	8.9	2.07	0.056	0.1969	0.0041	0	1133	19	1157	22	1085	45	1157	22	2.11827	0.11236
Colvin1.45	183	8.75	2.12	0.077	0.2015	0.0056	0	1145	25	1181	30	1078	46	1181	30	3.1441	0.114286
Colvin1.110	221	8.57	2.56	0.1	0.2223	0.0055	0	1282	30	1292	29	1261	54	1261	54	2.45837	0.116686
Colvin1.157	281	7.83	1.775	0.044	0.1786	0.004	0	1032	16	1058	22	970	42	1058	22	2.51938	0.127714
Colvin1.49	252.4	7.45	1.566	0.042	0.1589	0.004	0	955	17	952	23	926	48	952	23	0.314136	0.134228
Colvin1.91	265	7.33	1.593	0.04	0.1596	0.0022	0	963	15	958	12	976	59	958	12	0.519211	0.136426
Colvin1.162	211	7.21	1.731	0.068	0.1741	0.0068	0	1010	26	1031	37	948	68	1031	37	2.07921	0.138696
Colvin1.146	195	7.07	1.85	0.16	0.19	0.019	0	1007	58	1090	100	940	130	1090	100	8.2423	0.141443
Colvin1.122	404	7	1.863	0.04	0.1738	0.0026	0	1065	14	1032	14	1123	36	1032	14	3.09859	0.142857
Colvin1.119	166	6.84	1.658	0.068	0.1702	0.0054	0	981	25	1011	30	899	65	1011	30	3.0581	0.146199
Colvin1.96	437	6.5	2.069	0.084	0.1987	0.0063	0	1125	28	1165	34	1091	44	1165	34	3.55556	0.153846
Colvin1.177	446	6.47	1.744	0.038	0.1735	0.003	0	1022	14	1031	17	970	37	1031	17	0.880626	0.15456
Colvin1.165	246.6	5.99	1.708	0.051	0.1715	0.0049	0	1007	20	1018	27	968	51	1018	27	1.09235	0.166945
Colvin1.101	268	5.76	1.948	0.068	0.1924	0.0055	0	1096	24	1132	30	1035	45	1132	30	3.28467	0.173611
Colvin1.161	134	5.52	1.856	0.074	0.1826	0.0059	0	1057	27	1083	33	1002	67	1083	33	2.45979	0.181159
Colvin1.21	403	5.49	1.753	0.038	0.1554	0.0027	0	1025	14	930	15	1203	37	930	15	9.26829	0.182149
Colvin1.74	352	5.49	1.964	0.069	0.188	0.0039	0	1099	22	1109	21	1079	77	1109	21	0.909918	0.182149
Colvin1.147	200.8	5.39	1.72	0.11	0.173	0.01	0	1004	40	1024	57	973	89	1024	57	1.99203	0.185529
Colvin1.124	41.2	5.28	2.03	0.11	0.1927	0.0055	0	1112	37	1135	30	1040	110	1135	30	2.06835	0.189394
Colvin1.125	108.8	5.26	1.624	0.052	0.1614	0.0027	0	974	20	964	15	980	62	964	15	1.02669	0.190114
Colvin1.52	63.3	5.24	1.83	0.1	0.179	0.0067	0	1044	36	1060	37	1013	93	1060	37	1.53257	0.19084
Colvin1.158	200	5.23	1.662	0.076	0.171	0.0077	0	980	29	1013	42	906	71	1013	42	3.36735	0.191205
Colvin1.56	226.7	5.23	1.849	0.053	0.1816	0.0051	0	1060	19	1073	28	1032	52	1073	28	1.22642	0.191205
Colvin1.164	85.8	5.22	1.93	0.12	0.183	0.012	0	1062	42	1070	65	1080	110	1070	65	0.753296	0.191571
Colvin1.114	684	5.182	1.622	0.031	0.1633	0.0031	0	976	12	974	17	977	29	974	17	0.204918	0.192976
Colvin1.93	210	5.08	2.51	0.15	0.1981	0.0075	0	1252	43	1166	39	1425	76	1166	39	6.86901	0.19685
Colvin1.48	136.7	5.05	1.837	0.096	0.1846	0.0081	0	1052	34	1090	44	960	86	1090	44	3.61217	0.19802
Colvin1.16	1296	5.03	1.369	0.038	0.1273	0.0036	0	871	16	771	21	1132	42	771	21	11.4811	0.198807
Colvin1.10	636	4.94	1.643	0.037	0.169	0.0039	0	984	14	1005	22	913	36	1005	22	2.13415	0.202429
Colvin1.45	429	4.91	2.226	0.092	0.2011	0.0066	0	1174	29	1178	35	1201	44	1178	35	0.340716	0.203666
Colvin1.25	62	4.875	1.574	0.069	0.1608	0.0042	0	951	28	960	23	916	87	960	23	0.946372	0.205128
Colvin1.172	174	4.72	2.6	0.13	0.219	0.009	0	1283	36	1270	48	1301	62	1301	62	2.38278	0.211864
Colvin1.41	331	4.68	1.798	0.058	0.1713	0.0063	0	1037	21	1026	32	1084	48	1026	32	1.06075	0.213675
Colvin1.57	1060	4.65	1.904	0.093	0.1664	0.0068	0	1073	30	988	38	1225	69	988	38	7.92171	0.215054
Colvin1.34	174.4	4.63	1.443	0.039	0.1481	0.0036	0	903	16	889	20	907	55	889	20	1.55039	0.215983
Colvin1.95	198.5	4.61	1.637	0.044	0.1738	0.0042	0	982	17	1031	23	880	49	1031	23	4.98982	0.21692
Colvin1.118	382	4.53	1.446	0.035	0.1375	0.003	0	905	14	830	17	1075	40	830	17	8.28729	0.220751
Colvin1.107	520	4.51	1.911	0.042	0.1814	0.0039	0	1081	14	1074	21	1114	36	1074	21	0.647549	0.221729
Colvin1.104	148.7	4.5	1.962	0.057	0.1887	0.0049	0	1096	19	1112	26	1065	47	1112	26	1.45985	0.222222
Colvin1.42	339	4.48	2.146	0.054	0.1968	0.0048	0	1159	18	1157	26	1152	32	1157	26	0.172563	0.223214
Colvin1.18	258	4.47	1.816	0.047	0.1745	0.0026	0	1049	16	1036	14	1060	49	1036	14	1.23928	0.223714
Colvin1.156	201	4.43	1.737	0.055	0.1761	0.0049	0	1018	21	1044	27	946	56	1044	27	2.55403	0.225734
Colvin1.120	97.5	4.42	1.726	0.054	0.1765	0.0034	0	1014	21	1047	19	933	60	1047	19	3.25444	0.226244
Colvin1.85	559	4.32	1.628	0.034	0.1696	0.0026	0	980	13	1009	14	926	35	1009	14	2.95918	0.231481
Colvin1.53	72.1	4.24	1.615	0.069	0.1694	0.0056	0	964	26	1006	31	862	78	1006	31	4.35685	0.235849
Colvin1.8	948	4.24	1.919	0.043	0.1851	0.0039	0	1084	15	1094	21	1025	33	1094	21	0.922509	0.235849
Colvin1.47	146.1	4.12	1.572	0.045	0.1524	0.0041	0	954	18	913	23	1014	60	913	23	4.29769	0.242718
Colvin1.80	735	4.1	1.74	0.041	0.177	0.0026	0	1021	15	1050	14	969	33	1050	14	2.84035	0.243902
Colvin1.54	353	4.03	1.743	0.041	0.1708	0.004	0	1023	15	1015	22	1030	43	1015	22	0.782014	0.248139
Colvin1.117	374	4.01	1.788	0.06	0.1761	0.0026	0	1034	20	1045	14	992	54	1045	14	1.06383	0.249377
Colvin1.121	163.7	4.01	2.144	0.053	0.203	0.0044	0	1160	17	1190	24	1107	49	1190	24	2.58621	0.249377
Colvin1.51	619	3.98	1.402	0.055	0.1398	0.0045	0	880	24	841	26	999	48	841	26	4.43182	0.251256
Colvin1.142	59.4	3.9	2.63	0.25	0.233	0.025	0	1231	74	1310	120	1200	150	1200	150	6.41755	0.25641
Colvin1.106	369	3.88	2.21	0.14	0.185	0.011	0	1155	40	1084	58	1331	60	1084	58	6.14719	0.257732
Colvin1.154	95.6	3.88	2.64	0.11	0.2312	0.0077	0	1305	29	1337	40	1209	65	1209	65	10.5873	0.257732
Colvin1.98	368	3.85	1.66	0.049	0.1634	0.0051	0	993	23	974	28	1023	92	974	28	1.91339	0.25974
Colvin1.99	266	3.849	1.549	0.032	0.1621	0.0025	0	947	13	968	14	905	41	968	14	2.21753	0.259808
Colvin1.109	426	3.82	2.045	0.047	0.1878	0.0021	0	1128	15	1109	12	1140	46	1109	12	1.6844	0.26178
Colvin1.67	99.2	3.78	1.523	0.051	0.16	0.0044	0	940	21	955	24	900	68	955	24	1.59574	0.26455
Colvin1.141	250	3.77	1.99	0.13	0.192	0.013	0	1091	44	1123	72	1066	82	1123	72	2.93309	0.265252
Colvin1.113	164	3.76	2.168	0.06	0.199	0.0048	0	1164	20	1168	26	1162	50	1168	26	0.343643	0.265957
Colvin1.175	216	3.745	2.541	0.056	0.2208	0.0044	0	1279	16	1288	23	1255	41	1255	41	2.62948	0.267023
Colvin1.61	101.2	3.74	2.954	0.067	0.249	0.004	0	1393	17	1433	21	1344	44	1344	44	6.62202	0.26738
Colvin1.110	71.9	3.71	1.858	0.096	0.1804	0.0077	0	1047	33	1064	42	1033	84	1064	42	1.62369	0.269542
Colvin1.163	110.1	3.683	1.656	0.057	0.1644	0.0048	0	986	23	979	26	978	69	979	26	0.709939	0.271518
Colvin1.169	119.6	3.683	1.991	0.076	0.1864	0.0051	0	1104	26	1100	28	1104	69	1100	28	0.362319	0.271518
Colvin1.71	356	3.678	1.652	0.036	0.1728	0.0029	0	987	14	1027	16	908	39	1027	16	4.05268	0.271887
Colvin1.43	168.1	3.66	1.37	0.049	0.1469	0.0048	0	869	21	882	27	820	62	882	27	1.49597	0.273224
Colvin1.152	33.5	3.64	1.69	0.14	0.176	0.012	0	969	51	1034	63	830	140	1034	63	6.70795	0.274725
Colvin1.170	68.8	3.59	2.12	0.11	0.1741	0.0075	0	1149	36	1032	41	1357	92	1032	41	10.1828	0.278552
Colvin1.102	86	3.59	1.797	0.091	0.1919	0.0077	0	1035	32	1129	41	884	83	1129	41	9.08213	0.278552
Colvin1.85	161	3.59	2.468	0.09	0.2257	0.0072	0	1259	26	1308	38	1233	45	1233	45	6.08273	0.278552
Colvin1.150	10.54	3.56	1.71	0.21	0.1667	0.0085	0	948	88	990	47	790	270	990	47	4.43038	0.280899
Colvin1.76	401	3.56	1.663	0.054	0.1764	0.0049	0	990	21	1045	27	889	49	1045	27	5.55556	0.280899
Colvin1.98	135.1	3.533	2	0.057	0.1975	0.004	0	1110	20	1161	22	1028	49	1161	22	4.59459	0.283046
Colvin1.136	116.8	3.5	3.31	0.15	0.26	0.013	0	1468	35	1477	65	1479	62	1479	62	0.135227	0.285714
Colvin1.06	229	3.498	1.662	0.037	0.1673	0.0027	0	993	15	997	15	973	43	997	15	0.40282	0.285878
Colvin1.105	124.8	3.48	2.94	0.11	0.245	0.01	0	1384	30	1404	54	1381	59	1381	59	1.66546	0.287356
Colvin1.155	57.4	3.401	2.34	0.34	0.1831	0.0079	0	1143	74	1080	43	1160	160	1080	43	5.51181	0.294031
Colvin1.94	105.5	3.4	1.44	0.059	0.1521	0.0055	0	896	24	910	31	864	78	910	31	1.5625	0.294118
Colvin1.28	254	3.38	1.717	0.054	0.1731	0.005	0	1010	20	1028	28	941	54	1028	28	1.78218	0.295858
Colvin1.80	130.9	3.34	1.624	0.065	0.1677	0.0061	0	969	24	996	34	943	65	996	34	2.78638	0.299401
Colvin1.2	473	3.335	1.522	0.035	0.159	0.0032	0	936	14	951	18	876	42	951	18	1.60256	0.29985
Colvin1.100	158.5	3.31	2.495	0.061	0.2239	0.0053	0	1268	17	1301	27	1197	56	1197	27	2.60252	0.302115
Colvin1.90	276.4	3.253	1.62	0.039	0.1714	0.0039	0	976	16	1019	21	898	41	1019	21	4.40574	0.307409
Colvin1.116	117.1	3.21	1.738	0.054	0.1719	0.0031	0	1018	21	1022	17	979	74	1022	17	0.392927	0.311526
Colvin1.73	613	3.189	1.657	0.033	0.1687	0.0033	0	990	13	1004	18	981	35	1004	18	1.41414	0.313578
Colvin1.31	172.4	3.17	1.816	0.046	0.1748	0.0039	0	1046	17	1037	22	1054	44	1037	22	0.860421	0.315457
Colvin1.6	698	3.143	1.449	0.028	0.1479	0.003	0	909	12	888	17	962	39	888	17	2.31023	0.318167
Colvin1.33	324	3.12	1.947	0.047	0.1874	0.0042	0	1098	16	1106	23	1055	36	1106	23	0.728597	0.320513
Colvin1.108	55	3.1	1.7	0.13	0.1578	0.0035	0	987	45	943	19	1060	150	943	19	4.45795	0.322581
Colvin1.36	221	3.09	1.489	0.035	0.1552	0.003	0	924	15	929	17	891	44	929	17	0.541126	0.323625
Colvin1.97	35.6	3.07	1.84	0.13	0.1842	0.0065	0	1024	48	1093	37	880	150	1093	37	6.73828	0.325733
Colvin1.173	183.7	3.039	2.962	0.087	0.235	0.0059	0	1389	22	1358	31	1415	47	1415	47	4.02827	0.329056
Colvin1.58	279.3	3.03	0.714	0.054	0.0811	0.002	0	534	27	502	12	600	100	502	12	5.99251	0.330033
Colvin1.7	153.5	3.03	1.447	0.047	0.1508	0.0039	0	905	19	904	22	871	61	904	22	0.110497	0.330033
Colvin1.148	62.7	3.01	1.614	0.091	0.1631	0.0066	0	964	36	971	36	904	98	971	36	0.726141	0.332226
Colvin1.153	104.6	2.962	1.71	0.067	0.1705	0.0048	0	1002	24	1013	26	945	75	1013	26	1.0978	0.33761
Colvin1.151	466	2.96	1.987	0.063	0.1759	0.0083	0	1103	21	1039	46	1184	63	1039	46	5.80236	0.337838
Colvin1.93	118.5	2.951	1.887	0.065	0.1832	0.0034	0	1071	22	1083	19	1019	67	1083	19	1.12045	0.338868
Colvin1.97	85	2.95	2.286	0.089	0.2065	0.0079	0	1195	28	1205	42	1222	59	1222	59	1.39116	0.338983
Colvin1.147	31.5	2.92	1.66	0.18	0.167	0.011	0	970	69	991	62	860	190	991	62	2.16495	0.342466
Colvin1.127	124.2	2.92	1.772	0.082	0.1707	0.0076	0	1020	30	1011	42	1029	77	1011	42	0.882353	0.342466
Colvin1.40	50.9	2.91	1.621	0.08	0.144	0.004	0	976	33	866	22	1160	120	866	22	11.2705	0.343643
Colvin1.139	76.1	2.89	2.545	0.08	0.2234	0.0053	0	1279	23	1298	28	1233	58	1233	58	5.2717	0.346021
Colvin1.137	68.1	2.88	1.557	0.078	0.1567	0.0073	0	941	30	934	40	940	100	934	40	0.743889	0.347222
Colvin1.26	107.7	2.88	1.625	0.068	0.1622	0.0041	0	973	25	968	23	946	78	968	23	0.513875	0.347222
Colvin1.99	183.4	2.86	2.503	0.08	0.2052	0.0039	0	1278	19	1202	21	1394	46	1394	46	13.7733	0.34965
Colvin1.115	331	2.85	2.122	0.07	0.2	0.0068	0	1147	23	1172	36	1133	50	1172	36	2.1796	0.350877
Colvin1.123	178	2.845	1.532	0.042	0.1546	0.0035	0	938	17	926	19	963	50	926	19	1.27932	0.351494
Colvin1.95	138.9	2.83	1.674	0.048	0.1711	0.0026	0	995	18	1017	14	934	55	1017	14	2.21106	0.353357
Colvin1.35	466	2.816	1.669	0.03	0.17	0.0024	0	995	12	1011	13	961	29	1011	13	1.60804	0.355114
Colvin1.27	424	2.81	2.005	0.041	0.1883	0.0035	0	1114	14	1111	19	1095	34	1111	19	0.2693	0.355872
Colvin1.58	424	2.77	2.287	0.072	0.1993	0.0039	0	1207	25	1170	21	1253	59	1170	21	3.06545	0.361011
Colvin1.129	67	2.76	1.77	0.15	0.177	0.017	0	991	58	1035	91	990	120	1035	91	4.43996	0.362319
Colvin1.34	272	2.75	1.884	0.042	0.1825	0.0028	0	1072	15	1080	15	1032	54	1080	15	0.746269	0.363636
Colvin1.46	183	2.75	2.306	0.091	0.2179	0.0071	0	1209	29	1267	37	1138	67	1138	37	4.79735	0.363636
Colvin1.79	151	2.748	1.681	0.053	0.1713	0.0028	0	996	21	1021	16	922	74	1021	16	2.51004	0.363901
Colvin1.59	124.6	2.71	2.747	0.061	0.2272	0.0043	0	1337	16	1319	22	1374	37	1374	37	4.00291	0.369004
Colvin1.84	112.2	2.705	3.118	0.086	0.2503	0.0042	0	1429	21	1439	22	1403	58	1403	58	2.56593	0.369686
Colvin1.12	243	2.702	1.648	0.058	0.1708	0.0053	0	984	22	1015	29	895	57	1015	29	3.15041	0.370096
Colvin1.09	101.9	2.694	1.732	0.069	0.1744	0.0026	0	1006	20	1036	14	924	59	1036	14	2.98211	0.371195
Colvin1.100	14.5	2.69	1.85	0.33	0.1517	0.0083	0	917	72	905	46	950	220	905	46	1.30862	0.371747
Colvin1.144	29.6	2.66	2.3	0.25	0.217	0.025	0	1107	80	1220	130	1040	180	1040	130	10.2078	0.37594
Colvin1.39	110.7	2.619	1.926	0.05	0.1823	0.0041	0	1087	18	1081	23	1076	48	1081	23	0.551978	0.381825
Colvin1.13	346	2.569	1.499	0.04	0.1577	0.0036	0	926	16	943	20	846	44	943	20	1.83585	0.389257
Colvin1.104	75.2	2.53	2.185	0.092	0.1943	0.0039	0	1163	28	1143	21	1127	85	1143	21	1.71969	0.395257
Colvin1.17	80.6	2.52	1.657	0.059	0.1619	0.0032	0	999	22	967	18	1025	72	967	18	3.2032	0.396825
Colvin1.140	78.8	2.52	1.938	0.076	0.1751	0.0058	0	1086	26	1038	32	1160	77	1038	32	4.41989	0.396825
Colvin1.176	232	2.512	2.655	0.073	0.2205	0.0047	0	1314	20	1283	25	1307	40	1307	40	1.83627	0.398089
Colvin1.50	259	2.51	11.22	0.29	0.464	0.014	0	2534	25	2454	59	2611	30	2611	30	6.01302	0.398406
Colvin1.111	39.6	2.501	2.06	0.11	0.1974	0.0076	0	1128	36	1159	41	1070	120	1159	41	2.74823	0.39984
Colvin1.94	108.2	2.5	1.688	0.066	0.1723	0.0028	0	999	27	1027	16	890	85	1027	16	2.8028	0.4
Colvin1.89	57.3	2.5	2.423	0.097	0.2198	0.0063	0	1239	29	1278	33	1178	70	1178	33	3.1477	0.4
Colvin1.88	117.7	2.49	1.95	0.065	0.1854	0.0032	0	1097	22	1096	17	1110	75	1096	17	0.0911577	0.401606
Colvin1.81	72.9	2.49	3.28	0.16	0.272	0.012	0	1462	38	1545	59	1367	92	1367	92	13.0212	0.401606
Colvin1.106	208	2.49	3.1	0.13	0.242	0.012	0	1420	32	1434	51	1450	56	1450	56	1.10345	0.401606
Colvin1.120	240	2.47	1.64	0.054	0.1706	0.0033	0	981	21	1017	19	891	69	1017	19	3.66972	0.404858
Colvin1.77	225	2.47	1.657	0.06	0.1715	0.0056	0	983	23	1022	30	942	71	1022	30	3.96745	0.404858
Colvin1.24	389	2.463	1.506	0.054	0.1488	0.0062	0	924	24	890	35	1072	50	890	35	3.67965	0.406009
Colvin1.79	202.1	2.463	1.676	0.044	0.1734	0.0037	0	997	17	1030	20	939	48	1030	20	3.30993	0.406009
Colvin1.44	156.9	2.43	1.702	0.079	0.1625	0.0032	0	1000	26	970	18	1038	78	970	18	3	0.411523
Colvin1.46	121.9	2.41	1.585	0.052	0.1479	0.0043	0	960	21	888	24	1080	85	888	24	7.5	0.414938
Colvin1.159	78.3	2.41	2.732	0.076	0.2343	0.0054	0	1333	20	1355	28	1287	57	1287	57	5.28361	0.414938
Colvin1.87	125.2	2.386	2.468	0.061	0.2109	0.0039	0	1257	18	1233	21	1321	49	1321	49	6.66162	0.419111
Colvin1.22	142	2.38	1.523	0.051	0.1584	0.0048	0	933	20	946	27	884	68	946	27	1.39335	0.420168
Colvin1.88	253	2.38	1.759	0.056	0.1678	0.0058	0	1026	20	997	33	1097	52	997	33	2.82651	0.420168
Colvin1.30	131.8	2.372	2.831	0.071	0.2328	0.0051	0	1361	19	1347	27	1353	45	1353	45	0.443459	0.421585
Colvin1.90	57.5	2.37	2.19	0.26	0.1637	0.0038	0	1111	66	976	21	1310	170	976	21	12.1512	0.421941
Colvin1.82	140.6	2.36	1.539	0.045	0.162	0.0037	0	941	18	969	21	887	63	969	21	2.97556	0.423729
Colvin1.91	116.2	2.359	1.531	0.051	0.1601	0.0038	0	936	20	956	21	905	66	956	21	2.13675	0.423908
Colvin1.92	138.1	2.35	1.7	0.045	0.1747	0.0034	0	1004	17	1037	19	943	48	1037	19	3.28685	0.425532
Colvin1.47	414	2.31	2.228	0.067	0.206	0.0061	0	1185	22	1205	33	1165	60	1165	33	1.68776	0.4329
Colvin1.51	93.5	2.3	1.419	0.052	0.1477	0.0032	0	889	22	887	18	863	74	887	18	0.224972	0.434783
Colvin1.113	84.1	2.23	2.044	0.07	0.1906	0.0049	0	1120	24	1123	26	1114	81	1123	26	0.267857	0.44843
Colvin1.174	137	2.22	2.42	0.086	0.216	0.0073	0	1244	27	1257	39	1211	61	1211	61	3.79851	0.45045
Colvin1.23	432.8	2.216	1.496	0.034	0.1537	0.0034	0	925	14	921	19	911	38	921	19	0.432432	0.451264
Colvin1.75	75.6	2.211	2.042	0.069	0.1992	0.0045	0	1120	23	1169	24	1028	75	1169	24	4.375	0.452284
Colvin1.132	41.9	2.21	1.846	0.089	0.1799	0.0049	0	1044	32	1065	27	981	98	1065	27	2.01149	0.452489
Colvin1.160	146.4	2.18	2.57	0.16	0.229	0.015	0	1268	47	1313	76	1206	79	1206	79	8.87231	0.458716
Colvin1.119	54	2.17	1.79	0.12	0.1638	0.0039	0	1022	37	977	21	1060	130	977	21	4.40313	0.460829
Colvin1.108	54.7	2.165	1.846	0.073	0.1759	0.0046	0	1054	25	1043	25	1062	80	1043	25	1.04364	0.461894
Colvin1.62	36.9	2.16	2.11	0.11	0.1909	0.0059	0	1142	34	1124	32	1165	93	1124	32	1.57618	0.462963
Colvin1.149	70.9	2.155	3.73	0.2	0.27	0.014	0	1549	44	1531	69	1588	82	1588	82	3.58942	0.464037
Colvin1.65	21.1	2.15	2.52	0.14	0.214	0.0083	0	1255	39	1245	44	1270	110	1270	110	1.9685	0.465116
Colvin1.86	655	2.14	1.367	0.064	0.1224	0.0052	0	868	27	743	30	1220	57	743	30	14.4009	0.46729
Colvin1.145	131.6	2.14	2.15	0.16	0.205	0.017	0	1125	53	1181	88	1080	100	1181	88	4.97778	0.46729
Colvin1.111	110.9	2.13	1.737	0.072	0.1803	0.0066	0	1019	25	1054	27	929	87	1054	27	3.43474	0.469484
Colvin1.38	179	2.124	1.583	0.048	0.1651	0.0043	0	958	19	984	24	879	56	984	24	2.71399	0.47081
Colvin1.102	81	2.113	1.877	0.084	0.1841	0.0052	0	1059	29	1087	29	999	90	1087	29	2.644	0.473261
Colvin1.107	99.1	2.1	2.477	0.088	0.2166	0.0048	0	1261	24	1262	25	1283	80	1283	80	1.63679	0.47619
Colvin1.72	238	2.093	2.69	0.055	0.2331	0.0037	0	1324	15	1350	19	1275	43	1275	43	5.88235	0.477783
Colvin1.89	530	2.09	1.638	0.03	0.1635	0.0028	0	983	12	975	16	1022	38	975	16	0.813835	0.478469
Colvin1.101	145.9	2.09	1.714	0.053	0.1735	0.0027	0	1007	20	1031	15	955	71	1031	15	2.38332	0.478469
Colvin1.70	200.9	2.068	2.647	0.075	0.2244	0.005	0	1310	21	1304	26	1342	50	1342	50	2.83159	0.483559
Colvin1.64	144	2.02	2.021	0.059	0.2003	0.0047	0	1119	19	1175	25	1026	45	1175	25	5.00447	0.49505
Colvin1.116	204	1.999	3.15	0.15	0.257	0.011	0	1426	38	1464	58	1381	64	1381	64	6.01014	0.50025
Colvin1.37	61.7	1.997	1.842	0.095	0.1776	0.0063	0	1050	33	1052	35	1018	86	1052	35	0.190476	0.500751
Colvin1.23	342	1.99	2.05	0.16	0.176	0.0033	0	1078	25	1044	18	1134	65	1044	18	3.15399	0.502513
Colvin1.66	178.7	1.95	1.717	0.045	0.1755	0.0044	0	1015	18	1041	24	978	52	1041	24	2.56158	0.512821
Colvin1.69	410	1.933	1.749	0.042	0.1802	0.004	0	1026	15	1067	22	948	43	1067	22	3.9961	0.517331
Colvin1.42	324	1.931	1.638	0.039	0.164	0.0031	0	983	14	978	17	970	49	978	17	0.508647	0.517866
Colvin1.78	850	1.93	1.61	0.045	0.159	0.0053	0	971	18	955	27	1092	39	955	27	1.64779	0.518135
Colvin1.05	97.9	1.9	1.683	0.054	0.1689	0.003	0	995	21	1008	16	983	70	1008	16	1.30653	0.526316
Colvin1.19	608	1.899	1.55	0.043	0.1489	0.006	0	952	17	896	35	1138	57	896	35	5.88235	0.526593
Colvin1.68	149.9	1.89	3.034	0.095	0.2489	0.0068	0	1406	24	1429	35	1386	50	1386	50	3.10245	0.529101
Colvin1.84	209	1.878	0.513	0.022	0.0704	0.0024	0	417	15	438	15	348	89	438	15	5.03597	0.532481
Colvin1.1	331	1.878	1.586	0.036	0.1634	0.0033	0	963	14	975	18	904	45	975	18	1.24611	0.532481
Colvin1.115	139	1.87	1.72	0.055	0.1678	0.0035	0	1009	21	999	19	1018	74	999	19	0.99108	0.534759
Colvin1.92	103	1.85	1.628	0.073	0.1658	0.0049	0	981	25	993	25	911	83	993	25	1.22324	0.540541
Colvin1.13	92.6	1.848	3.15	0.078	0.2488	0.0043	0	1439	19	1431	22	1435	47	1435	47	0.278746	0.541126
Colvin1.103	51.7	1.842	1.647	0.072	0.175	0.0049	0	981	28	1039	27	866	92	1039	27	5.91233	0.542888
Colvin1.83	112.4	1.78	1.98	0.18	0.1737	0.0026	0	1069	45	1032	15	1090	120	1032	15	3.46118	0.561798
Colvin1.87	46.7	1.77	2.76	0.21	0.2227	0.0069	0	1318	46	1293	37	1320	120	1320	120	2.04545	0.564972
Colvin1.19	63.7	1.76	1.475	0.068	0.1477	0.0043	0	907	28	886	24	900	99	886	24	2.31533	0.568182
Colvin1.4	188	1.76	1.771	0.067	0.1736	0.0059	0	1025	25	1029	32	992	71	1029	32	0.390244	0.568182
Colvin1.29	186.2	1.758	0.545	0.021	0.0703	0.0015	0	438	14	437.7	9.2	417	84	437.7	9.2	0.0684932	0.568828
Colvin1.10	143	1.756	2.184	0.046	0.2008	0.0034	0	1172	15	1179	18	1185	46	1179	18	0.59727	0.569476
Colvin1.32	43.9	1.751	1.454	0.059	0.1489	0.0042	0	901	25	893	23	876	92	893	23	0.887902	0.571102
Colvin1.128	188.8	1.745	3.056	0.089	0.2477	0.0077	0	1413	22	1422	39	1389	44	1389	44	2.37581	0.573066
Colvin1.73	215	1.718	2.994	0.081	0.2433	0.0045	0	1399	20	1402	24	1383	54	1383	54	1.37383	0.582072
Colvin1.76	327	1.71	1.709	0.056	0.1705	0.0036	0	1004	22	1014	20	999	63	1014	20	0.996016	0.584795
Colvin1.134	54.1	1.71	1.827	0.078	0.1752	0.004	0	1048	27	1040	22	1039	87	1040	22	0.763359	0.584795
Colvin1.20	643	1.705	1.472	0.04	0.1309	0.0037	0	916	16	792	21	1211	32	792	21	13.5371	0.58651
Colvin1.5	121.9	1.704	2.58	0.076	0.2191	0.0063	0	1287	22	1274	33	1293	49	1293	49	1.46945	0.586854
Colvin1.32	610	1.662	1.952	0.049	0.1808	0.0052	0	1096	18	1069	28	1172	37	1069	28	2.4635	0.601685
Colvin1.65	591	1.655	1.954	0.051	0.1949	0.0041	0	1100	17	1147	22	1027	46	1147	22	4.27273	0.60423
Colvin1.40	537	1.653	2.977	0.064	0.2457	0.0061	0	1397	17	1419	30	1425	42	1425	42	0.421053	0.604961
Colvin1.27	116.9	1.605	2.983	0.075	0.2427	0.0044	0	1397	19	1399	23	1388	47	1388	47	0.792507	0.623053
Colvin1.18	128.2	1.598	2.046	0.074	0.189	0.0065	0	1127	26	1113	35	1134	60	1113	35	1.24224	0.625782
Colvin1.9	383	1.597	1.618	0.052	0.1675	0.0051	0	972	20	997	28	906	49	997	28	2.57202	0.626174
Colvin1.41	160.6	1.558	2.923	0.054	0.246	0.0064	0	1386	15	1415	32	1347	39	1347	39	5.04826	0.641849
Colvin1.17	315	1.551	1.821	0.066	0.1742	0.0052	0	1052	25	1034	28	1067	64	1034	28	1.71103	0.644745
Colvin1.29	224	1.548	1.822	0.04	0.1826	0.0034	0	1052	14	1080	18	1001	46	1080	18	2.6616	0.645995
Colvin1.72	97.1	1.543	2.958	0.09	0.2568	0.0058	0	1391	23	1471	30	1297	56	1297	56	13.4156	0.648088
Colvin1.11	170.8	1.542	1.49	0.046	0.156	0.004	0	922	19	933	22	873	59	933	22	1.19306	0.648508
Colvin1.166	146.8	1.53	1.856	0.061	0.1722	0.0047	0	1058	21	1022	26	1092	62	1022	26	3.40265	0.653595
Colvin1.118	345	1.53	3.144	0.062	0.2584	0.0038	0	1440	15	1481	19	1395	38	1395	38	6.16487	0.653595
Colvin1.22	62.7	1.516	1.996	0.086	0.1794	0.0036	0	1106	27	1062	20	1167	90	1062	20	3.9783	0.659631
Colvin1.43	115.1	1.475	2.66	0.093	0.2123	0.0033	0	1306	25	1240	18	1411	67	1411	67	12.1191	0.677966
Colvin1.96	209	1.473	2.181	0.066	0.2053	0.0066	0	1167	21	1201	35	1135	43	1135	35	2.91345	0.678887
Colvin1.12	69.7	1.472	1.532	0.067	0.1514	0.0036	0	942	25	910	20	978	85	910	20	3.39703	0.679348
Colvin1.14	256.1	1.46	1.524	0.045	0.1537	0.004	0	935	18	921	23	930	66	921	23	1.49733	0.684932
Colvin1.126	119.8	1.46	1.882	0.063	0.1755	0.004	0	1069	22	1041	22	1083	62	1041	22	2.61927	0.684932
Colvin1.28	49.9	1.46	2.47	0.13	0.2239	0.0054	0	1265	36	1301	28	1247	99	1247	99	4.33039	0.684932
Colvin1.44	31.1	1.4	1.446	0.089	0.1427	0.0063	0	884	38	857	36	930	140	857	36	3.0543	0.714286
Colvin1.83	26.8	1.397	2.11	0.13	0.1917	0.0065	0	1133	41	1127	35	1130	110	1127	35	0.529568	0.71582
Colvin1.02	340	1.353	2.364	0.064	0.2003	0.0054	0	1225	20	1174	29	1307	37	1174	29	4.16327	0.739098
Colvin1.60	45.5	1.343	0.594	0.049	0.0667	0.002	0	462	30	416	12	660	170	416	12	9.95671	0.744602
Colvin1.31	530	1.341	1.838	0.055	0.1606	0.0055	0	1055	20	958	30	1286	35	958	30	9.19431	0.745712
Colvin1.63	80.8	1.34	1.575	0.057	0.1588	0.005	0	954	23	948	28	970	85	948	28	0.628931	0.746269
Colvin1.86	86.2	1.338	2.027	0.062	0.1937	0.0041	0	1117	21	1143	23	1061	68	1143	23	2.32766	0.747384
Colvin1.59	611	1.327	2.031	0.055	0.1761	0.0055	0	1121	19	1044	31	1249	48	1044	31	6.86887	0.75358
Colvin1.171	265	1.315	2.287	0.086	0.1969	0.0058	0	1196	27	1156	31	1286	40	1156	31	3.34448	0.760456
Colvin1.52	1430	1.303	1.391	0.036	0.1256	0.0043	0	881	15	764	25	1203	37	764	25	13.2804	0.76746
Colvin1.82	119	1.303	4.18	0.11	0.2988	0.0057	0	1663	21	1683	28	1633	54	1633	54	3.06185	0.76746
Colvin1.114	299	1.29	0.717	0.022	0.0914	0.0013	0	546	13	563.5	7.9	448	69	563.5	7.9	3.20513	0.775194
Colvin1.78	340	1.286	1.609	0.034	0.1603	0.0021	0	973	14	958	11	1007	45	958	11	1.54162	0.777605
Colvin1.11	87.1	1.238	2.209	0.069	0.2027	0.0039	0	1186	19	1189	21	1183	52	1189	21	0.252951	0.807754
Colvin1.138	41.11	1.232	1.795	0.08	0.167	0.0035	0	1038	28	995	19	1101	94	995	19	4.14258	0.811688
Colvin1.20	97.6	1.22	2.483	0.054	0.2197	0.0044	0	1268	16	1279	23	1231	48	1231	48	3.89927	0.819672
Colvin1.68	159	1.17	2.95	0.11	0.2519	0.0054	0	1385	31	1446	28	1337	66	1337	66	8.15258	0.854701
Colvin1.81	82.7	1.143	3.11	0.4	0.2303	0.0071	0	1346	36	1338	36	1340	91	1340	91	0.149254	0.874891
Colvin1.35	79	1.114	1.355	0.058	0.1298	0.0028	0	859	26	786	16	1017	95	786	16	8.49825	0.897666
Colvin1.21	38.7	1.109	1.722	0.069	0.1751	0.0041	0	1006	26	1039	23	924	84	1039	23	3.28032	0.901713
Colvin1.61	129.9	1.09	1.843	0.061	0.178	0.0039	0	1053	22	1055	21	1033	83	1055	21	0.189934	0.917431
Colvin1.30	292	1.066	2.97	0.1	0.24	0.0077	0	1389	28	1382	41	1451	35	1451	35	4.75534	0.938086
Colvin1.04	144.8	1.06	2.04	0.06	0.1925	0.0034	0	1131	20	1134	19	1112	57	1134	19	0.265252	0.943396
Colvin1.86	107.9	1.058	2.5	0.18	0.218	0.015	0	1257	54	1266	80	1260	100	1260	100	0.47619	0.94518
Colvin1.15	55.2	1.036	1.396	0.07	0.151	0.0042	0	881	28	905	23	810	110	905	23	2.72418	0.965251
Colvin1.105	208	1.022	1.915	0.068	0.1778	0.0029	0	1080	26	1054	16	1139	71	1054	16	2.40741	0.978474
Colvin1.75	208	1.004	3.091	0.069	0.2482	0.0048	0	1425	17	1435	23	1420	48	1420	48	1.05634	0.996016
Colvin1.77	183	0.976	2.99	0.11	0.232	0.0044	0	1403	24	1343	23	1485	53	1485	53	9.56229	1.02459
Colvin1.112	179	0.959	1.582	0.072	0.1552	0.0031	0	958	27	929	17	1015	84	929	17	3.02714	1.04275
Colvin1.33	77.6	0.9	1.94	0.13	0.1709	0.005	0	1051	26	1015	28	1149	91	1015	28	3.42531	1.11111
Colvin1.07	152.5	0.868	1.537	0.038	0.1546	0.0032	0	941	15	926	18	990	61	926	18	1.59405	1.15207
Colvin1.03	517	0.844	1.855	0.063	0.1756	0.0055	0	1056	24	1040	31	1132	42	1040	31	1.51515	1.18483
Colvin1.26	131.9	0.824	2.829	0.088	0.228	0.0054	0	1350	21	1322	29	1394	55	1394	55	5.16499	1.21359
Colvin1.63	165.9	0.8	3.842	0.086	0.3119	0.0056	0	1598	19	1748	27	1482	39	1482	39	17.9487	1.25
Colvin1.69	331	0.795	0.537	0.024	0.0728	0.0013	0	440	15	452.9	8	350	100	452.9	8	2.93182	1.25786
Colvin1.70	631	0.702	1.646	0.057	0.1495	0.0067	0	984	23	894	38	1230	52	894	38	9.14634	1.4245
Colvin1.01	145.2	0.679	1.807	0.051	0.1722	0.0037	0	1043	18	1023	21	1093	58	1023	21	1.91755	1.47275
Colvin1.38	39.5	0.649	2.31	0.11	0.1909	0.0058	0	1198	35	1123	31	1300	110	1123	31	6.26043	1.54083
Colvin1.66	874	0.643	1.646	0.045	0.1536	0.0049	0	983	17	919	27	1190	44	919	27	6.51068	1.55521
Colvin1.74	63	0.64	1.88	0.15	0.158	0.0048	0	1064	54	945	27	1290	160	945	27	11.1842	1.5625
Colvin1.64	1407	0.617	1.415	0.043	0.125	0.0035	0	889	18	758	20	1236	66	758	20	14.7357	1.62075
Colvin1.3	179	0.544	1.707	0.063	0.1588	0.0046	0	1004	24	949	25	1111	59	949	25	5.47809	1.83824
Colvin1.53	184.6	0.539	1.46	0.051	0.135	0.005	0	913	21	814	29	1160	100	814	29	10.8434	1.85529
Colvin1.39	1003	0.445	1.245	0.028	0.1119	0.0024	0	820	13	683	14	1226	38	683	14	16.7073	2.24719
Colvin1.15	58.3	0.271	1.683	0.082	0.1458	0.0046	0	988	32	876	26	1200	110	876	26	11.336	3.69004
Colvin1.50	4.69	0.1357	112.1	6.3	1.142	0.081	0	4779	57	4870	210	4771	76	4771	76	2.07504
Colvin1.37	5	0.1239	126.2	7.3	1.313	0.095	0	4892	52	5280	240	4800	58	4800	58	10
Colvin1.133	69.7	1.98	3.14	0.29	0.272	0.028	0	1348	76	1500	140	1240	140	DISC	DISC	20.9677
Colvin1.143	182	7.22	2.41	0.27	0.25	0.036	0	1119	88	1350	180	1000	170	DISC	DISC	20.6434
Colvin1.167	1680	4.88	0.971	0.064	0.0729	0.0062	0	676	32	450	37	1615	49	DISC	DISC	33.432
Colvin1.168	41.2	1.566	4.74	0.32	0.263	0.011	0	1745	60	1495	56	2030	110	DISC	DISC	26.3547
Colvin1.103	1490	0.326	0.844	0.027	0.0778	0.0024	0	617	14	484	15	1421	34	DISC	DISC	21.5559
Colvin1.16	960	1.34	1.372	0.045	0.1089	0.0041	0	874	21	665	24	1485	44	DISC	DISC	23.913
Colvin1.25	1390	0.701	0.794	0.021	0.0759	0.0021	0	595	13	473	13	1355	31	DISC	DISC	20.5042
Colvin1.55	189	-0.207	5.57	0.29	0.486	0.025	0	1885	45	2540	110	1315	34	DISC	DISC	93.1559
Colvin1.56	47.5	0.136	8.21	0.37	0.666	0.027	0	2230	40	3280	110	1391	51	DISC	DISC	135.802
Colvin1.67	232	0.93	9.1	1.2	0.302	0.019	0	2040	140	1677	92	2340	180	DISC	DISC	28.3333
Colvin1.71	3750	1.141	1.325	0.067	0.1033	0.0064	0	841	30	630	37	1559	34	DISC	DISC	25.0892
Colvin1.08	0.62	0	0	0	0	0	0	0	0	0	0	0	0	#DIV/0!	#DIV/0!	#DIV/0!

## Sheet: S6. U-Pb Colvin2
Sample Name: Colvin Mtn Sandstone [Colvin2]		611363	3756477					207/235		206/238		207/206		Best age
Grain #	[U] ppm	U/Th	207/235	2σ error	206/238	2σ error	RHO	Age Ma	2σ error	Age (Ma)	2σ error	Age (Ma)	2σ error	(Ma)	2σ error	% Discordance*	Rim/Core
Colvin2.69	439	16.9	2.164	0.099	0.2066	0.0063	0	1158	31	1209	34	1079	56	1079	34	4.40415	0.0591716
Colvin2.110	848	8.06	1.594	0.052	0.1564	0.0036	0	963	20	936	20	1013	46	936	20	2.80374	0.124069
Colvin2.43	878	5.62	2.089	0.08	0.1861	0.0037	0	1137	27	1100	20	1186	44	1100	20	3.25418	0.177936
Colvin2.18	221	4.37	1.98	0.1	0.1762	0.0054	0	1101	35	1045	29	1172	78	1045	29	5.08629	0.228833
Colvin2.78	321	4.162	1.681	0.056	0.1662	0.003	0	996	21	991	16	984	57	991	16	0.502008	0.240269
Colvin2.52	1200	4.08	1.546	0.077	0.1296	0.0045	0	938	30	788	26	1299	47	788	26	15.9915	0.245098
Colvin2.90	304.3	4.069	1.703	0.047	0.1702	0.0031	0	1006	18	1013	17	965	63	1013	17	0.695825	0.245761
Colvin2.81	208	3.82	2.42	0.12	0.2211	0.0073	0	1238	36	1285	39	1130	82	1130	39	3.79645	0.26178
Colvin2.22	351	3.47	1.782	0.053	0.1781	0.0038	0	1035	19	1056	21	986	55	1056	21	2.02899	0.288184
Colvin2.5	155.5	3.417	1.897	0.076	0.1819	0.0036	0	1076	28	1076	19	1029	82	1076	19	0	0.292654
Colvin2.83	314	3.35	1.737	0.056	0.169	0.0037	0	1017	21	1006	21	1014	65	1006	21	1.08161	0.298507
Colvin2.12	246	3.322	1.575	0.06	0.1566	0.0033	0	953	24	937	19	953	84	937	19	1.67891	0.301023
Colvin2.50	215.5	3.22	2.34	0.073	0.1944	0.0041	0	1219	22	1144	22	1334	66	1144	22	6.15258	0.310559
Colvin2.96	331.4	3.12	1.615	0.054	0.1602	0.003	0	971	21	957	17	965	63	957	17	1.44181	0.320513
Colvin2.32	218	3.12	2.55	0.11	0.2242	0.0058	0	1285	30	1303	30	1220	69	1220	69	6.80328	0.320513
Colvin2.99	1061	3	2.043	0.047	0.1913	0.0031	0	1127	16	1128	17	1122	28	1128	17	0.0887311	0.333333
Colvin2.103	532	2.949	2.004	0.055	0.1864	0.0034	0	1113	18	1101	18	1116	52	1101	18	1.07817	0.339098
Colvin2.38	737	2.817	1.801	0.042	0.1666	0.0035	0	1045	16	992	19	1138	42	992	19	5.07177	0.354988
Colvin2.59	356	2.8	2.021	0.067	0.1933	0.0042	0	1121	23	1138	22	1073	52	1138	22	1.5165	0.357143
Colvin2.66	643	2.74	1.84	0.073	0.1817	0.0052	0	1060	28	1075	28	1024	48	1075	28	1.41509	0.364964
Colvin2.117	98	2.67	2.17	0.1	0.202	0.0049	0	1174	34	1185	26	1117	90	1185	26	0.936968	0.374532
Colvin2.126	1113	2.66	1.79	0.045	0.1654	0.0038	0	1039	17	986	21	1147	50	986	21	5.10106	0.37594
Colvin2.84	211	2.63	2.071	0.07	0.1988	0.0039	0	1133	23	1168	21	1039	69	1168	21	3.08914	0.380228
Colvin2.120	551	2.598	3.254	0.086	0.2506	0.0059	0	1468	21	1445	32	1478	42	1478	42	2.23275	0.384911
Colvin2.46	506	2.583	1.661	0.047	0.1619	0.0044	0	993	17	966	24	1020	58	966	24	2.71903	0.387147
Colvin2.24	328	2.566	1.779	0.064	0.1742	0.0039	0	1032	23	1034	22	1010	63	1034	22	0.193798	0.389712
Colvin2.27	592	2.538	1.776	0.04	0.1767	0.0035	0	1034	15	1048	19	981	52	1048	19	1.35397	0.394011
Colvin2.30	458	2.514	2.881	0.08	0.227	0.0051	0	1372	21	1317	27	1425	46	1425	46	7.57895	0.397772
Colvin2.33	685	2.51	1.767	0.05	0.1652	0.0034	0	1029	18	985	18	1100	47	985	18	4.276	0.398406
Colvin2.118	456	2.49	1.561	0.049	0.1569	0.0036	0	951	19	939	20	952	60	939	20	1.26183	0.401606
Colvin2.47	263	2.479	2.335	0.07	0.2044	0.0047	0	1218	21	1198	25	1248	54	1198	25	1.64204	0.403388
Colvin2.49	385	2.457	2.109	0.053	0.1853	0.0044	0	1148	17	1095	24	1244	51	1095	24	4.61672	0.407
Colvin2.45	325	2.32	2.142	0.064	0.1888	0.0042	0	1157	21	1114	23	1240	66	1114	23	3.71651	0.431034
Colvin2.93	298	2.319	1.704	0.059	0.1681	0.0035	0	1004	22	1001	19	981	60	1001	19	0.298805	0.43122
Colvin2.127	546	2.268	2.134	0.085	0.1851	0.0043	0	1151	27	1094	23	1229	50	1094	23	4.95222	0.440917
Colvin2.19	501	2.234	2.597	0.076	0.2146	0.0041	0	1294	22	1253	22	1344	48	1344	48	6.77083	0.447628
Colvin2.109	188.7	2.156	2.6	0.082	0.2229	0.0045	0	1294	23	1296	24	1262	60	1262	60	2.69414	0.463822
Colvin2.53	157.6	2.093	2.635	0.083	0.2167	0.0046	0	1308	22	1263	24	1351	61	1351	61	6.51369	0.477783
Colvin2.67	580	2.051	2.147	0.081	0.1983	0.0058	0	1156	27	1164	31	1144	44	1164	31	0.692042	0.487567
Colvin2.98	372	2.046	4.03	0.1	0.2845	0.0054	0	1639	20	1613	27	1652	35	1652	35	2.36077	0.488759
Colvin2.16	312	2.017	2.085	0.083	0.1902	0.0046	0	1135	28	1121	25	1135	64	1121	25	1.23348	0.495786
Colvin2.106	235	1.953	1.657	0.061	0.1686	0.0035	0	986	23	1003	19	934	72	1003	19	1.72414	0.512033
Colvin2.31	297	1.95	2.074	0.072	0.188	0.0041	0	1137	23	1109	22	1144	70	1109	22	2.46262	0.512821
Colvin2.101	439	1.932	2.38	0.11	0.2026	0.0046	0	1222	33	1188	25	1265	58	1188	25	2.78232	0.517598
Colvin2.95	707	1.858	2.342	0.065	0.2069	0.0049	0	1220	19	1211	26	1233	45	1233	45	1.78427	0.538213
Colvin2.92	396	1.845	1.626	0.051	0.1607	0.0032	0	976	20	960	17	999	58	960	17	1.63934	0.542005
Colvin2.25	307.1	1.82	2.54	0.1	0.2101	0.005	0	1273	29	1228	27	1323	56	1323	56	7.18065	0.549451
Colvin2.2	291	1.808	2.65	0.072	0.2226	0.0054	0	1310	20	1294	28	1325	49	1325	49	2.33962	0.553097
Colvin2.35	709	1.791	2.102	0.051	0.1903	0.0037	0	1146	17	1122	20	1172	43	1122	20	2.09424	0.558347
Colvin2.119	216	1.779	2.132	0.072	0.1894	0.004	0	1153	23	1117	21	1190	68	1117	21	3.12229	0.562114
Colvin2.8	306	1.746	1.934	0.059	0.1827	0.0033	0	1088	20	1081	18	1068	65	1081	18	0.643382	0.572738
Colvin2.34	988	1.718	1.985	0.046	0.1794	0.0032	0	1107	16	1063	18	1178	41	1063	18	3.97471	0.582072
Colvin2.15	491	1.693	1.556	0.048	0.1521	0.0036	0	952	19	912	20	1041	53	912	20	4.20168	0.590667
Colvin2.61	559	1.689	1.727	0.056	0.1753	0.0039	0	1017	21	1041	21	951	45	1041	21	2.35988	0.592066
Colvin2.44	153	1.683	1.702	0.071	0.1612	0.0033	0	1005	26	963	18	1052	96	963	18	4.1791	0.594177
Colvin2.70	396	1.68	1.814	0.062	0.1708	0.0041	0	1045	22	1016	23	1079	69	1016	23	2.77512	0.595238
Colvin2.122	397	1.661	2.388	0.076	0.1989	0.0038	0	1233	23	1168	20	1328	49	1168	20	5.2717	0.602047
Colvin2.64	392	1.632	2.167	0.054	0.1986	0.0035	0	1167	17	1167	19	1150	45	1167	19	0	0.612745
Colvin2.3	151.2	1.628	1.531	0.073	0.1479	0.0036	0	932	30	888	20	970	100	888	20	4.72103	0.614251
Colvin2.73	498	1.624	1.99	0.065	0.1847	0.0037	0	1110	22	1095	21	1098	54	1095	21	1.35135	0.615764
Colvin2.75	186.4	1.6	2.246	0.084	0.2006	0.0046	0	1187	26	1177	25	1168	63	1177	25	0.84246	0.625
Colvin2.60	478	1.594	1.508	0.037	0.1544	0.0024	0	931	15	925	13	938	51	925	13	0.644468	0.627353
Colvin2.13	405	1.583	3.43	0.16	0.235	0.0054	0	1496	35	1359	28	1663	79	1663	79	18.2802	0.631712
Colvin2.115	224.6	1.571	3.111	0.091	0.2492	0.0049	0	1433	24	1433	25	1418	48	1418	48	1.05783	0.636537
Colvin2.121	360	1.557	1.852	0.056	0.1709	0.0031	0	1059	20	1019	18	1106	63	1019	18	3.77715	0.642261
Colvin2.89	198	1.526	1.674	0.056	0.1676	0.0041	0	997	22	998	23	952	80	998	23	0.100301	0.655308
Colvin2.104	403	1.514	3.358	0.084	0.2604	0.0052	0	1490	19	1490	27	1483	40	1483	40	0.472016	0.660502
Colvin2.9	236.4	1.473	1.959	0.08	0.1827	0.0033	0	1092	28	1081	18	1059	83	1081	18	1.00733	0.678887
Colvin2.79	128.5	1.46	2.584	0.09	0.2175	0.0052	0	1289	25	1267	27	1291	67	1291	67	1.85902	0.684932
Colvin2.62	413	1.441	3.309	0.078	0.2632	0.0043	0	1479	19	1505	22	1437	44	1437	44	4.73208	0.693963
Colvin2.55	82.3	1.428	2.4	0.12	0.2056	0.0056	0	1234	34	1204	30	1256	92	1256	92	4.14013	0.70028
Colvin2.72	707	1.392	2.726	0.084	0.2141	0.0056	0	1329	23	1249	30	1444	40	1444	40	13.5042	0.718391
Colvin2.54	222.1	1.384	1.601	0.057	0.1609	0.0038	0	965	22	961	21	980	74	961	21	0.414508	0.722543
Colvin2.114	170	1.378	2.656	0.094	0.2194	0.0047	0	1308	26	1277	25	1332	60	1332	60	4.12913	0.725689
Colvin2.28	1590	1.37	1.684	0.065	0.1388	0.0069	0	999	26	835	39	1267	45	835	39	16.4164	0.729927
Colvin2.57	1207	1.366	2.265	0.07	0.1651	0.0052	0	1195	22	984	29	1609	33	984	29	17.6569	0.732064
Colvin2.56	225	1.341	1.577	0.052	0.16	0.0034	0	956	20	956	19	937	79	956	19	0	0.745712
Colvin2.102	573	1.34	2.47	0.11	0.2037	0.0073	0	1248	34	1192	39	1332	40	1192	39	4.48718	0.746269
Colvin2.86	551	1.303	2.751	0.068	0.213	0.0049	0	1341	20	1248	25	1499	49	1499	49	16.7445	0.76746
Colvin2.71	115	1.295	1.615	0.09	0.1607	0.0051	0	968	33	959	28	930	120	959	28	0.929752	0.772201
Colvin2.113	67.7	1.295	1.84	0.11	0.1755	0.0046	0	1040	40	1041	25	980	140	1041	25	0.0961538	0.772201
Colvin2.125	844	1.285	2.923	0.058	0.2283	0.0046	0	1385	15	1324	24	1460	30	1460	30	9.31507	0.77821
Colvin2.107	199	1.282	2.164	0.074	0.1985	0.0035	0	1163	24	1166	19	1123	70	1166	19	0.257954	0.780031
Colvin2.6	363	1.255	2.959	0.072	0.2375	0.0048	0	1393	18	1372	25	1406	42	1406	42	2.41821	0.796813
Colvin2.39	166.8	1.239	1.635	0.073	0.1555	0.0038	0	974	28	931	21	1029	87	931	21	4.41478	0.807103
Colvin2.87	48.4	1.191	1.69	0.1	0.1617	0.0046	0	999	39	965	25	1000	140	965	25	3.4034	0.839631
Colvin2.7	365	1.181	2.642	0.071	0.2206	0.004	0	1311	21	1284	21	1343	46	1343	46	4.39315	0.84674
Colvin2.51	112.5	1.158	3.06	0.12	0.2302	0.0057	0	1413	30	1334	30	1530	79	1530	79	12.8105	0.863558
Colvin2.21	2120	1.142	1.542	0.044	0.1358	0.0055	0	944	18	819	31	1257	35	819	31	13.2415	0.875657
Colvin2.76	502.3	1.138	12.37	0.29	0.4811	0.0089	0	2627	22	2529	39	2674	24	2674	24	5.42259	0.878735
Colvin2.108	602	1.133	1.864	0.048	0.1747	0.0032	0	1065	17	1037	17	1106	42	1037	17	2.62911	0.882613
Colvin2.42	626	1.129	2.76	0.072	0.2212	0.0045	0	1343	19	1287	24	1407	33	1407	33	8.52878	0.88574
Colvin2.37	389	1.126	1.679	0.053	0.1603	0.0028	0	996	20	958	15	1047	60	958	15	3.81526	0.888099
Colvin2.94	182	1.105	2.88	0.12	0.2458	0.0065	0	1370	32	1415	33	1323	79	1323	79	6.95389	0.904977
Colvin2.4	449	1.083	3.235	0.087	0.2458	0.0039	0	1464	21	1416	20	1510	34	1510	34	6.22517	0.923361
Colvin2.123	362	1.066	3.813	0.099	0.2744	0.0046	0	1597	19	1562	23	1610	42	1610	42	2.98137	0.938086
Colvin2.26	91.5	1.03	2.14	0.1	0.1961	0.0045	0	1149	32	1153	24	1090	90	1153	24	0.348129	0.970874
Colvin2.58	260.7	1.006	1.725	0.056	0.1726	0.0034	0	1013	21	1026	19	964	68	1026	19	1.28332	0.994036
Colvin2.82	305	0.973	3.76	0.11	0.2732	0.0057	0	1579	23	1555	29	1580	45	1580	45	1.58228	1.02775
Colvin2.112	121.8	0.955	4.01	0.15	0.2855	0.0055	0	1627	29	1618	28	1617	62	1617	62	0.0618429	1.04712
Colvin2.91	1161	0.938	1.693	0.051	0.1543	0.006	0	1001	19	923	34	1181	39	923	34	7.79221	1.0661
Colvin2.40	115.3	0.928	3.22	0.11	0.2584	0.0056	0	1462	28	1480	28	1403	63	1403	63	5.48824	1.07759
Colvin2.41	804	0.899	2.82	0.069	0.2234	0.0037	0	1357	19	1302	19	1436	39	1436	39	9.33148	1.11235
Colvin2.116	1037	0.894	3.53	0.17	0.248	0.01	0	1515	42	1422	55	1675	27	1675	27	15.1045	1.11857
Colvin2.14	198.9	0.882	4.34	0.13	0.2891	0.0072	0	1699	24	1634	36	1757	50	1757	50	7.00057	1.13379
Colvin2.105	368	0.789	3.266	0.081	0.2519	0.0043	0	1469	19	1451	23	1490	44	1490	44	2.61745	1.26743
Colvin2.36	299	0.78	1.962	0.071	0.1753	0.0049	0	1096	24	1040	27	1188	67	1040	27	5.10949	1.28205
Colvin2.65	1582	0.773	1.201	0.036	0.1078	0.0054	0	798	16	658	31	1220	47	658	31	17.5439	1.29366
Colvin2.17	685	0.761	2.838	0.065	0.2211	0.0059	0	1362	17	1286	31	1455	43	1455	43	11.6151	1.31406
Colvin2.124	397	0.748	1.357	0.048	0.1374	0.003	0	869	21	829	17	935	70	829	17	4.60299	1.3369
Colvin2.68	148.2	0.674	1.693	0.07	0.1649	0.0045	0	1001	28	983	25	1028	72	983	25	1.7982	1.48368
Colvin2.80	67.7	0.666	1.41	0.1	0.1598	0.0051	0	882	45	954	28	620	160	954	28	8.16327	1.5015
Colvin2.11	1040	0.594	1.971	0.04	0.1597	0.0041	0	1103	14	954	23	1405	35	954	23	13.5086	1.6835
Colvin2.100	98.3	0.5647	1.677	0.078	0.1668	0.0045	0	994	29	993	25	950	100	993	25	0.100604	1.77085
Colvin2.88	338	0.528	11.55	0.3	0.4523	0.0096	0	2565	23	2402	42	2661	27	2661	27	9.73318	1.89394
Colvin2.85	12.94	0.0584	133.5	6.9	1.407	0.068	0	4954	52	5600	170	4712	41	4712	41	18.8455
Colvin2.1	243.5	1.011	2.336	0.095	0.1593	0.0033	0	1214	28	952	19	1693	64	DISC	DISC	21.5815
Colvin2.10	2492	1.612	1.822	0.035	0.1239	0.0037	0	1051	13	752	21	1733	36	DISC	DISC	28.4491
Colvin2.111	1500	3.629	5.41	0.34	0.1634	0.0061	0	1853	53	973	34	3102	45	DISC	DISC	47.4906
Colvin2.20	2027	1.086	1.035	0.028	0.0902	0.0035	0	719	14	556	20	1273	38	DISC	DISC	22.6704
Colvin2.23	34.2	0.055	222	12	2.161	0.097	0	5455	53	7350	190	4813	26	DISC	DISC	52.7114
Colvin2.29	815	1.118	2.85	0.12	0.2101	0.0047	0	1356	32	1228	25	1550	49	DISC	DISC	20.7742
Colvin2.48	3360	0.664	0.964	0.028	0.0837	0.0024	0	684	14	518	14	1358	39	DISC	DISC	24.269
Colvin2.63	24.6	0.1547	241.4	7.4	2.264	0.064	0	5564	31	7600	130	4905	29	DISC	DISC	54.9439
Colvin2.74	2850	4.45	1.041	0.061	0.0692	0.0036	0	720	29	431	22	1662	65	DISC	DISC	40.1389
Colvin2.77	3.31	0.1281	11.3	2.9	0.174	0.032	0	1900	270	980	160	0	4400	DISC	DISC	48.4211
Colvin2.97	4100	0.525	1.269	0.036	0.0998	0.0022	0	829	16	613	13	1459	31	DISC	DISC	26.0555
0	0	0	0	0	0	0	0	0	0	0	0	0	0	#DIV/0!	#DIV/0!	#DIV/0!	Core
0	0	0	0	0	0	0	0	0	0	0	0	0	0	#DIV/0!	#DIV/0!	#DIV/0!	Core
0	0	0	0	0	0	0	0	0	0	0	0	0	0	#DIV/0!	#DIV/0!	#DIV/0!	Core
0	0	0	0	0	0	0	0	0	0	0	0	0	0	#DIV/0!	#DIV/0!	#DIV/0!	Core
0	0	0	0	0	0	0	0	0	0	0	0	0	0	#DIV/0!	#DIV/0!	#DIV/0!	Core
0	0	0	0	0	0	0	0	0	0	0	0	0	0	#DIV/0!	#DIV/0!	#DIV/0!	Core
0	0	0	0	0	0	0	0	0	0	0	0	0	0	#DIV/0!	#DIV/0!	#DIV/0!	Core
0	0	0	0	0	0	0	0	0	0	0	0	0	0	#DIV/0!	#DIV/0!	#DIV/0!	Core
0	0	0	0	0	0	0	0	0	0	0	0	0	0	#DIV/0!	#DIV/0!	#DIV/0!	Core
0	0	0	0	0	0	0	0	0	0	0	0	0	0	#DIV/0!	#DIV/0!	#DIV/0!	Core
0	0	0	0	0	0	0	0	0	0	0	0	0	0	#DIV/0!	#DIV/0!	#DIV/0!	Core
0	0	0	0	0	0	0	0	0	0	0	0	0	0	#DIV/0!	#DIV/0!	#DIV/0!	Core
0	0	0	0	0	0	0	0	0	0	0	0	0	0	#DIV/0!	#DIV/0!	#DIV/0!	Core
0	0	0	0	0	0	0	0	0	0	0	0	0	0	#DIV/0!	#DIV/0!	#DIV/0!	Core
0	0	0	0	0	0	0	0	0	0	0	0	0	0	#DIV/0!	#DIV/0!	#DIV/0!	Core
0	0	0	0	0	0	0	0	0	0	0	0	0	0	#DIV/0!	#DIV/0!	#DIV/0!	Core
0	0	0	0	0	0	0	0	0	0	0	0	0	0	#DIV/0!	#DIV/0!	#DIV/0!	Core
0	0	0	0	0	0	0	0	0	0	0	0	0	0	#DIV/0!	#DIV/0!	#DIV/0!	Core
0	0	0	0	0	0	0	0	0	0	0	0	0	0	#DIV/0!	#DIV/0!	#DIV/0!	Core
0	0	0	0	0	0	0	0	0	0	0	0	0	0	#DIV/0!	#DIV/0!	#DIV/0!	Core
0	0	0	0	0	0	0	0	0	0	0	0	0	0	#DIV/0!	#DIV/0!	#DIV/0!	Core
0	0	0	0	0	0	0	0	0	0	0	0	0	0	#DIV/0!	#DIV/0!	#DIV/0!	Core
0	0	0	0	0	0	0	0	0	0	0	0	0	0	#DIV/0!	#DIV/0!	#DIV/0!	Core
0	0	0	0	0	0	0	0	0	0	0	0	0	0	#DIV/0!	#DIV/0!	#DIV/0!	Core
0	0	0	0	0	0	0	0	0	0	0	0	0	0	#DIV/0!	#DIV/0!	#DIV/0!	Core
0	0	0	0	0	0	0	0	0	0	0	0	0	0	#DIV/0!	#DIV/0!	#DIV/0!	Core
0	0	0	0	0	0	0	0	0	0	0	0	0	0	#DIV/0!	#DIV/0!	#DIV/0!	Core
0	0	0	0	0	0	0	0	0	0	0	0	0	0	#DIV/0!	#DIV/0!	#DIV/0!	Core
0	0	0	0	0	0	0	0	0	0	0	0	0	0	#DIV/0!	#DIV/0!	#DIV/0!	Core
0	0	0	0	0	0	0	0	0	0	0	0	0	0	#DIV/0!	#DIV/0!	#DIV/0!	Core
0	0	0	0	0	0	0	0	0	0	0	0	0	0	#DIV/0!	#DIV/0!	#DIV/0!	Core
0	0	0	0	0	0	0	0	0	0	0	0	0	0	#DIV/0!	#DIV/0!	#DIV/0!	Core
0	0	0	0	0	0	0	0	0	0	0	0	0	0	#DIV/0!	#DIV/0!	#DIV/0!	Core
0	0	0	0	0	0	0	0	0	0	0	0	0	0	#DIV/0!	#DIV/0!	#DIV/0!	Core
0	0	0	0	0	0	0	0	0	0	0	0	0	0	#DIV/0!	#DIV/0!	#DIV/0!	Core
0	0	0	0	0	0	0	0	0	0	0	0	0	0	#DIV/0!	#DIV/0!	#DIV/0!	Core
0	0	0	0	0	0	0	0	0	0	0	0	0	0	#DIV/0!	#DIV/0!	#DIV/0!	Core
0	0	0	0	0	0	0	0	0	0	0	0	0	0	#DIV/0!	#DIV/0!	#DIV/0!	Core
0	0	0	0	0	0	0	0	0	0	0	0	0	0	#DIV/0!	#DIV/0!	#DIV/0!	Core
0	0	0	0	0	0	0	0	0	0	0	0	0	0	#DIV/0!	#DIV/0!	#DIV/0!	Core
0	0	0	0	0	0	0	0	0	0	0	0	0	0	#DIV/0!	#DIV/0!	#DIV/0!	Core
0	0	0	0	0	0	0	0	0	0	0	0	0	0	#DIV/0!	#DIV/0!	#DIV/0!	Core
0	0	0	0	0	0	0	0	0	0	0	0	0	0	#DIV/0!	#DIV/0!	#DIV/0!	Core
0	0	0	0	0	0	0	0	0	0	0	0	0	0	#DIV/0!	#DIV/0!	#DIV/0!	Core
0	0	0	0	0	0	0	0	0	0	0	0	0	0	#DIV/0!	#DIV/0!	#DIV/0!	Core
0	0	0	0	0	0	0	0	0	0	0	0	0	0	#DIV/0!	#DIV/0!	#DIV/0!	Core
0	0	0	0	0	0	0	0	0	0	0	0	0	0	#DIV/0!	#DIV/0!	#DIV/0!	Core
0	0	0	0	0	0	0	0	0	0	0	0	0	0	#DIV/0!	#DIV/0!	#DIV/0!	Core
0	0	0	0	0	0	0	0	0	0	0	0	0	0	#DIV/0!	#DIV/0!	#DIV/0!	Core
0	0	0	0	0	0	0	0	0	0	0	0	0	0	#DIV/0!	#DIV/0!	#DIV/0!	Core
0	0	0	0	0	0	0	0	0	0	0	0	0	0	#DIV/0!	#DIV/0!	#DIV/0!	Core
0	0	0	0	0	0	0	0	0	0	0	0	0	0	#DIV/0!	#DIV/0!	#DIV/0!	Core
0	0	0	0	0	0	0	0	0	0	0	0	0	0	#DIV/0!	#DIV/0!	#DIV/0!	Core
0	0	0	0	0	0	0	0	0	0	0	0	0	0	#DIV/0!	#DIV/0!	#DIV/0!	Core
0	0	0	0	0	0	0	0	0	0	0	0	0	0	#DIV/0!	#DIV/0!	#DIV/0!	Core
0	0	0	0	0	0	0	0	0	0	0	0	0	0	#DIV/0!	#DIV/0!	#DIV/0!	Core
0	0	0	0	0	0	0	0	0	0	0	0	0	0	#DIV/0!	#DIV/0!	#DIV/0!	Core
0	0	0	0	0	0	0	0	0	0	0	0	0	0	#DIV/0!	#DIV/0!	#DIV/0!	Core
0	0	0	0	0	0	0	0	0	0	0	0	0	0	#DIV/0!	#DIV/0!	#DIV/0!	Core
0	0	0	0	0	0	0	0	0	0	0	0	0	0	#DIV/0!	#DIV/0!	#DIV/0!	Core
0	0	0	0	0	0	0	0	0	0	0	0	0	0	#DIV/0!	#DIV/0!	#DIV/0!	Core
0	0	0	0	0	0	0	0	0	0	0	0	0	0	#DIV/0!	#DIV/0!	#DIV/0!	Core
0	0	0	0	0	0	0	0	0	0	0	0	0	0	#DIV/0!	#DIV/0!	#DIV/0!	Core
0	0	0	0	0	0	0	0	0	0	0	0	0	0	#DIV/0!	#DIV/0!	#DIV/0!	Core
0	0	0	0	0	0	0	0	0	0	0	0	0	0	#DIV/0!	#DIV/0!	#DIV/0!	Core
0	0	0	0	0	0	0	0	0	0	0	0	0	0	#DIV/0!	#DIV/0!	#DIV/0!	Core
0	0	0	0	0	0	0	0	0	0	0	0	0	0	#DIV/0!	#DIV/0!	#DIV/0!	Core
0	0	0	0	0	0	0	0	0	0	0	0	0	0	#DIV/0!	#DIV/0!	#DIV/0!	Core
0	0	0	0	0	0	0	0	0	0	0	0	0	0	#DIV/0!	#DIV/0!	#DIV/0!	Core
0	0	0	0	0	0	0	0	0	0	0	0	0	0	#DIV/0!	#DIV/0!	#DIV/0!	Core
0	0	0	0	0	0	0	0	0	0	0	0	0	0	#DIV/0!	#DIV/0!	#DIV/0!	Core
0	0	0	0	0	0	0	0	0	0	0	0	0	0	#DIV/0!	#DIV/0!	#DIV/0!	Core
0	0	0	0	0	0	0	0	0	0	0	0	0	0	#DIV/0!	#DIV/0!	#DIV/0!	Core
0	0	0	0	0	0	0	0	0	0	0	0	0	0	#DIV/0!	#DIV/0!	#DIV/0!	Core
0	0	0	0	0	0	0	0	0	0	0	0	0	0	#DIV/0!	#DIV/0!	#DIV/0!	Core
0	0	0	0	0	0	0	0	0	0	0	0	0	0	#DIV/0!	#DIV/0!	#DIV/0!	Core
0	0	0	0	0	0	0	0	0	0	0	0	0	0	#DIV/0!	#DIV/0!	#DIV/0!	Core
0	0	0	0	0	0	0	0	0	0	0	0	0	0	#DIV/0!	#DIV/0!	#DIV/0!	Core
0	0	0	0	0	0	0	0	0	0	0	0	0	0	#DIV/0!	#DIV/0!	#DIV/0!	Core
0	0	0	0	0	0	0	0	0	0	0	0	0	0	#DIV/0!	#DIV/0!	#DIV/0!	Core
0	0	0	0	0	0	0	0	0	0	0	0	0	0	#DIV/0!	#DIV/0!	#DIV/0!	Core
0	0	0	0	0	0	0	0	0	0	0	0	0	0	#DIV/0!	#DIV/0!	#DIV/0!	Core
0	0	0	0	0	0	0	0	0	0	0	0	0	0	#DIV/0!	#DIV/0!	#DIV/0!	Core
0	0	0	0	0	0	0	0	0	0	0	0	0	0	#DIV/0!	#DIV/0!	#DIV/0!	Core
0	0	0	0	0	0	0	0	0	0	0	0	0	0	#DIV/0!	#DIV/0!	#DIV/0!	Core
0	0	0	0	0	0	0	0	0	0	0	0	0	0	#DIV/0!	#DIV/0!	#DIV/0!	Core
0	0	0	0	0	0	0	0	0	0	0	0	0	0	#DIV/0!	#DIV/0!	#DIV/0!	Core
0	0	0	0	0	0	0	0	0	0	0	0	0	0	#DIV/0!	#DIV/0!	#DIV/0!	Core
0	0	0	0	0	0	0	0	0	0	0	0	0	0	#DIV/0!	#DIV/0!	#DIV/0!	Core
0	0	0	0	0	0	0	0	0	0	0	0	0	0	#DIV/0!	#DIV/0!	#DIV/0!	Core
0	0	0	0	0	0	0	0	0	0	0	0	0	0	#DIV/0!	#DIV/0!	#DIV/0!	Core
0	0	0	0	0	0	0	0	0	0	0	0	0	0	#DIV/0!	#DIV/0!	#DIV/0!	Core
0	0	0	0	0	0	0	0	0	0	0	0	0	0	#DIV/0!	#DIV/0!	#DIV/0!	Core
0	0	0	0	0	0	0	0	0	0	0	0	0	0	#DIV/0!	#DIV/0!	#DIV/0!	Core
0	0	0	0	0	0	0	0	0	0	0	0	0	0	#DIV/0!	#DIV/0!	#DIV/0!	Core
0	0	0	0	0	0	0	0	0	0	0	0	0	0	#DIV/0!	#DIV/0!	#DIV/0!	Core
0	0	0	0	0	0	0	0	0	0	0	0	0	0	#DIV/0!	#DIV/0!	#DIV/0!	Core
0	0	0	0	0	0	0	0	0	0	0	0	0	0	#DIV/0!	#DIV/0!	#DIV/0!	Core
0	0	0	0	0	0	0	0	0	0	0	0	0	0	#DIV/0!	#DIV/0!	#DIV/0!	Core
0	0	0	0	0	0	0	0	0	0	0	0	0	0	#DIV/0!	#DIV/0!	#DIV/0!	Core
0	0	0	0	0	0	0	0	0	0	0	0	0	0	#DIV/0!	#DIV/0!	#DIV/0!	Core
0	0	0	0	0	0	0	0	0	0	0	0	0	0	#DIV/0!	#DIV/0!	#DIV/0!	Core
0	0	0	0	0	0	0	0	0	0	0	0	0	0	#DIV/0!	#DIV/0!	#DIV/0!	Core
0	0	0	0	0	0	0	0	0	0	0	0	0	0	#DIV/0!	#DIV/0!	#DIV/0!	Core
0	0	0	0	0	0	0	0	0	0	0	0	0	0	#DIV/0!	#DIV/0!	#DIV/0!	Core
0	0	0	0	0	0	0	0	0	0	0	0	0	0	#DIV/0!	#DIV/0!	#DIV/0!	Core
0	0	0	0	0	0	0	0	0	0	0	0	0	0	#DIV/0!	#DIV/0!	#DIV/0!	Core
0	0	0	0	0	0	0	0	0	0	0	0	0	0	#DIV/0!	#DIV/0!	#DIV/0!	Core
0	0	0	0	0	0	0	0	0	0	0	0	0	0	#DIV/0!	#DIV/0!	#DIV/0!	Core
0	0	0	0	0	0	0	0	0	0	0	0	0	0	#DIV/0!	#DIV/0!	#DIV/0!	Core
0	0	0	0	0	0	0	0	0	0	0	0	0	0	#DIV/0!	#DIV/0!	#DIV/0!	Core
0	0	0	0	0	0	0	0	0	0	0	0	0	0	#DIV/0!	#DIV/0!	#DIV/0!	Core
0	0	0	0	0	0	0	0	0	0	0	0	0	0	#DIV/0!	#DIV/0!	#DIV/0!	Core
0	0	0	0	0	0	0	0	0	0	0	0	0	0	#DIV/0!	#DIV/0!	#DIV/0!	Core
0	0	0	0	0	0	0	0	0	0	0	0	0	0	#DIV/0!	#DIV/0!	#DIV/0!	Core
0	0	0	0	0	0	0	0	0	0	0	0	0	0	#DIV/0!	#DIV/0!	#DIV/0!	Core
0	0	0	0	0	0	0	0	0	0	0	0	0	0	#DIV/0!	#DIV/0!	#DIV/0!	Core
0	0	0	0	0	0	0	0	0	0	0	0	0	0	#DIV/0!	#DIV/0!	#DIV/0!	Core
0	0	0	0	0	0	0	0	0	0	0	0	0	0	#DIV/0!	#DIV/0!	#DIV/0!	Core
0	0	0	0	0	0	0	0	0	0	0	0	0	0	#DIV/0!	#DIV/0!	#DIV/0!	Core
0	0	0	0	0	0	0	0	0	0	0	0	0	0	#DIV/0!	#DIV/0!	#DIV/0!	Core
0	0	0	0	0	0	0	0	0	0	0	0	0	0	#DIV/0!	#DIV/0!	#DIV/0!	Core
0	0	0	0	0	0	0	0	0	0	0	0	0	0	#DIV/0!	#DIV/0!	#DIV/0!	Core
0	0	0	0	0	0	0	0	0	0	0	0	0	0	#DIV/0!	#DIV/0!	#DIV/0!	Core
0	0	0	0	0	0	0	0	0	0	0	0	0	0	#DIV/0!	#DIV/0!	#DIV/0!	Core
0	0	0	0	0	0	0	0	0	0	0	0	0	0	#DIV/0!	#DIV/0!	#DIV/0!	Core
0	0	0	0	0	0	0	0	0	0	0	0	0	0	#DIV/0!	#DIV/0!	#DIV/0!	Core
0	0	0	0	0	0	0	0	0	0	0	0	0	0	#DIV/0!	#DIV/0!	#DIV/0!	Core
0	0	0	0	0	0	0	0	0	0	0	0	0	0	#DIV/0!	#DIV/0!	#DIV/0!	Core
0	0	0	0	0	0	0	0	0	0	0	0	0	0	#DIV/0!	#DIV/0!	#DIV/0!	Core
0	0	0	0	0	0	0	0	0	0	0	0	0	0	#DIV/0!	#DIV/0!	#DIV/0!	Core
0	0	0	0	0	0	0	0	0	0	0	0	0	0	#DIV/0!	#DIV/0!	#DIV/0!	Core
0	0	0	0	0	0	0	0	0	0	0	0	0	0	#DIV/0!	#DIV/0!	#DIV/0!	Core
0	0	0	0	0	0	0	0	0	0	0	0	0	0	#DIV/0!	#DIV/0!	#DIV/0!	Core
0	0	0	0	0	0	0	0	0	0	0	0	0	0	#DIV/0!	#DIV/0!	#DIV/0!	Core
0	0	0	0	0	0	0	0	0	0	0	0	0	0	#DIV/0!	#DIV/0!	#DIV/0!	Core
0	0	0	0	0	0	0	0	0	0	0	0	0	0	#DIV/0!	#DIV/0!	#DIV/0!	Core
0	0	0	0	0	0	0	0	0	0	0	0	0	0	#DIV/0!	#DIV/0!	#DIV/0!	Core
0	0	0	0	0	0	0	0	0	0	0	0	0	0	#DIV/0!	#DIV/0!	#DIV/0!	Core
0	0	0	0	0	0	0	0	0	0	0	0	0	0	#DIV/0!	#DIV/0!	#DIV/0!	Core
0	0	0	0	0	0	0	0	0	0	0	0	0	0	#DIV/0!	#DIV/0!	#DIV/0!	Core
0	0	0	0	0	0	0	0	0	0	0	0	0	0	#DIV/0!	#DIV/0!	#DIV/0!	Core
0	0	0	0	0	0	0	0	0	0	0	0	0	0	#DIV/0!	#DIV/0!	#DIV/0!	Core
0	0	0	0	0	0	0	0	0	0	0	0	0	0	#DIV/0!	#DIV/0!	#DIV/0!	Core
0	0	0	0	0	0	0	0	0	0	0	0	0	0	#DIV/0!	#DIV/0!	#DIV/0!	Core
0	0	0	0	0	0	0	0	0	0	0	0	0	0	#DIV/0!	#DIV/0!	#DIV/0!	Core
0	0	0	0	0	0	0	0	0	0	0	0	0	0	#DIV/0!	#DIV/0!	#DIV/0!	Core
0	0	0	0	0	0	0	0	0	0	0	0	0	0	#DIV/0!	#DIV/0!	#DIV/0!	Core
0	0	0	0	0	0	0	0	0	0	0	0	0	0	#DIV/0!	#DIV/0!	#DIV/0!	Core
0	0	0	0	0	0	0	0	0	0	0	0	0	0	#DIV/0!	#DIV/0!	#DIV/0!	Core
0	0	0	0	0	0	0	0	0	0	0	0	0	0	#DIV/0!	#DIV/0!	#DIV/0!	Core
0	0	0	0	0	0	0	0	0	0	0	0	0	0	#DIV/0!	#DIV/0!	#DIV/0!	Core
0	0	0	0	0	0	0	0	0	0	0	0	0	0	#DIV/0!	#DIV/0!	#DIV/0!	Core
0	0	0	0	0	0	0	0	0	0	0	0	0	0	#DIV/0!	#DIV/0!	#DIV/0!	Core
0	0	0	0	0	0	0	0	0	0	0	0	0	0	#DIV/0!	#DIV/0!	#DIV/0!	Core
0	0	0	0	0	0	0	0	0	0	0	0	0	0	#DIV/0!	#DIV/0!	#DIV/0!	Core
0	0	0	0	0	0	0	0	0	0	0	0	0	0	#DIV/0!	#DIV/0!	#DIV/0!	Core
0	0	0	0	0	0	0	0	0	0	0	0	0	0	#DIV/0!	#DIV/0!	#DIV/0!	Core
0	0	0	0	0	0	0	0	0	0	0	0	0	0	#DIV/0!	#DIV/0!	#DIV/0!	Core
0	0	0	0	0	0	0	0	0	0	0	0	0	0	#DIV/0!	#DIV/0!	#DIV/0!	Core
0	0	0	0	0	0	0	0	0	0	0	0	0	0	#DIV/0!	#DIV/0!	#DIV/0!	Core
0	0	0	0	0	0	0	0	0	0	0	0	0	0	#DIV/0!	#DIV/0!	#DIV/0!	Core
0	0	0	0	0	0	0	0	0	0	0	0	0	0	#DIV/0!	#DIV/0!	#DIV/0!	Core
0	0	0	0	0	0	0	0	0	0	0	0	0	0	#DIV/0!	#DIV/0!	#DIV/0!	Core
0	0	0	0	0	0	0	0	0	0	0	0	0	0	#DIV/0!	#DIV/0!	#DIV/0!	Core
0	0	0	0	0	0	0	0	0	0	0	0	0	0	#DIV/0!	#DIV/0!	#DIV/0!	Core
0	0	0	0	0	0	0	0	0	0	0	0	0	0	#DIV/0!	#DIV/0!	#DIV/0!	Core
0	0	0	0	0	0	0	0	0	0	0	0	0	0	#DIV/0!	#DIV/0!	#DIV/0!	Core
0	0	0	0	0	0	0	0	0	0	0	0	0	0	#DIV/0!	#DIV/0!	#DIV/0!	Core
0	0	0	0	0	0	0	0	0	0	0	0	0	0	#DIV/0!	#DIV/0!	#DIV/0!	Core
0	0	0	0	0	0	0	0	0	0	0	0	0	0	#DIV/0!	#DIV/0!	#DIV/0!	Core
0	0	0	0	0	0	0	0	0	0	0	0	0	0	#DIV/0!	#DIV/0!	#DIV/0!	Core
0	0	0	0	0	0	0	0	0	0	0	0	0	0	#DIV/0!	#DIV/0!	#DIV/0!	Core
0	0	0	0	0	0	0	0	0	0	0	0	0	0	#DIV/0!	#DIV/0!	#DIV/0!	Core
0	0	0	0	0	0	0	0	0	0	0	0	0	0	#DIV/0!	#DIV/0!	#DIV/0!	Core
0	0	0	0	0	0	0	0	0	0	0	0	0	0	#DIV/0!	#DIV/0!	#DIV/0!	Core
0	0	0	0	0	0	0	0	0	0	0	0	0	0	#DIV/0!	#DIV/0!	#DIV/0!	Core
0	0	0	0	0	0	0	0	0	0	0	0	0	0	#DIV/0!	#DIV/0!	#DIV/0!	Core
0	0	0	0	0	0	0	0	0	0	0	0	0	0	#DIV/0!	#DIV/0!	#DIV/0!	Core
0	0	0	0	0	0	0	0	0	0	0	0	0	0	#DIV/0!	#DIV/0!	#DIV/0!	Core
0	0	0	0	0	0	0	0	0	0	0	0	0	0	#DIV/0!	#DIV/0!	#DIV/0!	Core
0	0	0	0	0	0	0	0	0	0	0	0	0	0	#DIV/0!	#DIV/0!	#DIV/0!	Core
0	0	0	0	0	0	0	0	0	0	0	0	0	0	#DIV/0!	#DIV/0!	#DIV/0!	Core
0	0	0	0	0	0	0	0	0	0	0	0	0	0	#DIV/0!	#DIV/0!	#DIV/0!	Core
0	0	0	0	0	0	0	0	0	0	0	0	0	0	#DIV/0!	#DIV/0!	#DIV/0!	Core
0	0	0	0	0	0	0	0	0	0	0	0	0	0	#DIV/0!	#DIV/0!	#DIV/0!	Core
0	0	0	0	0	0	0	0	0	0	0	0	0	0	#DIV/0!	#DIV/0!	#DIV/0!	Core
0	0	0	0	0	0	0	0	0	0	0	0	0	0	#DIV/0!	#DIV/0!	#DIV/0!	Core
0	0	0	0	0	0	0	0	0	0	0	0	0	0	#DIV/0!	#DIV/0!	#DIV/0!	Core
0	0	0	0	0	0	0	0	0	0	0	0	0	0	#DIV/0!	#DIV/0!	#DIV/0!	Core
0	0	0	0	0	0	0	0	0	0	0	0	0	0	#DIV/0!	#DIV/0!	#DIV/0!	Core
0	0	0	0	0	0	0	0	0	0	0	0	0	0	#DIV/0!	#DIV/0!	#DIV/0!	Core
0	0	0	0	0	0	0	0	0	0	0	0	0	0	#DIV/0!	#DIV/0!	#DIV/0!	Core
0	0	0	0	0	0	0	0	0	0	0	0	0	0	#DIV/0!	#DIV/0!	#DIV/0!	Core
0	0	0	0	0	0	0	0	0	0	0	0	0	0	#DIV/0!	#DIV/0!	#DIV/0!	Core
0	0	0	0	0	0	0	0	0	0	0	0	0	0	#DIV/0!	#DIV/0!	#DIV/0!	Core
0	0	0	0	0	0	0	0	0	0	0	0	0	0	#DIV/0!	#DIV/0!	#DIV/0!	Core
0	0	0	0	0	0	0	0	0	0	0	0	0	0	#DIV/0!	#DIV/0!	#DIV/0!	Core
0	0	0	0	0	0	0	0	0	0	0	0	0	0	#DIV/0!	#DIV/0!	#DIV/0!	Core
0	0	0	0	0	0	0	0	0	0	0	0	0	0	#DIV/0!	#DIV/0!	#DIV/0!	Core
0	0	0	0	0	0	0	0	0	0	0	0	0	0	#DIV/0!	#DIV/0!	#DIV/0!	Core
0	0	0	0	0	0	0	0	0	0	0	0	0	0	#DIV/0!	#DIV/0!	#DIV/0!	Core
0	0	0	0	0	0	0	0	0	0	0	0	0	0	#DIV/0!	#DIV/0!	#DIV/0!	Core
0	0	0	0	0	0	0	0	0	0	0	0	0	0	#DIV/0!	#DIV/0!	#DIV/0!	Core
0	0	0	0	0	0	0	0	0	0	0	0	0	0	#DIV/0!	#DIV/0!	#DIV/0!	Core
0	0	0	0	0	0	0	0	0	0	0	0	0	0	#DIV/0!	#DIV/0!	#DIV/0!	Core
0	0	0	0	0	0	0	0	0	0	0	0	0	0	#DIV/0!	#DIV/0!	#DIV/0!	Core
0	0	0	0	0	0	0	0	0	0	0	0	0	0	#DIV/0!	#DIV/0!	#DIV/0!	Core
0	0	0	0	0	0	0	0	0	0	0	0	0	0	#DIV/0!	#DIV/0!	#DIV/0!	Core
0	0	0	0	0	0	0	0	0	0	0	0	0	0	#DIV/0!	#DIV/0!	#DIV/0!	Core
0	0	0	0	0	0	0	0	0	0	0	0	0	0	#DIV/0!	#DIV/0!	#DIV/0!	Core
0	0	0	0	0	0	0	0	0	0	0	0	0	0	#DIV/0!	#DIV/0!	#DIV/0!	Core
0	0	0	0	0	0	0	0	0	0	0	0	0	0	#DIV/0!	#DIV/0!	#DIV/0!	Core
0	0	0	0	0	0	0	0	0	0	0	0	0	0	#DIV/0!	#DIV/0!	#DIV/0!	Core
0	0	0	0	0	0	0	0	0	0	0	0	0	0	#DIV/0!	#DIV/0!	#DIV/0!	Core
0	0	0	0	0	0	0	0	0	0	0	0	0	0	#DIV/0!	#DIV/0!	#DIV/0!	Core
0	0	0	0	0	0	0	0	0	0	0	0	0	0	#DIV/0!	#DIV/0!	#DIV/0!	Core
0	0	0	0	0	0	0	0	0	0	0	0	0	0	#DIV/0!	#DIV/0!	#DIV/0!	Core
0	0	0	0	0	0	0	0	0	0	0	0	0	0	#DIV/0!	#DIV/0!	#DIV/0!	Core
0	0	0	0	0	0	0	0	0	0	0	0	0	0	#DIV/0!	#DIV/0!	#DIV/0!	Core
0	0	0	0	0	0	0	0	0	0	0	0	0	0	#DIV/0!	#DIV/0!	#DIV/0!	Core
0	0	0	0	0	0	0	0	0	0	0	0	0	0	#DIV/0!	#DIV/0!	#DIV/0!	Core
0	0	0	0	0	0	0	0	0	0	0	0	0	0	#DIV/0!	#DIV/0!	#DIV/0!	Core
0	0	0	0	0	0	0	0	0	0	0	0	0	0	#DIV/0!	#DIV/0!	#DIV/0!	Core
0	0	0	0	0	0	0	0	0	0	0	0	0	0	#DIV/0!	#DIV/0!	#DIV/0!	Core
0	0	0	0	0	0	0	0	0	0	0	0	0	0	#DIV/0!	#DIV/0!	#DIV/0!	Core
0	0	0	0	0	0	0	0	0	0	0	0	0	0	#DIV/0!	#DIV/0!	#DIV/0!	Core
0	0	0	0	0	0	0	0	0	0	0	0	0	0	#DIV/0!	#DIV/0!	#DIV/0!	Core
0	0	0	0	0	0	0	0	0	0	0	0	0	0	#DIV/0!	#DIV/0!	#DIV/0!	Core
0	0	0	0	0	0	0	0	0	0	0	0	0	0	#DIV/0!	#DIV/0!	#DIV/0!	Core
0	0	0	0	0	0	0	0	0	0	0	0	0	0	#DIV/0!	#DIV/0!	#DIV/0!	Core
0	0	0	0	0	0	0	0	0	0	0	0	0	0	#DIV/0!	#DIV/0!	#DIV/0!	Core
0	0	0	0	0	0	0	0	0	0	0	0	0	0	#DIV/0!	#DIV/0!	#DIV/0!	Core
0	0	0	0	0	0	0	0	0	0	0	0	0	0	#DIV/0!	#DIV/0!	#DIV/0!	Core
0	0	0	0	0	0	0	0	0	0	0	0	0	0	#DIV/0!	#DIV/0!	#DIV/0!	Core
0	0	0	0	0	0	0	0	0	0	0	0	0	0	#DIV/0!	#DIV/0!	#DIV/0!	Core
0	0	0	0	0	0	0	0	0	0	0	0	0	0	#DIV/0!	#DIV/0!	#DIV/0!	Core
0	0	0	0	0	0	0	0	0	0	0	0	0	0	#DIV/0!	#DIV/0!	#DIV/0!	Core
0	0	0	0	0	0	0	0	0	0	0	0	0	0	#DIV/0!	#DIV/0!	#DIV/0!	Core
0	0	0	0	0	0	0	0	0	0	0	0	0	0	#DIV/0!	#DIV/0!	#DIV/0!	Core
0	0	0	0	0	0	0	0	0	0	0	0	0	0	#DIV/0!	#DIV/0!	#DIV/0!	Core
0	0	0	0	0	0	0	0	0	0	0	0	0	0	#DIV/0!	#DIV/0!	#DIV/0!	Core
0	0	0	0	0	0	0	0	0	0	0	0	0	0	#DIV/0!	#DIV/0!	#DIV/0!	Core
0	0	0	0	0	0	0	0	0	0	0	0	0	0	#DIV/0!	#DIV/0!	#DIV/0!	Core
0	0	0	0	0	0	0	0	0	0	0	0	0	0	#DIV/0!	#DIV/0!	#DIV/0!	Core
0	0	0	0	0	0	0	0	0	0	0	0	0	0	#DIV/0!	#DIV/0!	#DIV/0!	Core
0	0	0	0	0	0	0	0	0	0	0	0	0	0	#DIV/0!	#DIV/0!	#DIV/0!	Core
0	0	0	0	0	0	0	0	0	0	0	0	0	0	#DIV/0!	#DIV/0!	#DIV/0!	Core
0	0	0	0	0	0	0	0	0	0	0	0	0	0	#DIV/0!	#DIV/0!	#DIV/0!	Core
0	0	0	0	0	0	0	0	0	0	0	0	0	0	#DIV/0!	#DIV/0!	#DIV/0!	Core
0	0	0	0	0	0	0	0	0	0	0	0	0	0	#DIV/0!	#DIV/0!	#DIV/0!	Core
0	0	0	0	0	0	0	0	0	0	0	0	0	0	#DIV/0!	#DIV/0!	#DIV/0!	Core
0	0	0	0	0	0	0	0	0	0	0	0	0	0	#DIV/0!	#DIV/0!	#DIV/0!	Core
0	0	0	0	0	0	0	0	0	0	0	0	0	0	#DIV/0!	#DIV/0!	#DIV/0!	Core
0	0	0	0	0	0	0	0	0	0	0	0	0	0	#DIV/0!	#DIV/0!	#DIV/0!	Core
0	0	0	0	0	0	0	0	0	0	0	0	0	0	#DIV/0!	#DIV/0!	#DIV/0!	Core
0	0	0	0	0	0	0	0	0	0	0	0	0	0	#DIV/0!	#DIV/0!	#DIV/0!	Core
0	0	0	0	0	0	0	0	0	0	0	0	0	0	#DIV/0!	#DIV/0!	#DIV/0!	Core
0	0	0	0	0	0	0	0	0	0	0	0	0	0	#DIV/0!	#DIV/0!	#DIV/0!	Core
0	0	0	0	0	0	0	0	0	0	0	0	0	0	#DIV/0!	#DIV/0!	#DIV/0!	Core
0	0	0	0	0	0	0	0	0	0	0	0	0	0	#DIV/0!	#DIV/0!	#DIV/0!	Core
0	0	0	0	0	0	0	0	0	0	0	0	0	0	#DIV/0!	#DIV/0!	#DIV/0!	Core
0	0	0	0	0	0	0	0	0	0	0	0	0	0	#DIV/0!	#DIV/0!	#DIV/0!	Core
0	0	0	0	0	0	0	0	0	0	0	0	0	0	#DIV/0!	#DIV/0!	#DIV/0!	Core
0	0	0	0	0	0	0	0	0	0	0	0	0	0	#DIV/0!	#DIV/0!	#DIV/0!	Core
0	0	0	0	0	0	0	0	0	0	0	0	0	0	#DIV/0!	#DIV/0!	#DIV/0!	Core
0	0	0	0	0	0	0	0	0	0	0	0	0	0	#DIV/0!	#DIV/0!	#DIV/0!	Core
0	0	0	0	0	0	0	0	0	0	0	0	0	0	#DIV/0!	#DIV/0!	#DIV/0!	Core
0	0	0	0	0	0	0	0	0	0	0	0	0	0	#DIV/0!	#DIV/0!	#DIV/0!	Core
0	0	0	0	0	0	0	0	0	0	0	0	0	0	#DIV/0!	#DIV/0!	#DIV/0!	Core
0	0	0	0	0	0	0	0	0	0	0	0	0	0	#DIV/0!	#DIV/0!	#DIV/0!	Core
0	0	0	0	0	0	0	0	0	0	0	0	0	0	#DIV/0!	#DIV/0!	#DIV/0!	Core
0	0	0	0	0	0	0	0	0	0	0	0	0	0	#DIV/0!	#DIV/0!	#DIV/0!	Core
0	0	0	0	0	0	0	0	0	0	0	0	0	0	#DIV/0!	#DIV/0!	#DIV/0!	Core
0	0	0	0	0	0	0	0	0	0	0	0	0	0	#DIV/0!	#DIV/0!	#DIV/0!	Core
0	0	0	0	0	0	0	0	0	0	0	0	0	0	#DIV/0!	#DIV/0!	#DIV/0!	Core
0	0	0	0	0	0	0	0	0	0	0	0	0	0	#DIV/0!	#DIV/0!	#DIV/0!	Core
0	0	0	0	0	0	0	0	0	0	0	0	0	0	#DIV/0!	#DIV/0!	#DIV/0!	Core
0	0	0	0	0	0	0	0	0	0	0	0	0	0	#DIV/0!	#DIV/0!	#DIV/0!	Core
0	0	0	0	0	0	0	0	0	0	0	0	0	0	#DIV/0!	#DIV/0!	#DIV/0!	Core
0	0	0	0	0	0	0	0	0	0	0	0	0	0	#DIV/0!	#DIV/0!	#DIV/0!	Core
0	0	0	0	0	0	0	0	0	0	0	0	0	0	#DIV/0!	#DIV/0!	#DIV/0!	Core
0	0	0	0	0	0	0	0	0	0	0	0	0	0	#DIV/0!	#DIV/0!	#DIV/0!	Core
0	0	0	0	0	0	0	0	0	0	0	0	0	0	#DIV/0!	#DIV/0!	#DIV/0!	Core
0	0	0	0	0	0	0	0	0	0	0	0	0	0	#DIV/0!	#DIV/0!	#DIV/0!	Core
0	0	0	0	0	0	0	0	0	0	0	0	0	0	#DIV/0!	#DIV/0!	#DIV/0!	Core
0	0	0	0	0	0	0	0	0	0	0	0	0	0	#DIV/0!	#DIV/0!	#DIV/0!	Core
0	0	0	0	0	0	0	0	0	0	0	0	0	0	#DIV/0!	#DIV/0!	#DIV/0!	Core
0	0	0	0	0	0	0	0	0	0	0	0	0	0	#DIV/0!	#DIV/0!	#DIV/0!	Core
0	0	0	0	0	0	0	0	0	0	0	0	0	0	#DIV/0!	#DIV/0!	#DIV/0!	Core
0	0	0	0	0	0	0	0	0	0	0	0	0	0	#DIV/0!	#DIV/0!	#DIV/0!	Core
0	0	0	0	0	0	0	0	0	0	0	0	0	0	#DIV/0!	#DIV/0!	#DIV/0!	Core
0	0	0	0	0	0	0	0	0	0	0	0	0	0	#DIV/0!	#DIV/0!	#DIV/0!	Core
0	0	0	0	0	0	0	0	0	0	0	0	0	0	#DIV/0!	#DIV/0!	#DIV/0!	Core
0	0	0	0	0	0	0	0	0	0	0	0	0	0	#DIV/0!	#DIV/0!	#DIV/0!	Core
0	0	0	0	0	0	0	0	0	0	0	0	0	0	#DIV/0!	#DIV/0!	#DIV/0!	Core
0	0	0	0	0	0	0	0	0	0	0	0	0	0	#DIV/0!	#DIV/0!	#DIV/0!	Core
0	0	0	0	0	0	0	0	0	0	0	0	0	0	#DIV/0!	#DIV/0!	#DIV/0!	Core
0	0	0	0	0	0	0	0	0	0	0	0	0	0	#DIV/0!	#DIV/0!	#DIV/0!	Core
0	0	0	0	0	0	0	0	0	0	0	0	0	0	#DIV/0!	#DIV/0!	#DIV/0!	Core
0	0	0	0	0	0	0	0	0	0	0	0	0	0	#DIV/0!	#DIV/0!	#DIV/0!	Core
0	0	0	0	0	0	0	0	0	0	0	0	0	0	#DIV/0!	#DIV/0!	#DIV/0!	Core
0	0	0	0	0	0	0	0	0	0	0	0	0	0	#DIV/0!	#DIV/0!	#DIV/0!	Core
0	0	0	0	0	0	0	0	0	0	0	0	0	0	#DIV/0!	#DIV/0!	#DIV/0!	Core
0	0	0	0	0	0	0	0	0	0	0	0	0	0	#DIV/0!	#DIV/0!	#DIV/0!	Core
0	0	0	0	0	0	0	0	0	0	0	0	0	0	#DIV/0!	#DIV/0!	#DIV/0!	Core
0	0	0	0	0	0	0	0	0	0	0	0	0	0	#DIV/0!	#DIV/0!	#DIV/0!	Core
0	0	0	0	0	0	0	0	0	0	0	0	0	0	#DIV/0!	#DIV/0!	#DIV/0!	Core
0	0	0	0	0	0	0	0	0	0	0	0	0	0	#DIV/0!	#DIV/0!	#DIV/0!	Core
0	0	0	0	0	0	0	0	0	0	0	0	0	0	#DIV/0!	#DIV/0!	#DIV/0!	Core

## Sheet: S7. U-Pb Frog1
Sample Name: Frog Mtn Ss		575972	3729303					207/235		206/238		207/206		Best age
Grain #	[U] ppm	U/Th	207/235	2σ error	206/238	2σ error	RHO	Age Ma	2σ error	Age (Ma)	2σ error	Age (Ma)	2σ error	(Ma)	2σ error	% Discordance*	Rim/Core
Frog1.18	1040	2.693	1.887	0.095	0.1497	0.0054	0	1075	35	897	30	1399	87	897	30	16.5581
Frog1.38	717	1.209	1.857	0.084	0.1556	0.0048	0	1053	29	931	27	1297	56	931	27	11.5859
Frog1.85	409	2.98	1.81	0.077	0.1606	0.0063	0	1037	28	957	35	1191	67	957	35	7.71456
Frog1.120	410	0.819	2.18	0.11	0.1671	0.0079	0	1151	37	991	44	1478	60	991	44	13.901
Frog1.73	542	5.9	1.938	0.056	0.1754	0.005	0	1088	19	1040	27	1173	56	1040	27	4.41176
Frog1.96	579	1.232	2.6	0.1	0.1772	0.0063	0	1289	29	1048	35	1713	58	1048	35	18.6967
Frog1.115	156.6	1.402	2.17	0.15	0.183	0.013	0	1136	48	1069	72	1290	100	1069	72	5.89789
Frog1.19	213	1.411	2.22	0.094	0.1816	0.0065	0	1179	30	1073	35	1338	61	1073	35	8.99067
Frog1.43	166	1.3	2.034	0.083	0.1835	0.0057	0	1118	28	1083	31	1191	77	1083	31	3.13059
Frog1.118	176.9	1.375	2.15	0.13	0.196	0.012	0	1143	41	1147	61	1138	96	1147	61	0.349956
Frog1.99	270.5	0.663	2.69	0.18	0.1967	0.0095	0	1284	39	1151	50	1480	65	1151	50	10.3583
Frog1.63	462	2.24	2.657	0.098	0.2008	0.006	0	1309	27	1181	33	1510	69	1181	33	9.77846
Frog1.25	396	1.205	2.52	0.12	0.2031	0.0087	0	1268	34	1187	46	1439	55	1187	46	6.38801
Frog1.42	236.8	1.956	2.352	0.087	0.2039	0.0064	0	1216	27	1193	34	1257	65	1193	34	1.89145
Frog1.111	144.1	1.318	3.02	0.18	0.205	0.0095	0	1386	46	1196	51	1674	93	1196	51	13.7085
Frog1.119	124	1.23	2.92	0.16	0.247	0.011	0	1372	41	1414	55	1298	87	1298	87	8.93683
Frog1.33	100.1	0.639	2.65	0.12	0.2221	0.009	0	1298	33	1287	47	1321	81	1321	81	2.57381
Frog1.36	463	1.517	2.703	0.091	0.2272	0.0076	0	1322	25	1315	40	1335	55	1335	55	1.49813
Frog1.24	251	2.03	2.75	0.1	0.2304	0.0079	0	1330	27	1333	41	1342	53	1342	53	0.670641
Frog1.14	153	1.86	2.78	0.11	0.2276	0.0091	0	1342	32	1317	47	1375	68	1375	68	4.21818
Frog1.124	474	1.569	2.75	0.14	0.218	0.012	0	1317	39	1264	60	1419	66	1419	66	10.9232
Frog1.13	100.9	1.99	3.28	0.15	0.2519	0.0078	0	1471	34	1445	40	1443	71	1443	71	0.1386
Frog1.59	276	1.484	3.09	0.1	0.2417	0.0063	0	1423	26	1393	33	1453	54	1453	54	4.12939
Frog1.35	201	0.961	3.11	0.12	0.2454	0.0092	0	1423	31	1409	48	1460	55	1460	55	3.49315
Frog1.58	150.1	2.08	2.87	0.15	0.229	0.01	0	1355	39	1323	53	1463	81	1463	81	9.56938
Frog1.86	309	1.285	3.024	0.094	0.2299	0.0064	0	1404	24	1331	34	1487	55	1487	55	10.4909
Frog1.112	319	11.1	3.35	0.18	0.254	0.014	0	1467	44	1448	70	1504	71	1504	71	3.7234
Frog1.92	142	0.884	3.16	0.13	0.2318	0.0066	0	1445	31	1346	36	1562	70	1562	70	13.8284
Frog1.30	184	0.729	3.21	0.16	0.235	0.011	0	1440	38	1354	55	1564	80	1564	80	13.4271
Frog1.40	245	0.917	3.51	0.12	0.2535	0.0087	0	1519	29	1451	45	1625	48	1625	48	10.7077
Frog1.106	128	2.12	3.75	0.18	0.263	0.011	0	1562	39	1494	58	1670	87	1670	87	10.5389
Frog1.79	208	3.003	4.62	0.16	0.316	0.011	0	1743	29	1761	52	1712	54	1712	54	2.86215
Frog1.41	58.4	1.182	4.09	0.23	0.259	0.012	0	1615	48	1486	64	1768	99	1768	99	15.9502
Frog1.34	514	2.24	4.47	0.14	0.2936	0.0094	0	1714	27	1654	47	1775	43	1775	43	6.8169
Frog1.51	427	3.32	4.48	0.14	0.2957	0.0087	0	1720	26	1671	44	1780	43	1780	43	6.1236
Frog1.08	584	0.902	9.92	0.56	0.405	0.024	0	2413	53	2170	100	2647	37	2647	37	18.0204
Frog1.67	144.4	1.265	10.56	0.33	0.412	0.012	0	2479	28	2218	55	2662	41	2662	41	16.6792
Frog1.10	191.9	4.72	12.85	0.42	0.503	0.016	0	2656	32	2626	72	2663	37	2663	37	1.38941
Frog1.20	251	1.44	10.36	0.56	0.416	0.026	0	2444	51	2220	110	2687	62	2687	62	17.38
Frog1.37	197	3.18	11.87	0.41	0.46	0.016	0	2579	33	2427	70	2695	41	2695	41	9.94434
Frog1.102	274	1.313	10.8	0.54	0.422	0.019	0	2478	49	2246	89	2699	39	2699	39	16.784
Frog1.06	266	0.864	11.66	0.58	0.444	0.023	0	2548	46	2360	100	2701	51	2701	51	12.625
Frog1.97	117.3	0.708	11.03	0.51	0.412	0.019	0	2510	42	2212	87	2726	57	2726	57	18.8555	Core
Frog1.110	121.5	2.018	15.35	0.82	0.533	0.029	0	2799	51	2720	120	2863	51	2863	51	4.99476
Frog1.81	3.88	1.87	109.7	8.7	1.11	0.12	0	4759	90	4690	360	5040	150	5040	150	6.94444
Frog1.16	1.58	0.381	167	56	1.24	0.39	0	5010	360	4900	1000	5600	500	5600	500	12.5
Frog1.04	703	0.755	5.8	0.26	0.228	0.011	0	1937	39	1330	58	2660	43	DISC	DISC	50
Frog1.126	1.18	0.98	168	23	1.95	0.31	0	5190	150	6900	740	4750	210	DISC	DISC	45.2632
Frog1.128	738	4.16	2.33	0.13	0.1258	0.0063	0	1198	42	761	36	2070	130	DISC	DISC	36.4775
Frog1.129	7.74	2.43	7.29	0.9	0.225	0.021	0	2070	110	1290	110	2990	230	DISC	DISC	56.8562
Frog1.21	836	2.618	5.19	0.18	0.2503	0.0097	0	1840	30	1435	49	2315	43	DISC	DISC	38.013
Frog1.23	470	0.917	9.41	0.31	0.376	0.013	0	2364	30	2048	58	2656	32	DISC	DISC	22.8916
Frog1.26	68.4	0.0862	185.5	5.4	1.762	0.054	0	5303	29	6530	130	4878	27	DISC	DISC	33.8663
Frog1.39	580	0.884	7.58	0.38	0.304	0.017	0	2158	49	1699	82	2640	45	DISC	DISC	35.6439
Frog1.44	446	1.284	8.81	0.6	0.318	0.02	0	2269	60	1761	95	2770	46	DISC	DISC	36.426
Frog1.46	470	0.747	7.25	0.32	0.274	0.013	0	2124	40	1555	64	2711	46	DISC	DISC	42.6411
Frog1.47	870	1.476	2.43	0.15	0.1003	0.0061	0	1227	44	614	36	2580	61	DISC	DISC	49.9593
Frog1.48	1026	0.678	3.281	0.075	0.1216	0.003	0	1473	18	739	17	2747	41	DISC	DISC	49.8303
Frog1.49	197	1.95	3.1	0.15	0.2138	0.0083	0	1415	36	1244	44	1646	98	DISC	DISC	24.4228
Frog1.69	759	2.19	3.53	0.12	0.233	0.008	0	1526	25	1346	41	1765	55	DISC	DISC	23.7394
Frog1.72	197	0.975	4.61	0.34	0.2049	0.0086	0	1687	62	1196	45	2320	120	DISC	DISC	29.1049
Frog1.74	1035	0.767	1.78	0.11	0.0993	0.0075	0	1023	39	607	44	2056	84	DISC	DISC	40.6647
Frog1.75	12.22	0.885	3770	570	30.1	4.5	0	7750	250	19000	1300	5195	66	DISC	DISC	265.736
Frog1.77	103.9	1.242	3.56	0.2	0.2219	0.0088	0	1516	45	1286	46	1832	97	DISC	DISC	29.8035
Frog1.78	1610	1.198	2.04	0.12	0.1303	0.0097	0	1102	41	782	55	1890	68	DISC	DISC	29.0381
Frog1.93	1324	0.443	1.065	0.028	0.0359	0.0017	0	733	14	227	11	2937	69	DISC	DISC	69.0314
Frog1.95	6.28	0.761	199	21	1.8	0.18	0	5270	110	6320	370	4989	65	DISC	DISC	26.6787
Frog1.97	1657	0.2731	1.52	0.095	0.0422	0.0027	0	931	38	266	17	3327	61	DISC	DISC	71.4286	Rim
0	0	0	0	0	0	0	0	0	0	0	0	0	0	#DIV/0!	#DIV/0!	#DIV/0!	Core
0	0	0	0	0	0	0	0	0	0	0	0	0	0	#DIV/0!	#DIV/0!	#DIV/0!	Core
0	0	0	0	0	0	0	0	0	0	0	0	0	0	#DIV/0!	#DIV/0!	#DIV/0!	Core
0	0	0	0	0	0	0	0	0	0	0	0	0	0	#DIV/0!	#DIV/0!	#DIV/0!	Core
0	0	0	0	0	0	0	0	0	0	0	0	0	0	#DIV/0!	#DIV/0!	#DIV/0!	Core
0	0	0	0	0	0	0	0	0	0	0	0	0	0	#DIV/0!	#DIV/0!	#DIV/0!	Core
0	0	0	0	0	0	0	0	0	0	0	0	0	0	#DIV/0!	#DIV/0!	#DIV/0!	Core
0	0	0	0	0	0	0	0	0	0	0	0	0	0	#DIV/0!	#DIV/0!	#DIV/0!	Core
0	0	0	0	0	0	0	0	0	0	0	0	0	0	#DIV/0!	#DIV/0!	#DIV/0!	Core
0	0	0	0	0	0	0	0	0	0	0	0	0	0	#DIV/0!	#DIV/0!	#DIV/0!	Core
0	0	0	0	0	0	0	0	0	0	0	0	0	0	#DIV/0!	#DIV/0!	#DIV/0!	Core
0	0	0	0	0	0	0	0	0	0	0	0	0	0	#DIV/0!	#DIV/0!	#DIV/0!	Core
0	0	0	0	0	0	0	0	0	0	0	0	0	0	#DIV/0!	#DIV/0!	#DIV/0!	Core
0	0	0	0	0	0	0	0	0	0	0	0	0	0	#DIV/0!	#DIV/0!	#DIV/0!	Core
0	0	0	0	0	0	0	0	0	0	0	0	0	0	#DIV/0!	#DIV/0!	#DIV/0!	Core
0	0	0	0	0	0	0	0	0	0	0	0	0	0	#DIV/0!	#DIV/0!	#DIV/0!	Core
0	0	0	0	0	0	0	0	0	0	0	0	0	0	#DIV/0!	#DIV/0!	#DIV/0!	Core
0	0	0	0	0	0	0	0	0	0	0	0	0	0	#DIV/0!	#DIV/0!	#DIV/0!	Core
0	0	0	0	0	0	0	0	0	0	0	0	0	0	#DIV/0!	#DIV/0!	#DIV/0!	Core
0	0	0	0	0	0	0	0	0	0	0	0	0	0	#DIV/0!	#DIV/0!	#DIV/0!	Core
0	0	0	0	0	0	0	0	0	0	0	0	0	0	#DIV/0!	#DIV/0!	#DIV/0!	Core
0	0	0	0	0	0	0	0	0	0	0	0	0	0	#DIV/0!	#DIV/0!	#DIV/0!	Core
0	0	0	0	0	0	0	0	0	0	0	0	0	0	#DIV/0!	#DIV/0!	#DIV/0!	Core
0	0	0	0	0	0	0	0	0	0	0	0	0	0	#DIV/0!	#DIV/0!	#DIV/0!	Core
0	0	0	0	0	0	0	0	0	0	0	0	0	0	#DIV/0!	#DIV/0!	#DIV/0!	Core
0	0	0	0	0	0	0	0	0	0	0	0	0	0	#DIV/0!	#DIV/0!	#DIV/0!	Core
0	0	0	0	0	0	0	0	0	0	0	0	0	0	#DIV/0!	#DIV/0!	#DIV/0!	Core
0	0	0	0	0	0	0	0	0	0	0	0	0	0	#DIV/0!	#DIV/0!	#DIV/0!	Core
0	0	0	0	0	0	0	0	0	0	0	0	0	0	#DIV/0!	#DIV/0!	#DIV/0!	Core
0	0	0	0	0	0	0	0	0	0	0	0	0	0	#DIV/0!	#DIV/0!	#DIV/0!	Core
0	0	0	0	0	0	0	0	0	0	0	0	0	0	#DIV/0!	#DIV/0!	#DIV/0!	Core
0	0	0	0	0	0	0	0	0	0	0	0	0	0	#DIV/0!	#DIV/0!	#DIV/0!	Core
0	0	0	0	0	0	0	0	0	0	0	0	0	0	#DIV/0!	#DIV/0!	#DIV/0!	Core
0	0	0	0	0	0	0	0	0	0	0	0	0	0	#DIV/0!	#DIV/0!	#DIV/0!	Core
0	0	0	0	0	0	0	0	0	0	0	0	0	0	#DIV/0!	#DIV/0!	#DIV/0!	Core
0	0	0	0	0	0	0	0	0	0	0	0	0	0	#DIV/0!	#DIV/0!	#DIV/0!	Core
0	0	0	0	0	0	0	0	0	0	0	0	0	0	#DIV/0!	#DIV/0!	#DIV/0!	Core
0	0	0	0	0	0	0	0	0	0	0	0	0	0	#DIV/0!	#DIV/0!	#DIV/0!	Core
0	0	0	0	0	0	0	0	0	0	0	0	0	0	#DIV/0!	#DIV/0!	#DIV/0!	Core
0	0	0	0	0	0	0	0	0	0	0	0	0	0	#DIV/0!	#DIV/0!	#DIV/0!	Core
0	0	0	0	0	0	0	0	0	0	0	0	0	0	#DIV/0!	#DIV/0!	#DIV/0!	Core
0	0	0	0	0	0	0	0	0	0	0	0	0	0	#DIV/0!	#DIV/0!	#DIV/0!	Core
0	0	0	0	0	0	0	0	0	0	0	0	0	0	#DIV/0!	#DIV/0!	#DIV/0!	Core
0	0	0	0	0	0	0	0	0	0	0	0	0	0	#DIV/0!	#DIV/0!	#DIV/0!	Core
0	0	0	0	0	0	0	0	0	0	0	0	0	0	#DIV/0!	#DIV/0!	#DIV/0!	Core
0	0	0	0	0	0	0	0	0	0	0	0	0	0	#DIV/0!	#DIV/0!	#DIV/0!	Core
0	0	0	0	0	0	0	0	0	0	0	0	0	0	#DIV/0!	#DIV/0!	#DIV/0!	Core
0	0	0	0	0	0	0	0	0	0	0	0	0	0	#DIV/0!	#DIV/0!	#DIV/0!	Core
0	0	0	0	0	0	0	0	0	0	0	0	0	0	#DIV/0!	#DIV/0!	#DIV/0!	Core
0	0	0	0	0	0	0	0	0	0	0	0	0	0	#DIV/0!	#DIV/0!	#DIV/0!	Core
0	0	0	0	0	0	0	0	0	0	0	0	0	0	#DIV/0!	#DIV/0!	#DIV/0!	Core
0	0	0	0	0	0	0	0	0	0	0	0	0	0	#DIV/0!	#DIV/0!	#DIV/0!	Core
0	0	0	0	0	0	0	0	0	0	0	0	0	0	#DIV/0!	#DIV/0!	#DIV/0!	Core
0	0	0	0	0	0	0	0	0	0	0	0	0	0	#DIV/0!	#DIV/0!	#DIV/0!	Core
0	0	0	0	0	0	0	0	0	0	0	0	0	0	#DIV/0!	#DIV/0!	#DIV/0!	Core
0	0	0	0	0	0	0	0	0	0	0	0	0	0	#DIV/0!	#DIV/0!	#DIV/0!	Core
0	0	0	0	0	0	0	0	0	0	0	0	0	0	#DIV/0!	#DIV/0!	#DIV/0!	Core
0	0	0	0	0	0	0	0	0	0	0	0	0	0	#DIV/0!	#DIV/0!	#DIV/0!	Core
0	0	0	0	0	0	0	0	0	0	0	0	0	0	#DIV/0!	#DIV/0!	#DIV/0!	Core
0	0	0	0	0	0	0	0	0	0	0	0	0	0	#DIV/0!	#DIV/0!	#DIV/0!	Core
0	0	0	0	0	0	0	0	0	0	0	0	0	0	#DIV/0!	#DIV/0!	#DIV/0!	Core
0	0	0	0	0	0	0	0	0	0	0	0	0	0	#DIV/0!	#DIV/0!	#DIV/0!	Core
0	0	0	0	0	0	0	0	0	0	0	0	0	0	#DIV/0!	#DIV/0!	#DIV/0!	Core
0	0	0	0	0	0	0	0	0	0	0	0	0	0	#DIV/0!	#DIV/0!	#DIV/0!	Core
0	0	0	0	0	0	0	0	0	0	0	0	0	0	#DIV/0!	#DIV/0!	#DIV/0!	Core
0	0	0	0	0	0	0	0	0	0	0	0	0	0	#DIV/0!	#DIV/0!	#DIV/0!	Core
0	0	0	0	0	0	0	0	0	0	0	0	0	0	#DIV/0!	#DIV/0!	#DIV/0!	Core
0	0	0	0	0	0	0	0	0	0	0	0	0	0	#DIV/0!	#DIV/0!	#DIV/0!	Core
0	0	0	0	0	0	0	0	0	0	0	0	0	0	#DIV/0!	#DIV/0!	#DIV/0!	Core
0	0	0	0	0	0	0	0	0	0	0	0	0	0	#DIV/0!	#DIV/0!	#DIV/0!	Core
0	0	0	0	0	0	0	0	0	0	0	0	0	0	#DIV/0!	#DIV/0!	#DIV/0!	Core
0	0	0	0	0	0	0	0	0	0	0	0	0	0	#DIV/0!	#DIV/0!	#DIV/0!	Core
0	0	0	0	0	0	0	0	0	0	0	0	0	0	#DIV/0!	#DIV/0!	#DIV/0!	Core
0	0	0	0	0	0	0	0	0	0	0	0	0	0	#DIV/0!	#DIV/0!	#DIV/0!	Core
0	0	0	0	0	0	0	0	0	0	0	0	0	0	#DIV/0!	#DIV/0!	#DIV/0!	Core
0	0	0	0	0	0	0	0	0	0	0	0	0	0	#DIV/0!	#DIV/0!	#DIV/0!	Core
0	0	0	0	0	0	0	0	0	0	0	0	0	0	#DIV/0!	#DIV/0!	#DIV/0!	Core
0	0	0	0	0	0	0	0	0	0	0	0	0	0	#DIV/0!	#DIV/0!	#DIV/0!	Core
0	0	0	0	0	0	0	0	0	0	0	0	0	0	#DIV/0!	#DIV/0!	#DIV/0!	Core
0	0	0	0	0	0	0	0	0	0	0	0	0	0	#DIV/0!	#DIV/0!	#DIV/0!	Core
0	0	0	0	0	0	0	0	0	0	0	0	0	0	#DIV/0!	#DIV/0!	#DIV/0!	Core
0	0	0	0	0	0	0	0	0	0	0	0	0	0	#DIV/0!	#DIV/0!	#DIV/0!	Core
0	0	0	0	0	0	0	0	0	0	0	0	0	0	#DIV/0!	#DIV/0!	#DIV/0!	Core
0	0	0	0	0	0	0	0	0	0	0	0	0	0	#DIV/0!	#DIV/0!	#DIV/0!	Core
0	0	0	0	0	0	0	0	0	0	0	0	0	0	#DIV/0!	#DIV/0!	#DIV/0!	Core
0	0	0	0	0	0	0	0	0	0	0	0	0	0	#DIV/0!	#DIV/0!	#DIV/0!	Core
0	0	0	0	0	0	0	0	0	0	0	0	0	0	#DIV/0!	#DIV/0!	#DIV/0!	Core
0	0	0	0	0	0	0	0	0	0	0	0	0	0	#DIV/0!	#DIV/0!	#DIV/0!	Core
0	0	0	0	0	0	0	0	0	0	0	0	0	0	#DIV/0!	#DIV/0!	#DIV/0!	Core
0	0	0	0	0	0	0	0	0	0	0	0	0	0	#DIV/0!	#DIV/0!	#DIV/0!	Core
0	0	0	0	0	0	0	0	0	0	0	0	0	0	#DIV/0!	#DIV/0!	#DIV/0!	Core
0	0	0	0	0	0	0	0	0	0	0	0	0	0	#DIV/0!	#DIV/0!	#DIV/0!	Core
0	0	0	0	0	0	0	0	0	0	0	0	0	0	#DIV/0!	#DIV/0!	#DIV/0!	Core
0	0	0	0	0	0	0	0	0	0	0	0	0	0	#DIV/0!	#DIV/0!	#DIV/0!	Core
0	0	0	0	0	0	0	0	0	0	0	0	0	0	#DIV/0!	#DIV/0!	#DIV/0!	Core
0	0	0	0	0	0	0	0	0	0	0	0	0	0	#DIV/0!	#DIV/0!	#DIV/0!	Core
0	0	0	0	0	0	0	0	0	0	0	0	0	0	#DIV/0!	#DIV/0!	#DIV/0!	Core
0	0	0	0	0	0	0	0	0	0	0	0	0	0	#DIV/0!	#DIV/0!	#DIV/0!	Core
0	0	0	0	0	0	0	0	0	0	0	0	0	0	#DIV/0!	#DIV/0!	#DIV/0!	Core
0	0	0	0	0	0	0	0	0	0	0	0	0	0	#DIV/0!	#DIV/0!	#DIV/0!	Core
0	0	0	0	0	0	0	0	0	0	0	0	0	0	#DIV/0!	#DIV/0!	#DIV/0!	Core
0	0	0	0	0	0	0	0	0	0	0	0	0	0	#DIV/0!	#DIV/0!	#DIV/0!	Core
0	0	0	0	0	0	0	0	0	0	0	0	0	0	#DIV/0!	#DIV/0!	#DIV/0!	Core
0	0	0	0	0	0	0	0	0	0	0	0	0	0	#DIV/0!	#DIV/0!	#DIV/0!	Core
0	0	0	0	0	0	0	0	0	0	0	0	0	0	#DIV/0!	#DIV/0!	#DIV/0!	Core
0	0	0	0	0	0	0	0	0	0	0	0	0	0	#DIV/0!	#DIV/0!	#DIV/0!	Core
0	0	0	0	0	0	0	0	0	0	0	0	0	0	#DIV/0!	#DIV/0!	#DIV/0!	Core
0	0	0	0	0	0	0	0	0	0	0	0	0	0	#DIV/0!	#DIV/0!	#DIV/0!	Core
0	0	0	0	0	0	0	0	0	0	0	0	0	0	#DIV/0!	#DIV/0!	#DIV/0!	Core
0	0	0	0	0	0	0	0	0	0	0	0	0	0	#DIV/0!	#DIV/0!	#DIV/0!	Core
0	0	0	0	0	0	0	0	0	0	0	0	0	0	#DIV/0!	#DIV/0!	#DIV/0!	Core
0	0	0	0	0	0	0	0	0	0	0	0	0	0	#DIV/0!	#DIV/0!	#DIV/0!	Core
0	0	0	0	0	0	0	0	0	0	0	0	0	0	#DIV/0!	#DIV/0!	#DIV/0!	Core
0	0	0	0	0	0	0	0	0	0	0	0	0	0	#DIV/0!	#DIV/0!	#DIV/0!	Core
0	0	0	0	0	0	0	0	0	0	0	0	0	0	#DIV/0!	#DIV/0!	#DIV/0!	Core
0	0	0	0	0	0	0	0	0	0	0	0	0	0	#DIV/0!	#DIV/0!	#DIV/0!	Core
0	0	0	0	0	0	0	0	0	0	0	0	0	0	#DIV/0!	#DIV/0!	#DIV/0!	Core
0	0	0	0	0	0	0	0	0	0	0	0	0	0	#DIV/0!	#DIV/0!	#DIV/0!	Core
0	0	0	0	0	0	0	0	0	0	0	0	0	0	#DIV/0!	#DIV/0!	#DIV/0!	Core
0	0	0	0	0	0	0	0	0	0	0	0	0	0	#DIV/0!	#DIV/0!	#DIV/0!	Core
0	0	0	0	0	0	0	0	0	0	0	0	0	0	#DIV/0!	#DIV/0!	#DIV/0!	Core
0	0	0	0	0	0	0	0	0	0	0	0	0	0	#DIV/0!	#DIV/0!	#DIV/0!	Core
0	0	0	0	0	0	0	0	0	0	0	0	0	0	#DIV/0!	#DIV/0!	#DIV/0!	Core
0	0	0	0	0	0	0	0	0	0	0	0	0	0	#DIV/0!	#DIV/0!	#DIV/0!	Core
0	0	0	0	0	0	0	0	0	0	0	0	0	0	#DIV/0!	#DIV/0!	#DIV/0!	Core
0	0	0	0	0	0	0	0	0	0	0	0	0	0	#DIV/0!	#DIV/0!	#DIV/0!	Core
0	0	0	0	0	0	0	0	0	0	0	0	0	0	#DIV/0!	#DIV/0!	#DIV/0!	Core
0	0	0	0	0	0	0	0	0	0	0	0	0	0	#DIV/0!	#DIV/0!	#DIV/0!	Core
0	0	0	0	0	0	0	0	0	0	0	0	0	0	#DIV/0!	#DIV/0!	#DIV/0!	Core
0	0	0	0	0	0	0	0	0	0	0	0	0	0	#DIV/0!	#DIV/0!	#DIV/0!	Core
0	0	0	0	0	0	0	0	0	0	0	0	0	0	#DIV/0!	#DIV/0!	#DIV/0!	Core
0	0	0	0	0	0	0	0	0	0	0	0	0	0	#DIV/0!	#DIV/0!	#DIV/0!	Core
0	0	0	0	0	0	0	0	0	0	0	0	0	0	#DIV/0!	#DIV/0!	#DIV/0!	Core
0	0	0	0	0	0	0	0	0	0	0	0	0	0	#DIV/0!	#DIV/0!	#DIV/0!	Core
0	0	0	0	0	0	0	0	0	0	0	0	0	0	#DIV/0!	#DIV/0!	#DIV/0!	Core
0	0	0	0	0	0	0	0	0	0	0	0	0	0	#DIV/0!	#DIV/0!	#DIV/0!	Core
0	0	0	0	0	0	0	0	0	0	0	0	0	0	#DIV/0!	#DIV/0!	#DIV/0!	Core
0	0	0	0	0	0	0	0	0	0	0	0	0	0	#DIV/0!	#DIV/0!	#DIV/0!	Core
0	0	0	0	0	0	0	0	0	0	0	0	0	0	#DIV/0!	#DIV/0!	#DIV/0!	Core
0	0	0	0	0	0	0	0	0	0	0	0	0	0	#DIV/0!	#DIV/0!	#DIV/0!	Core
0	0	0	0	0	0	0	0	0	0	0	0	0	0	#DIV/0!	#DIV/0!	#DIV/0!	Core
0	0	0	0	0	0	0	0	0	0	0	0	0	0	#DIV/0!	#DIV/0!	#DIV/0!	Core
0	0	0	0	0	0	0	0	0	0	0	0	0	0	#DIV/0!	#DIV/0!	#DIV/0!	Core
0	0	0	0	0	0	0	0	0	0	0	0	0	0	#DIV/0!	#DIV/0!	#DIV/0!	Core
0	0	0	0	0	0	0	0	0	0	0	0	0	0	#DIV/0!	#DIV/0!	#DIV/0!	Core
0	0	0	0	0	0	0	0	0	0	0	0	0	0	#DIV/0!	#DIV/0!	#DIV/0!	Core
0	0	0	0	0	0	0	0	0	0	0	0	0	0	#DIV/0!	#DIV/0!	#DIV/0!	Core
0	0	0	0	0	0	0	0	0	0	0	0	0	0	#DIV/0!	#DIV/0!	#DIV/0!	Core
0	0	0	0	0	0	0	0	0	0	0	0	0	0	#DIV/0!	#DIV/0!	#DIV/0!	Core
0	0	0	0	0	0	0	0	0	0	0	0	0	0	#DIV/0!	#DIV/0!	#DIV/0!	Core
0	0	0	0	0	0	0	0	0	0	0	0	0	0	#DIV/0!	#DIV/0!	#DIV/0!	Core
0	0	0	0	0	0	0	0	0	0	0	0	0	0	#DIV/0!	#DIV/0!	#DIV/0!	Core
0	0	0	0	0	0	0	0	0	0	0	0	0	0	#DIV/0!	#DIV/0!	#DIV/0!	Core
0	0	0	0	0	0	0	0	0	0	0	0	0	0	#DIV/0!	#DIV/0!	#DIV/0!	Core
0	0	0	0	0	0	0	0	0	0	0	0	0	0	#DIV/0!	#DIV/0!	#DIV/0!	Core
0	0	0	0	0	0	0	0	0	0	0	0	0	0	#DIV/0!	#DIV/0!	#DIV/0!	Core
0	0	0	0	0	0	0	0	0	0	0	0	0	0	#DIV/0!	#DIV/0!	#DIV/0!	Core
0	0	0	0	0	0	0	0	0	0	0	0	0	0	#DIV/0!	#DIV/0!	#DIV/0!	Core
0	0	0	0	0	0	0	0	0	0	0	0	0	0	#DIV/0!	#DIV/0!	#DIV/0!	Core
0	0	0	0	0	0	0	0	0	0	0	0	0	0	#DIV/0!	#DIV/0!	#DIV/0!	Core
0	0	0	0	0	0	0	0	0	0	0	0	0	0	#DIV/0!	#DIV/0!	#DIV/0!	Core
0	0	0	0	0	0	0	0	0	0	0	0	0	0	#DIV/0!	#DIV/0!	#DIV/0!	Core
0	0	0	0	0	0	0	0	0	0	0	0	0	0	#DIV/0!	#DIV/0!	#DIV/0!	Core
0	0	0	0	0	0	0	0	0	0	0	0	0	0	#DIV/0!	#DIV/0!	#DIV/0!	Core
0	0	0	0	0	0	0	0	0	0	0	0	0	0	#DIV/0!	#DIV/0!	#DIV/0!	Core
0	0	0	0	0	0	0	0	0	0	0	0	0	0	#DIV/0!	#DIV/0!	#DIV/0!	Core
0	0	0	0	0	0	0	0	0	0	0	0	0	0	#DIV/0!	#DIV/0!	#DIV/0!	Core
0	0	0	0	0	0	0	0	0	0	0	0	0	0	#DIV/0!	#DIV/0!	#DIV/0!	Core
0	0	0	0	0	0	0	0	0	0	0	0	0	0	#DIV/0!	#DIV/0!	#DIV/0!	Core
0	0	0	0	0	0	0	0	0	0	0	0	0	0	#DIV/0!	#DIV/0!	#DIV/0!	Core
0	0	0	0	0	0	0	0	0	0	0	0	0	0	#DIV/0!	#DIV/0!	#DIV/0!	Core
0	0	0	0	0	0	0	0	0	0	0	0	0	0	#DIV/0!	#DIV/0!	#DIV/0!	Core
0	0	0	0	0	0	0	0	0	0	0	0	0	0	#DIV/0!	#DIV/0!	#DIV/0!	Core
0	0	0	0	0	0	0	0	0	0	0	0	0	0	#DIV/0!	#DIV/0!	#DIV/0!	Core
0	0	0	0	0	0	0	0	0	0	0	0	0	0	#DIV/0!	#DIV/0!	#DIV/0!	Core
0	0	0	0	0	0	0	0	0	0	0	0	0	0	#DIV/0!	#DIV/0!	#DIV/0!	Core
0	0	0	0	0	0	0	0	0	0	0	0	0	0	#DIV/0!	#DIV/0!	#DIV/0!	Core
0	0	0	0	0	0	0	0	0	0	0	0	0	0	#DIV/0!	#DIV/0!	#DIV/0!	Core
0	0	0	0	0	0	0	0	0	0	0	0	0	0	#DIV/0!	#DIV/0!	#DIV/0!	Core
0	0	0	0	0	0	0	0	0	0	0	0	0	0	#DIV/0!	#DIV/0!	#DIV/0!	Core
0	0	0	0	0	0	0	0	0	0	0	0	0	0	#DIV/0!	#DIV/0!	#DIV/0!	Core
0	0	0	0	0	0	0	0	0	0	0	0	0	0	#DIV/0!	#DIV/0!	#DIV/0!	Core
0	0	0	0	0	0	0	0	0	0	0	0	0	0	#DIV/0!	#DIV/0!	#DIV/0!	Core
0	0	0	0	0	0	0	0	0	0	0	0	0	0	#DIV/0!	#DIV/0!	#DIV/0!	Core
0	0	0	0	0	0	0	0	0	0	0	0	0	0	#DIV/0!	#DIV/0!	#DIV/0!	Core
0	0	0	0	0	0	0	0	0	0	0	0	0	0	#DIV/0!	#DIV/0!	#DIV/0!	Core
0	0	0	0	0	0	0	0	0	0	0	0	0	0	#DIV/0!	#DIV/0!	#DIV/0!	Core
0	0	0	0	0	0	0	0	0	0	0	0	0	0	#DIV/0!	#DIV/0!	#DIV/0!	Core
0	0	0	0	0	0	0	0	0	0	0	0	0	0	#DIV/0!	#DIV/0!	#DIV/0!	Core
0	0	0	0	0	0	0	0	0	0	0	0	0	0	#DIV/0!	#DIV/0!	#DIV/0!	Core
0	0	0	0	0	0	0	0	0	0	0	0	0	0	#DIV/0!	#DIV/0!	#DIV/0!	Core
0	0	0	0	0	0	0	0	0	0	0	0	0	0	#DIV/0!	#DIV/0!	#DIV/0!	Core
0	0	0	0	0	0	0	0	0	0	0	0	0	0	#DIV/0!	#DIV/0!	#DIV/0!	Core
0	0	0	0	0	0	0	0	0	0	0	0	0	0	#DIV/0!	#DIV/0!	#DIV/0!	Core
0	0	0	0	0	0	0	0	0	0	0	0	0	0	#DIV/0!	#DIV/0!	#DIV/0!	Core
0	0	0	0	0	0	0	0	0	0	0	0	0	0	#DIV/0!	#DIV/0!	#DIV/0!	Core
0	0	0	0	0	0	0	0	0	0	0	0	0	0	#DIV/0!	#DIV/0!	#DIV/0!	Core
0	0	0	0	0	0	0	0	0	0	0	0	0	0	#DIV/0!	#DIV/0!	#DIV/0!	Core
0	0	0	0	0	0	0	0	0	0	0	0	0	0	#DIV/0!	#DIV/0!	#DIV/0!	Core
0	0	0	0	0	0	0	0	0	0	0	0	0	0	#DIV/0!	#DIV/0!	#DIV/0!	Core
0	0	0	0	0	0	0	0	0	0	0	0	0	0	#DIV/0!	#DIV/0!	#DIV/0!	Core
0	0	0	0	0	0	0	0	0	0	0	0	0	0	#DIV/0!	#DIV/0!	#DIV/0!	Core
0	0	0	0	0	0	0	0	0	0	0	0	0	0	#DIV/0!	#DIV/0!	#DIV/0!	Core
0	0	0	0	0	0	0	0	0	0	0	0	0	0	#DIV/0!	#DIV/0!	#DIV/0!	Core
0	0	0	0	0	0	0	0	0	0	0	0	0	0	#DIV/0!	#DIV/0!	#DIV/0!	Core
0	0	0	0	0	0	0	0	0	0	0	0	0	0	#DIV/0!	#DIV/0!	#DIV/0!	Core
0	0	0	0	0	0	0	0	0	0	0	0	0	0	#DIV/0!	#DIV/0!	#DIV/0!	Core
0	0	0	0	0	0	0	0	0	0	0	0	0	0	#DIV/0!	#DIV/0!	#DIV/0!	Core
0	0	0	0	0	0	0	0	0	0	0	0	0	0	#DIV/0!	#DIV/0!	#DIV/0!	Core
0	0	0	0	0	0	0	0	0	0	0	0	0	0	#DIV/0!	#DIV/0!	#DIV/0!	Core
0	0	0	0	0	0	0	0	0	0	0	0	0	0	#DIV/0!	#DIV/0!	#DIV/0!	Core
0	0	0	0	0	0	0	0	0	0	0	0	0	0	#DIV/0!	#DIV/0!	#DIV/0!	Core
0	0	0	0	0	0	0	0	0	0	0	0	0	0	#DIV/0!	#DIV/0!	#DIV/0!	Core
0	0	0	0	0	0	0	0	0	0	0	0	0	0	#DIV/0!	#DIV/0!	#DIV/0!	Core
0	0	0	0	0	0	0	0	0	0	0	0	0	0	#DIV/0!	#DIV/0!	#DIV/0!	Core
0	0	0	0	0	0	0	0	0	0	0	0	0	0	#DIV/0!	#DIV/0!	#DIV/0!	Core
0	0	0	0	0	0	0	0	0	0	0	0	0	0	#DIV/0!	#DIV/0!	#DIV/0!	Core
0	0	0	0	0	0	0	0	0	0	0	0	0	0	#DIV/0!	#DIV/0!	#DIV/0!	Core
0	0	0	0	0	0	0	0	0	0	0	0	0	0	#DIV/0!	#DIV/0!	#DIV/0!	Core
0	0	0	0	0	0	0	0	0	0	0	0	0	0	#DIV/0!	#DIV/0!	#DIV/0!	Core
0	0	0	0	0	0	0	0	0	0	0	0	0	0	#DIV/0!	#DIV/0!	#DIV/0!	Core
0	0	0	0	0	0	0	0	0	0	0	0	0	0	#DIV/0!	#DIV/0!	#DIV/0!	Core
0	0	0	0	0	0	0	0	0	0	0	0	0	0	#DIV/0!	#DIV/0!	#DIV/0!	Core
0	0	0	0	0	0	0	0	0	0	0	0	0	0	#DIV/0!	#DIV/0!	#DIV/0!	Core
0	0	0	0	0	0	0	0	0	0	0	0	0	0	#DIV/0!	#DIV/0!	#DIV/0!	Core
0	0	0	0	0	0	0	0	0	0	0	0	0	0	#DIV/0!	#DIV/0!	#DIV/0!	Core
0	0	0	0	0	0	0	0	0	0	0	0	0	0	#DIV/0!	#DIV/0!	#DIV/0!	Core
0	0	0	0	0	0	0	0	0	0	0	0	0	0	#DIV/0!	#DIV/0!	#DIV/0!	Core
0	0	0	0	0	0	0	0	0	0	0	0	0	0	#DIV/0!	#DIV/0!	#DIV/0!	Core
0	0	0	0	0	0	0	0	0	0	0	0	0	0	#DIV/0!	#DIV/0!	#DIV/0!	Core
0	0	0	0	0	0	0	0	0	0	0	0	0	0	#DIV/0!	#DIV/0!	#DIV/0!	Core
0	0	0	0	0	0	0	0	0	0	0	0	0	0	#DIV/0!	#DIV/0!	#DIV/0!	Core
0	0	0	0	0	0	0	0	0	0	0	0	0	0	#DIV/0!	#DIV/0!	#DIV/0!	Core
0	0	0	0	0	0	0	0	0	0	0	0	0	0	#DIV/0!	#DIV/0!	#DIV/0!	Core
0	0	0	0	0	0	0	0	0	0	0	0	0	0	#DIV/0!	#DIV/0!	#DIV/0!	Core
0	0	0	0	0	0	0	0	0	0	0	0	0	0	#DIV/0!	#DIV/0!	#DIV/0!	Core
0	0	0	0	0	0	0	0	0	0	0	0	0	0	#DIV/0!	#DIV/0!	#DIV/0!	Core
0	0	0	0	0	0	0	0	0	0	0	0	0	0	#DIV/0!	#DIV/0!	#DIV/0!	Core
0	0	0	0	0	0	0	0	0	0	0	0	0	0	#DIV/0!	#DIV/0!	#DIV/0!	Core
0	0	0	0	0	0	0	0	0	0	0	0	0	0	#DIV/0!	#DIV/0!	#DIV/0!	Core
0	0	0	0	0	0	0	0	0	0	0	0	0	0	#DIV/0!	#DIV/0!	#DIV/0!	Core
0	0	0	0	0	0	0	0	0	0	0	0	0	0	#DIV/0!	#DIV/0!	#DIV/0!	Core
0	0	0	0	0	0	0	0	0	0	0	0	0	0	#DIV/0!	#DIV/0!	#DIV/0!	Core
0	0	0	0	0	0	0	0	0	0	0	0	0	0	#DIV/0!	#DIV/0!	#DIV/0!	Core
0	0	0	0	0	0	0	0	0	0	0	0	0	0	#DIV/0!	#DIV/0!	#DIV/0!	Core
0	0	0	0	0	0	0	0	0	0	0	0	0	0	#DIV/0!	#DIV/0!	#DIV/0!	Core
0	0	0	0	0	0	0	0	0	0	0	0	0	0	#DIV/0!	#DIV/0!	#DIV/0!	Core
0	0	0	0	0	0	0	0	0	0	0	0	0	0	#DIV/0!	#DIV/0!	#DIV/0!	Core
0	0	0	0	0	0	0	0	0	0	0	0	0	0	#DIV/0!	#DIV/0!	#DIV/0!	Core
0	0	0	0	0	0	0	0	0	0	0	0	0	0	#DIV/0!	#DIV/0!	#DIV/0!	Core
0	0	0	0	0	0	0	0	0	0	0	0	0	0	#DIV/0!	#DIV/0!	#DIV/0!	Core
0	0	0	0	0	0	0	0	0	0	0	0	0	0	#DIV/0!	#DIV/0!	#DIV/0!	Core
0	0	0	0	0	0	0	0	0	0	0	0	0	0	#DIV/0!	#DIV/0!	#DIV/0!	Core
0	0	0	0	0	0	0	0	0	0	0	0	0	0	#DIV/0!	#DIV/0!	#DIV/0!	Core
0	0	0	0	0	0	0	0	0	0	0	0	0	0	#DIV/0!	#DIV/0!	#DIV/0!	Core
0	0	0	0	0	0	0	0	0	0	0	0	0	0	#DIV/0!	#DIV/0!	#DIV/0!	Core
0	0	0	0	0	0	0	0	0	0	0	0	0	0	#DIV/0!	#DIV/0!	#DIV/0!	Core
0	0	0	0	0	0	0	0	0	0	0	0	0	0	#DIV/0!	#DIV/0!	#DIV/0!	Core
0	0	0	0	0	0	0	0	0	0	0	0	0	0	#DIV/0!	#DIV/0!	#DIV/0!	Core
0	0	0	0	0	0	0	0	0	0	0	0	0	0	#DIV/0!	#DIV/0!	#DIV/0!	Core
0	0	0	0	0	0	0	0	0	0	0	0	0	0	#DIV/0!	#DIV/0!	#DIV/0!	Core
0	0	0	0	0	0	0	0	0	0	0	0	0	0	#DIV/0!	#DIV/0!	#DIV/0!	Core
0	0	0	0	0	0	0	0	0	0	0	0	0	0	#DIV/0!	#DIV/0!	#DIV/0!	Core
0	0	0	0	0	0	0	0	0	0	0	0	0	0	#DIV/0!	#DIV/0!	#DIV/0!	Core
0	0	0	0	0	0	0	0	0	0	0	0	0	0	#DIV/0!	#DIV/0!	#DIV/0!	Core
0	0	0	0	0	0	0	0	0	0	0	0	0	0	#DIV/0!	#DIV/0!	#DIV/0!	Core
0	0	0	0	0	0	0	0	0	0	0	0	0	0	#DIV/0!	#DIV/0!	#DIV/0!	Core
0	0	0	0	0	0	0	0	0	0	0	0	0	0	#DIV/0!	#DIV/0!	#DIV/0!	Core
0	0	0	0	0	0	0	0	0	0	0	0	0	0	#DIV/0!	#DIV/0!	#DIV/0!	Core
0	0	0	0	0	0	0	0	0	0	0	0	0	0	#DIV/0!	#DIV/0!	#DIV/0!	Core
0	0	0	0	0	0	0	0	0	0	0	0	0	0	#DIV/0!	#DIV/0!	#DIV/0!	Core
0	0	0	0	0	0	0	0	0	0	0	0	0	0	#DIV/0!	#DIV/0!	#DIV/0!	Core
0	0	0	0	0	0	0	0	0	0	0	0	0	0	#DIV/0!	#DIV/0!	#DIV/0!	Core
0	0	0	0	0	0	0	0	0	0	0	0	0	0	#DIV/0!	#DIV/0!	#DIV/0!	Core
0	0	0	0	0	0	0	0	0	0	0	0	0	0	#DIV/0!	#DIV/0!	#DIV/0!	Core
0	0	0	0	0	0	0	0	0	0	0	0	0	0	#DIV/0!	#DIV/0!	#DIV/0!	Core
0	0	0	0	0	0	0	0	0	0	0	0	0	0	#DIV/0!	#DIV/0!	#DIV/0!	Core
0	0	0	0	0	0	0	0	0	0	0	0	0	0	#DIV/0!	#DIV/0!	#DIV/0!	Core
0	0	0	0	0	0	0	0	0	0	0	0	0	0	#DIV/0!	#DIV/0!	#DIV/0!	Core
0	0	0	0	0	0	0	0	0	0	0	0	0	0	#DIV/0!	#DIV/0!	#DIV/0!	Core
0	0	0	0	0	0	0	0	0	0	0	0	0	0	#DIV/0!	#DIV/0!	#DIV/0!	Core
0	0	0	0	0	0	0	0	0	0	0	0	0	0	#DIV/0!	#DIV/0!	#DIV/0!	Core
0	0	0	0	0	0	0	0	0	0	0	0	0	0	#DIV/0!	#DIV/0!	#DIV/0!	Core
0	0	0	0	0	0	0	0	0	0	0	0	0	0	#DIV/0!	#DIV/0!	#DIV/0!	Core
0	0	0	0	0	0	0	0	0	0	0	0	0	0	#DIV/0!	#DIV/0!	#DIV/0!	Core
0	0	0	0	0	0	0	0	0	0	0	0	0	0	#DIV/0!	#DIV/0!	#DIV/0!	Core
0	0	0	0	0	0	0	0	0	0	0	0	0	0	#DIV/0!	#DIV/0!	#DIV/0!	Core
0	0	0	0	0	0	0	0	0	0	0	0	0	0	#DIV/0!	#DIV/0!	#DIV/0!	Core
0	0	0	0	0	0	0	0	0	0	0	0	0	0	#DIV/0!	#DIV/0!	#DIV/0!	Core
0	0	0	0	0	0	0	0	0	0	0	0	0	0	#DIV/0!	#DIV/0!	#DIV/0!	Core
0	0	0	0	0	0	0	0	0	0	0	0	0	0	#DIV/0!	#DIV/0!	#DIV/0!	Core
0	0	0	0	0	0	0	0	0	0	0	0	0	0	#DIV/0!	#DIV/0!	#DIV/0!	Core
0	0	0	0	0	0	0	0	0	0	0	0	0	0	#DIV/0!	#DIV/0!	#DIV/0!	Core
0	0	0	0	0	0	0	0	0	0	0	0	0	0	#DIV/0!	#DIV/0!	#DIV/0!	Core
0	0	0	0	0	0	0	0	0	0	0	0	0	0	#DIV/0!	#DIV/0!	#DIV/0!	Core
0	0	0	0	0	0	0	0	0	0	0	0	0	0	#DIV/0!	#DIV/0!	#DIV/0!	Core
0	0	0	0	0	0	0	0	0	0	0	0	0	0	#DIV/0!	#DIV/0!	#DIV/0!	Core
0	0	0	0	0	0	0	0	0	0	0	0	0	0	#DIV/0!	#DIV/0!	#DIV/0!	Core
0	0	0	0	0	0	0	0	0	0	0	0	0	0	#DIV/0!	#DIV/0!	#DIV/0!	Core
0	0	0	0	0	0	0	0	0	0	0	0	0	0	#DIV/0!	#DIV/0!	#DIV/0!	Core
0	0	0	0	0	0	0	0	0	0	0	0	0	0	#DIV/0!	#DIV/0!	#DIV/0!	Core
0	0	0	0	0	0	0	0	0	0	0	0	0	0	#DIV/0!	#DIV/0!	#DIV/0!	Core
0	0	0	0	0	0	0	0	0	0	0	0	0	0	#DIV/0!	#DIV/0!	#DIV/0!	Core
0	0	0	0	0	0	0	0	0	0	0	0	0	0	#DIV/0!	#DIV/0!	#DIV/0!	Core
0	0	0	0	0	0	0	0	0	0	0	0	0	0	#DIV/0!	#DIV/0!	#DIV/0!	Core
0	0	0	0	0	0	0	0	0	0	0	0	0	0	#DIV/0!	#DIV/0!	#DIV/0!	Core
0	0	0	0	0	0	0	0	0	0	0	0	0	0	#DIV/0!	#DIV/0!	#DIV/0!	Core
0	0	0	0	0	0	0	0	0	0	0	0	0	0	#DIV/0!	#DIV/0!	#DIV/0!	Core
0	0	0	0	0	0	0	0	0	0	0	0	0	0	#DIV/0!	#DIV/0!	#DIV/0!	Core
0	0	0	0	0	0	0	0	0	0	0	0	0	0	#DIV/0!	#DIV/0!	#DIV/0!	Core
0	0	0	0	0	0	0	0	0	0	0	0	0	0	#DIV/0!	#DIV/0!	#DIV/0!	Core
0	0	0	0	0	0	0	0	0	0	0	0	0	0	#DIV/0!	#DIV/0!	#DIV/0!	Core
0	0	0	0	0	0	0	0	0	0	0	0	0	0	#DIV/0!	#DIV/0!	#DIV/0!	Core
0	0	0	0	0	0	0	0	0	0	0	0	0	0	#DIV/0!	#DIV/0!	#DIV/0!	Core
0	0	0	0	0	0	0	0	0	0	0	0	0	0	#DIV/0!	#DIV/0!	#DIV/0!	Core
0	0	0	0	0	0	0	0	0	0	0	0	0	0	#DIV/0!	#DIV/0!	#DIV/0!	Core
0	0	0	0	0	0	0	0	0	0	0	0	0	0	#DIV/0!	#DIV/0!	#DIV/0!	Core
0	0	0	0	0	0	0	0	0	0	0	0	0	0	#DIV/0!	#DIV/0!	#DIV/0!	Core
0	0	0	0	0	0	0	0	0	0	0	0	0	0	#DIV/0!	#DIV/0!	#DIV/0!	Core
0	0	0	0	0	0	0	0	0	0	0	0	0	0	#DIV/0!	#DIV/0!	#DIV/0!	Core
0	0	0	0	0	0	0	0	0	0	0	0	0	0	#DIV/0!	#DIV/0!	#DIV/0!	Core
0	0	0	0	0	0	0	0	0	0	0	0	0	0	#DIV/0!	#DIV/0!	#DIV/0!	Core
0	0	0	0	0	0	0	0	0	0	0	0	0	0	#DIV/0!	#DIV/0!	#DIV/0!	Core
0	0	0	0	0	0	0	0	0	0	0	0	0	0	#DIV/0!	#DIV/0!	#DIV/0!	Core
0	0	0	0	0	0	0	0	0	0	0	0	0	0	#DIV/0!	#DIV/0!	#DIV/0!	Core
0	0	0	0	0	0	0	0	0	0	0	0	0	0	#DIV/0!	#DIV/0!	#DIV/0!	Core
0	0	0	0	0	0	0	0	0	0	0	0	0	0	#DIV/0!	#DIV/0!	#DIV/0!	Core
0	0	0	0	0	0	0	0	0	0	0	0	0	0	#DIV/0!	#DIV/0!	#DIV/0!	Core
0	0	0	0	0	0	0	0	0	0	0	0	0	0	#DIV/0!	#DIV/0!	#DIV/0!	Core
0	0	0	0	0	0	0	0	0	0	0	0	0	0	#DIV/0!	#DIV/0!	#DIV/0!	Core
0	0	0	0	0	0	0	0	0	0	0	0	0	0	#DIV/0!	#DIV/0!	#DIV/0!	Core
0	0	0	0	0	0	0	0	0	0	0	0	0	0	#DIV/0!	#DIV/0!	#DIV/0!	Core
0	0	0	0	0	0	0	0	0	0	0	0	0	0	#DIV/0!	#DIV/0!	#DIV/0!	Core
0	0	0	0	0	0	0	0	0	0	0	0	0	0	#DIV/0!	#DIV/0!	#DIV/0!	Core
0	0	0	0	0	0	0	0	0	0	0	0	0	0	#DIV/0!	#DIV/0!	#DIV/0!	Core
0	0	0	0	0	0	0	0	0	0	0	0	0	0	#DIV/0!	#DIV/0!	#DIV/0!	Core
0	0	0	0	0	0	0	0	0	0	0	0	0	0	#DIV/0!	#DIV/0!	#DIV/0!	Core
0	0	0	0	0	0	0	0	0	0	0	0	0	0	#DIV/0!	#DIV/0!	#DIV/0!	Core
0	0	0	0	0	0	0	0	0	0	0	0	0	0	#DIV/0!	#DIV/0!	#DIV/0!	Core
0	0	0	0	0	0	0	0	0	0	0	0	0	0	#DIV/0!	#DIV/0!	#DIV/0!	Core
0	0	0	0	0	0	0	0	0	0	0	0	0	0	#DIV/0!	#DIV/0!	#DIV/0!	Core
0	0	0	0	0	0	0	0	0	0	0	0	0	0	#DIV/0!	#DIV/0!	#DIV/0!	Core
0	0	0	0	0	0	0	0	0	0	0	0	0	0	#DIV/0!	#DIV/0!	#DIV/0!	Core
0	0	0	0	0	0	0	0	0	0	0	0	0	0	#DIV/0!	#DIV/0!	#DIV/0!	Core
0	0	0	0	0	0	0	0	0	0	0	0	0	0	#DIV/0!	#DIV/0!	#DIV/0!	Core
0	0	0	0	0	0	0	0	0	0	0	0	0	0	#DIV/0!	#DIV/0!	#DIV/0!	Core
0	0	0	0	0	0	0	0	0	0	0	0	0	0	#DIV/0!	#DIV/0!	#DIV/0!	Core
0	0	0	0	0	0	0	0	0	0	0	0	0	0	#DIV/0!	#DIV/0!	#DIV/0!	Core
0	0	0	0	0	0	0	0	0	0	0	0	0	0	#DIV/0!	#DIV/0!	#DIV/0!	Core
0	0	0	0	0	0	0	0	0	0	0	0	0	0	#DIV/0!	#DIV/0!	#DIV/0!	Core
0	0	0	0	0	0	0	0	0	0	0	0	0	0	#DIV/0!	#DIV/0!	#DIV/0!	Core
0	0	0	0	0	0	0	0	0	0	0	0	0	0	#DIV/0!	#DIV/0!	#DIV/0!	Core
0	0	0	0	0	0	0	0	0	0	0	0	0	0	#DIV/0!	#DIV/0!	#DIV/0!	Core
0	0	0	0	0	0	0	0	0	0	0	0	0	0	#DIV/0!	#DIV/0!	#DIV/0!	Core
0	0	0	0	0	0	0	0	0	0	0	0	0	0	#DIV/0!	#DIV/0!	#DIV/0!	Core
0	0	0	0	0	0	0	0	0	0	0	0	0	0	#DIV/0!	#DIV/0!	#DIV/0!	Core
0	0	0	0	0	0	0	0	0	0	0	0	0	0	#DIV/0!	#DIV/0!	#DIV/0!	Core
0	0	0	0	0	0	0	0	0	0	0	0	0	0	#DIV/0!	#DIV/0!	#DIV/0!	Core
0	0	0	0	0	0	0	0	0	0	0	0	0	0	#DIV/0!	#DIV/0!	#DIV/0!	Core
0	0	0	0	0	0	0	0	0	0	0	0	0	0	#DIV/0!	#DIV/0!	#DIV/0!	Core
0	0	0	0	0	0	0	0	0	0	0	0	0	0	#DIV/0!	#DIV/0!	#DIV/0!	Core
0	0	0	0	0	0	0	0	0	0	0	0	0	0	#DIV/0!	#DIV/0!	#DIV/0!	Core
0	0	0	0	0	0	0	0	0	0	0	0	0	0	#DIV/0!	#DIV/0!	#DIV/0!	Core
0	0	0	0	0	0	0	0	0	0	0	0	0	0	#DIV/0!	#DIV/0!	#DIV/0!	Core
0	0	0	0	0	0	0	0	0	0	0	0	0	0	#DIV/0!	#DIV/0!	#DIV/0!	Core
0	0	0	0	0	0	0	0	0	0	0	0	0	0	#DIV/0!	#DIV/0!	#DIV/0!	Core
0	0	0	0	0	0	0	0	0	0	0	0	0	0	#DIV/0!	#DIV/0!	#DIV/0!	Core
0	0	0	0	0	0	0	0	0	0	0	0	0	0	#DIV/0!	#DIV/0!	#DIV/0!	Core
0	0	0	0	0	0	0	0	0	0	0	0	0	0	#DIV/0!	#DIV/0!	#DIV/0!	Core
0	0	0	0	0	0	0	0	0	0	0	0	0	0	#DIV/0!	#DIV/0!	#DIV/0!	Core
0	0	0	0	0	0	0	0	0	0	0	0	0	0	#DIV/0!	#DIV/0!	#DIV/0!	Core
0	0	0	0	0	0	0	0	0	0	0	0	0	0	#DIV/0!	#DIV/0!	#DIV/0!	Core
0	0	0	0	0	0	0	0	0	0	0	0	0	0	#DIV/0!	#DIV/0!	#DIV/0!	Core
0	0	0	0	0	0	0	0	0	0	0	0	0	0	#DIV/0!	#DIV/0!	#DIV/0!	Core
0	0	0	0	0	0	0	0	0	0	0	0	0	0	#DIV/0!	#DIV/0!	#DIV/0!	Core
0	0	0	0	0	0	0	0	0	0	0	0	0	0	#DIV/0!	#DIV/0!	#DIV/0!	Core
0	0	0	0	0	0	0	0	0	0	0	0	0	0	#DIV/0!	#DIV/0!	#DIV/0!	Core
0	0	0	0	0	0	0	0	0	0	0	0	0	0	#DIV/0!	#DIV/0!	#DIV/0!	Core
0	0	0	0	0	0	0	0	0	0	0	0	0	0	#DIV/0!	#DIV/0!	#DIV/0!	Core
0	0	0	0	0	0	0	0	0	0	0	0	0	0	#DIV/0!	#DIV/0!	#DIV/0!	Core
0	0	0	0	0	0	0	0	0	0	0	0	0	0	#DIV/0!	#DIV/0!	#DIV/0!	Core
0	0	0	0	0	0	0	0	0	0	0	0	0	0	#DIV/0!	#DIV/0!	#DIV/0!	Core
0	0	0	0	0	0	0	0	0	0	0	0	0	0	#DIV/0!	#DIV/0!	#DIV/0!	Core
0	0	0	0	0	0	0	0	0	0	0	0	0	0	#DIV/0!	#DIV/0!	#DIV/0!	Core
0	0	0	0	0	0	0	0	0	0	0	0	0	0	#DIV/0!	#DIV/0!	#DIV/0!	Core
0	0	0	0	0	0	0	0	0	0	0	0	0	0	#DIV/0!	#DIV/0!	#DIV/0!	Core
0	0	0	0	0	0	0	0	0	0	0	0	0	0	#DIV/0!	#DIV/0!	#DIV/0!	Core
0	0	0	0	0	0	0	0	0	0	0	0	0	0	#DIV/0!	#DIV/0!	#DIV/0!	Core
0	0	0	0	0	0	0	0	0	0	0	0	0	0	#DIV/0!	#DIV/0!	#DIV/0!	Core
0	0	0	0	0	0	0	0	0	0	0	0	0	0	#DIV/0!	#DIV/0!	#DIV/0!	Core
0	0	0	0	0	0	0	0	0	0	0	0	0	0	#DIV/0!	#DIV/0!	#DIV/0!	Core
0	0	0	0	0	0	0	0	0	0	0	0	0	0	#DIV/0!	#DIV/0!	#DIV/0!	Core
0	0	0	0	0	0	0	0	0	0	0	0	0	0	#DIV/0!	#DIV/0!	#DIV/0!	Core
0	0	0	0	0	0	0	0	0	0	0	0	0	0	#DIV/0!	#DIV/0!	#DIV/0!	Core
0	0	0	0	0	0	0	0	0	0	0	0	0	0	#DIV/0!	#DIV/0!	#DIV/0!	Core
0	0	0	0	0	0	0	0	0	0	0	0	0	0	#DIV/0!	#DIV/0!	#DIV/0!	Core
0	0	0	0	0	0	0	0	0	0	0	0	0	0	#DIV/0!	#DIV/0!	#DIV/0!	Core
0	0	0	0	0	0	0	0	0	0	0	0	0	0	#DIV/0!	#DIV/0!	#DIV/0!	Core
0	0	0	0	0	0	0	0	0	0	0	0	0	0	#DIV/0!	#DIV/0!	#DIV/0!	Core
0	0	0	0	0	0	0	0	0	0	0	0	0	0	#DIV/0!	#DIV/0!	#DIV/0!	Core
0	0	0	0	0	0	0	0	0	0	0	0	0	0	#DIV/0!	#DIV/0!	#DIV/0!	Core
0	0	0	0	0	0	0	0	0	0	0	0	0	0	#DIV/0!	#DIV/0!	#DIV/0!	Core
0	0	0	0	0	0	0	0	0	0	0	0	0	0	#DIV/0!	#DIV/0!	#DIV/0!	Core
0	0	0	0	0	0	0	0	0	0	0	0	0	0	#DIV/0!	#DIV/0!	#DIV/0!	Core
0	0	0	0	0	0	0	0	0	0	0	0	0	0	#DIV/0!	#DIV/0!	#DIV/0!	Core
0	0	0	0	0	0	0	0	0	0	0	0	0	0	#DIV/0!	#DIV/0!	#DIV/0!	Core
0	0	0	0	0	0	0	0	0	0	0	0	0	0	#DIV/0!	#DIV/0!	#DIV/0!	Core
0	0	0	0	0	0	0	0	0	0	0	0	0	0	#DIV/0!	#DIV/0!	#DIV/0!	Core
0	0	0	0	0	0	0	0	0	0	0	0	0	0	#DIV/0!	#DIV/0!	#DIV/0!	Core
0	0	0	0	0	0	0	0	0	0	0	0	0	0	#DIV/0!	#DIV/0!	#DIV/0!	Core
0	0	0	0	0	0	0	0	0	0	0	0	0	0	#DIV/0!	#DIV/0!	#DIV/0!	Core
0	0	0	0	0	0	0	0	0	0	0	0	0	0	#DIV/0!	#DIV/0!	#DIV/0!	Core
0	0	0	0	0	0	0	0	0	0	0	0	0	0	#DIV/0!	#DIV/0!	#DIV/0!	Core
0	0	0	0	0	0	0	0	0	0	0	0	0	0	#DIV/0!	#DIV/0!	#DIV/0!	Core
0	0	0	0	0	0	0	0	0	0	0	0	0	0	#DIV/0!	#DIV/0!	#DIV/0!	Core
0	0	0	0	0	0	0	0	0	0	0	0	0	0	#DIV/0!	#DIV/0!	#DIV/0!	Core
0	0	0	0	0	0	0	0	0	0	0	0	0	0	#DIV/0!	#DIV/0!	#DIV/0!	Core
0	0	0	0	0	0	0	0	0	0	0	0	0	0	#DIV/0!	#DIV/0!	#DIV/0!	Core
0	0	0	0	0	0	0	0	0	0	0	0	0	0	#DIV/0!	#DIV/0!	#DIV/0!	Core
0	0	0	0	0	0	0	0	0	0	0	0	0	0	#DIV/0!	#DIV/0!	#DIV/0!	Core
0	0	0	0	0	0	0	0	0	0	0	0	0	0	#DIV/0!	#DIV/0!	#DIV/0!	Core
0	0	0	0	0	0	0	0	0	0	0	0	0	0	#DIV/0!	#DIV/0!	#DIV/0!	Core
0	0	0	0	0	0	0	0	0	0	0	0	0	0	#DIV/0!	#DIV/0!	#DIV/0!	Core
0	0	0	0	0	0	0	0	0	0	0	0	0	0	#DIV/0!	#DIV/0!	#DIV/0!	Core
0	0	0	0	0	0	0	0	0	0	0	0	0	0	#DIV/0!	#DIV/0!	#DIV/0!	Core
0	0	0	0	0	0	0	0	0	0	0	0	0	0	#DIV/0!	#DIV/0!	#DIV/0!	Core
0	0	0	0	0	0	0	0	0	0	0	0	0	0	#DIV/0!	#DIV/0!	#DIV/0!	Core
0	0	0	0	0	0	0	0	0	0	0	0	0	0	#DIV/0!	#DIV/0!	#DIV/0!	Core
0	0	0	0	0	0	0	0	0	0	0	0	0	0	#DIV/0!	#DIV/0!	#DIV/0!	Core
0	0	0	0	0	0	0	0	0	0	0	0	0	0	#DIV/0!	#DIV/0!	#DIV/0!	Core
0	0	0	0	0	0	0	0	0	0	0	0	0	0	#DIV/0!	#DIV/0!	#DIV/0!	Core
0	0	0	0	0	0	0	0	0	0	0	0	0	0	#DIV/0!	#DIV/0!	#DIV/0!	Core
0	0	0	0	0	0	0	0	0	0	0	0	0	0	#DIV/0!	#DIV/0!	#DIV/0!	Core
0	0	0	0	0	0	0	0	0	0	0	0	0	0	#DIV/0!	#DIV/0!	#DIV/0!	Core
0	0	0	0	0	0	0	0	0	0	0	0	0	0	#DIV/0!	#DIV/0!	#DIV/0!	Core
0	0	0	0	0	0	0	0	0	0	0	0	0	0	#DIV/0!	#DIV/0!	#DIV/0!	Core
0	0	0	0	0	0	0	0	0	0	0	0	0	0	#DIV/0!	#DIV/0!	#DIV/0!	Core
0	0	0	0	0	0	0	0	0	0	0	0	0	0	#DIV/0!	#DIV/0!	#DIV/0!	Core
0	0	0	0	0	0	0	0	0	0	0	0	0	0	#DIV/0!	#DIV/0!	#DIV/0!	Core
0	0	0	0	0	0	0	0	0	0	0	0	0	0	#DIV/0!	#DIV/0!	#DIV/0!	Core
0	0	0	0	0	0	0	0	0	0	0	0	0	0	#DIV/0!	#DIV/0!	#DIV/0!	Core
0	0	0	0	0	0	0	0	0	0	0	0	0	0	#DIV/0!	#DIV/0!	#DIV/0!	Core
0	0	0	0	0	0	0	0	0	0	0	0	0	0	#DIV/0!	#DIV/0!	#DIV/0!	Core
0	0	0	0	0	0	0	0	0	0	0	0	0	0	#DIV/0!	#DIV/0!	#DIV/0!	Core
0	0	0	0	0	0	0	0	0	0	0	0	0	0	#DIV/0!	#DIV/0!	#DIV/0!	Core
0	0	0	0	0	0	0	0	0	0	0	0	0	0	#DIV/0!	#DIV/0!	#DIV/0!	Core
0	0	0	0	0	0	0	0	0	0	0	0	0	0	#DIV/0!	#DIV/0!	#DIV/0!	Core
0	0	0	0	0	0	0	0	0	0	0	0	0	0	#DIV/0!	#DIV/0!	#DIV/0!	Core
0	0	0	0	0	0	0	0	0	0	0	0	0	0	#DIV/0!	#DIV/0!	#DIV/0!	Core
0	0	0	0	0	0	0	0	0	0	0	0	0	0	#DIV/0!	#DIV/0!	#DIV/0!	Core
0	0	0	0	0	0	0	0	0	0	0	0	0	0	#DIV/0!	#DIV/0!	#DIV/0!	Core
0	0	0	0	0	0	0	0	0	0	0	0	0	0	#DIV/0!	#DIV/0!	#DIV/0!	Core
0	0	0	0	0	0	0	0	0	0	0	0	0	0	#DIV/0!	#DIV/0!	#DIV/0!	Core
0	0	0	0	0	0	0	0	0	0	0	0	0	0	#DIV/0!	#DIV/0!	#DIV/0!	Core
0	0	0	0	0	0	0	0	0	0	0	0	0	0	#DIV/0!	#DIV/0!	#DIV/0!	Core
0	0	0	0	0	0	0	0	0	0	0	0	0	0	#DIV/0!	#DIV/0!	#DIV/0!	Core
0	0	0	0	0	0	0	0	0	0	0	0	0	0	#DIV/0!	#DIV/0!	#DIV/0!	Core
0	0	0	0	0	0	0	0	0	0	0	0	0	0	#DIV/0!	#DIV/0!	#DIV/0!	Core
0	0	0	0	0	0	0	0	0	0	0	0	0	0	#DIV/0!	#DIV/0!	#DIV/0!	Core
0	0	0	0	0	0	0	0	0	0	0	0	0	0	#DIV/0!	#DIV/0!	#DIV/0!	Core
0	0	0	0	0	0	0	0	0	0	0	0	0	0	#DIV/0!	#DIV/0!	#DIV/0!	Core
0	0	0	0	0	0	0	0	0	0	0	0	0	0	#DIV/0!	#DIV/0!	#DIV/0!	Core
0	0	0	0	0	0	0	0	0	0	0	0	0	0	#DIV/0!	#DIV/0!	#DIV/0!	Core
0	0	0	0	0	0	0	0	0	0	0	0	0	0	#DIV/0!	#DIV/0!	#DIV/0!	Core
0	0	0	0	0	0	0	0	0	0	0	0	0	0	#DIV/0!	#DIV/0!	#DIV/0!	Core
0	0	0	0	0	0	0	0	0	0	0	0	0	0	#DIV/0!	#DIV/0!	#DIV/0!	Core
0	0	0	0	0	0	0	0	0	0	0	0	0	0	#DIV/0!	#DIV/0!	#DIV/0!	Core
0	0	0	0	0	0	0	0	0	0	0	0	0	0	#DIV/0!	#DIV/0!	#DIV/0!	Core
0	0	0	0	0	0	0	0	0	0	0	0	0	0	#DIV/0!	#DIV/0!	#DIV/0!	Core
0	0	0	0	0	0	0	0	0	0	0	0	0	0	#DIV/0!	#DIV/0!	#DIV/0!	Core
0	0	0	0	0	0	0	0	0	0	0	0	0	0	#DIV/0!	#DIV/0!	#DIV/0!	Core
0	0	0	0	0	0	0	0	0	0	0	0	0	0	#DIV/0!	#DIV/0!	#DIV/0!	Core
0	0	0	0	0	0	0	0	0	0	0	0	0	0	#DIV/0!	#DIV/0!	#DIV/0!	Core
0	0	0	0	0	0	0	0	0	0	0	0	0	0	#DIV/0!	#DIV/0!	#DIV/0!	Core
0	0	0	0	0	0	0	0	0	0	0	0	0	0	#DIV/0!	#DIV/0!	#DIV/0!	Core
0	0	0	0	0	0	0	0	0	0	0	0	0	0	#DIV/0!	#DIV/0!	#DIV/0!	Core
0	0	0	0	0	0	0	0	0	0	0	0	0	0	#DIV/0!	#DIV/0!	#DIV/0!	Core
0	0	0	0	0	0	0	0	0	0	0	0	0	0	#DIV/0!	#DIV/0!	#DIV/0!	Core
0	0	0	0	0	0	0	0	0	0	0	0	0	0	#DIV/0!	#DIV/0!	#DIV/0!	Core
0	0	0	0	0	0	0	0	0	0	0	0	0	0	#DIV/0!	#DIV/0!	#DIV/0!	Core
0	0	0	0	0	0	0	0	0	0	0	0	0	0	#DIV/0!	#DIV/0!	#DIV/0!	Core
0	0	0	0	0	0	0	0	0	0	0	0	0	0	#DIV/0!	#DIV/0!	#DIV/0!	Core
0	0	0	0	0	0	0	0	0	0	0	0	0	0	#DIV/0!	#DIV/0!	#DIV/0!	Core
0	0	0	0	0	0	0	0	0	0	0	0	0	0	#DIV/0!	#DIV/0!	#DIV/0!	Core
0	0	0	0	0	0	0	0	0	0	0	0	0	0	#DIV/0!	#DIV/0!	#DIV/0!	Core
0	0	0	0	0	0	0	0	0	0	0	0	0	0	#DIV/0!	#DIV/0!	#DIV/0!	Core
0	0	0	0	0	0	0	0	0	0	0	0	0	0	#DIV/0!	#DIV/0!	#DIV/0!	Core
0	0	0	0	0	0	0	0	0	0	0	0	0	0	#DIV/0!	#DIV/0!	#DIV/0!	Core
0	0	0	0	0	0	0	0	0	0	0	0	0	0	#DIV/0!	#DIV/0!	#DIV/0!	Core
0	0	0	0	0	0	0	0	0	0	0	0	0	0	#DIV/0!	#DIV/0!	#DIV/0!	Core
0	0	0	0	0	0	0	0	0	0	0	0	0	0	#DIV/0!	#DIV/0!	#DIV/0!	Core
0	0	0	0	0	0	0	0	0	0	0	0	0	0	#DIV/0!	#DIV/0!	#DIV/0!	Core
0	0	0	0	0	0	0	0	0	0	0	0	0	0	#DIV/0!	#DIV/0!	#DIV/0!	Core
0	0	0	0	0	0	0	0	0	0	0	0	0	0	#DIV/0!	#DIV/0!	#DIV/0!	Core
0	0	0	0	0	0	0	0	0	0	0	0	0	0	#DIV/0!	#DIV/0!	#DIV/0!	Core
0	0	0	0	0	0	0	0	0	0	0	0	0	0	#DIV/0!	#DIV/0!	#DIV/0!	Core
0	0	0	0	0	0	0	0	0	0	0	0	0	0	#DIV/0!	#DIV/0!	#DIV/0!	Core
0	0	0	0	0	0	0	0	0	0	0	0	0	0	#DIV/0!	#DIV/0!	#DIV/0!	Core
0	0	0	0	0	0	0	0	0	0	0	0	0	0	#DIV/0!	#DIV/0!	#DIV/0!	Core
0	0	0	0	0	0	0	0	0	0	0	0	0	0	#DIV/0!	#DIV/0!	#DIV/0!	Core
0	0	0	0	0	0	0	0	0	0	0	0	0	0	#DIV/0!	#DIV/0!	#DIV/0!	Core
0	0	0	0	0	0	0	0	0	0	0	0	0	0	#DIV/0!	#DIV/0!	#DIV/0!	Core
0	0	0	0	0	0	0	0	0	0	0	0	0	0	#DIV/0!	#DIV/0!	#DIV/0!	Core
0	0	0	0	0	0	0	0	0	0	0	0	0	0	#DIV/0!	#DIV/0!	#DIV/0!	Core
0	0	0	0	0	0	0	0	0	0	0	0	0	0	#DIV/0!	#DIV/0!	#DIV/0!	Core
0	0	0	0	0	0	0	0	0	0	0	0	0	0	#DIV/0!	#DIV/0!	#DIV/0!	Core
0	0	0	0	0	0	0	0	0	0	0	0	0	0	#DIV/0!	#DIV/0!	#DIV/0!	Core
0	0	0	0	0	0	0	0	0	0	0	0	0	0	#DIV/0!	#DIV/0!	#DIV/0!	Core
0	0	0	0	0	0	0	0	0	0	0	0	0	0	#DIV/0!	#DIV/0!	#DIV/0!	Core
0	0	0	0	0	0	0	0	0	0	0	0	0	0	#DIV/0!	#DIV/0!	#DIV/0!	Core
0	0	0	0	0	0	0	0	0	0	0	0	0	0	#DIV/0!	#DIV/0!	#DIV/0!	Core
0	0	0	0	0	0	0	0	0	0	0	0	0	0	#DIV/0!	#DIV/0!	#DIV/0!	Core
0	0	0	0	0	0	0	0	0	0	0	0	0	0	#DIV/0!	#DIV/0!	#DIV/0!	Core
0	0	0	0	0	0	0	0	0	0	0	0	0	0	#DIV/0!	#DIV/0!	#DIV/0!	Core
0	0	0	0	0	0	0	0	0	0	0	0	0	0	#DIV/0!	#DIV/0!	#DIV/0!	Core
0	0	0	0	0	0	0	0	0	0	0	0	0	0	#DIV/0!	#DIV/0!	#DIV/0!	Core
0	0	0	0	0	0	0	0	0	0	0	0	0	0	#DIV/0!	#DIV/0!	#DIV/0!	Core
0	0	0	0	0	0	0	0	0	0	0	0	0	0	#DIV/0!	#DIV/0!	#DIV/0!	Core
0	0	0	0	0	0	0	0	0	0	0	0	0	0	#DIV/0!	#DIV/0!	#DIV/0!	Core
0	0	0	0	0	0	0	0	0	0	0	0	0	0	#DIV/0!	#DIV/0!	#DIV/0!	Core
0	0	0	0	0	0	0	0	0	0	0	0	0	0	#DIV/0!	#DIV/0!	#DIV/0!	Core
0	0	0	0	0	0	0	0	0	0	0	0	0	0	#DIV/0!	#DIV/0!	#DIV/0!	Core
0	0	0	0	0	0	0	0	0	0	0	0	0	0	#DIV/0!	#DIV/0!	#DIV/0!	Core
0	0	0	0	0	0	0	0	0	0	0	0	0	0	#DIV/0!	#DIV/0!	#DIV/0!	Core
0	0	0	0	0	0	0	0	0	0	0	0	0	0	#DIV/0!	#DIV/0!	#DIV/0!	Core
0	0	0	0	0	0	0	0	0	0	0	0	0	0	#DIV/0!	#DIV/0!	#DIV/0!	Core
0	0	0	0	0	0	0	0	0	0	0	0	0	0	#DIV/0!	#DIV/0!	#DIV/0!	Core
0	0	0	0	0	0	0	0	0	0	0	0	0	0	#DIV/0!	#DIV/0!	#DIV/0!	Core
0	0	0	0	0	0	0	0	0	0	0	0	0	0	#DIV/0!	#DIV/0!	#DIV/0!	Core
0	0	0	0	0	0	0	0	0	0	0	0	0	0	#DIV/0!	#DIV/0!	#DIV/0!	Core
0	0	0	0	0	0	0	0	0	0	0	0	0	0	#DIV/0!	#DIV/0!	#DIV/0!	Core
0	0	0	0	0	0	0	0	0	0	0	0	0	0	#DIV/0!	#DIV/0!	#DIV/0!	Core
0	0	0	0	0	0	0	0	0	0	0	0	0	0	#DIV/0!	#DIV/0!	#DIV/0!	Core
0	0	0	0	0	0	0	0	0	0	0	0	0	0	#DIV/0!	#DIV/0!	#DIV/0!	Core
0	0	0	0	0	0	0	0	0	0	0	0	0	0	#DIV/0!	#DIV/0!	#DIV/0!	Core
0	0	0	0	0	0	0	0	0	0	0	0	0	0	#DIV/0!	#DIV/0!	#DIV/0!	Core
0	0	0	0	0	0	0	0	0	0	0	0	0	0	#DIV/0!	#DIV/0!	#DIV/0!	Core
0	0	0	0	0	0	0	0	0	0	0	0	0	0	#DIV/0!	#DIV/0!	#DIV/0!	Core
0	0	0	0	0	0	0	0	0	0	0	0	0	0	#DIV/0!	#DIV/0!	#DIV/0!	Core
0	0	0	0	0	0	0	0	0	0	0	0	0	0	#DIV/0!	#DIV/0!	#DIV/0!	Core
0	0	0	0	0	0	0	0	0	0	0	0	0	0	#DIV/0!	#DIV/0!	#DIV/0!	Core
0	0	0	0	0	0	0	0	0	0	0	0	0	0	#DIV/0!	#DIV/0!	#DIV/0!	Core
0	0	0	0	0	0	0	0	0	0	0	0	0	0	#DIV/0!	#DIV/0!	#DIV/0!	Core
0	0	0	0	0	0	0	0	0	0	0	0	0	0	#DIV/0!	#DIV/0!	#DIV/0!	Core
0	0	0	0	0	0	0	0	0	0	0	0	0	0	#DIV/0!	#DIV/0!	#DIV/0!	Core
0	0	0	0	0	0	0	0	0	0	0	0	0	0	#DIV/0!	#DIV/0!	#DIV/0!	Core
0	0	0	0	0	0	0	0	0	0	0	0	0	0	#DIV/0!	#DIV/0!	#DIV/0!	Core
0	0	0	0	0	0	0	0	0	0	0	0	0	0	#DIV/0!	#DIV/0!	#DIV/0!	Core
0	0	0	0	0	0	0	0	0	0	0	0	0	0	#DIV/0!	#DIV/0!	#DIV/0!	Core
0	0	0	0	0	0	0	0	0	0	0	0	0	0	#DIV/0!	#DIV/0!	#DIV/0!	Core
0	0	0	0	0	0	0	0	0	0	0	0	0	0	#DIV/0!	#DIV/0!	#DIV/0!	Core
0	0	0	0	0	0	0	0	0	0	0	0	0	0	#DIV/0!	#DIV/0!	#DIV/0!	Core
0	0	0	0	0	0	0	0	0	0	0	0	0	0	#DIV/0!	#DIV/0!	#DIV/0!	Core
0	0	0	0	0	0	0	0	0	0	0	0	0	0	#DIV/0!	#DIV/0!	#DIV/0!	Core
0	0	0	0	0	0	0	0	0	0	0	0	0	0	#DIV/0!	#DIV/0!	#DIV/0!	Core
0	0	0	0	0	0	0	0	0	0	0	0	0	0	#DIV/0!	#DIV/0!	#DIV/0!	Core
0	0	0	0	0	0	0	0	0	0	0	0	0	0	#DIV/0!	#DIV/0!	#DIV/0!	Core
0	0	0	0	0	0	0	0	0	0	0	0	0	0	#DIV/0!	#DIV/0!	#DIV/0!	Core
0	0	0	0	0	0	0	0	0	0	0	0	0	0	#DIV/0!	#DIV/0!	#DIV/0!	Core
0	0	0	0	0	0	0	0	0	0	0	0	0	0	#DIV/0!	#DIV/0!	#DIV/0!	Core
0	0	0	0	0	0	0	0	0	0	0	0	0	0	#DIV/0!	#DIV/0!	#DIV/0!	Core
0	0	0	0	0	0	0	0	0	0	0	0	0	0	#DIV/0!	#DIV/0!	#DIV/0!	Core
0	0	0	0	0	0	0	0	0	0	0	0	0	0	#DIV/0!	#DIV/0!	#DIV/0!	Core
0	0	0	0	0	0	0	0	0	0	0	0	0	0	#DIV/0!	#DIV/0!	#DIV/0!	Core
0	0	0	0	0	0	0	0	0	0	0	0	0	0	#DIV/0!	#DIV/0!	#DIV/0!	Core
0	0	0	0	0	0	0	0	0	0	0	0	0	0	#DIV/0!	#DIV/0!	#DIV/0!	Core
0	0	0	0	0	0	0	0	0	0	0	0	0	0	#DIV/0!	#DIV/0!	#DIV/0!	Core
0	0	0	0	0	0	0	0	0	0	0	0	0	0	#DIV/0!	#DIV/0!	#DIV/0!	Core
0	0	0	0	0	0	0	0	0	0	0	0	0	0	#DIV/0!	#DIV/0!	#DIV/0!	Core
0	0	0	0	0	0	0	0	0	0	0	0	0	0	#DIV/0!	#DIV/0!	#DIV/0!	Core
0	0	0	0	0	0	0	0	0	0	0	0	0	0	#DIV/0!	#DIV/0!	#DIV/0!	Core
0	0	0	0	0	0	0	0	0	0	0	0	0	0	#DIV/0!	#DIV/0!	#DIV/0!	Core
0	0	0	0	0	0	0	0	0	0	0	0	0	0	#DIV/0!	#DIV/0!	#DIV/0!	Core
0	0	0	0	0	0	0	0	0	0	0	0	0	0	#DIV/0!	#DIV/0!	#DIV/0!	Core
0	0	0	0	0	0	0	0	0	0	0	0	0	0	#DIV/0!	#DIV/0!	#DIV/0!	Core
0	0	0	0	0	0	0	0	0	0	0	0	0	0	#DIV/0!	#DIV/0!	#DIV/0!	Core
0	0	0	0	0	0	0	0	0	0	0	0	0	0	#DIV/0!	#DIV/0!	#DIV/0!	Core
0	0	0	0	0	0	0	0	0	0	0	0	0	0	#DIV/0!	#DIV/0!	#DIV/0!	Core
0	0	0	0	0	0	0	0	0	0	0	0	0	0	#DIV/0!	#DIV/0!	#DIV/0!	Core
0	0	0	0	0	0	0	0	0	0	0	0	0	0	#DIV/0!	#DIV/0!	#DIV/0!	Core
0	0	0	0	0	0	0	0	0	0	0	0	0	0	#DIV/0!	#DIV/0!	#DIV/0!	Core
0	0	0	0	0	0	0	0	0	0	0	0	0	0	#DIV/0!	#DIV/0!	#DIV/0!	Core
0	0	0	0	0	0	0	0	0	0	0	0	0	0	#DIV/0!	#DIV/0!	#DIV/0!	Core
0	0	0	0	0	0	0	0	0	0	0	0	0	0	#DIV/0!	#DIV/0!	#DIV/0!	Core
0	0	0	0	0	0	0	0	0	0	0	0	0	0	#DIV/0!	#DIV/0!	#DIV/0!	Core
0	0	0	0	0	0	0	0	0	0	0	0	0	0	#DIV/0!	#DIV/0!	#DIV/0!	Core
0	0	0	0	0	0	0	0	0	0	0	0	0	0	#DIV/0!	#DIV/0!	#DIV/0!	Core
0	0	0	0	0	0	0	0	0	0	0	0	0	0	#DIV/0!	#DIV/0!	#DIV/0!	Core
0	0	0	0	0	0	0	0	0	0	0	0	0	0	#DIV/0!	#DIV/0!	#DIV/0!	Core
0	0	0	0	0	0	0	0	0	0	0	0	0	0	#DIV/0!	#DIV/0!	#DIV/0!	Core
0	0	0	0	0	0	0	0	0	0	0	0	0	0	#DIV/0!	#DIV/0!	#DIV/0!	Core
0	0	0	0	0	0	0	0	0	0	0	0	0	0	#DIV/0!	#DIV/0!	#DIV/0!	Core
0	0	0	0	0	0	0	0	0	0	0	0	0	0	#DIV/0!	#DIV/0!	#DIV/0!	Core
0	0	0	0	0	0	0	0	0	0	0	0	0	0	#DIV/0!	#DIV/0!	#DIV/0!	Core
0	0	0	0	0	0	0	0	0	0	0	0	0	0	#DIV/0!	#DIV/0!	#DIV/0!	Core
0	0	0	0	0	0	0	0	0	0	0	0	0	0	#DIV/0!	#DIV/0!	#DIV/0!	Core
0	0	0	0	0	0	0	0	0	0	0	0	0	0	#DIV/0!	#DIV/0!	#DIV/0!	Core
0	0	0	0	0	0	0	0	0	0	0	0	0	0	#DIV/0!	#DIV/0!	#DIV/0!	Core
0	0	0	0	0	0	0	0	0	0	0	0	0	0	#DIV/0!	#DIV/0!	#DIV/0!	Core
0	0	0	0	0	0	0	0	0	0	0	0	0	0	#DIV/0!	#DIV/0!	#DIV/0!	Core
0	0	0	0	0	0	0	0	0	0	0	0	0	0	#DIV/0!	#DIV/0!	#DIV/0!	Core
0	0	0	0	0	0	0	0	0	0	0	0	0	0	#DIV/0!	#DIV/0!	#DIV/0!	Core
0	0	0	0	0	0	0	0	0	0	0	0	0	0	#DIV/0!	#DIV/0!	#DIV/0!	Core
0	0	0	0	0	0	0	0	0	0	0	0	0	0	#DIV/0!	#DIV/0!	#DIV/0!	Core
0	0	0	0	0	0	0	0	0	0	0	0	0	0	#DIV/0!	#DIV/0!	#DIV/0!	Core
0	0	0	0	0	0	0	0	0	0	0	0	0	0	#DIV/0!	#DIV/0!	#DIV/0!	Core
0	0	0	0	0	0	0	0	0	0	0	0	0	0	#DIV/0!	#DIV/0!	#DIV/0!	Core
0	0	0	0	0	0	0	0	0	0	0	0	0	0	#DIV/0!	#DIV/0!	#DIV/0!	Core
0	0	0	0	0	0	0	0	0	0	0	0	0	0	#DIV/0!	#DIV/0!	#DIV/0!	Core
0	0	0	0	0	0	0	0	0	0	0	0	0	0	#DIV/0!	#DIV/0!	#DIV/0!	Core
0	0	0	0	0	0	0	0	0	0	0	0	0	0	#DIV/0!	#DIV/0!	#DIV/0!	Core
0	0	0	0	0	0	0	0	0	0	0	0	0	0	#DIV/0!	#DIV/0!	#DIV/0!	Core
0	0	0	0	0	0	0	0	0	0	0	0	0	0	#DIV/0!	#DIV/0!	#DIV/0!	Core
0	0	0	0	0	0	0	0	0	0	0	0	0	0	#DIV/0!	#DIV/0!	#DIV/0!	Core
0	0	0	0	0	0	0	0	0	0	0	0	0	0	#DIV/0!	#DIV/0!	#DIV/0!	Core
0	0	0	0	0	0	0	0	0	0	0	0	0	0	#DIV/0!	#DIV/0!	#DIV/0!	Core
0	0	0	0	0	0	0	0	0	0	0	0	0	0	#DIV/0!	#DIV/0!	#DIV/0!	Core
0	0	0	0	0	0	0	0	0	0	0	0	0	0	#DIV/0!	#DIV/0!	#DIV/0!	Core
0	0	0	0	0	0	0	0	0	0	0	0	0	0	#DIV/0!	#DIV/0!	#DIV/0!	Core
0	0	0	0	0	0	0	0	0	0	0	0	0	0	#DIV/0!	#DIV/0!	#DIV/0!	Core
0	0	0	0	0	0	0	0	0	0	0	0	0	0	#DIV/0!	#DIV/0!	#DIV/0!	Core
0	0	0	0	0	0	0	0	0	0	0	0	0	0	#DIV/0!	#DIV/0!	#DIV/0!	Core
0	0	0	0	0	0	0	0	0	0	0	0	0	0	#DIV/0!	#DIV/0!	#DIV/0!	Core
0	0	0	0	0	0	0	0	0	0	0	0	0	0	#DIV/0!	#DIV/0!	#DIV/0!	Core
0	0	0	0	0	0	0	0	0	0	0	0	0	0	#DIV/0!	#DIV/0!	#DIV/0!	Core
0	0	0	0	0	0	0	0	0	0	0	0	0	0	#DIV/0!	#DIV/0!	#DIV/0!	Core
0	0	0	0	0	0	0	0	0	0	0	0	0	0	#DIV/0!	#DIV/0!	#DIV/0!	Core
0	0	0	0	0	0	0	0	0	0	0	0	0	0	#DIV/0!	#DIV/0!	#DIV/0!	Core
0	0	0	0	0	0	0	0	0	0	0	0	0	0	#DIV/0!	#DIV/0!	#DIV/0!	Core
0	0	0	0	0	0	0	0	0	0	0	0	0	0	#DIV/0!	#DIV/0!	#DIV/0!	Core
0	0	0	0	0	0	0	0	0	0	0	0	0	0	#DIV/0!	#DIV/0!	#DIV/0!	Core
0	0	0	0	0	0	0	0	0	0	0	0	0	0	#DIV/0!	#DIV/0!	#DIV/0!	Core
0	0	0	0	0	0	0	0	0	0	0	0	0	0	#DIV/0!	#DIV/0!	#DIV/0!	Core
0	0	0	0	0	0	0	0	0	0	0	0	0	0	#DIV/0!	#DIV/0!	#DIV/0!	Core
0	0	0	0	0	0	0	0	0	0	0	0	0	0	#DIV/0!	#DIV/0!	#DIV/0!	Core
0	0	0	0	0	0	0	0	0	0	0	0	0	0	#DIV/0!	#DIV/0!	#DIV/0!	Core
0	0	0	0	0	0	0	0	0	0	0	0	0	0	#DIV/0!	#DIV/0!	#DIV/0!	Core
0	0	0	0	0	0	0	0	0	0	0	0	0	0	#DIV/0!	#DIV/0!	#DIV/0!	Core
0	0	0	0	0	0	0	0	0	0	0	0	0	0	#DIV/0!	#DIV/0!	#DIV/0!	Core
0	0	0	0	0	0	0	0	0	0	0	0	0	0	#DIV/0!	#DIV/0!	#DIV/0!	Core
0	0	0	0	0	0	0	0	0	0	0	0	0	0	#DIV/0!	#DIV/0!	#DIV/0!	Core
0	0	0	0	0	0	0	0	0	0	0	0	0	0	#DIV/0!	#DIV/0!	#DIV/0!	Core
0	0	0	0	0	0	0	0	0	0	0	0	0	0	#DIV/0!	#DIV/0!	#DIV/0!	Core
0	0	0	0	0	0	0	0	0	0	0	0	0	0	#DIV/0!	#DIV/0!	#DIV/0!	Core
0	0	0	0	0	0	0	0	0	0	0	0	0	0	#DIV/0!	#DIV/0!	#DIV/0!	Core
0	0	0	0	0	0	0	0	0	0	0	0	0	0	#DIV/0!	#DIV/0!	#DIV/0!	Core
0	0	0	0	0	0	0	0	0	0	0	0	0	0	#DIV/0!	#DIV/0!	#DIV/0!	Core
0	0	0	0	0	0	0	0	0	0	0	0	0	0	#DIV/0!	#DIV/0!	#DIV/0!	Core
0	0	0	0	0	0	0	0	0	0	0	0	0	0	#DIV/0!	#DIV/0!	#DIV/0!	Core
0	0	0	0	0	0	0	0	0	0	0	0	0	0	#DIV/0!	#DIV/0!	#DIV/0!	Core
0	0	0	0	0	0	0	0	0	0	0	0	0	0	#DIV/0!	#DIV/0!	#DIV/0!	Core
0	0	0	0	0	0	0	0	0	0	0	0	0	0	#DIV/0!	#DIV/0!	#DIV/0!	Core
0	0	0	0	0	0	0	0	0	0	0	0	0	0	#DIV/0!	#DIV/0!	#DIV/0!	Core
0	0	0	0	0	0	0	0	0	0	0	0	0	0	#DIV/0!	#DIV/0!	#DIV/0!	Core
0	0	0	0	0	0	0	0	0	0	0	0	0	0	#DIV/0!	#DIV/0!	#DIV/0!	Core
0	0	0	0	0	0	0	0	0	0	0	0	0	0	#DIV/0!	#DIV/0!	#DIV/0!	Core
0	0	0	0	0	0	0	0	0	0	0	0	0	0	#DIV/0!	#DIV/0!	#DIV/0!	Core
0	0	0	0	0	0	0	0	0	0	0	0	0	0	#DIV/0!	#DIV/0!	#DIV/0!	Core
0	0	0	0	0	0	0	0	0	0	0	0	0	0	#DIV/0!	#DIV/0!	#DIV/0!	Core
0	0	0	0	0	0	0	0	0	0	0	0	0	0	#DIV/0!	#DIV/0!	#DIV/0!	Core
0	0	0	0	0	0	0	0	0	0	0	0	0	0	#DIV/0!	#DIV/0!	#DIV/0!	Core
0	0	0	0	0	0	0	0	0	0	0	0	0	0	#DIV/0!	#DIV/0!	#DIV/0!	Core
0	0	0	0	0	0	0	0	0	0	0	0	0	0	#DIV/0!	#DIV/0!	#DIV/0!	Core
0	0	0	0	0	0	0	0	0	0	0	0	0	0	#DIV/0!	#DIV/0!	#DIV/0!	Core
0	0	0	0	0	0	0	0	0	0	0	0	0	0	#DIV/0!	#DIV/0!	#DIV/0!	Core
0	0	0	0	0	0	0	0	0	0	0	0	0	0	#DIV/0!	#DIV/0!	#DIV/0!	Core
0	0	0	0	0	0	0	0	0	0	0	0	0	0	#DIV/0!	#DIV/0!	#DIV/0!	Core
0	0	0	0	0	0	0	0	0	0	0	0	0	0	#DIV/0!	#DIV/0!	#DIV/0!	Core
0	0	0	0	0	0	0	0	0	0	0	0	0	0	#DIV/0!	#DIV/0!	#DIV/0!	Core
0	0	0	0	0	0	0	0	0	0	0	0	0	0	#DIV/0!	#DIV/0!	#DIV/0!	Core
0	0	0	0	0	0	0	0	0	0	0	0	0	0	#DIV/0!	#DIV/0!	#DIV/0!	Core
0	0	0	0	0	0	0	0	0	0	0	0	0	0	#DIV/0!	#DIV/0!	#DIV/0!	Core
0	0	0	0	0	0	0	0	0	0	0	0	0	0	#DIV/0!	#DIV/0!	#DIV/0!	Core
0	0	0	0	0	0	0	0	0	0	0	0	0	0	#DIV/0!	#DIV/0!	#DIV/0!	Core
0	0	0	0	0	0	0	0	0	0	0	0	0	0	#DIV/0!	#DIV/0!	#DIV/0!	Core
0	0	0	0	0	0	0	0	0	0	0	0	0	0	#DIV/0!	#DIV/0!	#DIV/0!	Core
0	0	0	0	0	0	0	0	0	0	0	0	0	0	#DIV/0!	#DIV/0!	#DIV/0!	Core
0	0	0	0	0	0	0	0	0	0	0	0	0	0	#DIV/0!	#DIV/0!	#DIV/0!	Core
0	0	0	0	0	0	0	0	0	0	0	0	0	0	#DIV/0!	#DIV/0!	#DIV/0!	Core
0	0	0	0	0	0	0	0	0	0	0	0	0	0	#DIV/0!	#DIV/0!	#DIV/0!	Core
0	0	0	0	0	0	0	0	0	0	0	0	0	0	#DIV/0!	#DIV/0!	#DIV/0!	Core
0	0	0	0	0	0	0	0	0	0	0	0	0	0	#DIV/0!	#DIV/0!	#DIV/0!	Core
0	0	0	0	0	0	0	0	0	0	0	0	0	0	#DIV/0!	#DIV/0!	#DIV/0!	Core
0	0	0	0	0	0	0	0	0	0	0	0	0	0	#DIV/0!	#DIV/0!	#DIV/0!	Core
0	0	0	0	0	0	0	0	0	0	0	0	0	0	#DIV/0!	#DIV/0!	#DIV/0!	Core
0	0	0	0	0	0	0	0	0	0	0	0	0	0	#DIV/0!	#DIV/0!	#DIV/0!	Core
0	0	0	0	0	0	0	0	0	0	0	0	0	0	#DIV/0!	#DIV/0!	#DIV/0!	Core
0	0	0	0	0	0	0	0	0	0	0	0	0	0	#DIV/0!	#DIV/0!	#DIV/0!	Core
0	0	0	0	0	0	0	0	0	0	0	0	0	0	#DIV/0!	#DIV/0!	#DIV/0!	Core
0	0	0	0	0	0	0	0	0	0	0	0	0	0	#DIV/0!	#DIV/0!	#DIV/0!	Core
0	0	0	0	0	0	0	0	0	0	0	0	0	0	#DIV/0!	#DIV/0!	#DIV/0!	Core
0	0	0	0	0	0	0	0	0	0	0	0	0	0	#DIV/0!	#DIV/0!	#DIV/0!	Core
0	0	0	0	0	0	0	0	0	0	0	0	0	0	#DIV/0!	#DIV/0!	#DIV/0!	Core
0	0	0	0	0	0	0	0	0	0	0	0	0	0	#DIV/0!	#DIV/0!	#DIV/0!	Core
0	0	0	0	0	0	0	0	0	0	0	0	0	0	#DIV/0!	#DIV/0!	#DIV/0!	Core
0	0	0	0	0	0	0	0	0	0	0	0	0	0	#DIV/0!	#DIV/0!	#DIV/0!	Core
0	0	0	0	0	0	0	0	0	0	0	0	0	0	#DIV/0!	#DIV/0!	#DIV/0!	Core
0	0	0	0	0	0	0	0	0	0	0	0	0	0	#DIV/0!	#DIV/0!	#DIV/0!	Core
0	0	0	0	0	0	0	0	0	0	0	0	0	0	#DIV/0!	#DIV/0!	#DIV/0!	Core
0	0	0	0	0	0	0	0	0	0	0	0	0	0	#DIV/0!	#DIV/0!	#DIV/0!	Core
0	0	0	0	0	0	0	0	0	0	0	0	0	0	#DIV/0!	#DIV/0!	#DIV/0!	Core
0	0	0	0	0	0	0	0	0	0	0	0	0	0	#DIV/0!	#DIV/0!	#DIV/0!	Core
0	0	0	0	0	0	0	0	0	0	0	0	0	0	#DIV/0!	#DIV/0!	#DIV/0!	Core
0	0	0	0	0	0	0	0	0	0	0	0	0	0	#DIV/0!	#DIV/0!	#DIV/0!	Core
0	0	0	0	0	0	0	0	0	0	0	0	0	0	#DIV/0!	#DIV/0!	#DIV/0!	Core
0	0	0	0	0	0	0	0	0	0	0	0	0	0	#DIV/0!	#DIV/0!	#DIV/0!	Core
0	0	0	0	0	0	0	0	0	0	0	0	0	0	#DIV/0!	#DIV/0!	#DIV/0!	Core
0	0	0	0	0	0	0	0	0	0	0	0	0	0	#DIV/0!	#DIV/0!	#DIV/0!	Core
0	0	0	0	0	0	0	0	0	0	0	0	0	0	#DIV/0!	#DIV/0!	#DIV/0!	Core
0	0	0	0	0	0	0	0	0	0	0	0	0	0	#DIV/0!	#DIV/0!	#DIV/0!	Core
0	0	0	0	0	0	0	0	0	0	0	0	0	0	#DIV/0!	#DIV/0!	#DIV/0!	Core
0	0	0	0	0	0	0	0	0	0	0	0	0	0	#DIV/0!	#DIV/0!	#DIV/0!	Core
0	0	0	0	0	0	0	0	0	0	0	0	0	0	#DIV/0!	#DIV/0!	#DIV/0!	Core
0	0	0	0	0	0	0	0	0	0	0	0	0	0	#DIV/0!	#DIV/0!	#DIV/0!	Core
0	0	0	0	0	0	0	0	0	0	0	0	0	0	#DIV/0!	#DIV/0!	#DIV/0!	Core
0	0	0	0	0	0	0	0	0	0	0	0	0	0	#DIV/0!	#DIV/0!	#DIV/0!	Core
0	0	0	0	0	0	0	0	0	0	0	0	0	0	#DIV/0!	#DIV/0!	#DIV/0!	Core
0	0	0	0	0	0	0	0	0	0	0	0	0	0	#DIV/0!	#DIV/0!	#DIV/0!	Core
0	0	0	0	0	0	0	0	0	0	0	0	0	0	#DIV/0!	#DIV/0!	#DIV/0!	Core
0	0	0	0	0	0	0	0	0	0	0	0	0	0	#DIV/0!	#DIV/0!	#DIV/0!	Core
0	0	0	0	0	0	0	0	0	0	0	0	0	0	#DIV/0!	#DIV/0!	#DIV/0!	Core
0	0	0	0	0	0	0	0	0	0	0	0	0	0	#DIV/0!	#DIV/0!	#DIV/0!	Core
0	0	0	0	0	0	0	0	0	0	0	0	0	0	#DIV/0!	#DIV/0!	#DIV/0!	Core
0	0	0	0	0	0	0	0	0	0	0	0	0	0	#DIV/0!	#DIV/0!	#DIV/0!	Core
0	0	0	0	0	0	0	0	0	0	0	0	0	0	#DIV/0!	#DIV/0!	#DIV/0!	Core
0	0	0	0	0	0	0	0	0	0	0	0	0	0	#DIV/0!	#DIV/0!	#DIV/0!	Core
0	0	0	0	0	0	0	0	0	0	0	0	0	0	#DIV/0!	#DIV/0!	#DIV/0!	Core
0	0	0	0	0	0	0	0	0	0	0	0	0	0	#DIV/0!	#DIV/0!	#DIV/0!	Core
0	0	0	0	0	0	0	0	0	0	0	0	0	0	#DIV/0!	#DIV/0!	#DIV/0!	Core
0	0	0	0	0	0	0	0	0	0	0	0	0	0	#DIV/0!	#DIV/0!	#DIV/0!	Core
0	0	0	0	0	0	0	0	0	0	0	0	0	0	#DIV/0!	#DIV/0!	#DIV/0!	Core
0	0	0	0	0	0	0	0	0	0	0	0	0	0	#DIV/0!	#DIV/0!	#DIV/0!	Core
0	0	0	0	0	0	0	0	0	0	0	0	0	0	#DIV/0!	#DIV/0!	#DIV/0!	Core
0	0	0	0	0	0	0	0	0	0	0	0	0	0	#DIV/0!	#DIV/0!	#DIV/0!	Core
0	0	0	0	0	0	0	0	0	0	0	0	0	0	#DIV/0!	#DIV/0!	#DIV/0!	Core
0	0	0	0	0	0	0	0	0	0	0	0	0	0	#DIV/0!	#DIV/0!	#DIV/0!	Core
0	0	0	0	0	0	0	0	0	0	0	0	0	0	#DIV/0!	#DIV/0!	#DIV/0!	Core
0	0	0	0	0	0	0	0	0	0	0	0	0	0	#DIV/0!	#DIV/0!	#DIV/0!	Core
0	0	0	0	0	0	0	0	0	0	0	0	0	0	#DIV/0!	#DIV/0!	#DIV/0!	Core
0	0	0	0	0	0	0	0	0	0	0	0	0	0	#DIV/0!	#DIV/0!	#DIV/0!	Core
0	0	0	0	0	0	0	0	0	0	0	0	0	0	#DIV/0!	#DIV/0!	#DIV/0!	Core
0	0	0	0	0	0	0	0	0	0	0	0	0	0	#DIV/0!	#DIV/0!	#DIV/0!	Core
0	0	0	0	0	0	0	0	0	0	0	0	0	0	#DIV/0!	#DIV/0!	#DIV/0!	Core
0	0	0	0	0	0	0	0	0	0	0	0	0	0	#DIV/0!	#DIV/0!	#DIV/0!	Core
0	0	0	0	0	0	0	0	0	0	0	0	0	0	#DIV/0!	#DIV/0!	#DIV/0!	Core
0	0	0	0	0	0	0	0	0	0	0	0	0	0	#DIV/0!	#DIV/0!	#DIV/0!	Core
0	0	0	0	0	0	0	0	0	0	0	0	0	0	#DIV/0!	#DIV/0!	#DIV/0!	Core
0	0	0	0	0	0	0	0	0	0	0	0	0	0	#DIV/0!	#DIV/0!	#DIV/0!	Core
0	0	0	0	0	0	0	0	0	0	0	0	0	0	#DIV/0!	#DIV/0!	#DIV/0!	Core
0	0	0	0	0	0	0	0	0	0	0	0	0	0	#DIV/0!	#DIV/0!	#DIV/0!	Core
0	0	0	0	0	0	0	0	0	0	0	0	0	0	#DIV/0!	#DIV/0!	#DIV/0!	Core
0	0	0	0	0	0	0	0	0	0	0	0	0	0	#DIV/0!	#DIV/0!	#DIV/0!	Core
0	0	0	0	0	0	0	0	0	0	0	0	0	0	#DIV/0!	#DIV/0!	#DIV/0!	Core
0	0	0	0	0	0	0	0	0	0	0	0	0	0	#DIV/0!	#DIV/0!	#DIV/0!	Core
0	0	0	0	0	0	0	0	0	0	0	0	0	0	#DIV/0!	#DIV/0!	#DIV/0!	Core
0	0	0	0	0	0	0	0	0	0	0	0	0	0	#DIV/0!	#DIV/0!	#DIV/0!	Core
0	0	0	0	0	0	0	0	0	0	0	0	0	0	#DIV/0!	#DIV/0!	#DIV/0!	Core
0	0	0	0	0	0	0	0	0	0	0	0	0	0	#DIV/0!	#DIV/0!	#DIV/0!	Core
0	0	0	0	0	0	0	0	0	0	0	0	0	0	#DIV/0!	#DIV/0!	#DIV/0!	Core
0	0	0	0	0	0	0	0	0	0	0	0	0	0	#DIV/0!	#DIV/0!	#DIV/0!	Core
0	0	0	0	0	0	0	0	0	0	0	0	0	0	#DIV/0!	#DIV/0!	#DIV/0!	Core
0	0	0	0	0	0	0	0	0	0	0	0	0	0	#DIV/0!	#DIV/0!	#DIV/0!	Core
0	0	0	0	0	0	0	0	0	0	0	0	0	0	#DIV/0!	#DIV/0!	#DIV/0!	Core
0	0	0	0	0	0	0	0	0	0	0	0	0	0	#DIV/0!	#DIV/0!	#DIV/0!	Core
0	0	0	0	0	0	0	0	0	0	0	0	0	0	#DIV/0!	#DIV/0!	#DIV/0!	Core
0	0	0	0	0	0	0	0	0	0	0	0	0	0	#DIV/0!	#DIV/0!	#DIV/0!	Core
0	0	0	0	0	0	0	0	0	0	0	0	0	0	#DIV/0!	#DIV/0!	#DIV/0!	Core
0	0	0	0	0	0	0	0	0	0	0	0	0	0	#DIV/0!	#DIV/0!	#DIV/0!	Core
0	0	0	0	0	0	0	0	0	0	0	0	0	0	#DIV/0!	#DIV/0!	#DIV/0!	Core
0	0	0	0	0	0	0	0	0	0	0	0	0	0	#DIV/0!	#DIV/0!	#DIV/0!	Core
0	0	0	0	0	0	0	0	0	0	0	0	0	0	#DIV/0!	#DIV/0!	#DIV/0!	Core
0	0	0	0	0	0	0	0	0	0	0	0	0	0	#DIV/0!	#DIV/0!	#DIV/0!	Core
0	0	0	0	0	0	0	0	0	0	0	0	0	0	#DIV/0!	#DIV/0!	#DIV/0!	Core
0	0	0	0	0	0	0	0	0	0	0	0	0	0	#DIV/0!	#DIV/0!	#DIV/0!	Core
0	0	0	0	0	0	0	0	0	0	0	0	0	0	#DIV/0!	#DIV/0!	#DIV/0!	Core
0	0	0	0	0	0	0	0	0	0	0	0	0	0	#DIV/0!	#DIV/0!	#DIV/0!	Core
0	0	0	0	0	0	0	0	0	0	0	0	0	0	#DIV/0!	#DIV/0!	#DIV/0!	Core
0	0	0	0	0	0	0	0	0	0	0	0	0	0	#DIV/0!	#DIV/0!	#DIV/0!	Core
0	0	0	0	0	0	0	0	0	0	0	0	0	0	#DIV/0!	#DIV/0!	#DIV/0!	Core
0	0	0	0	0	0	0	0	0	0	0	0	0	0	#DIV/0!	#DIV/0!	#DIV/0!	Core
0	0	0	0	0	0	0	0	0	0	0	0	0	0	#DIV/0!	#DIV/0!	#DIV/0!	Core
0	0	0	0	0	0	0	0	0	0	0	0	0	0	#DIV/0!	#DIV/0!	#DIV/0!	Core
0	0	0	0	0	0	0	0	0	0	0	0	0	0	#DIV/0!	#DIV/0!	#DIV/0!	Core
0	0	0	0	0	0	0	0	0	0	0	0	0	0	#DIV/0!	#DIV/0!	#DIV/0!	Core
0	0	0	0	0	0	0	0	0	0	0	0	0	0	#DIV/0!	#DIV/0!	#DIV/0!	Core
0	0	0	0	0	0	0	0	0	0	0	0	0	0	#DIV/0!	#DIV/0!	#DIV/0!	Core
0	0	0	0	0	0	0	0	0	0	0	0	0	0	#DIV/0!	#DIV/0!	#DIV/0!	Core
0	0	0	0	0	0	0	0	0	0	0	0	0	0	#DIV/0!	#DIV/0!	#DIV/0!	Core
0	0	0	0	0	0	0	0	0	0	0	0	0	0	#DIV/0!	#DIV/0!	#DIV/0!	Core
0	0	0	0	0	0	0	0	0	0	0	0	0	0	#DIV/0!	#DIV/0!	#DIV/0!	Core
0	0	0	0	0	0	0	0	0	0	0	0	0	0	#DIV/0!	#DIV/0!	#DIV/0!	Core
0	0	0	0	0	0	0	0	0	0	0	0	0	0	#DIV/0!	#DIV/0!	#DIV/0!	Core
0	0	0	0	0	0	0	0	0	0	0	0	0	0	#DIV/0!	#DIV/0!	#DIV/0!	Core
0	0	0	0	0	0	0	0	0	0	0	0	0	0	#DIV/0!	#DIV/0!	#DIV/0!	Core
0	0	0	0	0	0	0	0	0	0	0	0	0	0	#DIV/0!	#DIV/0!	#DIV/0!	Core
0	0	0	0	0	0	0	0	0	0	0	0	0	0	#DIV/0!	#DIV/0!	#DIV/0!	Core
0	0	0	0	0	0	0	0	0	0	0	0	0	0	#DIV/0!	#DIV/0!	#DIV/0!	Core
0	0	0	0	0	0	0	0	0	0	0	0	0	0	#DIV/0!	#DIV/0!	#DIV/0!	Core
0	0	0	0	0	0	0	0	0	0	0	0	0	0	#DIV/0!	#DIV/0!	#DIV/0!	Core
0	0	0	0	0	0	0	0	0	0	0	0	0	0	#DIV/0!	#DIV/0!	#DIV/0!	Core
0	0	0	0	0	0	0	0	0	0	0	0	0	0	#DIV/0!	#DIV/0!	#DIV/0!	Core
0	0	0	0	0	0	0	0	0	0	0	0	0	0	#DIV/0!	#DIV/0!	#DIV/0!	Core
0	0	0	0	0	0	0	0	0	0	0	0	0	0	#DIV/0!	#DIV/0!	#DIV/0!	Core
0	0	0	0	0	0	0	0	0	0	0	0	0	0	#DIV/0!	#DIV/0!	#DIV/0!	Core
0	0	0	0	0	0	0	0	0	0	0	0	0	0	#DIV/0!	#DIV/0!	#DIV/0!	Core
0	0	0	0	0	0	0	0	0	0	0	0	0	0	#DIV/0!	#DIV/0!	#DIV/0!	Core
0	0	0	0	0	0	0	0	0	0	0	0	0	0	#DIV/0!	#DIV/0!	#DIV/0!	Core
0	0	0	0	0	0	0	0	0	0	0	0	0	0	#DIV/0!	#DIV/0!	#DIV/0!	Core
0	0	0	0	0	0	0	0	0	0	0	0	0	0	#DIV/0!	#DIV/0!	#DIV/0!	Core
0	0	0	0	0	0	0	0	0	0	0	0	0	0	#DIV/0!	#DIV/0!	#DIV/0!	Core
0	0	0	0	0	0	0	0	0	0	0	0	0	0	#DIV/0!	#DIV/0!	#DIV/0!	Core
0	0	0	0	0	0	0	0	0	0	0	0	0	0	#DIV/0!	#DIV/0!	#DIV/0!	Core
0	0	0	0	0	0	0	0	0	0	0	0	0	0	#DIV/0!	#DIV/0!	#DIV/0!	Core
0	0	0	0	0	0	0	0	0	0	0	0	0	0	#DIV/0!	#DIV/0!	#DIV/0!	Core
0	0	0	0	0	0	0	0	0	0	0	0	0	0	#DIV/0!	#DIV/0!	#DIV/0!	Core
0	0	0	0	0	0	0	0	0	0	0	0	0	0	#DIV/0!	#DIV/0!	#DIV/0!	Core
0	0	0	0	0	0	0	0	0	0	0	0	0	0	#DIV/0!	#DIV/0!	#DIV/0!	Core
0	0	0	0	0	0	0	0	0	0	0	0	0	0	#DIV/0!	#DIV/0!	#DIV/0!	Core
0	0	0	0	0	0	0	0	0	0	0	0	0	0	#DIV/0!	#DIV/0!	#DIV/0!	Core
0	0	0	0	0	0	0	0	0	0	0	0	0	0	#DIV/0!	#DIV/0!	#DIV/0!	Core
0	0	0	0	0	0	0	0	0	0	0	0	0	0	#DIV/0!	#DIV/0!	#DIV/0!	Core
0	0	0	0	0	0	0	0	0	0	0	0	0	0	#DIV/0!	#DIV/0!	#DIV/0!	Core
0	0	0	0	0	0	0	0	0	0	0	0	0	0	#DIV/0!	#DIV/0!	#DIV/0!	Core
0	0	0	0	0	0	0	0	0	0	0	0	0	0	#DIV/0!	#DIV/0!	#DIV/0!	Core
0	0	0	0	0	0	0	0	0	0	0	0	0	0	#DIV/0!	#DIV/0!	#DIV/0!	Core
0	0	0	0	0	0	0	0	0	0	0	0	0	0	#DIV/0!	#DIV/0!	#DIV/0!	Core
0	0	0	0	0	0	0	0	0	0	0	0	0	0	#DIV/0!	#DIV/0!	#DIV/0!	Core
0	0	0	0	0	0	0	0	0	0	0	0	0	0	#DIV/0!	#DIV/0!	#DIV/0!	Core
0	0	0	0	0	0	0	0	0	0	0	0	0	0	#DIV/0!	#DIV/0!	#DIV/0!	Core
0	0	0	0	0	0	0	0	0	0	0	0	0	0	#DIV/0!	#DIV/0!	#DIV/0!	Core
0	0	0	0	0	0	0	0	0	0	0	0	0	0	#DIV/0!	#DIV/0!	#DIV/0!	Core
0	0	0	0	0	0	0	0	0	0	0	0	0	0	#DIV/0!	#DIV/0!	#DIV/0!	Core
0	0	0	0	0	0	0	0	0	0	0	0	0	0	#DIV/0!	#DIV/0!	#DIV/0!	Core
0	0	0	0	0	0	0	0	0	0	0	0	0	0	#DIV/0!	#DIV/0!	#DIV/0!	Core
0	0	0	0	0	0	0	0	0	0	0	0	0	0	#DIV/0!	#DIV/0!	#DIV/0!	Core
0	0	0	0	0	0	0	0	0	0	0	0	0	0	#DIV/0!	#DIV/0!	#DIV/0!	Core
0	0	0	0	0	0	0	0	0	0	0	0	0	0	#DIV/0!	#DIV/0!	#DIV/0!	Core
0	0	0	0	0	0	0	0	0	0	0	0	0	0	#DIV/0!	#DIV/0!	#DIV/0!	Core
0	0	0	0	0	0	0	0	0	0	0	0	0	0	#DIV/0!	#DIV/0!	#DIV/0!	Core
0	0	0	0	0	0	0	0	0	0	0	0	0	0	#DIV/0!	#DIV/0!	#DIV/0!	Core
0	0	0	0	0	0	0	0	0	0	0	0	0	0	#DIV/0!	#DIV/0!	#DIV/0!	Core
0	0	0	0	0	0	0	0	0	0	0	0	0	0	#DIV/0!	#DIV/0!	#DIV/0!	Core
0	0	0	0	0	0	0	0	0	0	0	0	0	0	#DIV/0!	#DIV/0!	#DIV/0!	Core
0	0	0	0	0	0	0	0	0	0	0	0	0	0	#DIV/0!	#DIV/0!	#DIV/0!	Core
0	0	0	0	0	0	0	0	0	0	0	0	0	0	#DIV/0!	#DIV/0!	#DIV/0!	Core
0	0	0	0	0	0	0	0	0	0	0	0	0	0	#DIV/0!	#DIV/0!	#DIV/0!	Core
0	0	0	0	0	0	0	0	0	0	0	0	0	0	#DIV/0!	#DIV/0!	#DIV/0!	Core
0	0	0	0	0	0	0	0	0	0	0	0	0	0	#DIV/0!	#DIV/0!	#DIV/0!	Core
0	0	0	0	0	0	0	0	0	0	0	0	0	0	#DIV/0!	#DIV/0!	#DIV/0!	Core
0	0	0	0	0	0	0	0	0	0	0	0	0	0	#DIV/0!	#DIV/0!	#DIV/0!	Core
0	0	0	0	0	0	0	0	0	0	0	0	0	0	#DIV/0!	#DIV/0!	#DIV/0!	Core
0	0	0	0	0	0	0	0	0	0	0	0	0	0	#DIV/0!	#DIV/0!	#DIV/0!	Core
0	0	0	0	0	0	0	0	0	0	0	0	0	0	#DIV/0!	#DIV/0!	#DIV/0!	Core
0	0	0	0	0	0	0	0	0	0	0	0	0	0	#DIV/0!	#DIV/0!	#DIV/0!	Core
0	0	0	0	0	0	0	0	0	0	0	0	0	0	#DIV/0!	#DIV/0!	#DIV/0!	Core
0	0	0	0	0	0	0	0	0	0	0	0	0	0	#DIV/0!	#DIV/0!	#DIV/0!	Core
0	0	0	0	0	0	0	0	0	0	0	0	0	0	#DIV/0!	#DIV/0!	#DIV/0!	Core
0	0	0	0	0	0	0	0	0	0	0	0	0	0	#DIV/0!	#DIV/0!	#DIV/0!	Core
0	0	0	0	0	0	0	0	0	0	0	0	0	0	#DIV/0!	#DIV/0!	#DIV/0!	Core
0	0	0	0	0	0	0	0	0	0	0	0	0	0	#DIV/0!	#DIV/0!	#DIV/0!	Core
0	0	0	0	0	0	0	0	0	0	0	0	0	0	#DIV/0!	#DIV/0!	#DIV/0!	Core
0	0	0	0	0	0	0	0	0	0	0	0	0	0	#DIV/0!	#DIV/0!	#DIV/0!	Core
0	0	0	0	0	0	0	0	0	0	0	0	0	0	#DIV/0!	#DIV/0!	#DIV/0!	Core
0	0	0	0	0	0	0	0	0	0	0	0	0	0	#DIV/0!	#DIV/0!	#DIV/0!	Core
0	0	0	0	0	0	0	0	0	0	0	0	0	0	#DIV/0!	#DIV/0!	#DIV/0!	Core
0	0	0	0	0	0	0	0	0	0	0	0	0	0	#DIV/0!	#DIV/0!	#DIV/0!	Core
0	0	0	0	0	0	0	0	0	0	0	0	0	0	#DIV/0!	#DIV/0!	#DIV/0!	Core
0	0	0	0	0	0	0	0	0	0	0	0	0	0	#DIV/0!	#DIV/0!	#DIV/0!	Core
0	0	0	0	0	0	0	0	0	0	0	0	0	0	#DIV/0!	#DIV/0!	#DIV/0!	Core
0	0	0	0	0	0	0	0	0	0	0	0	0	0	#DIV/0!	#DIV/0!	#DIV/0!	Core
0	0	0	0	0	0	0	0	0	0	0	0	0	0	#DIV/0!	#DIV/0!	#DIV/0!	Core
0	0	0	0	0	0	0	0	0	0	0	0	0	0	#DIV/0!	#DIV/0!	#DIV/0!	Core
0	0	0	0	0	0	0	0	0	0	0	0	0	0	#DIV/0!	#DIV/0!	#DIV/0!	Core
0	0	0	0	0	0	0	0	0	0	0	0	0	0	#DIV/0!	#DIV/0!	#DIV/0!	Core
0	0	0	0	0	0	0	0	0	0	0	0	0	0	#DIV/0!	#DIV/0!	#DIV/0!	Core
0	0	0	0	0	0	0	0	0	0	0	0	0	0	#DIV/0!	#DIV/0!	#DIV/0!	Core
0	0	0	0	0	0	0	0	0	0	0	0	0	0	#DIV/0!	#DIV/0!	#DIV/0!	Core
0	0	0	0	0	0	0	0	0	0	0	0	0	0	#DIV/0!	#DIV/0!	#DIV/0!	Core
0	0	0	0	0	0	0	0	0	0	0	0	0	0	#DIV/0!	#DIV/0!	#DIV/0!	Core
0	0	0	0	0	0	0	0	0	0	0	0	0	0	#DIV/0!	#DIV/0!	#DIV/0!	Core
0	0	0	0	0	0	0	0	0	0	0	0	0	0	#DIV/0!	#DIV/0!	#DIV/0!	Core
0	0	0	0	0	0	0	0	0	0	0	0	0	0	#DIV/0!	#DIV/0!	#DIV/0!	Core
0	0	0	0	0	0	0	0	0	0	0	0	0	0	#DIV/0!	#DIV/0!	#DIV/0!	Core
0	0	0	0	0	0	0	0	0	0	0	0	0	0	#DIV/0!	#DIV/0!	#DIV/0!	Core
0	0	0	0	0	0	0	0	0	0	0	0	0	0	#DIV/0!	#DIV/0!	#DIV/0!	Core
0	0	0	0	0	0	0	0	0	0	0	0	0	0	#DIV/0!	#DIV/0!	#DIV/0!	Core
0	0	0	0	0	0	0	0	0	0	0	0	0	0	#DIV/0!	#DIV/0!	#DIV/0!	Core
0	0	0	0	0	0	0	0	0	0	0	0	0	0	#DIV/0!	#DIV/0!	#DIV/0!	Core
0	0	0	0	0	0	0	0	0	0	0	0	0	0	#DIV/0!	#DIV/0!	#DIV/0!	Core
0	0	0	0	0	0	0	0	0	0	0	0	0	0	#DIV/0!	#DIV/0!	#DIV/0!	Core
0	0	0	0	0	0	0	0	0	0	0	0	0	0	#DIV/0!	#DIV/0!	#DIV/0!	Core
0	0	0	0	0	0	0	0	0	0	0	0	0	0	#DIV/0!	#DIV/0!	#DIV/0!	Core
0	0	0	0	0	0	0	0	0	0	0	0	0	0	#DIV/0!	#DIV/0!	#DIV/0!	Core
0	0	0	0	0	0	0	0	0	0	0	0	0	0	#DIV/0!	#DIV/0!	#DIV/0!	Core
0	0	0	0	0	0	0	0	0	0	0	0	0	0	#DIV/0!	#DIV/0!	#DIV/0!	Core
0	0	0	0	0	0	0	0	0	0	0	0	0	0	#DIV/0!	#DIV/0!	#DIV/0!	Core
0	0	0	0	0	0	0	0	0	0	0	0	0	0	#DIV/0!	#DIV/0!	#DIV/0!	Core
0	0	0	0	0	0	0	0	0	0	0	0	0	0	#DIV/0!	#DIV/0!	#DIV/0!	Core
0	0	0	0	0	0	0	0	0	0	0	0	0	0	#DIV/0!	#DIV/0!	#DIV/0!	Core
0	0	0	0	0	0	0	0	0	0	0	0	0	0	#DIV/0!	#DIV/0!	#DIV/0!	Core
0	0	0	0	0	0	0	0	0	0	0	0	0	0	#DIV/0!	#DIV/0!	#DIV/0!	Core
0	0	0	0	0	0	0	0	0	0	0	0	0	0	#DIV/0!	#DIV/0!	#DIV/0!	Core
0	0	0	0	0	0	0	0	0	0	0	0	0	0	#DIV/0!	#DIV/0!	#DIV/0!	Core
0	0	0	0	0	0	0	0	0	0	0	0	0	0	#DIV/0!	#DIV/0!	#DIV/0!	Core
0	0	0	0	0	0	0	0	0	0	0	0	0	0	#DIV/0!	#DIV/0!	#DIV/0!	Core
0	0	0	0	0	0	0	0	0	0	0	0	0	0	#DIV/0!	#DIV/0!	#DIV/0!	Core
0	0	0	0	0	0	0	0	0	0	0	0	0	0	#DIV/0!	#DIV/0!	#DIV/0!	Core
0	0	0	0	0	0	0	0	0	0	0	0	0	0	#DIV/0!	#DIV/0!	#DIV/0!	Core
0	0	0	0	0	0	0	0	0	0	0	0	0	0	#DIV/0!	#DIV/0!	#DIV/0!	Core
0	0	0	0	0	0	0	0	0	0	0	0	0	0	#DIV/0!	#DIV/0!	#DIV/0!	Core
0	0	0	0	0	0	0	0	0	0	0	0	0	0	#DIV/0!	#DIV/0!	#DIV/0!	Core
0	0	0	0	0	0	0	0	0	0	0	0	0	0	#DIV/0!	#DIV/0!	#DIV/0!	Core
0	0	0	0	0	0	0	0	0	0	0	0	0	0	#DIV/0!	#DIV/0!	#DIV/0!	Core
0	0	0	0	0	0	0	0	0	0	0	0	0	0	#DIV/0!	#DIV/0!	#DIV/0!	Core
0	0	0	0	0	0	0	0	0	0	0	0	0	0	#DIV/0!	#DIV/0!	#DIV/0!	Core
0	0	0	0	0	0	0	0	0	0	0	0	0	0	#DIV/0!	#DIV/0!	#DIV/0!	Core
0	0	0	0	0	0	0	0	0	0	0	0	0	0	#DIV/0!	#DIV/0!	#DIV/0!	Core
0	0	0	0	0	0	0	0	0	0	0	0	0	0	#DIV/0!	#DIV/0!	#DIV/0!	Core
0	0	0	0	0	0	0	0	0	0	0	0	0	0	#DIV/0!	#DIV/0!	#DIV/0!	Core
0	0	0	0	0	0	0	0	0	0	0	0	0	0	#DIV/0!	#DIV/0!	#DIV/0!	Core
0	0	0	0	0	0	0	0	0	0	0	0	0	0	#DIV/0!	#DIV/0!	#DIV/0!	Core
0	0	0	0	0	0	0	0	0	0	0	0	0	0	#DIV/0!	#DIV/0!	#DIV/0!	Core
0	0	0	0	0	0	0	0	0	0	0	0	0	0	#DIV/0!	#DIV/0!	#DIV/0!	Core
0	0	0	0	0	0	0	0	0	0	0	0	0	0	#DIV/0!	#DIV/0!	#DIV/0!	Core
0	0	0	0	0	0	0	0	0	0	0	0	0	0	#DIV/0!	#DIV/0!	#DIV/0!	Core

## Sheet: S8. U-Pb Hart1
Sample Name: Hartselle Ss		561266	3764350					207/235		206/238		207/206		Best age
Grain #	[U] ppm	U/Th	207/235	2σ error	206/238	2σ error	RHO	Age Ma	2σ error	Age (Ma)	2σ error	Age (Ma)	2σ error	(Ma)	2σ error	% Discordance*	Th/U
Hart1.123	44.3		1.23	0.34	0.0824	0.0043	0	633	89	509	25	870	270	509	25	19.5893
Hart1.57	37.7		2.12	0.15	0.188	0.012	0	1129	53	1113	65	1190	140	1113	65	1.41718
Hart1.14	277.6	381	1.621	0.031	0.1619	0.0019	0	976	12	967	10	1005	38	967	10	0.922131	0.00262467
Hart1.12	267	121.3	5.42	0.16	0.345	0.012	0	1893	24	1914	59	1850	39	1850	39	3.45946	0.00824402
Hart1.41	701	36.4	1.489	0.036	0.1629	0.0042	0	922	14	971	23	834	41	971	23	5.31453	0.0274725
Hart1.72	1083	32.4	0.462	0.014	0.0648	0.0018	0	384.1	9.7	404	11	252	51	404	11	5.18094	0.0308642
Hart1.56	533	19.2	1.789	0.045	0.18	0.0039	0	1037	17	1066	21	975	38	1066	21	2.79653	0.0520833
Hart1.64	641	17.3	2.026	0.087	0.1883	0.0068	0	1111	28	1108	37	1117	46	1108	37	0.270027	0.0578035
Hart1.08	124.6	17.08	3.578	0.095	0.2723	0.0046	0	1540	20	1554	24	1510	58	1510	58	2.91391	0.058548
Hart1.52	260	13.9	1.824	0.082	0.1768	0.0081	0	1043	30	1044	44	1056	58	1044	44	0.0958773	0.0719424
Hart1.39	417	12.24	3.539	0.078	0.2783	0.0063	0	1533	17	1580	32	1479	37	1479	37	6.82894	0.0816993
Hart1.74	560	11.4	3.72	0.24	0.288	0.02	0	1554	52	1619	98	1491	82	1491	82	8.58484	0.0877193
Hart1.107	367	10.5	1.559	0.048	0.1648	0.0035	0	948	19	982	19	890	60	982	19	3.5865	0.0952381
Hart1.92	157.7	10.3	5.98	0.16	0.3669	0.009	0	1970	23	2029	41	1906	39	1906	39	6.45331	0.0970874
Hart1.79	198	9.2	1.85	0.11	0.1883	0.006	0	1039	39	1114	33	880	120	1114	33	7.21848	0.108696
Hart1.21	669	8.78	2.043	0.049	0.1917	0.0054	0	1129	17	1129	29	1134	36	1129	29	0	0.113895
Hart1.67	594	8.22	2.088	0.039	0.1999	0.0028	0	1144	13	1174	15	1083	27	1174	15	2.62238	0.121655
Hart1.104	880	7.89	2.825	0.093	0.2338	0.0075	0	1351	25	1350	39	1380	28	1380	28	2.17391	0.126743
Hart1.122	213	7.3	2.37	0.12	0.219	0.0062	0	1213	34	1282	33	1096	86	1096	33	5.68838	0.136986
Hart1.68	1590	6.65	1.17	0.042	0.1155	0.0045	0	780	20	703	26	1039	38	703	26	9.87179	0.150376
Hart1.85	417	6.51	1.645	0.079	0.1792	0.0093	0	972	31	1056	50	820	67	1056	50	8.64198	0.15361
Hart1.51	458	6.41	1.562	0.058	0.1604	0.0062	0	956	22	956	34	938	55	956	34	0	0.156006
Hart1.66	316	5.94	0.474	0.023	0.0645	0.0028	0	390	16	402	17	325	78	402	17	3.07692	0.16835
Hart1.94	261	5.9	1.638	0.09	0.185	0.011	0	964	36	1082	61	761	81	1082	61	12.2407	0.169492
Hart1.55	60.3	5.7	1.92	0.21	0.163	0.015	0	989	86	953	85	1040	200	953	85	3.64004	0.175439
Hart1.22	132	5.55	1.481	0.093	0.1576	0.0051	0	904	39	941	29	850	130	941	29	4.09292	0.18018
Hart1.54	127	5.47	1.808	0.064	0.1749	0.0036	0	1043	23	1038	20	1053	61	1038	20	0.479386	0.182815
Hart1.77	315	5.34	1.504	0.056	0.16	0.0033	0	926	25	956	18	825	77	956	18	3.23974	0.187266
Hart1.124	359	5.22	1.674	0.044	0.1658	0.0028	0	994	17	988	15	1014	58	988	15	0.603622	0.191571
Hart1.114	504	5.09	11.55	0.19	0.4852	0.0067	0	2570	15	2549	29	2624	28	2624	28	2.85823	0.196464
Hart1.77	534	4.91	0.461	0.014	0.0658	0.0013	0	386	10	410.6	7.6	215	59	410.6	7.6	6.37306	0.203666
Hart1.59	669	4.89	1.313	0.052	0.1327	0.0047	0	848	23	801	27	1058	56	801	27	5.54245	0.204499
Hart1.50	700	4.87	2.101	0.089	0.1986	0.0089	0	1134	31	1162	48	1107	59	1162	48	2.46914	0.205339
Hart1.02	44.2	4.78	1.6	0.1	0.1682	0.0049	0	945	41	1000	27	760	150	1000	27	5.82011	0.209205
Hart1.59	297	4.62	1.523	0.042	0.1587	0.0029	0	938	17	949	16	903	60	949	16	1.17271	0.21645
Hart1.43	420	4.56	0.498	0.028	0.0676	0.0021	0	411	18	421	12	380	110	421	12	2.43309	0.219298
Hart1.87	226	4.44	2.177	0.096	0.2155	0.0073	0	1158	31	1254	39	997	53	997	39	8.29016	0.225225
Hart1.81	266	4.38	1.589	0.043	0.1751	0.0035	0	961	17	1041	20	777	56	1041	20	8.32466	0.228311
Hart1.96	818	4.263	1.873	0.038	0.163	0.0024	0	1069	14	973	13	1288	39	973	13	8.98036	0.234577
Hart1.09	182	4.13	1.554	0.06	0.1665	0.0047	0	949	26	991	26	868	80	991	26	4.42571	0.242131
Hart1.95	1170	4.06	0.405	0.025	0.0579	0.004	0	340	18	361	24	258	80	361	24	6.17647	0.246305
Hart1.46	247	4	1.824	0.059	0.179	0.0051	0	1049	22	1060	28	1029	48	1060	28	1.04862	0.25
Hart1.28	102.9	3.92	1.561	0.07	0.1649	0.0039	0	942	27	983	21	814	93	983	21	4.35244	0.255102
Hart1.59	121	3.88	0.633	0.06	0.0777	0.0048	0	495	37	482	29	500	190	482	29	2.62626	0.257732
Hart1.108	392	3.851	1.563	0.036	0.1678	0.0024	0	952	15	999	13	843	58	999	13	4.93697	0.259673
Hart1.112	31	3.85	2.23	0.15	0.1903	0.0076	0	1166	46	1119	41	1180	130	1119	41	4.03087	0.25974
Hart1.119	345	3.82	1.598	0.044	0.1673	0.0035	0	964	18	996	19	900	55	996	19	3.3195	0.26178
Hart1.66	131	3.79	1.662	0.087	0.1728	0.0043	0	978	30	1026	24	861	96	1026	24	4.90798	0.263852
Hart1.44	161.2	3.78	1.612	0.064	0.1654	0.0062	0	965	25	984	34	916	59	984	34	1.96891	0.26455
Hart1.75	132	3.74	12.03	0.4	0.515	0.019	0	2590	32	2672	81	2538	40	2538	40	5.27975	0.26738
Hart1.30	202	3.67	1.691	0.043	0.1674	0.0022	0	1001	16	998	12	990	45	998	12	0.2997	0.27248
Hart1.07	296	3.54	1.221	0.06	0.1335	0.0058	0	800	29	809	34	808	73	809	34	1.125	0.282486
Hart1.121	130	3.532	2.12	0.15	0.1966	0.0041	0	1122	27	1156	22	1067	91	1156	22	3.0303	0.283126
Hart1.6	306	3.51	0.625	0.02	0.0763	0.0014	0	491	12	473.9	8.2	552	66	473.9	8.2	3.48269	0.2849
Hart1.89	828	3.44	1.359	0.055	0.1489	0.0053	0	863	23	892	29	781	53	892	29	3.36037	0.290698
Hart1.82	514	3.44	2.19	0.13	0.198	0.011	0	1137	52	1156	62	1152	50	1156	62	1.67106	0.290698
Hart1.2	290	3.43	2.256	0.047	0.1979	0.0032	0	1196	15	1163	17	1255	39	1163	17	2.7592	0.291545
Hart1.78	550	3.43	4.82	0.12	0.3334	0.0077	0	1784	20	1851	38	1705	39	1705	39	8.56305	0.291545
Hart1.115	176	3.34	9.91	0.3	0.4498	0.009	0	2415	33	2398	38	2472	35	2472	35	2.99353	0.299401
Hart1.53	386.7	3.221	2.144	0.034	0.1923	0.0027	0	1161	11	1133	14	1214	28	1133	14	2.41171	0.310463
Hart1.38	488	3.2	1.927	0.047	0.1867	0.003	0	1088	16	1103	16	1061	45	1103	16	1.37868	0.3125
Hart1.42	52.9	3.195	1.641	0.083	0.1658	0.0058	0	975	32	987	32	956	92	987	32	1.23077	0.312989
Hart1.64	167	3.15	1.711	0.079	0.1775	0.0051	0	1002	30	1051	28	907	91	1051	28	4.89022	0.31746
Hart1.43	254	3.144	2.144	0.073	0.1991	0.0065	0	1154	24	1167	35	1131	46	1167	35	1.12652	0.318066
Hart1.32	1350	3.138	1.206	0.056	0.1078	0.0042	0	796	25	658	24	1224	43	658	24	17.3367	0.318674
Hart1.83	305	3.03	1.76	0.11	0.176	0.011	0	1005	46	1034	61	1067	70	1034	61	2.88557	0.330033
Hart1.58	157	3.028	2.541	0.082	0.2191	0.006	0	1278	23	1274	31	1257	42	1257	42	1.35243	0.330251
Hart1.93	297	2.987	1.528	0.047	0.1644	0.0028	0	938	19	980	15	832	57	980	15	4.47761	0.334784
Hart1.25	423	2.97	0.437	0.023	0.0616	0.0019	0	360	14	385	12	256	93	385	12	6.94444	0.3367
Hart1.78	97.1	2.941	3.002	0.07	0.2485	0.004	0	1403	18	1430	21	1368	48	1368	48	4.53216	0.34002
Hart1.53	110.1	2.934	1.581	0.074	0.1739	0.0056	0	948	30	1031	31	770	100	1031	31	8.75527	0.340832
Hart1.19	47.6	2.93	1.69	0.14	0.1618	0.005	0	964	49	965	27	920	160	965	27	0.103734	0.341297
Hart1.31	179.3	2.925	1.766	0.074	0.1724	0.0075	0	1020	28	1021	41	1009	71	1021	41	0.0980392	0.34188
Hart1.16	99.6	2.917	1.557	0.047	0.1567	0.0029	0	949	19	938	16	988	61	938	16	1.15911	0.342818
Hart1.06	178	2.916	1.457	0.058	0.1566	0.004	0	903	24	936	22	802	91	936	22	3.65449	0.342936
Hart1.47	347	2.9	3.12	0.12	0.248	0.01	0	1423	30	1420	54	1449	49	1449	49	2.00138	0.344828
Hart1.15	590	2.894	3.69	0.12	0.2729	0.0096	0	1561	27	1549	49	1598	36	1598	36	3.06633	0.345543
Hart1.86	359	2.889	3.118	0.066	0.2544	0.0039	0	1433	16	1460	20	1390	38	1390	38	5.03597	0.346141
Hart1.91	420	2.81	1.422	0.067	0.1534	0.006	0	891	32	917	34	874	68	917	34	2.91807	0.355872
Hart1.69	123	2.79	1.662	0.087	0.1698	0.0054	0	980	33	1009	30	900	110	1009	30	2.95918	0.358423
Hart1.82	362	2.788	2.519	0.078	0.233	0.0067	0	1272	23	1347	35	1137	46	1137	35	5.89623	0.35868
Hart1.41	84	2.786	1.57	0.056	0.1582	0.0038	0	950	22	946	21	919	74	946	21	0.421053	0.358938
Hart1.11	411	2.77	1.648	0.05	0.1612	0.0047	0	984	20	962	26	1024	50	962	26	2.23577	0.361011
Hart1.62	123.7	2.76	1.666	0.077	0.1637	0.0069	0	981	30	974	38	977	77	974	38	0.713558	0.362319
Hart1.17	281	2.756	2.778	0.089	0.24	0.0061	0	1346	24	1384	32	1270	46	1270	46	8.97638	0.362845
Hart1.48	127	2.712	1.334	0.093	0.1445	0.0073	0	844	41	866	42	850	120	866	42	2.60664	0.368732
Hart1.60	630	2.71	2.3	0.16	0.211	0.012	0	1172	56	1220	66	1107	69	1107	66	4.09556	0.369004
Hart1.24	990	2.7	3.152	0.061	0.2503	0.0047	0	1446	14	1444	23	1464	22	1464	22	1.36612	0.37037
Hart1.111	238	2.69	1.502	0.069	0.1633	0.0044	0	917	29	982	22	845	71	982	22	7.08833	0.371747
Hart1.04	246	2.69	1.696	0.064	0.1759	0.0037	0	1005	24	1043	20	916	78	1043	20	3.78109	0.371747
Hart1.23	459	2.673	1.888	0.049	0.1819	0.0041	0	1073	17	1077	22	1067	37	1077	22	0.372787	0.374111
Hart1.75	291	2.613	1.785	0.066	0.1812	0.0041	0	1029	25	1072	23	981	63	1072	23	4.17881	0.382702
Hart1.71	604	2.61	1.669	0.047	0.1684	0.0052	0	994	17	1001	29	972	62	1001	29	0.704225	0.383142
Hart1.47	271	2.57	1.558	0.054	0.1654	0.0044	0	945	22	985	24	863	71	985	24	4.2328	0.389105
Hart1.1	194.2	2.542	2.966	0.056	0.2326	0.0034	0	1396	14	1347	18	1478	33	1478	33	8.86333	0.393391
Hart1.36	377	2.514	1.94	0.068	0.1832	0.0048	0	1095	23	1090	25	1116	52	1090	25	0.456621	0.397772
Hart1.4	213	2.51	2.157	0.042	0.1996	0.0027	0	1165	13	1173	14	1156	39	1173	14	0.686695	0.398406
Hart1.40	32.2	2.501	2.72	0.16	0.2304	0.0072	0	1307	43	1333	38	1250	120	1250	120	6.64	0.39984
Hart1.69	80.7	2.44	1.713	0.057	0.1709	0.0033	0	1009	21	1016	18	964	73	1016	18	0.693756	0.409836
Hart1.44	347	2.438	1.95	0.049	0.1897	0.0035	0	1093	17	1119	19	1052	44	1119	19	2.37877	0.410172
Hart1.55	470	2.426	1.98	0.11	0.203	0.012	0	1086	38	1181	63	942	74	1181	63	8.7477	0.412201
Hart1.37	65.5	2.382	1.843	0.088	0.1841	0.0049	0	1045	31	1087	26	940	110	1087	26	4.01914	0.419815
Hart1.88	814	2.37	7.84	0.49	0.361	0.024	0	2156	60	1960	110	2429	46	2429	46	19.3084	0.421941
Hart1.105	153.5	2.363	1.97	0.054	0.1961	0.0035	0	1103	19	1153	19	1013	62	1153	19	4.53309	0.423191
Hart1.26	283	2.353	1.414	0.052	0.1558	0.0042	0	887	22	932	24	801	70	932	24	5.07328	0.424989
Hart1.49	742	2.31	0.427	0.016	0.0596	0.0013	0	359	11	373.2	8	300	75	373.2	8	3.95543	0.4329
Hart1.61	131.8	2.3	2.69	0.18	0.233	0.015	0	1314	49	1344	80	1280	100	1280	100	5	0.434783
Hart1.99	98	2.236	1.606	0.08	0.1688	0.0034	0	969	31	1005	19	890	110	1005	19	3.71517	0.447227
Hart1.96	123.4	2.2	1.678	0.065	0.1769	0.0051	0	994	25	1048	28	912	87	1048	28	5.4326	0.454545
Hart1.81	195	2.151	4.13	0.12	0.302	0.0083	0	1656	26	1702	43	1602	47	1602	47	6.2422	0.4649
Hart1.94	66.2	2.147	2.988	0.089	0.2542	0.0055	0	1405	25	1458	28	1314	72	1314	72	10.9589	0.465766
Hart1.23	171	2.12	1.648	0.076	0.1699	0.0043	0	979	29	1010	24	909	98	1010	24	3.1665	0.471698
Hart1.84	176	2.096	1.773	0.053	0.1834	0.0041	0	1031	20	1084	22	916	57	1084	22	5.14064	0.477099
Hart1.8	393	2.08	1.552	0.031	0.1579	0.0023	0	949	12	945	13	973	37	945	13	0.421496	0.480769
Hart1.73	115	2.073	1.951	0.073	0.1959	0.0061	0	1088	25	1150	33	962	63	1150	33	5.69853	0.482393
Hart1.103	238	2.036	1.52	0.052	0.1674	0.0038	0	934	21	997	21	818	66	997	21	6.74518	0.491159
Hart1.102	125.7	2.033	1.594	0.059	0.1689	0.003	0	962	24	1008	16	851	79	1008	16	4.7817	0.491884
Hart1.01	343	2.032	2.67	0.052	0.2277	0.003	0	1320	15	1322	16	1316	41	1316	41	0.455927	0.492126
Hart1.126	128.3	2.03	1.983	0.086	0.2032	0.0038	0	1095	28	1191	21	899	86	1191	21	8.76712	0.492611
Hart1.33	85.5	2.028	1.751	0.059	0.1681	0.0036	0	1020	22	1000	20	1057	65	1000	20	1.96078	0.493097
Hart1.29	376	2.02	2.184	0.062	0.1955	0.0048	0	1172	19	1149	26	1182	54	1149	26	1.96246	0.49505
Hart1.10	590	2.019	2.691	0.095	0.2279	0.0086	0	1325	26	1318	46	1364	36	1364	36	3.37243	0.495295
Hart1.65	245	2.012	1.807	0.065	0.1815	0.0037	0	1039	23	1074	20	957	70	1074	20	3.36862	0.497018
Hart1.109	133.3	1.98	0.513	0.045	0.064	0.0017	0	410	28	400	10	380	150	400	10	2.43902	0.505051
Hart1.80	135	1.979	2.31	0.11	0.2148	0.0096	0	1197	33	1254	52	1137	65	1137	52	4.7619	0.505306
Hart1.03	615	1.964	0.431	0.019	0.0579	0.0025	0	363	14	362	16	410	100	362	16	0.275482	0.509165
Hart1.34	371	1.953	3.62	0.16	0.275	0.012	0	1537	35	1561	59	1530	51	1530	51	2.02614	0.512033
Hart1.28	266	1.93	1.707	0.034	0.1703	0.0024	0	1008	13	1014	13	978	43	1014	13	0.595238	0.518135
Hart1.15b	278	1.93	4.085	0.081	0.2934	0.0042	0	1648	16	1658	21	1639	32	1639	32	1.15924	0.518135
Hart1.3	172.5	1.913	2.958	0.054	0.2319	0.0026	0	1394	14	1344	13	1473	35	1473	35	8.75764	0.522739
Hart1.22	730	1.912	1.595	0.028	0.159	0.0023	0	967	11	953	13	1003	27	953	13	1.44778	0.523013
Hart1.9	151.3	1.903	1.798	0.042	0.1716	0.0022	0	1043	16	1021	12	1082	48	1021	12	2.1093	0.525486
Hart1.67	203	1.89	1.785	0.075	0.185	0.0045	0	1032	27	1093	24	919	80	1093	24	5.91085	0.529101
Hart1.33	209	1.88	1.859	0.075	0.172	0.0047	0	1066	29	1021	26	1113	81	1021	26	4.22139	0.531915
Hart1.49	1085	1.87	1.84	0.12	0.176	0.012	0	1028	44	1034	66	1081	57	1034	66	0.583658	0.534759
Hart1.70	130.2	1.84	1.683	0.056	0.1734	0.0044	0	1000	22	1029	24	895	61	1029	24	2.9	0.543478
Hart1.60	446	1.822	11.26	0.19	0.4792	0.0084	0	2540	16	2520	37	2561	19	2561	19	1.60094	0.548847
Hart1.88	117.2	1.81	1.84	0.12	0.1551	0.0056	0	1067	41	927	31	1310	140	927	31	13.1209	0.552486
Hart1.89	156	1.806	3.9	0.1	0.2848	0.0064	0	1613	22	1612	32	1614	53	1614	53	0.123916	0.55371
Hart1.39	99.7	1.802	4.045	0.079	0.2942	0.0044	0	1640	16	1661	22	1621	39	1621	39	2.46761	0.554939
Hart1.62	94.7	1.787	1.884	0.089	0.1888	0.0049	0	1068	30	1113	27	951	92	1113	27	4.21348	0.559597
Hart1.21	409	1.747	1.571	0.048	0.16	0.0047	0	958	18	955	26	973	54	955	26	0.313152	0.57241
Hart1.13	96	1.708	3.69	0.13	0.2778	0.007	0	1568	29	1577	36	1571	65	1571	65	0.381922	0.58548
Hart1.79	548	1.7	0.423	0.014	0.0627	0.0013	0	357	11	391.8	8	189	64	391.8	8	9.7479	0.588235
Hart1.11	199	1.682	3.749	0.078	0.2903	0.0051	0	1577	17	1641	25	1515	38	1515	38	8.31683	0.59453
Hart1.63	100	1.67	3.65	0.14	0.2824	0.0072	0	1549	29	1600	36	1473	66	1473	66	8.62186	0.598802
Hart1.50	361	1.629	2.98	0.12	0.2536	0.0078	0	1409	30	1453	40	1388	46	1388	46	4.683	0.613874
Hart1.71	84.4	1.586	1.545	0.07	0.1614	0.006	0	935	28	962	33	858	87	962	33	2.8877	0.630517
Hart1.42	266	1.586	1.841	0.053	0.1872	0.0047	0	1054	20	1108	24	997	54	1108	24	5.12334	0.630517
Hart1.101	27.8	1.52	2.33	0.14	0.212	0.0055	0	1189	45	1237	29	1050	140	1050	29	4.03701	0.657895
Hart1.110	56	1.51	1.78	0.14	0.1663	0.0096	0	1000	49	984	54	1110	150	984	54	1.6	0.662252
Hart1.27	159.2	1.506	2.147	0.066	0.1927	0.0044	0	1161	22	1135	24	1194	49	1135	24	2.23945	0.664011
Hart1.73	205	1.493	9.95	0.25	0.469	0.011	0	2428	22	2473	49	2388	34	2388	34	3.55946	0.669792
Hart1.98	49.8	1.49	2.16	0.11	0.2023	0.0048	0	1147	35	1186	26	1050	110	1186	26	3.40017	0.671141
Hart1.38	267	1.467	3.227	0.08	0.2527	0.0066	0	1462	19	1451	34	1479	49	1479	49	1.89317	0.681663
Hart1.5	159	1.436	0.579	0.029	0.0728	0.0014	0	461	19	453.1	8.3	500	110	453.1	8.3	1.71367	0.696379
Hart1.32	111	1.419	2.039	0.084	0.1954	0.0082	0	1126	29	1146	44	1067	73	1146	44	1.7762	0.704722
Hart1.25	54	1.396	1.77	0.1	0.1754	0.0071	0	1016	38	1039	39	940	110	1039	39	2.26378	0.716332
Hart1.15t	191.3	1.396	3.98	0.14	0.284	0.01	0	1620	29	1605	51	1660	48	1660	48	3.31325	0.716332
Hart1.118	215	1.364	1.412	0.044	0.1517	0.0025	0	892	18	910	14	827	66	910	14	2.01794	0.733138
Hart1.83	114.4	1.336	1.58	0.06	0.1654	0.0042	0	955	23	986	23	876	69	986	23	3.24607	0.748503
Hart1.100	93.1	1.333	3.24	0.15	0.2643	0.0059	0	1451	35	1509	30	1375	80	1375	80	9.74545	0.750188
Hart1.26	479	1.326	4.86	0.2	0.31	0.014	0	1790	37	1742	72	1853	46	1853	46	5.99029	0.754148
Hart1.92	227	1.305	1.507	0.044	0.1616	0.0034	0	928	18	965	19	849	63	965	19	3.98707	0.766284
Hart1.45	79.5	1.297	0.492	0.041	0.0672	0.0022	0	400	29	419	13	280	160	419	13	4.75	0.77101
Hart1.127	89.3	1.263	2.231	0.077	0.2017	0.0051	0	1184	25	1182	27	1171	81	1182	27	0.168919	0.791766
Hart1.95	124.8	1.244	3.47	0.1	0.2648	0.0049	0	1512	23	1517	26	1511	56	1511	56	0.397088	0.803859
Hart1.125	184	1.239	1.443	0.051	0.159	0.0028	0	899	21	951	16	805	68	951	16	5.7842	0.807103
Hart1.61	202	1.219	0.673	0.044	0.0905	0.0034	0	517	24	558	20	360	110	558	20	7.93037	0.820345
Hart1.70	276	1.195	11.51	0.28	0.492	0.013	0	2559	24	2569	55	2563	28	2563	28	0.234101	0.83682
Hart1.116	279	1.156	0.543	0.024	0.0725	0.0016	0	436	16	451.1	9.7	363	92	451.1	9.7	3.4633	0.865052
Hart1.18	245.2	1.142	0.454	0.017	0.06	0.0014	0	378	12	375.6	8.6	375	75	375.6	8.6	0.634921	0.875657
Hart1.48	82.7	1.138	3.397	0.091	0.2507	0.0054	0	1501	20	1440	28	1582	47	1582	47	8.97598	0.878735
Hart1.36	64.4	1.116	2.87	0.14	0.2208	0.0091	0	1355	37	1280	48	1460	100	1460	100	12.3288	0.896057
Hart1.19	134	1.112	3.667	0.068	0.2658	0.0035	0	1562	15	1519	18	1624	37	1624	37	6.46552	0.899281
Hart1.17	401	1.087	0.54	0.019	0.06577	0.00097	0	437	12	410.6	5.9	557	67	410.6	5.9	6.04119	0.919963
Hart1.18	85.5	1.016	3.69	0.14	0.2783	0.0069	0	1558	30	1580	35	1525	77	1525	77	3.60656	0.984252
Hart1.52	92.9	1.005	3.26	0.14	0.2538	0.0081	0	1460	33	1453	41	1504	74	1504	74	3.39096	0.995025
Hart1.76	259	0.837	0.481	0.016	0.0689	0.0012	0	396	11	429.5	7.5	205	67	429.5	7.5	8.4596	1.19474
Hart1.117	47.7	0.742	8.04	0.33	0.384	0.012	0	2214	37	2094	60	2327	62	2327	62	10.0129	1.34771
Hart1.20	141.9	0.553	1.498	0.041	0.1543	0.0026	0	926	17	925	14	922	57	925	14	0.107991	1.80832
Hart1.113	125.3	0.519	1.59	0.065	0.1674	0.0031	0	964	29	997	17	858	97	997	17	3.42324	1.92678
Hart1.27	324	0.469	1.82	0.15	0.1446	0.0097	0	1000	53	863	54	1377	58	863	54	13.7	2.1322
Hart1.46	111.9	0.3962	12.53	0.27	0.52	0.012	0	2643	21	2693	49	2619	32	2619	32	2.82551	2.52398
Hart1.31	19.6	0.1127	127.7	5	1.307	0.049	0	4909	38	5340	130	4751	34	4751	34	12.3974
Hart1.20	14.6	0.0936	125.5	4.2	1.241	0.041	0	4896	36	5170	120	4836	35	4836	35	6.90653
Hart1.58	5.27	0.238	122	10	1.22	0.11	0	4822	86	4910	320	4846	84	4846	84	1.32068
Hart1.93	83.4	2.23	4.01	0.27	0.228	0.011	0	1583	59	1315	58	1972	99	DISC	DISC	33.3164
Hart1.05	16.2	0.476	28.6	1.4	0.351	0.016	0	3409	47	1936	74	4477	53	DISC	DISC	56.7568
Hart1.120	55.3	0.562	13.4	0.47	0.2496	0.0067	0	2696	33	1438	35	3856	50	DISC	DISC	62.7075
Hart1.14	46.5	0.761	21.11	0.72	0.267	0.0094	0	3135	32	1526	49	4433	39	DISC	DISC	65.5764
Hart1.16	1.53	0.108	348	40	3.15	0.34	0	5910	130	9100	530	4910	110	DISC	DISC	85.336
Hart1.35	7.15	4.5	25.6	6.9	0.383	0.06	0	2850	200	1950	230	3590	200	DISC	DISC	45.6825
Hart1.38	3.79	1.94	5.8	1.2	0.122	0.015	0	1590	220	723	83	2400	1200	DISC	DISC	54.5283
Hart1.51	105.7	0.796	5.47	0.18	0.1385	0.0046	0	1887	28	834	26	3399	49	DISC	DISC	55.8029
Hart1.72	15.4	0.773	14.66	0.95	0.202	0.012	0	2721	70	1185	65	4263	87	DISC	DISC	56.4498
Hart1.74	38.5	1.291	12.68	0.4	0.2161	0.0061	0	2642	30	1259	32	4002	52	DISC	DISC	68.5407
Hart1.76	11.24	0.368	5.73	0.93	0.1203	0.0099	0	1764	97	724	56	3430	200	DISC	DISC	58.9569
Hart1.80	3150	5.44	0.516	0.013	0.0438	0.0011	0	421.2	8.9	276.4	6.5	1342	42	DISC	DISC	34.378
Hart1.87	25.4	6.4	5.25	0.57	0.2416	0.0087	0	1771	88	1390	45	2190	180	DISC	DISC	36.5297
Hart1.90	41.5	0.5551	22.71	0.53	0.3055	0.0083	0	3206	23	1714	41	4351	42	DISC	DISC	60.6068

## Sheet: S9. U-Pb Hart2
Sample Name: Hartselle Sandstone		574577	3746103					207/235		206/238		207/206		Best age
Grain #	[U] ppm	U/Th	207/235	2σ error	206/238	2σ error	RHO	Age Ma	2σ error	Age (Ma)	2σ error	Age (Ma)	2σ error	(Ma)	2σ error	% Discordance*	Th/U
Hart2.43	242	53.2	0.625	0.022	0.0788	0.0017	0	492	15	488.9	9.9	462	86	488.9	9.9	0.630081	0.018797
Hart2.100	121.3	29.8	1.856	0.053	0.1843	0.0036	0	1062	19	1089	20	1014	55	1089	20	2.54237	0.033557
Hart2.41	92	16.8	0.665	0.052	0.0783	0.0017	0	502	29	486	10	480	130	486	10	3.18725	0.0595238
Hart2.24	438	11.5	1.857	0.083	0.1682	0.0061	0	1050	31	999	34	1057	47	999	34	4.85714	0.0869565
Hart2.16	234	10.22	1.921	0.053	0.1798	0.0031	0	1082	18	1065	17	1036	51	1065	17	1.57116	0.0978474
Hart2.112	227	8.8	1.94	0.11	0.191	0.011	0	1064	43	1118	63	1023	59	1118	63	5.07519	0.113636
Hart2.11	327	7.87	0.426	0.018	0.05571	0.00095	0	357	12	349.4	5.8	303	78	349.4	5.8	2.12885	0.127065
Hart2.79	88.3	5.27	1.803	0.065	0.1827	0.0033	0	1044	23	1081	18	955	67	1081	18	3.54406	0.189753
Hart2.89	60.9	5.09	1.612	0.082	0.1666	0.003	0	957	33	993	17	873	93	993	17	3.76176	0.196464
Hart2.33	216	4.73	2.25	0.12	0.1956	0.0045	0	1176	34	1150	24	1144	87	1150	24	2.21088	0.211416
Hart2.101	319	4.68	0.626	0.032	0.0686	0.0011	0	486	20	427.9	6.9	770	100	427.9	6.9	11.9547	0.213675
Hart2.81	114	4.58	1.797	0.06	0.173	0.0039	0	1043	20	1027	21	1065	60	1027	21	1.53404	0.218341
Hart2.12	397	4.58	1.993	0.063	0.1856	0.0031	0	1115	20	1097	17	1055	56	1097	17	1.61435	0.218341
Hart2.90	103	4.5	2.19	0.43	0.1854	0.0052	0	1054	39	1094	28	1020	130	1094	28	3.79507	0.222222
Hart2.113	167	4.38	1.689	0.066	0.1622	0.0029	0	995	23	968	16	1058	67	968	16	2.71357	0.228311
Hart2.92	437	4.15	2.49	0.11	0.1944	0.0091	0	1257	32	1166	44	1459	34	1166	44	7.23946	0.240964
Hart2.27	32.4	4.14	1.75	0.11	0.1652	0.0053	0	1001	40	983	29	890	140	983	29	1.7982	0.241546
Hart2.59	182	4.1	3.46	0.11	0.2585	0.0075	0	1511	24	1478	38	1557	33	1557	33	5.07386	0.243902
Hart2.38	90.5	3.97	2.137	0.067	0.197	0.0032	0	1154	21	1158	17	1087	62	1158	17	0.34662	0.251889
Hart2.76	298	3.94	3.168	0.097	0.2572	0.0057	0	1445	23	1473	30	1399	31	1399	31	5.28949	0.253807
Hart2.22	180	3.85	1.033	0.078	0.111	0.0059	0	698	35	676	34	677	93	676	34	3.15186	0.25974
Hart2.88	253	3.85	1.929	0.058	0.1847	0.0045	0	1087	20	1091	24	1074	57	1091	24	0.367985	0.25974
Hart2.53	79.1	3.8	1.886	0.084	0.1863	0.0043	0	1071	27	1100	23	945	89	1100	23	2.70775	0.263158
Hart2.37	147	3.8	2.703	0.094	0.2183	0.0062	0	1322	25	1270	33	1377	61	1377	61	7.77052	0.263158
Hart2.108	116.7	3.55	1.71	0.073	0.154	0.0068	0	1007	26	912	34	1243	79	912	34	9.43396	0.28169
Hart2.51	159.1	3.49	1.679	0.06	0.1663	0.0026	0	998	20	993	15	978	60	993	15	0.501002	0.286533
Hart2.49	164	3.47	1.995	0.089	0.1953	0.0042	0	1113	31	1148	22	1052	79	1148	22	3.14465	0.288184
Hart2.01	143	3.38	1.825	0.067	0.1767	0.0033	0	1044	25	1048	18	982	70	1048	18	0.383142	0.295858
Hart2.31	272	3.16	0.513	0.024	0.0638	0.0012	0	416	16	398.3	7.1	365	92	398.3	7.1	4.25481	0.316456
Hart2.28	66	3.16	2.05	0.099	0.1926	0.0049	0	1130	33	1134	26	993	98	1134	26	0.353982	0.316456
Hart2.111	298	3.14	2.335	0.06	0.2208	0.0048	0	1226	15	1279	23	1160	42	1160	23	4.323	0.318471
Hart2.66	143	3.04	1.572	0.093	0.1653	0.004	0	954	31	985	22	810	98	985	22	3.24948	0.328947
Hart2.74	177	3.02	1.913	0.063	0.1898	0.0049	0	1078	21	1118	27	978	55	1118	27	3.71058	0.331126
Hart2.04	339	2.957	1.763	0.054	0.1755	0.0034	0	1028	21	1041	19	935	59	1041	19	1.26459	0.338181
Hart2.47	28.3	2.9	1.52	0.12	0.1626	0.0067	0	905	49	968	37	700	150	968	37	6.96133	0.344828
Hart2.105	34.9	2.85	1.591	0.072	0.166	0.0044	0	953	28	992	23	850	100	992	23	4.09234	0.350877
Hart2.30	142	2.82	1.213	0.045	0.1252	0.0046	0	808	22	758	26	817	78	758	26	6.18812	0.35461
Hart2.52	38.8	2.82	3.81	0.15	0.2987	0.0065	0	1593	32	1682	32	1453	71	1453	71	15.7605	0.35461
Hart2.03	87.6	2.787	1.677	0.082	0.1621	0.0029	0	994	26	968	16	963	87	968	16	2.61569	0.358809
Hart2.62	188	2.77	2.57	0.11	0.229	0.0065	0	1280	34	1326	35	1261	50	1261	50	5.15464	0.361011
Hart2.25	208	2.73	4.078	0.088	0.2874	0.0049	0	1644	18	1627	24	1583	37	1583	37	2.77953	0.3663
Hart2.103	152	2.691	1.975	0.049	0.1945	0.0029	0	1106	16	1145	16	1025	47	1145	16	3.52622	0.371609
Hart2.102	107.1	2.62	1.786	0.058	0.1791	0.0038	0	1036	20	1064	21	970	57	1064	21	2.7027	0.381679
Hart2.67	162	2.611	3.251	0.085	0.2627	0.0045	0	1465	20	1502	23	1409	40	1409	40	6.60043	0.382995
Hart2.56	489	2.583	1.986	0.044	0.1939	0.0027	0	1107	15	1142	15	1030	36	1142	15	3.1617	0.387147
Hart2.91	33.4	2.5	1.63	0.13	0.1565	0.0052	0	941	51	935	29	910	150	935	29	0.63762	0.4
Hart2.58	60.5	2.479	1.833	0.095	0.1751	0.0049	0	1038	35	1038	27	1000	100	1038	27	0	0.403388
Hart2.02	312	2.46	4.533	0.069	0.3031	0.0047	0	1736	13	1705	23	1721	24	1721	24	0.929692	0.406504
Hart2.104	159	2.446	1.596	0.047	0.1644	0.0029	0	963	18	980	16	933	61	980	16	1.76532	0.408831
Hart2.60	137.1	2.421	1.635	0.063	0.1616	0.0041	0	974	24	965	22	976	66	965	22	0.924025	0.413052
Hart2.54	131.9	2.374	2.048	0.067	0.1917	0.0027	0	1130	23	1130	15	1090	63	1130	15	0	0.42123
Hart2.32	135.7	2.342	1.821	0.087	0.1673	0.0027	0	1044	26	998	14	1043	72	998	14	4.40613	0.426985
Hart2.15	263	2.2	3.161	0.08	0.2447	0.0047	0	1441	20	1409	24	1405	42	1405	42	0.284698	0.454545
Hart2.07	77.5	2.154	1.731	0.06	0.1691	0.0033	0	1012	22	1006	18	967	71	1006	18	0.592885	0.464253
Hart2.69	81.4	2.142	4.73	0.28	0.3196	0.0081	0	1740	26	1775	35	1679	51	1679	51	5.71769	0.466853
Hart2.70	97.6	2.138	2.36	0.19	0.19	0.012	0	1169	62	1108	65	1290	110	1108	65	5.21814	0.467727
Hart2.08	221	2.106	0.575	0.038	0.0694	0.0015	0	448	20	432.4	9.3	414	99	432.4	9.3	3.48214	0.474834
Hart2.55	209	2.063	2.006	0.076	0.1943	0.0049	0	1112	28	1147	26	1071	47	1147	26	3.14748	0.484731
Hart2.29	102.5	2	2.016	0.086	0.1881	0.0035	0	1113	29	1110	19	1026	82	1110	19	0.269542	0.5
Hart2.21	162.2	1.995	2.199	0.064	0.1975	0.0031	0	1178	19	1161	17	1099	57	1161	17	1.44312	0.501253
Hart2.65	70.8	1.971	1.375	0.069	0.1404	0.0036	0	876	31	846	20	930	100	846	20	3.42466	0.507357
Hart2.36	142	1.95	1.78	0.06	0.1678	0.004	0	1030	22	999	22	1011	70	999	22	3.00971	0.512821
Hart2.115	22.8	1.932	1.78	0.16	0.1723	0.0053	0	985	47	1026	30	880	140	1026	30	4.16244	0.517598
Hart2.119	133.7	1.87	1.601	0.067	0.1563	0.0052	0	972	26	927	26	1085	77	927	26	4.62963	0.534759
Hart2.71	31.4	1.854	3.47	0.21	0.2591	0.0067	0	1497	42	1482	34	1480	110	1480	110	0.135135	0.539374
Hart2.75	142.3	1.823	4.017	0.095	0.2904	0.0065	0	1631	20	1645	32	1624	32	1624	32	1.2931	0.548546
Hart2.05	179	1.807	1.627	0.057	0.1588	0.0038	0	971	23	949	21	952	63	949	21	2.26571	0.553403
Hart2.17	145	1.803	2.757	0.066	0.2218	0.0037	0	1341	17	1293	19	1328	47	1328	47	2.63554	0.554631
Hart2.98	38.9	1.776	3.33	0.21	0.2574	0.0069	0	1460	31	1481	33	1433	74	1433	74	3.34962	0.563063
Hart2.46	79.6	1.775	2.3	0.12	0.1887	0.0046	0	1216	40	1113	25	1376	98	1113	25	8.47039	0.56338
Hart2.96	104	1.769	1.877	0.062	0.1863	0.0034	0	1072	22	1100	18	1010	68	1100	18	2.61194	0.565291
Hart2.09	91.3	1.682	1.718	0.076	0.1542	0.0034	0	1001	29	924	19	1086	87	924	19	7.69231	0.59453
Hart2.78	77.9	1.68	1.827	0.065	0.177	0.0039	0	1051	24	1049	21	1033	77	1049	21	0.190295	0.595238
Hart2.106	60	1.68	4.16	0.14	0.2986	0.0069	0	1660	30	1681	35	1646	60	1646	60	2.12637	0.595238
Hart2.87	184	1.637	5.191	0.099	0.3403	0.0044	0	1846	16	1887	21	1813	26	1813	26	4.08163	0.610874
Hart2.77	81	1.62	1.797	0.088	0.1752	0.0049	0	1042	31	1042	27	1000	87	1042	27	0	0.617284
Hart2.80	98	1.557	0.502	0.03	0.0665	0.0014	0	407	20	414.8	8.5	320	120	414.8	8.5	1.91646	0.642261
Hart2.85	44.2	1.42	1.652	0.068	0.1644	0.004	0	982	27	980	22	969	91	980	22	0.203666	0.704225
Hart2.68	34.5	1.404	1.87	0.11	0.1742	0.0059	0	1050	39	1033	33	1040	110	1033	33	1.61905	0.712251
Hart2.61	271	1.401	1.801	0.049	0.1769	0.0036	0	1043	17	1049	20	1026	38	1049	20	0.575264	0.713776
Hart2.109	143	1.36	3.8	0.14	0.2893	0.0088	0	1585	31	1645	42	1537	42	1537	42	7.02668	0.735294
Hart2.34	35.2	1.324	14.78	0.69	0.518	0.02	0	2786	46	2670	87	2844	45	2844	45	6.11814	0.755287
Hart2.50	273	1.284	0.486	0.032	0.058	0.0013	0	390	17	363	7.7	499	83	363	7.7	6.92308	0.778816
Hart2.97	85.3	1.272	0.616	0.041	0.0748	0.0018	0	486	24	465	11	510	120	465	11	4.32099	0.786164
Hart2.14	72.2	1.234	2.175	0.096	0.1583	0.0077	0	1157	31	942	42	1537	82	942	42	18.5825	0.810373
Hart2.95	54.2	1.162	0.779	0.045	0.0954	0.0027	0	578	26	587	15	480	120	587	15	1.55709	0.860585
Hart2.64	58.7	1.14	1.91	0.12	0.1554	0.0045	0	1059	36	930	25	1282	96	930	25	12.1813	0.877193
Hart2.45	69.6	1.087	1.96	0.13	0.1752	0.0041	0	1077	38	1043	21	1040	110	1043	21	3.15692	0.919963
Hart2.94	107.8	1.083	0.522	0.025	0.0693	0.0013	0	426	17	431.8	7.7	380	100	431.8	7.7	1.3615	0.923361
Hart2.35	35.7	1.06	9.88	0.54	0.431	0.013	0	2407	48	2301	62	2436	65	2436	65	5.54187	0.943396
Hart2.44	324	1.04	0.535	0.021	0.0683	0.0015	0	431	14	425.6	8.8	406	80	425.6	8.8	1.2529	0.961538
Hart2.57	40.6	1.01	13.94	0.39	0.582	0.016	0	2739	28	2957	64	2581	37	2581	37	14.568	0.990099
Hart2.18	345	0.903	0.489	0.024	0.0624	0.0015	0	410	20	389.9	8.9	360	100	389.9	8.9	4.90244	1.10742
Hart2.86	12.6	0.896	0.87	0.17	0.078	0.015	0	522	83	421	37	790	370	421	37	19.3487	1.11607
Hart2.19	94	0.8	5.76	0.15	0.3546	0.0072	0	1943	21	1954	34	1822	43	1822	43	7.24479	1.25
Hart2.40	37.2	0.777	1.82	0.15	0.1577	0.0048	0	1009	37	942	27	1080	130	942	27	6.64024	1.287
Hart2.107	101.2	0.684	3.26	0.14	0.2444	0.0094	0	1461	38	1403	50	1559	42	1559	42	10.0064	1.46199
Hart2.99	59.7	0.5384	1.726	0.091	0.171	0.0031	0	1007	30	1017	17	947	97	1017	17	0.993049	1.85736
Hart2.84	26	0.51	11.44	0.5	0.476	0.015	0	2564	42	2499	69	2587	48	2587	48	3.40162	1.96078
Hart2.39	89.6	0.466	11.77	0.23	0.4874	0.0076	0	2581	18	2556	33	2576	29	2576	29	0.776398	2.14592
Hart2.110	36.3	0.3583	1.687	0.087	0.1636	0.0042	0	987	31	975	23	980	110	975	23	1.21581	2.79096
Hart2.10	53.6	0.2359	84.2	1.9	0.883	0.023	0	4515	21	4061	82	4650	25	4650	25	12.6667
Hart2.116	22.3	0.4247	94.9	3.1	0.921	0.034	0	4643	29	4220	110	4844	27	4844	27	12.8819
Hart2.06	3.31	0.0466	465	16	4.02	0.13	0	6220	33	10380	180	4970	35	DISC	DISC	108.853
Hart2.117	28.1	0.634	4.18	0.61	0.1561	0.0061	0	1515	89	932	34	2390	200	DISC	DISC	38.4818
Hart2.118	842	1.457	1.573	0.04	0.1136	0.002	0	955	16	693	12	1647	30	DISC	DISC	27.4346
Hart2.13	1910	2.08	0.721	0.026	0.0421	0.0028	0	547	16	265	17	1980	140	DISC	DISC	51.5539
Hart2.20	437	6.75	3.05	0.077	0.2157	0.0056	0	1413	20	1257	30	1595	34	DISC	DISC	21.1912
Hart2.26	795	7.21	0.686	0.063	0.0553	0.004	0	508	35	345	24	1209	80	DISC	DISC	32.0866
Hart2.48	36.7	1.393	6.59	0.77	0.217	0.011	0	1850	110	1255	58	2520	180	DISC	DISC	50.1984
Hart2.63	900	0.442	6.22	0.55	0.214	0.02	0	1880	90	1220	110	3001	41	DISC	DISC	59.3469
Hart2.72	6.1	0.823	0.65	0.18	0.0495	0.0048	0	460	110	311	29	1020	590	DISC	DISC	32.3913
Hart2.73	2	1.232	283	46	2.54	0.43	0	5550	160	7540	740	4986	67	DISC	DISC	51.2234
Hart2.82	154	2.751	3.42	0.13	0.2011	0.0056	0	1506	30	1189	27	1969	60	DISC	DISC	21.0491
Hart2.83	258	1.731	2.039	0.053	0.1454	0.0033	0	1124	17	874	18	1651	58	DISC	DISC	22.242
Hart2.93	207.9	1.71	0.759	0.039	0.0651	0.0015	0	572	23	406.2	9.2	1257	94	DISC	DISC	28.986
Hart2.114	0.04	0	0	0	0	0	0	0	0	0	0	0	0	#DIV/0!	#DIV/0!	#DIV/0!
Hart2.120	0.068	0	0	0	0	0	0	0	0	0	0	0	0	#DIV/0!	#DIV/0!	#DIV/0!
Hart2.23	-0.414	0	0	0	0	0	0	0	0	0	0	0	0	#DIV/0!	#DIV/0!	#DIV/0!
Hart2.42	0.098	0	0	0	0	0	0	0	0	0	0	0	0	#DIV/0!	#DIV/0!	#DIV/0!

## Sheet: S10. U-Pb Potts1
Sample Name: Lower Pottsville Fm		577018	3768024					207/235		206/238		207/206		Best age
Grain #	[U] ppm	U/Th	207/235	2σ error	206/238	2σ error	RHO	Age Ma	2σ error	Age (Ma)	2σ error	Age (Ma)	2σ error	(Ma)	2σ error	% Discordance*	Th/U
Potts1.52	206	3.8	0.488	0.032	0.0662	0.0024	0	398	22	413	14	320	130	413	14	3.76884	0.263158
Potts1.04	362	0.986	0.483	0.029	0.0663	0.0018	0	396	19	413	11	320	120	413	11	4.29293	1.0142
Potts1.23	978	2.83	0.427	0.011	0.0671	0.0013	0	359.7	8.1	418.7	7.8	39	44	418.7	7.8	16.4026	0.353357
Potts1.06	887	3.45	0.566	0.023	0.0689	0.0013	0	451	14	430	7.4	516	84	430	7.4	4.65632	0.289855
Potts1.29	317.6	1.261	0.459	0.02	0.0693	0.001	0	381	13	431.7	6.3	137	75	431.7	6.3	13.3071	0.793021
Potts1.60	901	2.036	0.59	0.013	0.0731	0.0015	0	469.4	8.6	454.6	8.8	586	61	454.6	8.8	3.15296	0.491159
Potts1.14	947	2.409	0.576	0.028	0.0735	0.0014	0	462	17	456.7	8.2	477	83	456.7	8.2	1.14719	0.41511
Potts1.59	311	1.879	0.672	0.028	0.0763	0.0012	0	517	17	473.7	7	660	83	473.7	7	8.37524	0.532198
Potts1.11	495	2.013	1.051	0.021	0.1044	0.0015	0	728	10	640	8.9	1044	47	640	8.9	12.0879	0.496771
Potts1.30	284	2.65	1.046	0.027	0.1357	0.0019	0	724	13	820	11	465	53	820	11	13.2597	0.377358
Potts1.8	790	3.236	1.59	0.086	0.1382	0.0085	0	941	34	826	47	1295	54	826	47	12.221	0.309023
Potts1.08	1180	6.34	1.406	0.081	0.1394	0.0053	0	881	35	838	30	980	100	838	30	4.88082	0.157729
Potts1.03	307	1.557	1.713	0.067	0.1395	0.0036	0	1009	27	840	20	1420	120	840	20	16.7493	0.642261
Potts1.20	251	2.12	1.18	0.03	0.1465	0.002	0	788	14	881	11	574	60	881	11	11.802	0.471698
Potts1.16	353	1.322	1.54	0.1	0.1557	0.0046	0	923	36	931	26	870	110	931	26	0.866739	0.75643
Potts1.40	72.9	1.344	1.395	0.068	0.1569	0.0045	0	877	28	938	25	680	100	938	25	6.95553	0.744048
Potts1.4	274	2.22	1.971	0.036	0.2054	0.0027	0	1103	12	1204	14	942	38	942	14	9.15684	0.45045
Potts1.33	311	2.449	2.02	0.057	0.2078	0.0058	0	1116	19	1215	31	953	46	953	31	8.87097	0.40833
Potts1.43	300.4	3.561	1.507	0.046	0.1607	0.0041	0	930	19	959	23	856	52	959	23	3.11828	0.28082
Potts1.24	569	2.6	1.325	0.029	0.1608	0.0029	0	856	12	960	16	642	39	960	16	12.1495	0.384615
Potts1.12	98.5	1.52	1.351	0.047	0.1648	0.0038	0	861	20	982	21	601	71	982	21	14.0534	0.657895
Potts1.01	734	3.34	1.79	0.075	0.1682	0.0048	0	1033	28	1000	27	1119	49	1000	27	3.19458	0.299401
Potts1.25	161.3	2.89	1.499	0.059	0.1689	0.0056	0	921	23	1008	32	785	73	1008	32	9.44625	0.346021
Potts1.26	670	2.72	1.656	0.064	0.1701	0.0075	0	981	26	1008	42	1000	42	1008	42	2.75229	0.367647
Potts1.24	341	1.259	1.76	0.071	0.1708	0.0046	0	1029	24	1014	25	1044	78	1014	25	1.45773	0.794281
Potts1.05	863	6.01	1.638	0.056	0.1709	0.0036	0	987	23	1021	21	912	65	1021	21	3.44478	0.166389
Potts1.31	230	1.243	1.596	0.041	0.1727	0.0034	0	967	16	1026	19	868	50	1026	19	6.10134	0.804505
Potts1.44	180	1.121	1.717	0.064	0.174	0.0057	0	1006	24	1032	31	948	63	1032	31	2.58449	0.892061
Potts1.32	180.1	2.15	1.595	0.035	0.1742	0.0024	0	965	14	1035	13	826	45	1035	13	7.25389	0.465116
Potts1.16	175	2.236	1.47	0.049	0.1754	0.003	0	915	19	1041	16	651	63	1041	16	13.7705	0.447227
Potts1.47	211	1.304	1.784	0.088	0.1762	0.0074	0	1022	33	1042	41	985	69	1042	41	1.95695	0.766871
Potts1.7	567	1.214	2.165	0.067	0.212	0.006	0	1172	21	1237	32	1062	38	1062	32	5.54608	0.823723
Potts1.42	452	14.6	1.766	0.058	0.1845	0.0061	0	1028	22	1089	33	905	55	1089	33	5.93385	0.0684932
Potts1.17	1720	7.4	1.96	0.055	0.1844	0.0033	0	1094	19	1090	18	1097	47	1090	18	0.365631	0.135135
Potts1.57	209	4.79	1.92	0.052	0.1844	0.0033	0	1083	18	1090	18	1058	50	1090	18	0.646353	0.208768
Potts1.18	96.3	2.408	1.657	0.059	0.1876	0.0029	0	984	22	1108	16	764	83	1108	16	12.6016	0.415282
Potts1.2	11.05	-610000	2.79	0.33	0.19	0.013	0	1271	82	1114	67	1570	220	1114	67	12.3525
Potts1.18	219	3.52	2.17	0.16	0.1944	0.0046	0	1126	41	1143	25	1050	130	1143	25	1.50977	0.284091
Potts1.6	174	3.29	2.566	0.051	0.2403	0.0035	0	1287	14	1387	18	1147	44	1147	18	7.77001	0.303951
Potts1.35	357	20.4	1.967	0.061	0.1971	0.0052	0	1097	21	1158	28	989	49	1158	28	5.56062	0.0490196
Potts1.13	362	5.3	2.269	0.084	0.1973	0.004	0	1193	25	1160	21	1248	60	1160	21	2.76614	0.188679
Potts1.54	237	3.19	2.153	0.081	0.1988	0.0059	0	1158	27	1166	31	1144	56	1166	31	0.690846	0.31348
Potts1.48	446	3.166	2.038	0.069	0.199	0.0065	0	1119	23	1167	35	1031	48	1167	35	4.28954	0.315856
Potts1.3	230.3	1.642	2.47	0.16	0.2002	0.0045	0	1259	42	1175	24	1434	87	1175	24	6.67196	0.609013
Potts1.17	170.6	1.21	2.105	0.086	0.2009	0.0063	0	1136	30	1177	34	1107	52	1177	34	3.60915	0.826446
Potts1.22	214.9	1.519	2.59	0.1	0.2374	0.0084	0	1285	28	1368	43	1178	49	1178	43	6.45914	0.658328
Potts1.38	363	1.694	2.144	0.04	0.2008	0.0032	0	1160	13	1179	17	1138	40	1179	17	1.63793	0.590319
Potts1.15	390	1.63	2.748	0.052	0.2552	0.0044	0	1340	14	1464	23	1180	33	1180	23	9.25373	0.613497
Potts1.37	255	2.732	2.539	0.083	0.2294	0.0068	0	1274	24	1328	36	1196	45	1196	36	4.23862	0.366032
Potts1.36	40.5	0.94	2.77	0.11	0.2459	0.0051	0	1334	29	1416	26	1206	77	1206	77	17.4129	1.06383
Potts1.9	221.4	1.287	2.731	0.059	0.2399	0.0036	0	1333	16	1386	19	1282	38	1282	38	8.11232	0.777001
Potts1.34	144.2	1.617	3.29	0.12	0.274	0.011	0	1465	29	1554	56	1374	55	1374	55	13.1004	0.618429
Potts1.02	550	1.82	2.71	0.11	0.2223	0.0054	0	1329	28	1297	30	1410	49	1410	49	8.01418	0.549451
Potts1.53	381	1.833	3.212	0.075	0.2542	0.0052	0	1455	18	1458	27	1437	40	1437	40	1.46138	0.545554
Potts1.39	338	3.08	3.492	0.07	0.276	0.0051	0	1521	17	1570	27	1459	28	1459	28	7.60795	0.324675
Potts1.56	258	1.67	3.15	0.12	0.2423	0.0083	0	1441	29	1394	42	1459	45	1459	45	4.45511	0.598802
Potts1.11	329	2.301	2.654	0.097	0.2107	0.0053	0	1308	29	1230	28	1479	67	1479	67	16.8357	0.434594
Potts1.21	233	2.111	3.62	0.14	0.267	0.0063	0	1547	31	1522	32	1559	64	1559	64	2.37332	0.473709
Potts1.49	442	2.43	3.814	0.087	0.2842	0.0067	0	1590	18	1610	34	1563	32	1563	32	3.00704	0.411523
Potts1.46	113.9	1.31	3.59	0.12	0.256	0.011	0	1551	32	1461	60	1603	84	1603	84	8.85839	0.763359
Potts1.20	736	2.556	8.82	0.26	0.417	0.01	0	2311	28	2244	46	2375	23	2375	23	5.51579	0.391236
Potts1.21	263	1.362	9.33	0.26	0.435	0.013	0	2360	26	2318	57	2436	17	2436	17	4.84401	0.734214
Potts1.14	114.6	2.635	11.89	0.17	0.5333	0.007	0	2594	13	2757	29	2509	22	2509	22	9.88442	0.379507
Potts1.22	245	1.482	12.13	0.31	0.502	0.01	0	2609	23	2619	43	2627	39	2627	39	0.30453	0.674764
Potts1.51	422	3.05	12.81	0.3	0.509	0.012	0	2658	22	2645	50	2663	23	2663	23	0.675929	0.327869
Potts1.45	7.83	0.0343	102.8	4.5	1.053	0.046	0	4689	43	4600	140	4753	56	4753	56	3.21902	29.1545
Potts1.13	20.04	1.221	9.04	0.51	0.1535	0.0077	0	2314	50	916	43	4021	63	DISC	DISC	60.4149
Potts1.19	11.78	8.7	5.15	0.92	0.211	0.01	0	1620	120	1226	52	2030	220	DISC	DISC	39.6059
Potts1.28	76	0.895	1.07	0.044	0.0895	0.0026	0	734	21	552	15	1374	90	DISC	DISC	24.7956
Potts1.07	2980	1.263	3.79	0.13	0.204	0.015	0	1578	29	1175	79	2340	120	DISC	DISC	25.5387
Potts1.09	644	2.2	3.68	0.16	0.2021	0.0042	0	1546	33	1185	22	2034	79	DISC	DISC	23.3506
Potts1.15	1217	20.6	2.946	0.096	0.2132	0.0051	0	1386	26	1247	28	1614	39	DISC	DISC	22.7385
Potts1.19	38.5	0.703	22.5	1	0.25	0.012	0	3167	50	1436	60	4620	86	DISC	DISC	68.9177
Potts1.25	147	0.888	25.98	0.7	0.324	0.01	0	3332	26	1803	51	4457	35	DISC	DISC	59.5468
Potts1.26	4.26	0.0822	51.3	6.8	0.544	0.075	0	3880	130	2710	300	4830	200	DISC	DISC	43.8923
Potts1.41	-0.00099691	0	0	0	0	0	0	0	0	0	0	0	0	#DIV/0!	#DIV/0!	#DIV/0!
Potts1.10	1.32	0	0	0	0	0	0	0	0	0	0	0	0	#DIV/0!	#DIV/0!	#DIV/0!
Potts1.12	4.1	0	0	0	0	0	0	0	0	0	0	0	0	#DIV/0!	#DIV/0!	#DIV/0!
Potts1.23	0.075	0	0	0	0	0	0	0	0	0	0	0	0	#DIV/0!	#DIV/0!	#DIV/0!

[truncated: 8 more sheets: S11. U-Pb Potts2, S12. U-Pb Cheaha1, S13. U-Pb Cheaha2, S14. U-Pb LD1, S15. U-Pb Hollis1, S16.a (U-Th)He data, S16.b HeFTy inputs, S16.c HeFTy model results]
